# Supplementary material for: Omnitrophota encompasses diverse and hyperactive nanobacteria: Potential metabolisms and host-dependent lifestyles
Source: Research Square preprint supplement (doi:10.21203/rs.3.rs-1352086/v1), 2022-03-02
Supplement: Supplementary file 2 [file 99b37fb89a8f08d6112d4194.xlsx]

## Sheet: Table S1 - Genome info
Genome Identifier	INSDC Identifier	Other Sequence Identifier/s	Genome Type	Pubmed Identifier	BioProject	BioSample	Completeness	Contamination	Scaffold N50	# Scaffolds	Bin Size (Mb)	Est. Bin Size (Mb)	tRNAs	SSU	LSU	TSU	Coverage	Phylum	Class	Order	Family	Genus	Species	Type	GTDB-Tk taxonomy	Geolocation	Biome	note
1	GCA_001804125.1	RIFCSPHIGHO2_02_FULL_51_18	MAG	29364876, 27774985, 26844018, 28077874	PRJNA288027	SAMN04315400	100	0	33273	69	1.52665	1.526646	19/0	*	*	*	N/A	Omnitrophota	2-02-FULL-51-18	2-02-FULL-51-18	2-02-FULL-51-18	2-02-FULL-51-18	2-02-FULL-51-18 sp001804125		d__Bacteria;p__Omnitrophota;c__Koll11;o__2-02-FULL-51-18;f__2-02-FULL-51-18;g__2-02-FULL-51-18;s__2-02-FULL-51-18 sp001804125	USA: Rifle, Colorado	soil
2	GCA_001874025.1	CG1_02_46_14	MAG	27112493, 26837824	PRJNA297582	SAMN04328228	74.55	5.98	10135	149	1.19141	1.50256950020121	10/0	*			N/A	Omnitrophota	2-02-FULL-51-18	2-02-FULL-51-18	2-02-FULL-51-18	20-14-0-80-50-8	20-14-0-80-50-8 sp. GCA-001874025-1		d__Bacteria;p__Omnitrophota;c__Koll11;o__2-02-FULL-51-18;f__2-02-FULL-51-18;g__20-14-0-80-50-8;s__	USA: near Green River, Utah	water
3	GCA_001874025.1*	IMG_2786546449; CG1_02_46_14	MAG	27112493, 26837824	PRJNA297582	SAMN04328228	74.55	5.98	10135	149	1.19141	1.50256950020121	10/0	*			-	Omnitrophota	2-02-FULL-51-18	2-02-FULL-51-18	2-02-FULL-51-18	20-14-0-80-50-8	20-14-0-80-50-8 sp. GCA-001874025-1		d__Bacteria;p__Omnitrophota;c__Koll11;o__2-02-FULL-51-18;f__2-02-FULL-51-18;g__20-14-0-80-50-8;s__	USA: near Green River, Utah	water	Duplicate of GCA_001874025.1
4	GCA_001872105.1	CG1_02_49_16	MAG	27112493, 26837824	PRJNA297582	SAMN04328227	57.77	7.27	18601	81	0.956248	1.53492949697075	10/0				N/A	Omnitrophota	2-02-FULL-51-18	2-02-FULL-51-18	2-02-FULL-51-18	20-14-0-80-50-8	20-14-0-80-50-8 sp002779345		d__Bacteria;p__Omnitrophota;c__Koll11;o__2-02-FULL-51-18;f__2-02-FULL-51-18;g__20-14-0-80-50-8;s__20-14-0-80-50-8 sp002779345	USA: near Green River, Utah	water
5	GCA_002779345.1	CG07_land_8_20_14_0_80_50_8	MAG	29379208	PRJNA362739	SAMN06659249	66.45	0	5754	195	1.03923	1.5639352896915	16/2	*			N/A	Omnitrophota	2-02-FULL-51-18	2-02-FULL-51-18	2-02-FULL-51-18	20-14-0-80-50-8	20-14-0-80-50-8 sp002779345		d__Bacteria;p__Omnitrophota;c__Koll11;o__2-02-FULL-51-18;f__2-02-FULL-51-18;g__20-14-0-80-50-8;s__20-14-0-80-50-8 sp002779345	USA: Utah, Grand County	groundwater
6	GCA_002779345.1*	IMG_2786546442; CG07_land_8_20_14_0_80_50_8	MAG	29379208	PRJNA362739	SAMN06659249	66.45	0	5754	195	1.03923	1.5639352896915	16/1	*			-	Omnitrophota	2-02-FULL-51-18	2-02-FULL-51-18	2-02-FULL-51-18	20-14-0-80-50-8	20-14-0-80-50-8 sp002779345		d__Bacteria;p__Omnitrophota;c__Koll11;o__2-02-FULL-51-18;f__2-02-FULL-51-18;g__20-14-0-80-50-8;s__20-14-0-80-50-8 sp002779345	USA: Utah, Grand County	groundwater	Duplicate of GCA_002779345.1
7	GCA_001872105.1*	IMG_2786546451; CG1_02_49_16	MAG	27112493, 26837824	PRJNA297582	SAMN04328227	57.77	7.27	18601	81	0.956248	1.53492949697075	10/0				-	Omnitrophota	2-02-FULL-51-18	2-02-FULL-51-18	2-02-FULL-51-18	20-14-0-80-50-8	20-14-0-80-50-8 sp002779345		d__Bacteria;p__Omnitrophota;c__Koll11;o__2-02-FULL-51-18;f__2-02-FULL-51-18;g__20-14-0-80-50-8;s__20-14-0-80-50-8 sp002779345	USA: near Green River, Utah	water	Duplicate of GCA_001872105.1
8		SAG_3300015549	SAG	33013724	PRJNA406385	SAMN07630218	22.98	0	10365	89	0.670048	-	9/1					Omnitrophota	2-02-FULL-51-18	2-02-FULL-51-18	2-02-FULL-51-18 fam.	2-02-FULL-51-18 fam. gen.	2-02-FULL-51-18 fam. gen. sp. SAG-3300015549		d__Bacteria;p__Omnitrophota;c__Koll11;o__2-02-FULL-51-18;f__;g__;s__	USA: Nevada	geothermal spring
9		SAG_3300016236	SAG	33013724	PRJNA404726	SAMN07629962	14.88	0	14735	56	0.475721	-	8/1	*	*	*		Omnitrophota	2-02-FULL-51-18	2-02-FULL-51-18	2-02-FULL-51-18 fam.	2-02-FULL-51-18 fam. gen.	2-02-FULL-51-18 fam. gen. sp. SAG-3300016236		d__Bacteria;p__Omnitrophota;c__Koll11;o__2-02-FULL-51-18;f__;g__;s__	USA: South Dakota	wastewater
10		SAG_3300016275	SAG	33013724	PRJNA406537	SAMN07631614	40	0	19777	57	0.756571	-	13/0	*	*			Omnitrophota	2-02-FULL-51-18	2-02-FULL-51-18	2-02-FULL-51-18 fam.	2-02-FULL-51-18 fam. gen.	2-02-FULL-51-18 fam. gen. sp. SAG-3300016275		d__Bacteria;p__Omnitrophota;c__Koll11;o__2-02-FULL-51-18;f__;g__;s__	USA: South Dakota	wastewater
11		SAG_3300016439	SAG	33013724	PRJNA404715	SAMN07629951	45.45	0	34625	67	1.32072	-	14/0		*	*		Omnitrophota	2-02-FULL-51-18	2-02-FULL-51-18	2-02-FULL-51-18 fam.	2-02-FULL-51-18 fam. gen.	2-02-FULL-51-18 fam. gen. sp. SAG-3300016439		d__Bacteria;p__Omnitrophota;c__Koll11;o__2-02-FULL-51-18;f__2-02-FULL-51-18;g__;s__	USA: South Dakota	wastewater
12	GCA_001804145.1	RIFCSPHIGHO2_02_FULL_63_14	MAG	29364876, 27774985, 26844018, 28077875	PRJNA288027	SAMN04315481	63.64	5.45	22672	74	1.24372	1.84780027734129	18/2	*			N/A	Omnitrophota	2-02-FULL-51-18	2-02-FULL-51-18	GCA-001804145-1	GCA-001804145-1	GCA-001804145-1 sp. GCA-001804145-1		d__Bacteria;p__Omnitrophota;c__Koll11;o__2-02-FULL-51-18;f__;g__;s__	USA: Rifle, Colorado	soil
13		SAG_3300016432	SAG	33013724	PRJNA404714	SAMN07629950	87.27	0	29334	81	1.21412	1.39121691302853	15/0	*	*	*		Omnitrophota	2-02-FULL-51-18	2-02-FULL-51-18	SAG-3300016432	SAG-3300016432	SAG-3300016432 sp. SAG-3300016432		d__Bacteria;p__Omnitrophota;c__Koll11;o__2-02-FULL-51-18;f__;g__;s__	USA: South Dakota	wastewater
14	GCA_002085025.1	4484_213	MAG	31015394	PRJNA362212	SAMN06560474	85.54	10.91	23494	53	0.932608	-	17/1	*			91.0x	Omnitrophota	4484-213	4484-213	4484-213	4484-213	4484-213 sp002085025		d__Bacteria;p__Omnitrophota;c__4484-213;o__4484-213;f__4484-213;g__4484-213;s__4484-213 sp002085025	USA: Guaymas Basin, Gulf of California	saline sediment
15	GCA_003645805.1	B17_G2	MAG	31015394	PRJNA362212	SAMN09215074	96.36	4.55	14669	79	0.869646	0.861433278331258	19/1		*	*	37.96x	Omnitrophota	4484-213	4484-213	4484-213	B17-G2	B17-G2 sp003645805		d__Bacteria;p__Omnitrophota;c__4484-213;o__4484-213;f__4484-213;g__B17-G2;s__B17-G2 sp003645805	Mexico: Guaymas Basin, Gulf of California	saline sediment
16	GCA_002787095.1	CG11_big_fil_rev_8_21_14_0_20_64_10	MAG	29379208	PRJNA362739	SAMN06659525	96.36	0	32043	73	1.72563	1.79081257783313	19/0	*	*	*	N/A	Omnitrophota	Aquiviventia	1-14-0-20-64-10	1-14-0-20-64-10	1-14-0-20-64-10	1-14-0-20-64-10 sp002787095		d__Bacteria;p__Omnitrophota;c__Koll11;o__1-14-0-20-64-10;f__1-14-0-20-64-10;g__1-14-0-20-64-10;s__1-14-0-20-64-10 sp002787095	USA: Utah, Grand County	groundwater
17	GCA_002787095.1*	IMG_2786546432; CG11_big_fil_rev_8_21_14_0_20_64_10	MAG	29379208	PRJNA362739	SAMN06659525	96.36	0	32043	73	1.72563	1.79081257783313	19/0	*	*	*	-	Omnitrophota	Aquiviventia	1-14-0-20-64-10	1-14-0-20-64-10	1-14-0-20-64-10	1-14-0-20-64-10 sp002787095		d__Bacteria;p__Omnitrophota;c__Koll11;o__1-14-0-20-64-10;f__1-14-0-20-64-10;g__1-14-0-20-64-10;s__1-14-0-20-64-10 sp002787095	USA: Utah, Grand County	groundwater	Duplicate of GCA_002787095.1
18		IMG_2713897464	SAG	33013724			65.7	0	17394	90	1.01983	1.5522496194825	14/0	*	*	*		Omnitrophota	Aquiviventia	1-14-0-20-64-10	1-14-0-20-64-10	JZ-2-99-201901	JZ-2-99-201901 sp. IMG-2713897464		d__Bacteria;p__Omnitrophota;c__Koll11;o__1-14-0-20-64-10;f__1-14-0-20-64-10;g__;s__	USA: Cold Creek Source, Nevada	groundwater
19		IMG_2713897468	SAG	33013724			19.01	0	8739	73	0.512212	-	10/0	*	*	*		Omnitrophota	Aquiviventia	1-14-0-20-64-10	1-14-0-20-64-10	JZ-2-99-201901	JZ-2-99-201901 sp. IMG-2713897468		d__Bacteria;p__Omnitrophota;c__Koll11;o__1-14-0-20-64-10;f__1-14-0-20-64-10;g__;s__	USA: Crystal Spring, Nevada, USA	groundwater
20		JZ_2.bins.210.201901	MAG				33.64	0	624287	5	1.01025	-	14/0		*	*		Omnitrophota	Aquiviventia	1-14-0-20-64-10	1-14-0-20-64-10	JZ-2-99-201901	JZ-2-99-201901 sp. JZ-2-210-201901		d__Bacteria;p__Omnitrophota;c__Koll11;o__1-14-0-20-64-10;f__1-14-0-20-64-10;g__;s__	China: Jinze Spring, Tengchong	geothermal spring
21		JZ_2.bins.99.201901	MAG				63.64	0	697180	5	0.93682	1.4720615964802	16/2					Omnitrophota	Aquiviventia	1-14-0-20-64-10	1-14-0-20-64-10	JZ-2-99-201901	JZ-2-99-201901 sp. JZ-2-99-201901		d__Bacteria;p__Omnitrophota;c__Koll11;o__1-14-0-20-64-10;f__1-14-0-20-64-10;g__;s__	China: Jinze Spring, Tengchong	geothermal spring
22		SAG_3300015417	SAG	33013724	PRJNA406432	SAMN07630223	25.45	0	19331	103	1.20296	-	17/1	*	*	*		Omnitrophota	Aquiviventia	1-14-0-20-64-10	1-14-0-20-64-10	JZ-2-99-201901	JZ-2-99-201901 sp. SAG-3300015417		d__Bacteria;p__Omnitrophota;c__Koll11;o__1-14-0-20-64-10;f__1-14-0-20-64-10;g__;s__	USA: Nevada	water
23	GCA_001805725.1	RIFCSPHIGHO2_02_FULL_68_15	MAG	29364876, 27774985, 26844018, 28077876	PRJNA288027	SAMN04315406	81.82	5.45	19916	109	1.82052	2.10376523405035	19/2	*	*	*	N/A	Omnitrophota	Aquiviventia	1-14-0-20-64-10	GCA-001805725-1	GCA-001805725-1	GCA-001805725-1 sp. GCA-001805725-1		d__Bacteria;p__Omnitrophota;c__Koll11;o__1-14-0-20-64-10;f__;g__;s__	USA: Rifle, Colorado	soil
24	GCA_001805695.1	RIFCSPHIGHO2_02_FULL_67_20	MAG	29364876, 27774985, 26844018, 28077877	PRJNA288027	SAMN04315331	70.55	1.82	27517	42	0.844698	1.17551310616584	12/0				N/A	Omnitrophota	Aquiviventia	Aquiviventales	Aquiviventaceae	2-02-FULL-67-20	2-02-FULL-67-20 sp001805695		d__Bacteria;p__Omnitrophota;c__Koll11;o__UBA9649;f__UBA9649;g__2-02-FULL-67-20;s__2-02-FULL-67-20 sp001805695	USA: Rifle, Colorado	soil
25	GCA_002796105.1	CG11_big_fil_rev_8_21_14_0_20_63_9	MAG	29379208	PRJNA362739	SAMN06659524	79.92	0	25333	105	1.85792	2.32472472472472	19/0		*	*	N/A	Omnitrophota	Aquiviventia	Aquiviventales	Aquiviventaceae	21-14-0-20-63-9	21-14-0-20-63-9 sp002796105		d__Bacteria;p__Omnitrophota;c__Koll11;o__UBA9649;f__UBA9649;g__21-14-0-20-63-9;s__21-14-0-20-63-9 sp002796105	USA: Utah, Grand County	groundwater
26	GCA_002796105.1*	IMG_2786546433; CG11_big_fil_rev_8_21_14_0_20_63_9	MAG	29379208	PRJNA362739	SAMN06659524	79.92	0	25333	105	1.85792	2.32472472472472	19/0		*	*	-	Omnitrophota	Aquiviventia	Aquiviventales	Aquiviventaceae	21-14-0-20-63-9	21-14-0-20-63-9 sp002796105		d__Bacteria;p__Omnitrophota;c__Koll11;o__UBA9649;f__UBA9649;g__21-14-0-20-63-9;s__21-14-0-20-63-9 sp002796105	USA: Utah, Grand County	groundwater	Duplicate of GCA_002796105.1
27		SAG_3300010779	MAG	33013724	PRJNA444468	SAMN08776657	16.12	0	8308	44	0.305338	-	7/0	*	*	*		Omnitrophota	Aquiviventia	Aquiviventales	Aquiviventaceae	Aquiviventaceae gen.	Aquiviventaceae gen. sp. SAG-3300010779		d__Bacteria;p__Omnitrophota;c__Koll11;o__UBA9649;f__UBA9649;g__;s__	USA: Beatty, Nevada	groundwater
28		SAG_3300015379	SAG	33013724	PRJNA406412	SAMN07631838	14.38	0.17	10007	56	0.386354	-	8/0	*	*	*		Omnitrophota	Aquiviventia	Aquiviventales	Aquiviventaceae	Aquiviventaceae gen.	Aquiviventaceae gen. sp. SAG-3300015379		d__Bacteria;p__Omnitrophota;c__Koll11;o__UBA9649;f__UBA9649;g__;s__	USA: Nevada	water
29		SAG_3300015416	SAG	33013724	PRJNA406393	SAMN07631821	38.6	0	11162	135	1.11278	-	16/1	*	*	*		Omnitrophota	Aquiviventia	Aquiviventales	Aquiviventaceae	Aquiviventaceae gen.	Aquiviventaceae gen. sp. SAG-3300015416		d__Bacteria;p__Omnitrophota;c__Koll11;o__UBA9649;f__UBA9649;g__;s__	USA: Nevada	water
30		SAG_3300015818	SAG		PRJNA404555	SAMN07630492	11.82	0	8762	42	0.293205	-	4/0					Omnitrophota	Aquiviventia	Aquiviventales	Aquiviventaceae	Aquiviventaceae gen.	Aquiviventaceae gen. sp. SAG-3300015818		d__Bacteria;p__Omnitrophota;c__Koll11;o__UBA9649;f__UBA9649;g__SBAZ01;s__	USA: Nevada	groundwater
31		SAG_3300016014	SAG		PRJNA404557	SAMN07630494	21.27	0	6958	85	0.492139	-	4/0					Omnitrophota	Aquiviventia	Aquiviventales	Aquiviventaceae	Aquiviventaceae gen.	Aquiviventaceae gen. sp. SAG-3300016014		d__Bacteria;p__Omnitrophota;c__Koll11;o__UBA9649;f__UBA9649;g__;s__	USA: Nevada	groundwater
32		SAG_3300016197	SAG	33013724	PRJNA404708	SAMN07629944	13.55	0	5451	45	0.215605	-	9/0	*	*	*		Omnitrophota	Aquiviventia	Aquiviventales	Aquiviventaceae	Aquiviventaceae gen.	Aquiviventaceae gen. sp. SAG-3300016197		d__Bacteria;p__Omnitrophota;c__Koll11;o__UBA9649;f__UBA9649;g__;s__	USA: South Dakota	wastewater
33		SAG_3300016370	SAG	33013724	PRJNA406506	SAMN07631736	35.45	0	15435	101	0.895405	-	14/0		*	*		Omnitrophota	Aquiviventia	Aquiviventales	Aquiviventaceae	Aquiviventaceae gen.	Aquiviventaceae gen. sp. SAG-3300016370		d__Bacteria;p__Omnitrophota;c__Koll11;o__UBA9649;f__UBA9649;g__;s__	USA: Nevada	groundwater
34		SAG_3300016410	SAG	33013724	PRJNA406490	SAMN07631750	28.64	0	9826	140	0.95372	-	13/0	*	*	*		Omnitrophota	Aquiviventia	Aquiviventales	Aquiviventaceae	Aquiviventaceae gen.	Aquiviventaceae gen. sp. SAG-3300016410		d__Bacteria;p__Omnitrophota;c__Koll11;o__UBA9649;f__UBA9649;g__2-02-FULL-67-20;s__	USA: Nevada	groundwater
35		SAG_3300016411	SAG	33013724	PRJNA406503	SAMN07631733	43.57	0	15594	109	1.02856	-	15/1	*	*	*		Omnitrophota	Aquiviventia	Aquiviventales	Aquiviventaceae	Aquiviventaceae gen.	Aquiviventaceae gen. sp. SAG-3300016411		d__Bacteria;p__Omnitrophota;c__Koll11;o__UBA9649;f__UBA9649;g__2-02-FULL-67-20;s__	USA: Nevada	groundwater
36	GCA_001804415.1	GWA2_63_20	MAG	29364876, 27774985, 26844018, 28077878	PRJNA288027	SAMN04314113	94.55	0	48868	46	1.4204	1.50226864093072	19/0	*	*	*	N/A	Omnitrophota	Aquiviventia	Aquiviventales	Aquiviventaceae	Aquivivens	Aquivivens invisus		d__Bacteria;p__Omnitrophota;c__Koll11;o__UBA9649;f__UBA9649;g__UBA9649;s__UBA9649 sp001804415	USA: Rifle, Colorado	soil
37	GCA_001804485.1	GWF2_63_9	MAG	29364876, 27774985, 26844018, 28077879	PRJNA288027	SAMN04314226	73.45	0	17035	103	1.46283	1.99160381211709	17/0	*	*	*	N/A	Omnitrophota	Aquiviventia	Aquiviventales	Aquiviventaceae	Aquivivens	Aquivivens invisus		d__Bacteria;p__Omnitrophota;c__Koll11;o__UBA9649;f__UBA9649;g__UBA9649;s__UBA9649 sp001804415	USA: Rifle, Colorado	soil
38	GCA_001805685.1	RIFCSPHIGHO2_02_FULL_63_39	MAG	29364876, 27774985, 26844018, 28077880	PRJNA288027	SAMN04315326	92.73	0	38615	61	1.3951	1.50447859376685	18/0	*	*	*	N/A	Omnitrophota	Aquiviventia	Aquiviventales	Aquiviventaceae	Aquivivens	Aquivivens invisus		d__Bacteria;p__Omnitrophota;c__Koll11;o__UBA9649;f__UBA9649;g__UBA9649;s__UBA9649 sp001804415	USA: Rifle, Colorado	soil
39	GCA_001805735.1	RIFCSPHIGHO2_12_FULL_64_13	MAG	29364876, 27774985, 26844018, 28077881	PRJNA288027	SAMN04315608	68.76	0	11358	94	1.01448	1.47539412449098	16/0				N/A	Omnitrophota	Aquiviventia	Aquiviventales	Aquiviventaceae	Aquivivens	Aquivivens invisus		d__Bacteria;p__Omnitrophota;c__Koll11;o__UBA9649;f__UBA9649;g__UBA9649;s__UBA9649 sp001804415	USA: Rifle, Colorado	soil
40	GCA_001805815.1	RIFCSPLOWO2_02_FULL_63_16	MAG	29364876, 27774985, 26844018, 28077882	PRJNA288027	SAMN04316059	98.18	1.82	47310	62	1.70241	1.702408	19/0	imputed from _GCA_001804485.1	*	*	N/A	Omnitrophota	Aquiviventia	Aquiviventales	Aquiviventaceae	Aquivivens	Aquivivens invisus	Yes	d__Bacteria;p__Omnitrophota;c__Koll11;o__UBA9649;f__UBA9649;g__UBA9649;s__UBA9649 sp001804415	USA: Rifle, Colorado	groundwater
41	GCA_001805925.1	RIFCSPLOWO2_12_FULL_63_16	MAG	29364876, 27774985, 26844018, 28077883	PRJNA288027	SAMN04315876	96.36	0	54370	51	1.65354	1.71600352843504	18/0	*	*	*	N/A	Omnitrophota	Aquiviventia	Aquiviventales	Aquiviventaceae	Aquivivens	Aquivivens invisus		d__Bacteria;p__Omnitrophota;c__Koll11;o__UBA9649;f__UBA9649;g__UBA9649;s__UBA9649 sp001804415	USA: Rifle, Colorado	soil
42	GCA_003452895.1	UBA12497	MAG	28894102	PRJNA417962	SAMN08017904	78.18	0	9986	299	2.21393	2.83183422870299	18/0	*	*	*	7.40x	Omnitrophota	Aquiviventia	Aquiviventales	Aquiviventaceae	Aquivivens	Aquivivens invisus		d__Bacteria;p__Omnitrophota;c__Koll11;o__UBA9649;f__UBA9649;g__UBA9649;s__UBA9649 sp001804415	USA: Rifle, Colorado	groundwater
43	GCA_003508135.1	UBA9649	MAG	28894102	PRJNA417962	SAMN08019715	89.92	1.82	14892	170	1.78991	1.95432465413701	17/0	*			8.71x	Omnitrophota	Aquiviventia	Aquiviventales	Aquiviventaceae	Aquivivens	Aquivivens invisus		d__Bacteria;p__Omnitrophota;c__Koll11;o__UBA9649;f__UBA9649;g__UBA9649;s__UBA9649 sp001804415	USA: Rifle, Colorado	groundwater
44	GCA_003528865.1	UBA10172	MAG	28894102	PRJNA417962	SAMN08019104	94.55	0	30494	97	1.65984	1.75551560021153	18/2	*	*	*	11.63x	Omnitrophota	Aquiviventia	Aquiviventales	Aquiviventaceae	Aquivivens	Aquivivens invisus		d__Bacteria;p__Omnitrophota;c__Koll11;o__UBA9649;f__UBA9649;g__UBA9649;s__UBA9649 sp001804415	USA: Rifle, Colorado	groundwater
45		MAG_1639	MAG		PRJNA367387	SAMN06267238	57.32	0	6414	108	0.6391	1.11496859734822	4/2					Omnitrophota	Aquiviventia	Aquiviventales	Aquiviventaceae	MAG-1639	MAG-1639 sp. MAG-1639		d__Bacteria;p__Omnitrophota;c__Koll11;o__UBA9649;f__UBA9649;g__;s__	USA: Beatty, Nevada	geothermal spring
46		MAG_1650	MAG		PRJNA367387	SAMN06267238	61.24	7.05	6983	123	0.81551	1.23778011920314	11/0	*				Omnitrophota	Aquiviventia	Aquiviventales	Aquiviventaceae	MAG-1639	MAG-1639 sp. MAG-1650		d__Bacteria;p__Omnitrophota;c__Koll11;o__UBA9649;f__UBA9649;g__;s__	USA: Beatty, Nevada	geothermal spring
47		SAG_3300010840	SAG	33013724	PRJNA444511		40.2	0	12202	88	0.775984	-	14/1		*	*		Omnitrophota	Aquiviventia	Aquiviventales	Aquiviventaceae	MAG-1639	MAG-1639 sp. SAG-3300010840		d__Bacteria;p__Omnitrophota;c__Koll11;o__UBA9649;f__UBA9649;g__;s__	USA: Beatty, Nevada	groundwater
48		SAG_3300015271	SAG		PRJNA404882	SAMN07630210	32.07	0	8549	69	0.452809	-	5/0		*	*		Omnitrophota	Aquiviventia	Aquiviventales	Aquiviventaceae	MAG-1639	MAG-1639 sp. SAG-3300015271		d__Bacteria;p__Omnitrophota;c__Koll11;o__UBA9649;f__;g__;s__	USA: Nevada	geothermal spring
49		SAG_3300016085	SAG	33013724	PRJNA404553	SAMN07630490	18.68	0	13362	59	0.558501	-	9/1	*	*	*		Omnitrophota	Aquiviventia	Aquiviventales	Aquiviventaceae	MAG-1639	MAG-1639 sp. SAG-3300016085		d__Bacteria;p__Omnitrophota;c__Koll11;o__UBA9649;f__UBA9649;g__;s__	USA: Nevada	groundwater
50		SAG_3300016430	SAG	33013724	PRJNA406491	SAMN07631751	58.18	0	18609	100	1.1668	2.00550017188037	14/0	*	*	*		Omnitrophota	Aquiviventia	Aquiviventales	Aquiviventaceae	SAG-3300016430	SAG-3300016430 sp. SAG-3300016430		d__Bacteria;p__Omnitrophota;c__Koll11;o__UBA9649;f__UBA9649;g__;s__	USA: Nevada	groundwater
51		IMG_2713897465	SAG	33013724			18.35	0	12299	52	0.41724	-	11/0	*	*	*		Omnitrophota	Aquiviventia	Aquiviventales	Aquiviventaceae	SBAZ01	SBAZ01 sp. IMG-2713897465		d__Bacteria;p__Omnitrophota;c__Koll11;o__UBA9649;f__UBA9649;g__;s__	USA: Cold Creek Source, Nevada	groundwater
52		SAG_3300015125	SAG	33013724	PRJNA404668	SAMN07630154	36.78	0	14386	53	0.516716	-	12/1	*	*	*		Omnitrophota	Aquiviventia	Aquiviventales	Aquiviventaceae	SBAZ01	SBAZ01 sp. SAG-3300015125		d__Bacteria;p__Omnitrophota;c__Koll11;o__UBA9649;f__UBA9649;g__2-02-FULL-67-20;s__	USA: Nevada	water
53		SAG_3300016377	SAG	33013724	PRJNA406520	SAMN07630133	55.21	3.64	12841	97	0.83214	1.45236389059953	16/0	*	*	*		Omnitrophota	Aquiviventia	Aquiviventales	Aquiviventaceae	SBAZ01	SBAZ01 sp. SAG-3300016377		d__Bacteria;p__Omnitrophota;c__Koll11;o__UBA9649;f__UBA9649;g__SBAZ01;s__	USA: Nevada	groundwater
54	GCA_005239935.1	Bin_23_1_1	MAG	30674352	PRJNA414404	SAMN08774411	95.45	1.82	14678	156	1.62981	1.6764247857517	19/2				30x	Omnitrophota	Aquiviventia	Aquiviventales	Aquiviventaceae	SBAZ01	SBAZ01 sp005239935		d__Bacteria;p__Omnitrophota;c__Koll11;o__UBA9649;f__UBA9649;g__SBAZ01;s__SBAZ01 sp005239935	Italy: Trento, Comano Thermal Spring	groundwater
55		MAG_1617	MAG		PRJNA367387	SAMN06267238	98.18	0	19556	113	1.33897	1.36378692198004	19/1		*	*		Omnitrophota	Aquiviventia	Aquiviventales	MAG-1617	MAG-1617	MAG-1617 sp. MAG-1617		d__Bacteria;p__Omnitrophota;c__Koll11;o__UBA9649;f__;g__;s__	USA: Beatty, Nevada	geothermal spring
56		IMG_2713897467	SAG	33013724			20	0	10634	95	0.681026	-	11/0	*	*	*		Omnitrophota	Aquiviventia	Aquiviventia ord.	Aquiviventia ord. fam.	Aquiviventia ord. fam. gen.	Aquiviventia ord. fam. gen. sp. IMG-2713897467		d__Bacteria;p__Omnitrophota;c__Koll11;o__1-14-0-20-64-10;f__;g__;s__	USA: Crystal Spring, Nevada, USA	groundwater
57	GCA_003645745.1	B26_G9	MAG	31015394	PRJNA362212	SAMN09215260	89.09	0.17	7703	244	1.62778	1.82401366292513	17/0		*	*	17.01x	Omnitrophota	Incertae-sedis	B26-G9	B26-G9	B26-G9	B26-G9 sp003645745		d__Bacteria;p__Omnitrophota;c__Koll11;o__B26-G9;f__B26-G9;g__B26-G9;s__B26-G9 sp003645745	Mexico: Guaymas Basin, Gulf of California	saline sediment
58		DG02_5.bins.26.Tibie	MAG				93.88	0.91	16421	181	2.26494	2.39064124467405	20/1					Omnitrophota	Incertae-sedis	B26-G9	DG02-5-26	DG02-5-26	DG02-5-26 sp. DG02-5-26		d__Bacteria;p__Omnitrophota;c__Koll11;o__B26-G9;f__;g__;s__	China:Tengchong	geothermal spring
59		MAG_0119	MAG		PRJNA367361	SAMN06267035	57.27	3.64	5292	165	0.865442	1.45615489994762	12/1					Omnitrophota	Incertae-sedis	MAG-0140	MAG-0140	MAG-0140	MAG-0140 sp. MAG-0119		d__Bacteria;p__Omnitrophota;c__Koll11;o__;f__;g__;s__	Netherlands	wastewater
60		MAG_0140	MAG		PRJNA367361	SAMN06267035	77.85	3.09	9443	253	1.97067	2.45314749890816	19/0	*	*	*		Omnitrophota	Incertae-sedis	MAG-0140	MAG-0140	MAG-0140	MAG-0140 sp. MAG-0140		d__Bacteria;p__Omnitrophota;c__Koll11;o__;f__;g__;s__	Netherlands	wastewater
61	GCA_013626165.1	Unc6	MAG	30619209	PRJNA351917	SAMN06718446	98.93	0	98468	22	1.27361	1.28739007378955	20/0	*	*	*	30.0x	Omnitrophota	Incertae-sedis	Velesiimonadales	Velesiimonadaceae	Velesiimonas	Velesiimonas alkalicola	Yes	d__Bacteria;p__Omnitrophota;c__Koll11;o__NDHX01;f__NDHX01;g__NDHX01;s__NDHX01 sp013626165	USA: California, The Cedars highly alkaline spring	groundwater
62	GCA_002322955.1	UBA1560	MAG	28894102	PRJNA348753	SAMN06456190	80	0	31868	50	1.23224	1.5402975	16/0				36.19x	Omnitrophota	Makaraimicrobia	Aquitaenarimonadales	Aquitaenarimonadaceae	Aquitaenarimonas	Aquitaenarimonas noxiae		d__Bacteria;p__Omnitrophota;c__Koll11;o__UBA1560_A;f__0-14-0-80-42-15;g__0-14-0-80-42-15;s__0-14-0-80-42-15 sp002780005	USA: Crystal Geyser near Green River, Utah	water
63	GCA_002780005.1	CG07_land_8_20_14_0_80_42_15	MAG	29379208	PRJNA362739	SAMN06659248	98.18	0	38451	81	1.9305	1.96629150539825	18/0	*	*	*	N/A	Omnitrophota	Makaraimicrobia	Aquitaenarimonadales	Aquitaenarimonadaceae	Aquitaenarimonas	Aquitaenarimonas noxiae	Yes	d__Bacteria;p__Omnitrophota;c__Koll11;o__UBA1560_A;f__0-14-0-80-42-15;g__0-14-0-80-42-15;s__0-14-0-80-42-15 sp002780005	USA: Utah, Grand County	groundwater
64	GCA_002780005.1*	IMG_2786546441; CG07_land_8_20_14_0_80_42_15	MAG	29379208	PRJNA362739	SAMN06659248	98.18	0	38451	81	1.9305	1.96629150539825	18/0	*	*	*	-	Omnitrophota	Makaraimicrobia	Aquitaenarimonadales	Aquitaenarimonadaceae	Aquitaenarimonas	Aquitaenarimonas noxiae		d__Bacteria;p__Omnitrophota;c__Koll11;o__UBA1560_A;f__0-14-0-80-42-15;g__0-14-0-80-42-15;s__0-14-0-80-42-15 sp002780005	USA: Utah, Grand County	groundwater	Duplicate of GCA_002780005.1
65	GCA_001873045.1	CG1_02_49_10	MAG	27112493, 26837824	PRJNA297582	SAMN04328231	55.23	4.71	7305	143	0.903907	1.55953825873619	15/0				N/A	Omnitrophota	Makaraimicrobia	GCA-001873045-1	GCA-001873045-1	GCA-001873045-1	GCA-001873045-1 sp. GCA-001873045-1		d__Bacteria;p__Omnitrophota;c__Koll11;o__;f__;g__;s__	USA: near Green River, Utah	water
66	GCA_001873045.1*	IMG_2786546450; CG1_02_49_10	MAG	27112493, 26837824	PRJNA297582	SAMN04328231	55.23	4.71	7305	143	0.903907	1.55953825873619	15/0				-	Omnitrophota	Makaraimicrobia	GCA-001873045-1	GCA-001873045-1	GCA-001873045-1	GCA-001873045-1 sp. GCA-001873045-1		d__Bacteria;p__Omnitrophota;c__Koll11;o__;f__;g__;s__	USA: near Green River, Utah	water	Duplicate of GCA_001873045.1
67	GCA_013203355.1	bin.702	MAG	No PMC id.	PRJNA616293	SAMN14944587	94.55	3.8	10685	206	1.57101	1.59842175780011	20/1		*	*	7.55x	Omnitrophota	Makaraimicrobia	JABMQH01	JABMQH01	JABMQH01	JABMQH01 sp013203355		d__Bacteria;p__Omnitrophota;c__Koll11;o__JABMQH01;f__JABMQH01;g__JABMQH01;s__JABMQH01 sp013203355	Canada:Ellesmere Island, Lake A	water
68		QZM4_2.bins.374.Tibie	MAG				42.89	7.54	4960	251	1.164	-	15/0		*	*		Omnitrophota	Makaraimicrobia	JABMQH01	JABMQH01	JABMQH01 gen.	JABMQH01 gen. sp. QZM4-2-374		d__Bacteria;p__Omnitrophota;c__Koll11;o__JABMQH01;f__JABMQH01;g__;s__	China:Tengchong	geothermal spring
69		MAG_0145	MAG		PRJNA367361	SAMN06267035	68.93	1.82	12660	102	0.983062	1.40021800609314	17/1	*				Omnitrophota	Makaraimicrobia	JABMQH01	JABMQH01	SAG-3300015411	SAG-3300015411 sp. MAG-0145		d__Bacteria;p__Omnitrophota;c__Koll11;o__JABMQH01;f__JABMQH01;g__;s__	Netherlands	wastewater
70		SAG_3300015411	SAG	33013724	PRJNA406428	SAMN07631853	56.2	0	19983	82	0.988288	1.75851957295374	16/2					Omnitrophota	Makaraimicrobia	JABMQH01	JABMQH01	SAG-3300015411	SAG-3300015411 sp. SAG-3300015411		d__Bacteria;p__Omnitrophota;c__Koll11;o__JABMQH01;f__JABMQH01;g__;s__	USA: Nevada	water
71	GCA_013202525.1	bin.126	MAG	No PMC id.	PRJNA616293	SAMN14944598	100	0.17	19898	149	1.63586	1.6330750448	18/0				8.35x	Omnitrophota	Makaraimicrobia	JABMRG01	JABMRG01	JABMQS01	JABMQS01 sp013202525		d__Bacteria;p__Omnitrophota;c__Koll11;o__JABMRG01;f__JABMRG01;g__JABMQS01;s__JABMQS01 sp013202525	Canada:Ellesmere Island, Lake A	water
72	GCA_013202935.1	bin.468	MAG	No PMC id.	PRJNA616293	SAMN14944612	98.18	0.36	9261	174	1.24842	1.26698785618252	13/2		*	*	5.31x	Omnitrophota	Makaraimicrobia	JABMRG01	JABMRG01	JABMRG01	JABMRG01 sp013202935		d__Bacteria;p__Omnitrophota;c__Koll11;o__JABMRG01;f__JABMRG01;g__JABMRG01;s__JABMRG01 sp013202935	Canada:Ellesmere Island, Lake A	water
73		3300025586_21	MAG	34707591	PRJNA375651	SAMN06343953	89.29	7.14	14521	180	1.85715	2.0799	20/0	*	*	*		Omnitrophota	Makaraimicrobia	JABMRG01	JABMRG01	Candidatus Orphella	Candidatus Orphella occulta	No	d__Bacteria;p__Omnitrophota;c__Koll11;o__JABMRG01;f__JABMRG01;g__;s__	Antarctica: Ace Lake	water	Not of sufficient quality to pass Bowers et al., 2018 criteria (completeness and contamination)
74	GCA_013202745.1	bin.182	MAG	No PMC id.	PRJNA616293	SAMN14944615	92.07	3.64	11977	195	1.6742	1.75221350537634	15/1		*	*	14.53x	Omnitrophota	Makaraimicrobia	JABMRJ01	JABMRJ01	JABMRJ01	JABMRJ01 sp013202745		d__Bacteria;p__Omnitrophota;c__Koll11;o__JABMRJ01;f__JABMRJ01;g__JABMRJ01;s__JABMRJ01 sp013202745	Canada:Ellesmere Island, Lake A	water
75		SAG_3300016315	SAG	33013724	PRJNA406518	SAMN07631596	31.45	0	18116	70	0.837451	-	8/0	*				Omnitrophota	Makaraimicrobia	JABMRJ01	JABMRJ01 fam.	JABMRJ01 fam. gen.	JABMRJ01 fam. gen. sp. SAG-3300016315		d__Bacteria;p__Omnitrophota;c__Koll11;o__JABMRJ01;f__JABMRJ01;g__;s__	USA: Nevada	groundwater
76	GCA_013202205.1	bin.291	MAG	No PMC id.	PRJNA616293	SAMN14944633	98.18	0.91	33946	94	1.49579	1.50965906039927	17/1		*		13.52x	Omnitrophota	Makaraimicrobia	JABMRJ01	JABMSB01	JABMSB01	JABMSB01 sp013202205		d__Bacteria;p__Omnitrophota;c__Koll11;o__JABMRJ01;f__JABMSB01;g__JABMSB01;s__JABMSB01 sp013202205	Canada:Ellesmere Island, Lake A	water
77	GCA_001303645.1	SM23_29	MAG	26824177	PRJNA270657	SAMN03994195	92.98	46.12	13919	169	2.04325	-	20/3	*			120.0x	Omnitrophota	Makaraimicrobia	Makaraimicrobia ord.	Makaraimicrobia ord. fam.	Makaraimicrobia ord. fam. gen.	Makaraimicrobia ord. fam. gen. sp. GCA-001303645-1		d__Bacteria;p__Omnitrophota;c__Koll11;o__UBA6215;f__UBA6215;g__;s__	USA: White Oak River estuary, North Carolina	saline sediment
78		SAG_3300010843	SAG	33013724	PRJNA444553		48.33	0	13226	113	0.915869	-	15/2					Omnitrophota	Makaraimicrobia	Makaraimicrobia ord.	Makaraimicrobia ord. fam.	Makaraimicrobia ord. fam. gen.	Makaraimicrobia ord. fam. gen. sp. SAG-3300010843		d__Bacteria;p__Omnitrophota;c__Koll11;o__CG1-02-43-210;f__CG1-02-43-210;g__;s__	USA: Sanford underground research facility (SURF), Lead, South Dakota	groundwater
79		SAG_3300015398	SAG	33013724	PRJNA406396	SAMN07631823	40.12	0	12195	97	0.792257	-	11/0		*			Omnitrophota	Makaraimicrobia	Makaraimicrobia ord.	Makaraimicrobia ord. fam.	Makaraimicrobia ord. fam. gen.	Makaraimicrobia ord. fam. gen. sp. SAG-3300015398		d__Bacteria;p__Omnitrophota;c__Koll11;o__UBA10183;f__;g__;s__	USA: Nevada	water
80	GCA_001804065.1	RIFCSPHIGHO2_02_FULL_46_20	MAG	29364876, 27774985, 26844018, 28077884	PRJNA288027	SAMN04315404	96.36	0	16571	92	1.31247	1.36204649232046	17/0				N/A	Omnitrophota	Makaraimicrobia	Makaraimicrobiales	2-01-FULL-45-10	2-01-FULL-45-10	2-01-FULL-45-10 sp001804065		d__Bacteria;p__Omnitrophota;c__Koll11;o__UBA1560;f__2-01-FULL-45-10;g__2-01-FULL-45-10;s__2-01-FULL-45-10 sp001804065	USA: Rifle, Colorado	soil
81	GCA_001804255.1	RIFCSPLOWO2_02_FULL_45_16	MAG	29364876, 27774985, 26844018, 28077885	PRJNA288027	SAMN04316061	94.55	0	21223	80	1.35832	1.43661977789529	18/0				N/A	Omnitrophota	Makaraimicrobia	Makaraimicrobiales	2-01-FULL-45-10	2-01-FULL-45-10	2-01-FULL-45-10 sp001804065		d__Bacteria;p__Omnitrophota;c__Koll11;o__UBA1560;f__2-01-FULL-45-10;g__2-01-FULL-45-10;s__2-01-FULL-45-10 sp001804065	USA: Rifle, Colorado	groundwater
82	GCA_001804305.1	RIFCSPLOWO2_12_FULL_45_13	MAG	29364876, 27774985, 26844018, 28077886	PRJNA288027	SAMN04315824	89.09	0	17841	84	1.28991	1.44787405993939	18/0		*	*	N/A	Omnitrophota	Makaraimicrobia	Makaraimicrobiales	2-01-FULL-45-10	2-01-FULL-45-10	2-01-FULL-45-10 sp001804065		d__Bacteria;p__Omnitrophota;c__Koll11;o__UBA1560;f__2-01-FULL-45-10;g__2-01-FULL-45-10;s__2-01-FULL-45-10 sp001804065	USA: Rifle, Colorado	soil
83	GCA_001805365.1	RIFCSPLOWO2_01_FULL_45_24	MAG	29364876, 27774985, 26844018, 28077887	PRJNA288027	SAMN04316204	94.55	0	20297	87	1.33392	1.41080803807509	16/0		*	*	N/A	Omnitrophota	Makaraimicrobia	Makaraimicrobiales	2-01-FULL-45-10	2-01-FULL-45-10	2-01-FULL-45-10 sp001804065		d__Bacteria;p__Omnitrophota;c__Koll11;o__UBA1560;f__2-01-FULL-45-10;g__2-01-FULL-45-10;s__2-01-FULL-45-10 sp001804065	USA: Rifle, Colorado	groundwater
84	GCA_001804165.1	RIFCSPLOWO2_01_FULL_45_10	MAG	29364876, 27774985, 26844018, 28077888	PRJNA288027	SAMN04315140	93.88	0	30754	64	1.43378	1.5272432893055	19/2	*			N/A	Omnitrophota	Makaraimicrobia	Makaraimicrobiales	2-01-FULL-45-10	2-01-FULL-45-10-A	2-01-FULL-45-10-A sp001804165		d__Bacteria;p__Omnitrophota;c__Koll11;o__UBA1560;f__2-01-FULL-45-10;g__2-01-FULL-45-10-A;s__2-01-FULL-45-10-A sp001804165	USA: Rifle, Colorado	groundwater
85		QZM4_2.bins.201.Tibie	MAG				94.55	0	442820	5	1.56051	1.65046113167636	20/0		*	*		Omnitrophota	Makaraimicrobia	Makaraimicrobiales	2-01-FULL-45-10	CAIMPC01	CAIMPC01 sp. QZM4-2-201		d__Bacteria;p__Omnitrophota;c__Koll11;o__UBA1560;f__2-01-FULL-45-10;g__CAIMPC01;s__	China: Tengchong	geothermal spring
86		QZM4_3.bins.199.Tibie	MAG				67.21	0	6930	180	1.11373	1.65708823091802	17/0					Omnitrophota	Makaraimicrobia	Makaraimicrobiales	2-01-FULL-45-10	CAIMPC01	CAIMPC01 sp. QZM4-2-201		d__Bacteria;p__Omnitrophota;c__Koll11;o__UBA1560;f__2-01-FULL-45-10;g__CAIMPC01;s__	China: Tengchong	geothermal spring
87	GCA_903843285.1	AM5_bin-0158	MAG	33990618	PRJEB38681	SAMEA6944500	100	1.82	61129	73	1.95572	1.9201298232	20/1	*			N/A	Omnitrophota	Makaraimicrobia	Makaraimicrobiales	2-01-FULL-45-10	CAIMPC01	CAIMPC01 sp903843285		d__Bacteria;p__Omnitrophota;c__Koll11;o__UBA1560;f__2-01-FULL-45-10;g__CAIMPC01;s__CAIMPC01 sp903843285	Finland	water
88	GCA_903896075.1	AM-lipid-02-D10_bin-1005	MAG	33990618	PRJEB38681	SAMEA6947569	86.03	1.82	5575	366	1.70546	1.94631949831454	-	-	-	-	N/A	Omnitrophota	Makaraimicrobia	Makaraimicrobiales	2-01-FULL-45-10	CAIMPC01	CAIMPC01 sp903843285		d__Bacteria;p__Omnitrophota;c__Koll11;o__UBA1560;f__2-01-FULL-45-10;g__CAIMPC01;s__CAIMPC01 sp903843285	Finland	water
89	GCA_903899255.1	AM-2014-D7_bin-412	MAG	33990618	PRJEB38681	SAMEA6945346	84.08	1.82	5898	353	1.71564	2.00335075594672	-	-	-	-	N/A	Omnitrophota	Makaraimicrobia	Makaraimicrobiales	2-01-FULL-45-10	CAIMPC01	CAIMPC01 sp903843285		d__Bacteria;p__Omnitrophota;c__Koll11;o__UBA1560;f__2-01-FULL-45-10;g__CAIMPC01;s__CAIMPC01 sp903843285	Finland	water
90		MAG_0479	MAG		PRJNA375332	SAMN06343860	94.55	1.82	55893	69	1.88262	1.95490138699101	19/2					Omnitrophota	Makaraimicrobia	Makaraimicrobiales	2-01-FULL-45-10	CAIMPC01	CAIMPC01 sp903843285		d__Bacteria;p__Omnitrophota;c__Koll11;o__UBA1560;f__2-01-FULL-45-10;g__CAIMPC01;s__CAIMPC01 sp903843285	Finland: Lake Alinen Mustajarvi	water
91	GCA_003142795.1	fen_1320	MAG	30013118	PRJNA386568	SAMN08180102	100	1.82	44258	70	1.94032	1.9050071578	19/0		*	*	12.61x	Omnitrophota	Makaraimicrobia	Makaraimicrobiales	2-01-FULL-45-10	FEN-1320	FEN-1320 sp003142795		d__Bacteria;p__Omnitrophota;c__Koll11;o__UBA1560;f__2-01-FULL-45-10;g__FEN-1320;s__FEN-1320 sp003142795	Sweden: Stordalen Mire	soil
92	GCA_003140915.1	fen_1322	MAG	30013118	PRJNA386568	SAMN08180159	76.21	0	10726	128	1.15929	1.52117307439969	14/1				8.86x	Omnitrophota	Makaraimicrobia	Makaraimicrobiales	2-01-FULL-45-10	FEN-1322	FEN-1322 sp003140915		d__Bacteria;p__Omnitrophota;c__Koll11;o__UBA1560;f__2-01-FULL-45-10;g__FEN-1322;s__FEN-1322 sp003140915	Sweden: Stordalen Mire	soil
93	GCA_013202515.1	bin.93	MAG	No PMC id.	PRJNA616293	SAMN14944619	84.36	1.98	6188	356	1.85238	2.15232562328118	16/1			*	6.1x	Omnitrophota	Makaraimicrobia	Makaraimicrobiales	JABMRN01	JABMRN01	JABMRN01 sp013202515		d__Bacteria;p__Omnitrophota;c__Koll11;o__UBA1560;f__JABMRN01;g__JABMRN01;s__JABMRN01 sp013202515	Canada:Ellesmere Island, Lake A	water
94	GCA_003558655.1	CSSed10_423	MAG	30231921	PRJNA434545	SAMN08574609	83	7.27	4470	293	1.31997	1.47470530012048	17/2	*	*	*	10.96x	Omnitrophota	Makaraimicrobia	Makaraimicrobiales	Makaraimicrobiaceae	GCA-003558655-1	GCA-003558655-1 sp. GCA-003558655-1		d__Bacteria;p__Omnitrophota;c__Koll11;o__UBA1560;f__SKK-01;g__;s__	Russia: Kulunda Steppe	saline sediment
95	GCA_013204685.1	bin.644	MAG	No PMC id.	PRJNA616293	SAMN14944634	78.02	0	7982	236	1.58396	2.03019994873109	15/1				8.2x	Omnitrophota	Makaraimicrobia	Makaraimicrobiales	Makaraimicrobiaceae	JABMSC01	JABMSC01 sp013204685		d__Bacteria;p__Omnitrophota;c__Koll11;o__UBA1560;f__SKK-01;g__JABMSC01;s__JABMSC01 sp013204685	Canada:Ellesmere Island, Lake A	water
96		MAG_1467	MAG		PRJNA368343	SAMN06269224	96.36	5.45	20728	123	1.60246	1.57235884651308	18/1		*	*		Omnitrophota	Makaraimicrobia	Makaraimicrobiales	Makaraimicrobiaceae	MAG-1467	MAG-1467 sp. MAG-1467		d__Bacteria;p__Omnitrophota;c__Koll11;o__UBA1560;f__SKK-01;g__;s__	Canada: British Columbia	water
97	GCA_000398085.1	SCGC AAA252-B19	SAG	23851394	PRJNA192327	SAMN02441624	19.5	0	15140	54	0.518969	-	10/0					Omnitrophota	Makaraimicrobia	Makaraimicrobiales	Makaraimicrobiaceae	Makaraimicrobiaceae gen.	Makaraimicrobiaceae gen. sp. GCA-000398085-1		d__Bacteria;p__Omnitrophota;c__Koll11;o__UBA1560;f__SKK-01;g__B134-G9;s__	Canada: Sakinaw Lake (SAK), British Columbia	saline water
98		MAG_1459	MAG		PRJNA368343	SAMN06269224	50.36	0	4994	153	0.795475	1.57957704527403	13/0		*	*		Omnitrophota	Makaraimicrobia	Makaraimicrobiales	Makaraimicrobiaceae	Makaraimicrobiaceae gen.	Makaraimicrobiaceae gen. sp. MAG-1459		d__Bacteria;p__Omnitrophota;c__Koll11;o__UBA1560;f__SKK-01;g__;s__	Canada: British Columbia	water
99		3300035698_848	MAG	34707591	PRJNA33179	Multiple	96.43	1.79	24424	113	1.59251	1.65147	21/2					Omnitrophota	Makaraimicrobia	Makaraimicrobiales	Makaraimicrobiaceae	Candidatus Aadella	Candidatus Aadella gelida	No	d__Bacteria;p__Omnitrophota;c__Koll11;o__UBA1560;f__SKK-01;g__;s__	Antarctica: Ace Lake	water	Although this genome is not the denoted nomenclatural type for the taxon (Williams et al., 2021), this genome was analyzed in all of the associated paper's analyses and represents the more complete genome. Do to the fact that rRNA genes are either missing or severely truncated in the genome, this genome does not pass quality standards under the Bowers et al., 2018 criteria.
100		MAG_1470	MAG		PRJNA368343	SAMN06269224	90.91	1.82	21550	97	1.24896	1.34883401253987	19/0	*	*	*		Omnitrophota	Makaraimicrobia	Makaraimicrobiales	Makaraimicrobiaceae	Makaraimicrobium	Makaraimicrobium sp. MAG-1470		d__Bacteria;p__Omnitrophota;c__Koll11;o__UBA1560;f__SKK-01;g__B134-G9;s__	Canada: British Columbia	water
101	GCA_003644505.1	B134_G9	MAG	31015394	PRJNA362212	SAMN09215259	100	4.36	25046	170	2.11854	2.026166874	17/1	*	*	*	34.22x	Omnitrophota	Makaraimicrobia	Makaraimicrobiales	Makaraimicrobiaceae	Makaraimicrobium	Makaraimicrobium thalassicum	Yes	d__Bacteria;p__Omnitrophota;c__Koll11;o__UBA1560;f__SKK-01;g__B134-G9;s__B134-G9 sp003644505	Mexico: Guaymas Basin, Gulf of California	saline sediment
102		3300035698_1097	MAG	34707591	PRJNA33179	Multiple	98.21	1.79	34670	96	2.02542	2.06233	21/2	*	*	*		Omnitrophota	Makaraimicrobia	Makaraimicrobiales	Makaraimicrobiaceae	Candidatus Tantalella	Candidatus Tantalella remota	No	d__Bacteria;p__Omnitrophota;c__Koll11;o__UBA1560;f__SKK-01;g__;s__	Antarctica: Ace Lake	water	Although Williams et al. (2021) report all three rRNA genes as present, none of these genes are present with sufficient length to pass the criteria for recognizing it as a high quality genome.
103	GCA_007135805.1	CSSed165cm_186R1	MAG	31438955	PRJNA453733	SAMN10610396	94.55	0	16823	137	1.62824	1.72209624537282	18/0				11x	Omnitrophota	Makaraimicrobia	Makaraimicrobiales	Makaraimicrobiaceae	SLID01	SLID01 sp007135805		d__Bacteria;p__Omnitrophota;c__Koll11;o__UBA1560;f__SKK-01;g__SLID01;s__SLID01 sp007135805	Russia: Kulunda Steppe	saline sediment
104	GCA_000954095.1	SKK-01	SAG	26060021	PRJNA273957	SAMN03316882	100	4.55	15145	656	3.1459	3.0027625045	21/4	*	*	*	120x	Omnitrophota	Makaraimicrobia	Makaraimicrobiales	Makaraimicrobiaceae	Thioglobulicalix	Thioglobulicalix magnus	Yes	d__Bacteria;p__Omnitrophota;c__Koll11;o__UBA1560;f__SKK-01;g__Omnitrophus_A;s__Omnitrophus_A magneticus	Germany: Lake Chemisee, Bavaria	sediment	Previously given the name Omnitrophus magneticus SKK-01, which conflicts with Omnitrophus fondinae as they do not belong to the same genus. Although high contamination is reported according to CheckM lineage workflow, contamination is mitigated when markers absent from the phylum are omitted.
105	GCA_000954095.1*	IMG_2636416185; SKK-01	SAG	26060021	PRJNA273957	SAMN03316882	100	4.55	15145	651	3.14443	3.001362253	21/4	*	*	*	-	Omnitrophota	Makaraimicrobia	Makaraimicrobiales	Makaraimicrobiaceae	Thioglobulicalix	Thioglobulicalix magnus		d__Bacteria;p__Omnitrophota;c__Koll11;o__UBA1560;f__SKK-01;g__Omnitrophus_A;s__Omnitrophus_A magneticus	Germany: Lake Chemisee, Bavaria	sediment	Duplicate of GCA_000954095.1
106		IMG_2616644935	SAG				9.09	0	13487	28	0.40276	-	3/0					Omnitrophota	Makaraimicrobia	Makaraimicrobiales	Makaraimicrobiales fam.	Makaraimicrobiales fam. gen.	Makaraimicrobiales fam. gen. sp. IMG-2616644935		d__Bacteria;p__Omnitrophota;c__Koll11;o__UBA1560;f__JABMRN01;g__;s__	Greece: Etoliko Lagoon	saline water
107	GCA_013203315.1	bin.346	MAG	No PMC id.	PRJNA616293	SAMN14944589	100	0	74467	32	1.50522	1.505222	20/1			*	24.64x	Omnitrophota	Makaraimicrobia	Makaraimicrobiales	RBG-13-46-9	JABMQJ01	JABMQJ01 sp013203315		d__Bacteria;p__Omnitrophota;c__Koll11;o__UBA1560;f__RBG-13-46-9;g__JABMQJ01;s__JABMQJ01 sp013203315	Canada:Ellesmere Island, Lake A	water
108	GCA_001804045.1	RBG_13_46_9	MAG	29364876, 27774985, 26844018, 28077889	PRJNA288027	SAMN04314093	78.26	0	33304	86	2.04538	2.61356631740353	15/0				N/A	Omnitrophota	Makaraimicrobia	Makaraimicrobiales	RBG-13-46-9	RBG-13-46-9	RBG-13-46-9 sp001804045		d__Bacteria;p__Omnitrophota;c__Koll11;o__UBA1560;f__RBG-13-46-9;g__RBG-13-46-9;s__RBG-13-46-9 sp001804045	USA: Rifle, Colorado	soil
109	GCA_001805545.1	RIFCSPHIGHO2_01_FULL_49_10	MAG	29364876, 27774985, 26844018, 28077890	PRJNA288027	SAMN04315032	80.58	0	12870	93	1.08626	1.34805038471085	14/0	*	*	*	N/A	Omnitrophota	Makaraimicrobia	Pluralincolimonadales	Pluralincolimonadaceae	Pluralincolimonas	2-02-FULL-50-19 sp001805885		d__Bacteria;p__Omnitrophota;c__Koll11;o__UBA6215;f__UBA6215;g__2-02-FULL-50-19;s__2-02-FULL-50-19 sp001805885	USA: Rifle, Colorado	soil
110	GCA_001805805.1	RIFCSPLOWO2_02_FULL_50_19	MAG	29364876, 27774985, 26844018, 28077891	PRJNA288027	SAMN04316031	82.56	0	14387	101	1.25195	1.5164183624031	18/2				N/A	Omnitrophota	Makaraimicrobia	Pluralincolimonadales	Pluralincolimonadaceae	Pluralincolimonas	2-02-FULL-50-19 sp001805885		d__Bacteria;p__Omnitrophota;c__Koll11;o__UBA6215;f__UBA6215;g__2-02-FULL-50-19;s__2-02-FULL-50-19 sp001805885	USA: Rifle, Colorado	groundwater
111	GCA_001805885.1	RIFCSPLOWO2_12_FULL_51_24	MAG	29364876, 27774985, 26844018, 28077892	PRJNA288027	SAMN04315775	78.76	1.82	14637	75	0.925803	1.15407997130523	13/0	*	*	*	N/A	Omnitrophota	Makaraimicrobia	Pluralincolimonadales	Pluralincolimonadaceae	Pluralincolimonas	2-02-FULL-50-19 sp001805885		d__Bacteria;p__Omnitrophota;c__Koll11;o__UBA6215;f__UBA6215;g__2-02-FULL-50-19;s__2-02-FULL-50-19 sp001805885	USA: Rifle, Colorado	soil
112	GCA_903826805.1	I1_bin-376	MAG	33990618	PRJEB38681	SAMEA6945700	95.12	0.53	9741	214	1.45557	1.52213883841463	20/0	*	*	*	N/A	Omnitrophota	Makaraimicrobia	Pluralincolimonadales	Pluralincolimonadaceae	Pluralincolimonas	2-02-FULL-50-19 sp903889135		d__Bacteria;p__Omnitrophota;c__Koll11;o__UBA6215;f__UBA6215;g__2-02-FULL-50-19;s__2-02-FULL-50-19 sp903889135	Canada	water
113	GCA_903889135.1	E3_bin-509	MAG	33990618	PRJEB38681	SAMEA6947757	96.36	1.9	14286	171	1.51122	1.53850547633873	20/0	*	*	*	N/A	Omnitrophota	Makaraimicrobia	Pluralincolimonadales	Pluralincolimonadaceae	Pluralincolimonas	2-02-FULL-50-19 sp903889135		d__Bacteria;p__Omnitrophota;c__Koll11;o__UBA6215;f__UBA6215;g__2-02-FULL-50-19;s__2-02-FULL-50-19 sp903889135	Canada	water
114	GCA_003141835.1	fen_1319	MAG	30013118	PRJNA386568	SAMN08180098	99.09	0	208883	11	1.56696	1.58135129680089	20/1	*	*	*	21.27x	Omnitrophota	Makaraimicrobia	Pluralincolimonadales	Pluralincolimonadaceae	Pluralincolimonas	Pluralincolimonas frigidipaludosa	Yes	d__Bacteria;p__Omnitrophota;c__Koll11;o__UBA6215;f__UBA6215;g__2-02-FULL-50-19;s__2-02-FULL-50-19 sp003141835	Sweden: Stordalen Mire	soil
115	GCA_002421665.1	UBA6215	MAG	28894102	PRJNA348753	SAMN06450704	90	0	302165	7	1.60828	1.78698222222222	20/1	*	*	*	84.64x	Omnitrophota	Makaraimicrobia	Pluralincolimonadales	Pluralincolimonadaceae	UBA6215	UBA6215 sp002421665		d__Bacteria;p__Omnitrophota;c__Koll11;o__UBA6215;f__UBA6215;g__UBA6215;s__UBA6215 sp002421665	Canada: Medicine Hat Glauconitic field	wastewater
116	GCA_001872775.1	CG1_02_43_210	MAG	27112493, 26837824	PRJNA297582	SAMN04328245	96.36	0	24053	65	1.28923	1.33792860107929	19/2				N/A	Omnitrophota	Makaraimicrobia	Taenaricolales	Taenaricolaceae	Taenaricola	Taenaricola geyseris		d__Bacteria;p__Omnitrophota;c__Koll11;o__CG1-02-43-210;f__CG1-02-43-210;g__CG1-02-43-210;s__CG1-02-43-210 sp002783585	USA: near Green River, Utah	water
117	GCA_002323155.1	UBA1542	MAG	28894102	PRJNA348753	SAMN06455903	88.29	0	15837	88	1.06327	1.20429040661457	15/1	*		*	174.45x	Omnitrophota	Makaraimicrobia	Taenaricolales	Taenaricolaceae	Taenaricola	Taenaricola geyseris		d__Bacteria;p__Omnitrophota;c__Koll11;o__CG1-02-43-210;f__CG1-02-43-210;g__CG1-02-43-210;s__CG1-02-43-210 sp002783585	USA: Crystal Geyser near Green River, Utah	water
118	GCA_002772935.1	CG10_big_fil_rev_8_21_14_0_10_43_8	MAG	29379208	PRJNA362739	SAMN06659401	80	0.17	10535	95	0.912241	1.138362737875	16/1	*			N/A	Omnitrophota	Makaraimicrobia	Taenaricolales	Taenaricolaceae	Taenaricola	Taenaricola geyseris		d__Bacteria;p__Omnitrophota;c__Koll11;o__CG1-02-43-210;f__CG1-02-43-210;g__CG1-02-43-210;s__CG1-02-43-210 sp002783585	USA: Utah, Grand County	groundwater
119	GCA_002780625.1	CG03_land_8_20_14_0_80_43_22	MAG	29379208	PRJNA362739	SAMN06659197	96.36	0.91	20277	84	1.10726	1.13863212515567	18/2				N/A	Omnitrophota	Makaraimicrobia	Taenaricolales	Taenaricolaceae	Taenaricola	Taenaricola geyseris		d__Bacteria;p__Omnitrophota;c__Koll11;o__CG1-02-43-210;f__CG1-02-43-210;g__CG1-02-43-210;s__CG1-02-43-210 sp002783585	USA: Utah, Grand County	groundwater
120	GCA_002781985.1	CG12_big_fil_rev_8_21_14_0_65_43_15	MAG	29379208	PRJNA362739	SAMN06659560	96.36	0.36	16523	152	1.27447	1.3178506762142	18/2	*	*	*	N/A	Omnitrophota	Makaraimicrobia	Taenaricolales	Taenaricolaceae	Taenaricola	Taenaricola geyseris	Yes	d__Bacteria;p__Omnitrophota;c__Koll11;o__CG1-02-43-210;f__CG1-02-43-210;g__CG1-02-43-210;s__CG1-02-43-210 sp002783585	USA: Utah, Grand County	groundwater
121	GCA_002783585.1	CG_4_8_14_3_um_filter_43_15	MAG	29379208	PRJNA362739	SAMN06659948	94.55	0	17534	91	1.27813	1.35180116340561	19/2	*	*	*	N/A	Omnitrophota	Makaraimicrobia	Taenaricolales	Taenaricolaceae	Taenaricola	Taenaricola geyseris		d__Bacteria;p__Omnitrophota;c__Koll11;o__CG1-02-43-210;f__CG1-02-43-210;g__CG1-02-43-210;s__CG1-02-43-210 sp002783585	USA: Utah	groundwater
122	GCA_002785205.1	CG_4_10_14_0_8_um_filter_43_18	MAG	29379208	PRJNA362739	SAMN06659827	94.55	0	14479	101	1.16805	1.23537387625595	16/0	*	*	*	N/A	Omnitrophota	Makaraimicrobia	Taenaricolales	Taenaricolaceae	Taenaricola	Taenaricola geyseris		d__Bacteria;p__Omnitrophota;c__Koll11;o__CG1-02-43-210;f__CG1-02-43-210;g__CG1-02-43-210;s__CG1-02-43-210 sp002783585	USA: Utah	groundwater
123	GCA_002788595.1	CG_4_9_14_0_2_um_filter_43_12	MAG	29379208	PRJNA362739	SAMN06659986	94.38	0	17525	126	1.24283	1.31683407501589	17/0	*	*	*	N/A	Omnitrophota	Makaraimicrobia	Taenaricolales	Taenaricolaceae	Taenaricola	Taenaricola geyseris		d__Bacteria;p__Omnitrophota;c__Koll11;o__CG1-02-43-210;f__CG1-02-43-210;g__CG1-02-43-210;s__CG1-02-43-210 sp002783585	USA: Utah	groundwater
124	GCA_001872775.1*	IMG_2786546435; CG1_02_43_210	MAG	27112493, 26837824	PRJNA297582	SAMN04328245	96.36	0	24053	65	1.28923	1.33792860107929	19/2				-	Omnitrophota	Makaraimicrobia	Taenaricolales	Taenaricolaceae	Taenaricola	Taenaricola geyseris		d__Bacteria;p__Omnitrophota;c__Koll11;o__CG1-02-43-210;f__CG1-02-43-210;g__CG1-02-43-210;s__CG1-02-43-210 sp002783585	USA: near Green River, Utah	water	Duplicate of GCA_001872775.1
125	GCA_002780625.1*	IMG_2786546443; CG03_land_8_20_14_0_80_43_22	MAG	29379208	PRJNA362739	SAMN06659197	96.36	0.91	20277	84	1.10726	1.13863212515567	18/2				-	Omnitrophota	Makaraimicrobia	Taenaricolales	Taenaricolaceae	Taenaricola	Taenaricola geyseris		d__Bacteria;p__Omnitrophota;c__Koll11;o__CG1-02-43-210;f__CG1-02-43-210;g__CG1-02-43-210;s__CG1-02-43-210 sp002783585	USA: Utah, Grand County	groundwater	Duplicate of GCA_002780625.1
126	GCA_002772935.1*	IMG_2786546447; CG10_big_fil_rev_8_21_14_0_10_43_8	MAG	29379208	PRJNA362739	SAMN06659401	80	0.17	10535	95	0.912241	1.138362737875	16/1	*			-	Omnitrophota	Makaraimicrobia	Taenaricolales	Taenaricolaceae	Taenaricola	Taenaricola geyseris		d__Bacteria;p__Omnitrophota;c__Koll11;o__CG1-02-43-210;f__CG1-02-43-210;g__CG1-02-43-210;s__CG1-02-43-210 sp002783585	USA: Utah, Grand County	groundwater	Duplicate of GCA_002772935.1
127	GCA_002781985.1*	IMG_2786546452; CG12_big_fil_rev_8_21_14_0_65_43_15	MAG	29379208	PRJNA362739	SAMN06659560	96.36	0.36	16523	152	1.27447	1.3178506762142	18/2	*	*	*	-	Omnitrophota	Makaraimicrobia	Taenaricolales	Taenaricolaceae	Taenaricola	Taenaricola geyseris		d__Bacteria;p__Omnitrophota;c__Koll11;o__CG1-02-43-210;f__CG1-02-43-210;g__CG1-02-43-210;s__CG1-02-43-210 sp002783585	USA: Utah, Grand County	groundwater	Duplicate of GCA_002781985.1
128	GCA_002783585.1*	IMG_2786546455; CG_4_8_14_3_um_filter_43_15	MAG	29379208	PRJNA362739	SAMN06659948	94.55	0	17534	91	1.27813	1.35180116340561	19/2	*	*	*	-	Omnitrophota	Makaraimicrobia	Taenaricolales	Taenaricolaceae	Taenaricola	Taenaricola geyseris		d__Bacteria;p__Omnitrophota;c__Koll11;o__CG1-02-43-210;f__CG1-02-43-210;g__CG1-02-43-210;s__CG1-02-43-210 sp002783585	USA: Utah	groundwater	Duplicate of GCA_002783585.1
129	GCA_002785205.1*	IMG_2786546456; CG_4_10_14_0_8_um_filter_43_18	MAG	29379208	PRJNA362739	SAMN06659827	94.55	0	14479	101	1.16805	1.23537387625595	16/0	*	*	*	-	Omnitrophota	Makaraimicrobia	Taenaricolales	Taenaricolaceae	Taenaricola	Taenaricola geyseris		d__Bacteria;p__Omnitrophota;c__Koll11;o__CG1-02-43-210;f__CG1-02-43-210;g__CG1-02-43-210;s__CG1-02-43-210 sp002783585	USA: Utah	groundwater	Duplicate of GCA_002785205.1
130	GCA_002788595.1*	IMG_2786546458; CG_4_9_14_0_2_um_filter_43_12	MAG	29379208	PRJNA362739	SAMN06659986	94.38	0	17525	125	1.24178	1.31572367026912	17/0	*	*	*	-	Omnitrophota	Makaraimicrobia	Taenaricolales	Taenaricolaceae	Taenaricola	Taenaricola geyseris		d__Bacteria;p__Omnitrophota;c__Koll11;o__CG1-02-43-210;f__CG1-02-43-210;g__CG1-02-43-210;s__CG1-02-43-210 sp002783585	USA: Utah	groundwater	Duplicate of GCA_002788595.1
131	GCA_013202925.1	bin.352	MAG	No PMC id.	PRJNA616293	SAMN14944606	90.91	4.88	10254	143	1.13945	1.1922121702783	16/2		*	*	129.84x	Omnitrophota	Makaraimicrobia	UBA10183	UBA10183	Candidatus Gorgyraea	Candidatus Gorgyraea sp013202925		d__Bacteria;p__Omnitrophota;c__Koll11;o__UBA10183;f__UBA10183;g__JABMRA01;s__JABMRA01 sp013202925	Canada:Ellesmere Island, Lake A	water	Have AAI of 71.56% compared to Gorgyraea atricola
132		3300035698_32	MAG	34707591	PRJNA33179	Multiple	98.21	0	119273	30	1.74416	1.77595	19/0	*	*	*		Omnitrophota	Makaraimicrobia	UBA10183	UBA10183	Candidatus Gorgyraea	Candidatus Gorgyraea atricola	No	d__Bacteria;p__Omnitrophota;c__Koll11;o__UBA10183;f__UBA10183;g__;s__	Antarctica: Ace Lake	water	Although Williams et al. (2021) report all three rRNA genes as present, rRNA genes of sufficient length are present for the genome to pass QC.
133	GCA_001871815.1	CG1_02_40_15	MAG	27112493, 26837824	PRJNA297582	SAMN04328226	78.02	1.82	17325	92	1.169	1.47106786131761	15/4	*			N/A	Omnitrophota	Makaraimicrobia	UBA10183	UBA10183	UBA10183	UBA10183 sp001871815		d__Bacteria;p__Omnitrophota;c__Koll11;o__UBA10183;f__UBA10183;g__UBA10183;s__UBA10183 sp001871815	USA: near Green River, Utah	water
134	GCA_001871815.1*	IMG_2786546437; CG1_02_40_15	MAG	27112493, 26837824	PRJNA297582	SAMN04328226	78.02	1.82	17325	92	1.169	1.47106786131761	15/2	*			-	Omnitrophota	Makaraimicrobia	UBA10183	UBA10183	UBA10183	UBA10183 sp001871815		d__Bacteria;p__Omnitrophota;c__Koll11;o__UBA10183;f__UBA10183;g__UBA10183;s__UBA10183 sp001871815	USA: near Green River, Utah	water	Duplicate of GCA_001871815.1
135	GCA_002771475.1	CG22_combo_CG10-13_8_21_14_all_43_16	MAG	29379208	PRJNA362739	SAMN06659642	91.82	0	20561	92	1.22616	1.33539533870616	19/0	*	*	*	N/A	Omnitrophota	Makaraimicrobia	UBA10183	UBA10183	UBA10183	UBA10183 sp002771475		d__Bacteria;p__Omnitrophota;c__Koll11;o__UBA10183;f__UBA10183;g__UBA10183;s__UBA10183 sp002771475	USA: Utah, Grand County	groundwater
136	GCA_002788535.1	CG_4_9_14_0_2_um_filter_42_8	MAG	29379208	PRJNA362739	SAMN06659985	96.2	3.97	4916	365	1.35138	1.34898791351351	17/0				N/A	Omnitrophota	Makaraimicrobia	UBA10183	UBA10183	UBA10183	UBA10183 sp002771475		d__Bacteria;p__Omnitrophota;c__Koll11;o__UBA10183;f__UBA10183;g__UBA10183;s__UBA10183 sp002771475	USA: Utah	groundwater
137	GCA_002771475.1*	IMG_2786546428; CG22_combo_CG10-13_8_21_14_all_43_16	MAG	29379208	PRJNA362739	SAMN06659642	91.82	0	20561	92	1.22616	1.33539533870616	19/0	*	*	*	-	Omnitrophota	Makaraimicrobia	UBA10183	UBA10183	UBA10183	UBA10183 sp002771475		d__Bacteria;p__Omnitrophota;c__Koll11;o__UBA10183;f__UBA10183;g__UBA10183;s__UBA10183 sp002771475	USA: Utah, Grand County	groundwater	Duplicate of GCA_002771475.1
138	GCA_002788535.1*	IMG_2786546457; CG_4_9_14_0_2_um_filter_42_8	MAG	29379208	PRJNA362739	SAMN06659985	96.2	3.97	4916	365	1.35138	1.34898791351351	17/0				-	Omnitrophota	Makaraimicrobia	UBA10183	UBA10183	UBA10183	UBA10183 sp002771475		d__Bacteria;p__Omnitrophota;c__Koll11;o__UBA10183;f__UBA10183;g__UBA10183;s__UBA10183 sp002771475	USA: Utah	groundwater	Duplicate of GCA_002788535.1
139	GCA_002780805.1	CG02_land_8_20_14_3_00__42_8	MAG	29379208	PRJNA362739	SAMN06659178	79.82	1.82	7436	152	1.13943	1.40152134502631	15/0				N/A	Omnitrophota	Makaraimicrobia	UBA10183	UBA10183	UBA10183	UBA10183 sp002780805		d__Bacteria;p__Omnitrophota;c__Koll11;o__UBA10183;f__UBA10183;g__UBA10183;s__UBA10183 sp002780805	USA: Utah, Grand County	groundwater
140	GCA_002781945.1	CG12_big_fil_rev_8_21_14_0_65_42_8	MAG	29379208	PRJNA362739	SAMN06659559	82.98	0	3782	443	1.34208	1.61735478428537	12/0				N/A	Omnitrophota	Makaraimicrobia	UBA10183	UBA10183	UBA10183	UBA10183 sp002780805		d__Bacteria;p__Omnitrophota;c__Koll11;o__UBA10183;f__UBA10183;g__UBA10183;s__UBA10183 sp002780805	USA: Utah, Grand County	groundwater
141	GCA_002781945.1*	IMG_2786546434; CG12_big_fil_rev_8_21_14_0_65_42_8	MAG	29379208	PRJNA362739	SAMN06659559	82.98	0	3782	440	1.33903	1.61367317425886	12/0				-	Omnitrophota	Makaraimicrobia	UBA10183	UBA10183	UBA10183	UBA10183 sp002780805		d__Bacteria;p__Omnitrophota;c__Koll11;o__UBA10183;f__UBA10183;g__UBA10183;s__UBA10183 sp002780805	USA: Utah, Grand County	groundwater	Duplicate of GCA_002781945.1
142	GCA_002780805.1*	IMG_2786546444; CG02_land_8_20_14_3_00__42_8	MAG	29379208	PRJNA362739	SAMN06659178	79.82	1.82	7436	152	1.13943	1.40152134502631	15/0				-	Omnitrophota	Makaraimicrobia	UBA10183	UBA10183	UBA10183	UBA10183 sp002780805		d__Bacteria;p__Omnitrophota;c__Koll11;o__UBA10183;f__UBA10183;g__UBA10183;s__UBA10183 sp002780805	USA: Utah, Grand County	groundwater	Duplicate of GCA_002780805.1
143	GCA_001803975.1	GWA2_41_15	MAG	29364876, 27774985, 26844018, 28077893	PRJNA288027	SAMN04314168	70.91	0	102868	24	1.056	1.4892130870117	16/1		*	*	N/A	Omnitrophota	Makaraimicrobia	UBA10183	UBA10183	UBA10183	UBA10183 sp003485765		d__Bacteria;p__Omnitrophota;c__Koll11;o__UBA10183;f__UBA10183;g__UBA10183;s__UBA10183 sp003485765	USA: Rifle, Colorado	soil
144	GCA_003485765.1	UBA10183	MAG	28894102	PRJNA417962	SAMN08018445	97.19	2.73	53507	60	1.78966	1.79113312274925	17/2		*		10.79x	Omnitrophota	Makaraimicrobia	UBA10183	UBA10183	UBA10183	UBA10183 sp003485765		d__Bacteria;p__Omnitrophota;c__Koll11;o__UBA10183;f__UBA10183;g__UBA10183;s__UBA10183 sp003485765	USA: Rifle, Colorado	groundwater
145	GCA_001804055.1	RIFCSPHIGHO2_02_FULL_46_11	MAG	29364876, 27774985, 26844018, 28077894	PRJNA288027	SAMN04315388	90.91	1.82	37256	75	1.79055	1.93374425145749	19/0	*			N/A	Omnitrophota	Omnitrophia	Omnitrophales	01-FULL-45-10b	01-FULL-45-10b	01-FULL-45-10b sp001804205		d__Bacteria;p__Omnitrophota;c__Omnitrophia;o__Omnitrophales;f__01-FULL-45-10b;g__01-FULL-45-10b;s__01-FULL-45-10b sp001804205	USA: Rifle, Colorado	soil
146	GCA_001804205.1	RIFCSPLOWO2_01_FULL_45_10b	MAG	29364876, 27774985, 26844018, 28077895	PRJNA288027	SAMN04315234	97.27	0	32265	75	1.84359	1.89533257941811	20/2	*	*	*	N/A	Omnitrophota	Omnitrophia	Omnitrophales	01-FULL-45-10b	01-FULL-45-10b	01-FULL-45-10b sp001804205		d__Bacteria;p__Omnitrophota;c__Omnitrophia;o__Omnitrophales;f__01-FULL-45-10b;g__01-FULL-45-10b;s__01-FULL-45-10b sp001804205	USA: Rifle, Colorado	groundwater
147		SAG_3300015405	SAG	33013724	PRJNA406421	SAMN07631846	41.65	0	12811	94	0.821324	-	10/0	*	*	*		Omnitrophota	Omnitrophia	Omnitrophales	01-FULL-45-10b	01-FULL-45-10b gen.	01-FULL-45-10b gen. sp. SAG-3300015405		d__Bacteria;p__Omnitrophota;c__Omnitrophia;o__Omnitrophales;f__01-FULL-45-10b;g__01-FULL-45-10b;s__	USA: Nevada	water
148	GCA_001804105.1	RIFCSPHIGHO2_02_FULL_49_9	MAG	29364876, 27774985, 26844018, 28077896	PRJNA288027	SAMN04316140	73.39	0	7951	90	0.724153	0.986718899032566	15/0				N/A	Omnitrophota	Omnitrophia	Omnitrophales	01-FULL-45-10b	2-01-FULL-50-24	2-01-FULL-50-24 sp001804225		d__Bacteria;p__Omnitrophota;c__Omnitrophia;o__Omnitrophales;f__01-FULL-45-10b;g__2-01-FULL-50-24;s__2-01-FULL-50-24 sp001804225	USA: Rifle, Colorado	soil
149	GCA_001804225.1	RIFCSPLOWO2_01_FULL_50_24	MAG	29364876, 27774985, 26844018, 28077897	PRJNA288027	SAMN04315226	86.36	1.82	20120	82	1.20078	1.36513514705882	16/0	*	*	*	N/A	Omnitrophota	Omnitrophia	Omnitrophales	01-FULL-45-10b	2-01-FULL-50-24	2-01-FULL-50-24 sp001804225		d__Bacteria;p__Omnitrophota;c__Omnitrophia;o__Omnitrophales;f__01-FULL-45-10b;g__2-01-FULL-50-24;s__2-01-FULL-50-24 sp001804225	USA: Rifle, Colorado	groundwater
150	GCA_001804315.1	RIFCSPLOWO2_12_FULL_50_11	MAG	29364876, 27774985, 26844018, 28077898	PRJNA288027	SAMN04315875	97.27	0	27452	107	2.23535	2.29808676878791	20/2		*	*	N/A	Omnitrophota	Omnitrophia	Omnitrophales	01-FULL-45-10b	2-12-FULL-50-11-A	2-12-FULL-50-11-A sp001804315		d__Bacteria;p__Omnitrophota;c__Omnitrophia;o__Omnitrophales;f__01-FULL-45-10b;g__2-12-FULL-50-11-A;s__2-12-FULL-50-11-A sp001804315	USA: Rifle, Colorado	soil
151	GCA_002781965.1	CG12_big_fil_rev_8_21_14_0_65_45_16	MAG	29379208	PRJNA362739	SAMN06659561	100	0	43029	114	2.53529	2.535288	18/0	*	*	*	N/A	Omnitrophota	Omnitrophia	Omnitrophales	Abzuiibacteriaceae	Abzuiibacterium	Abzuiibacterium crystallinum		d__Bacteria;p__Omnitrophota;c__Omnitrophia;o__Omnitrophales;f__1-14-0-20-45-26;g__1-14-0-20-45-26;s__1-14-0-20-45-26 sp002787155	USA: Utah, Grand County	groundwater
152	GCA_002787155.1	CG11_big_fil_rev_8_21_14_0_20_45_26	MAG	29379208	PRJNA362739	SAMN06659523	100	0	69843	76	2.47733	2.477334	20/2	*	*	*	N/A	Omnitrophota	Omnitrophia	Omnitrophales	Abzuiibacteriaceae	Abzuiibacterium	Abzuiibacterium crystallinum	Yes	d__Bacteria;p__Omnitrophota;c__Omnitrophia;o__Omnitrophales;f__1-14-0-20-45-26;g__1-14-0-20-45-26;s__1-14-0-20-45-26 sp002787155	USA: Utah, Grand County	groundwater
153	GCA_002781965.1*	IMG_2786546430; CG12_big_fil_rev_8_21_14_0_65_45_16	MAG	29379208	PRJNA362739	SAMN06659561	100	0	43029	114	2.53529	2.535288	18/0	*	*	*	-	Omnitrophota	Omnitrophia	Omnitrophales	Abzuiibacteriaceae	Abzuiibacterium	Abzuiibacterium crystallinum		d__Bacteria;p__Omnitrophota;c__Omnitrophia;o__Omnitrophales;f__1-14-0-20-45-26;g__1-14-0-20-45-26;s__1-14-0-20-45-26 sp002787155	USA: Utah, Grand County	groundwater	Duplicate of GCA_002781965.1
154	GCA_002787155.1*	IMG_2786546440; CG11_big_fil_rev_8_21_14_0_20_45_26	MAG	29379208	PRJNA362739	SAMN06659523	100	0	69843	76	2.47733	2.477334	20/2	*	*	*	-	Omnitrophota	Omnitrophia	Omnitrophales	Abzuiibacteriaceae	Abzuiibacterium	Abzuiibacterium crystallinum		d__Bacteria;p__Omnitrophota;c__Omnitrophia;o__Omnitrophales;f__1-14-0-20-45-26;g__1-14-0-20-45-26;s__1-14-0-20-45-26 sp002787155	USA: Utah, Grand County	groundwater	Duplicate of GCA_002787155.1
155	GCA_903819555.1	AM5_bin-0560	MAG	33990618	PRJEB38681	SAMEA6946517	87.27	0	102308	40	2.05694	2.35697948894236	-	-	-	-	N/A	Omnitrophota	Omnitrophia	Omnitrophales	Aquincolibacteriaceae	Aquincolibacterium	Aquincolibacterium lacustre		d__Bacteria;p__Omnitrophota;c__Omnitrophia;o__Omnitrophales;f__UBA2337;g__XYB12-FULL-50-7;s__XYB12-FULL-50-7 sp903856085	Finland	water
156	GCA_903836045.1	AM-2014-D7_bin-249	MAG	33990618	PRJEB38681	SAMEA6945340	100	6.53	117773	47	2.43631	2.2772170876	-	-	-	-	N/A	Omnitrophota	Omnitrophia	Omnitrophales	Aquincolibacteriaceae	Aquincolibacterium	Aquincolibacterium lacustre		d__Bacteria;p__Omnitrophota;c__Omnitrophia;o__Omnitrophales;f__UBA2337;g__XYB12-FULL-50-7;s__XYB12-FULL-50-7 sp903856085	Finland	water
157	GCA_903856085.1	AM-2014-D6_bin-627	MAG	33990618	PRJEB38681	SAMEA6947919	99.09	1.82	86684	50	2.36072	2.3390411522858	20/1	*	*	*	N/A	Omnitrophota	Omnitrophia	Omnitrophales	Aquincolibacteriaceae	Aquincolibacterium	Aquincolibacterium lacustre	Yes	d__Bacteria;p__Omnitrophota;c__Omnitrophia;o__Omnitrophales;f__UBA2337;g__XYB12-FULL-50-7;s__XYB12-FULL-50-7 sp903856085	Finland	water
158		MAG_0475	MAG		PRJNA375332	SAMN06343860	92.73	9.09	149272	33	2.25718	2.2128805739243	21/1			*		Omnitrophota	Omnitrophia	Omnitrophales	Aquincolibacteriaceae	Aquincolibacterium	Aquincolibacterium lacustre		d__Bacteria;p__Omnitrophota;c__Omnitrophia;o__Omnitrophales;f__UBA2337;g__XYB12-FULL-50-7;s__XYB12-FULL-50-7 sp903856085	Finland: Lake Alinen Mustajarvi	water
159	GCA_903819615.1	AM-lipid-02-D7_bin-655	MAG	33990618	PRJEB38681	SAMEA6946903	95.29	2.18	6049	519	2.51177	2.57845677153951	16/0				N/A	Omnitrophota	Omnitrophia	Omnitrophales	Aquincolibacteriaceae	Aquincolibacterium	Aquincolibacterium methanicum		d__Bacteria;p__Omnitrophota;c__Omnitrophia;o__Omnitrophales;f__UBA2337;g__XYB12-FULL-50-7;s__XYB12-FULL-50-7 sp903884815	Finland	water
160	GCA_903826415.1	AM-lipid-01-D10_bin-1041	MAG	33990618	PRJEB38681	SAMEA6945101	85.14	2.73	6104	543	2.69484	3.07878058033827	-	-	-	-	N/A	Omnitrophota	Omnitrophia	Omnitrophales	Aquincolibacteriaceae	Aquincolibacterium	Aquincolibacterium methanicum		d__Bacteria;p__Omnitrophota;c__Omnitrophia;o__Omnitrophales;f__UBA2337;g__XYB12-FULL-50-7;s__XYB12-FULL-50-7 sp903884815	Finland	water
161	GCA_903845605.1	AM5_bin-0380	MAG	33990618	PRJEB38681	SAMEA6944506	100	1.82	116372	45	2.72009	2.6705833802	20/1			*	N/A	Omnitrophota	Omnitrophia	Omnitrophales	Aquincolibacteriaceae	Aquincolibacterium	Aquincolibacterium methanicum		d__Bacteria;p__Omnitrophota;c__Omnitrophia;o__Omnitrophales;f__UBA2337;g__XYB12-FULL-50-7;s__XYB12-FULL-50-7 sp903884815	Finland	water
162	GCA_903869165.1	AM-lipid-02-D10_bin-0774	MAG	33990618	PRJEB38681	SAMEA6947555	100	1.98	31238	172	2.80513	2.7495894062	19/0		*	*	N/A	Omnitrophota	Omnitrophia	Omnitrophales	Aquincolibacteriaceae	Aquincolibacterium	Aquincolibacterium methanicum		d__Bacteria;p__Omnitrophota;c__Omnitrophia;o__Omnitrophales;f__UBA2337;g__XYB12-FULL-50-7;s__XYB12-FULL-50-7 sp903884815	Finland	water
163	GCA_903884815.1	AM-lipid-02-D9_bin-1187	MAG	33990618	PRJEB38681	SAMEA6945319	100	2.73	62682	80	2.87178	2.7933823514	20/1	*	*	*	N/A	Omnitrophota	Omnitrophia	Omnitrophales	Aquincolibacteriaceae	Aquincolibacterium	Aquincolibacterium methanicum	Yes	d__Bacteria;p__Omnitrophota;c__Omnitrophia;o__Omnitrophales;f__UBA2337;g__XYB12-FULL-50-7;s__XYB12-FULL-50-7 sp903884815	Finland	water
164	GCA_903922645.1	AM-lipid-01-D9_bin-0121	MAG	33990618	PRJEB38681	SAMEA6946260	100	4.71	12246	348	2.8884	2.7523544542	20/2			*	N/A	Omnitrophota	Omnitrophia	Omnitrophales	Aquincolibacteriaceae	Aquincolibacterium	Aquincolibacterium methanicum		d__Bacteria;p__Omnitrophota;c__Omnitrophia;o__Omnitrophales;f__UBA2337;g__XYB12-FULL-50-7;s__XYB12-FULL-50-7 sp903884815	Finland	water
165	GCA_903923935.1	AM-lipid-02-D8_bin-184	MAG	33990618	PRJEB38681	SAMEA6946588	98.18	4.55	11829	353	2.81392	2.73567983092279	19/2	*	*	*	N/A	Omnitrophota	Omnitrophia	Omnitrophales	Aquincolibacteriaceae	Aquincolibacterium	Aquincolibacterium methanicum		d__Bacteria;p__Omnitrophota;c__Omnitrophia;o__Omnitrophales;f__UBA2337;g__XYB12-FULL-50-7;s__XYB12-FULL-50-7 sp903884815	Finland	water
166		MAG_0490	MAG		PRJNA375332	SAMN06343860	56.36	3.64	20076	122	1.80875	3.09246527182399	15/0			*		Omnitrophota	Omnitrophia	Omnitrophales	Aquincolibacteriaceae	Aquincolibacterium	Aquincolibacterium methanicum		d__Bacteria;p__Omnitrophota;c__Omnitrophia;o__Omnitrophales;f__UBA2337;g__XYB12-FULL-50-7;s__XYB12-FULL-50-7 sp903884815	Finland: Lake Alinen Mustajarvi	water
167		MAG_0395	MAG		PRJNA375332	SAMN06343860	65.45	1.16	8877	253	1.7972	2.71406032085561	13/1		*	*		Omnitrophota	Omnitrophia	Omnitrophales	Aquincolibacteriaceae	Aquincolibacterium	Aquincolibacterium sp. MAG-0395		d__Bacteria;p__Omnitrophota;c__Omnitrophia;o__Omnitrophales;f__UBA2337;g__XYB12-FULL-50-7;s__	Finland: Lake Alinen Mustajarvi	water
168		MAG_0488	MAG		PRJNA375332	SAMN06343860	49.09	3.64	16917	124	1.51444	-	15/1					Omnitrophota	Omnitrophia	Omnitrophales	Aquincolibacteriaceae	Aquincolibacterium	Aquincolibacterium sp. MAG-0488		d__Bacteria;p__Omnitrophota;c__Omnitrophia;o__Omnitrophales;f__UBA2337;g__XYB12-FULL-50-7;s__	Finland: Lake Alinen Mustajarvi	water
169	GCA_001804345.1	RIFOXYB12_FULL_50_7	MAG	29364876, 27774985, 26844018, 28077899	PRJNA288027	SAMN04314472	75.45	0.17	13513	176	2.06216	2.72850142876077	17/0	*	*	*	N/A	Omnitrophota	Omnitrophia	Omnitrophales	Aquincolibacteriaceae	Aquincolibacterium	XYB12-FULL-50-7 sp001804345		d__Bacteria;p__Omnitrophota;c__Omnitrophia;o__Omnitrophales;f__UBA2337;g__XYB12-FULL-50-7;s__XYB12-FULL-50-7 sp001804345	USA: Rifle, Colorado	groundwater
170	GCA_003140935.1	fen_1321	MAG	30013118	PRJNA386568	SAMN08180158	96.36	1.82	75441	55	2.39637	2.44163450747198	18/0	*	*	*	13.09x	Omnitrophota	Omnitrophia	Omnitrophales	Aquincolibacteriaceae	Aquincolibacterium	XYB12-FULL-50-7 sp003140935		d__Bacteria;p__Omnitrophota;c__Omnitrophia;o__Omnitrophales;f__UBA2337;g__XYB12-FULL-50-7;s__XYB12-FULL-50-7 sp003140935	Sweden: Stordalen Mire	soil
171	GCA_002344825.1	UBA2337	MAG	28894102	PRJNA348753	SAMN06450436	97.82	0	43264	81	2.18248	2.23112246984257	21/1	*	*	*	35.6x	Omnitrophota	Omnitrophia	Omnitrophales	Aquincolibacteriaceae	Multiplicimicrobium	Multiplicimicrobium inquinatum	Yes	d__Bacteria;p__Omnitrophota;c__Omnitrophia;o__Omnitrophales;f__UBA2337;g__UBA2337;s__UBA2337 sp002344825	Australia: Thorneside, Queensland	bioreactor
172	GCA_003535755.1	UBA8997	MAG	28894102	PRJNA417962	SAMN08017969	87.27	0	9844	226	1.81697	2.08200870860548	14/1		*	*	6.44x	Omnitrophota	Omnitrophia	Omnitrophales	Aquincolibacteriaceae	Multiplicimicrobium	Multiplicimicrobium inquinatum		d__Bacteria;p__Omnitrophota;c__Omnitrophia;o__Omnitrophales;f__UBA2337;g__UBA2337;s__UBA2337 sp002344825	Australia: Thorneside, Queensland	bioreactor
173		IMG_2619618904	MAG	23511966, 21625595	PRJNA231881	SAMN02445067	62.56	0.17	9556	172	1.15753	1.84712308567775	18/0	*	*	*		Omnitrophota	Omnitrophia	Omnitrophales	Aquincolibacteriaceae	Multiplicimicrobium	Multiplicimicrobium inquinatum		d__Bacteria;p__Omnitrophota;c__Omnitrophia;o__Omnitrophales;f__UBA2337;g__UBA2337;s__UBA2337 sp002344825	Australia: Thorneside, Queensland	bioreactor
174		SAG_3300015414	SAG	33013724	PRJNA406436	SAMN07631860	50.91	0	12229	121	1.0398	2.04243567079159	13/0		*	*		Omnitrophota	Omnitrophia	Omnitrophales	Aquincolibacteriaceae	Multiplicimicrobium	Multiplicimicrobium sp. SAG-3300015414		d__Bacteria;p__Omnitrophota;c__Omnitrophia;o__Omnitrophales;f__UBA2337;g__UBA2337;s__	USA: Nevada	water
175	GCA_903819565.1	AM5_bin-0692	MAG	33990618	PRJEB38681	SAMEA6946521	93.06	4.55	13639	229	2.10802	2.16216097034172	16/1				N/A	Omnitrophota	Omnitrophia	Omnitrophales	Aquincolibacteriaceae	Pegaeibacterium	CAIJHQ01 sp903819565		d__Bacteria;p__Omnitrophota;c__Omnitrophia;o__Omnitrophales;f__UBA2337;g__CAIJHQ01;s__CAIJHQ01 sp903819565	Finland	water
176	GCA_903820505.1	AM-sed-core1-D1_bin-136	MAG	33990618	PRJEB38681	SAMEA6946395	100	0.17	72311	68	2.22809	2.2242982538	20/1	*	*	*	N/A	Omnitrophota	Omnitrophia	Omnitrophales	Aquincolibacteriaceae	Pegaeibacterium	Pegaeibacterium caenilacustre		d__Bacteria;p__Omnitrophota;c__Omnitrophia;o__Omnitrophales;f__UBA2337;g__CAIJHQ01;s__CAIJHQ01 sp903820505	Finland	sediment
177	GCA_903841325.1	AM-sed-core3-D0_bin-248	MAG	33990618	PRJEB38681	SAMEA6948840	100	0	11741	251	2.1056	2.105597	19/2	*	*	*	N/A	Omnitrophota	Omnitrophia	Omnitrophales	Aquincolibacteriaceae	Pegaeibacterium	Pegaeibacterium caenilacustre	Yes	d__Bacteria;p__Omnitrophota;c__Omnitrophia;o__Omnitrophales;f__UBA2337;g__CAIJHQ01;s__CAIJHQ01 sp903820505	Finland	sediment
178	GCA_002068945.1	ADurb.Bin314	MAG	32709258	PRJNA321808	SAMN05004172	81.82	3.64	11340	177	1.41192	1.66283300708873	16/0	*	*	*	5.3x	Omnitrophota	Omnitrophia	Omnitrophales	Aquincolibacteriaceae	UBA1443	UBA1443 sp002068945		d__Bacteria;p__Omnitrophota;c__Omnitrophia;o__Omnitrophales;f__UBA2337;g__UBA1443;s__UBA1443 sp002068945	USA: Urbana, Illinois	wastewater
179	GCA_002069585.1	ADurb.Bin292	MAG	31015394	PRJNA362212	SAMN06288075	98.18	3.64	14530	175	1.68732	1.65604641474842	20/1		*	*	5.9x	Omnitrophota	Omnitrophia	Omnitrophales	Aquincolibacteriaceae	UBA1443	UBA1443 sp002329545		d__Bacteria;p__Omnitrophota;c__Omnitrophia;o__Omnitrophales;f__UBA2337;g__UBA1443;s__UBA1443 sp002329545	USA: Urbana, Illinois	wastewater
180	GCA_002329545.1	UBA1443	MAG	28894102	PRJNA348753	SAMN06454366	95.45	0.17	25195	105	1.71567	1.7943953547407	20/2				7.85x	Omnitrophota	Omnitrophia	Omnitrophales	Aquincolibacteriaceae	UBA1443	UBA1443 sp002329545		d__Bacteria;p__Omnitrophota;c__Omnitrophia;o__Omnitrophales;f__UBA2337;g__UBA1443;s__UBA1443 sp002329545	Malaysia	bioreactor
181	GCA_001804155.1	RIFCSPHIGHO2_12_FULL_44_12	MAG	29364876, 27774985, 26844018, 28077900	PRJNA288027	SAMN04315626	96.2	0	16632	188	2.63684	2.74099584199584	15/0	*			N/A	Omnitrophota	Omnitrophia	Omnitrophales	Danuiimicrobiaceae	Danuiimicrobium	Danuiimicrobium aquiferis		d__Bacteria;p__Omnitrophota;c__Omnitrophia;o__Omnitrophales;f__2-12-FULL-44-17;g__2-12-FULL-44-17;s__2-12-FULL-44-17 sp001804285	USA: Rifle, Colorado	soil
182	GCA_001804245.1	RIFCSPLOWO2_02_FULL_44_11	MAG	29364876, 27774985, 26844018, 28077901	PRJNA288027	SAMN04316100	100	0	45042	99	3.14847	3.148472	19/2				N/A	Omnitrophota	Omnitrophia	Omnitrophales	Danuiimicrobiaceae	Danuiimicrobium	Danuiimicrobium aquiferis		d__Bacteria;p__Omnitrophota;c__Omnitrophia;o__Omnitrophales;f__2-12-FULL-44-17;g__2-12-FULL-44-17;s__2-12-FULL-44-17 sp001804285	USA: Rifle, Colorado	groundwater
183	GCA_001804285.1	RIFCSPLOWO2_12_FULL_44_17	MAG	29364876, 27774985, 26844018, 28077902	PRJNA288027	SAMN04315821	100	0	95362	69	3.02012	3.02012	19/2	*	*	*	N/A	Omnitrophota	Omnitrophia	Omnitrophales	Danuiimicrobiaceae	Danuiimicrobium	Danuiimicrobium aquiferis	Yes	d__Bacteria;p__Omnitrophota;c__Omnitrophia;o__Omnitrophales;f__2-12-FULL-44-17;g__2-12-FULL-44-17;s__2-12-FULL-44-17 sp001804285	USA: Rifle, Colorado	soil
184	GCA_001805325.1	RIFCSPHIGHO2_02_FULL_45_28	MAG	29364876, 27774985, 26844018, 28077903	PRJNA288027	SAMN04315325	92.73	0	95809	62	3.07542	3.31653294510946	18/2	*	*	*	N/A	Omnitrophota	Omnitrophia	Omnitrophales	Danuiimicrobiaceae	Danuiimicrobium	Danuiimicrobium aquiferis		d__Bacteria;p__Omnitrophota;c__Omnitrophia;o__Omnitrophales;f__2-12-FULL-44-17;g__2-12-FULL-44-17;s__2-12-FULL-44-17 sp001804285	USA: Rifle, Colorado	soil
185	GCA_001804155.1*	IMG_2710723590; RIFCSPHIGHO2_12_FULL_44_12	MAG	29364876, 27774985, 26844018, 28077904	PRJNA288027	SAMN04315626	96.2	0	16632	187	2.63624	2.74037733887734	15/0	*			-	Omnitrophota	Omnitrophia	Omnitrophales	Danuiimicrobiaceae	Danuiimicrobium	Danuiimicrobium aquiferis		d__Bacteria;p__Omnitrophota;c__Omnitrophia;o__Omnitrophales;f__2-12-FULL-44-17;g__2-12-FULL-44-17;s__2-12-FULL-44-17 sp001804285	USA: Rifle, Colorado	soil	Duplicate of GCA_001804155.1
186		MAG_1631	MAG		PRJNA367387	SAMN06267238	56.67	0	5056	154	0.797473	1.40722251632257	12/0	*				Omnitrophota	Omnitrophia	Omnitrophales	MAG-1631	MAG-1631	MAG-1631 sp. MAG-1631		d__Bacteria;p__Omnitrophota;c__Omnitrophia;o__Omnitrophales;f__;g__;s__	USA: Beatty, Nevada	geothermal spring
187		MAG_0155	MAG		PRJNA367361	SAMN06267035	49.23	0	4744	155	0.738521	-	7/0					Omnitrophota	Omnitrophia	Omnitrophales	MAG-1631	MAG-1631 gen.	MAG-1631 gen. sp. MAG-0155		d__Bacteria;p__Omnitrophota;c__Omnitrophia;o__Omnitrophales;f__;g__;s__	Netherlands	wastewater
188		SAG_3300015394	SAG	33013724	PRJNA406414	SAMN07631840	34.88	0	8905	106	0.716354	-	10/0					Omnitrophota	Omnitrophia	Omnitrophales	MAG-1631	MAG-1631 gen.	MAG-1631 gen. sp. SAG-3300015394		d__Bacteria;p__Omnitrophota;c__Omnitrophia;o__Omnitrophales;f__;g__;s__	USA: Nevada	water
189		MAG_1643	MAG		PRJNA367387	SAMN06267238	67.62	2.73	5794	216	1.16209	1.67163860529429	14/0					Omnitrophota	Omnitrophia	Omnitrophales	MAG-1631	MAG-1643	MAG-1643 sp. MAG-1643		d__Bacteria;p__Omnitrophota;c__Omnitrophia;o__Omnitrophales;f__;g__;s__	USA: Beatty, Nevada	geothermal spring
190	GCA_000405945.1	SCGC AAA011-A17	SAG	23851394	PRJNA192480	SAMN02440945	70.25	0	20345	150	2.03708	2.89975516014235	17/2	*	*	*		Omnitrophota	Omnitrophia	Omnitrophales	Omnitrophaceae	Omnitrophus	Omnitrophus fodinae	Yes	d__Bacteria;p__Omnitrophota;c__Omnitrophia;o__Omnitrophales;f__Omnitrophaceae;g__Omnitrophus;s__Omnitrophus fodinae	USA: Homestake Mine (HSM), South Dakota	groundwater
191	GCA_001804005.1	GWA2_50_21	MAG	29364876, 27774985, 26844018, 28077905	PRJNA288027	SAMN04314157	33.72	0	13215	79	0.92178	-	12/1				N/A	Omnitrophota	Omnitrophia	Omnitrophales	Omnitrophales fam.	Omnitrophales fam. gen.	Omnitrophales fam. gen. sp. GCA-001804005-1		d__Bacteria;p__Omnitrophota;c__Omnitrophia;o__Omnitrophales;f__Omnitrophaceae;g__Omnitrophus;s__	USA: Rifle, Colorado	soil
192		SAG_3300015420	SAG	33013724	PRJNA406406	SAMN07630221	41.82	0	12538	150	1.35404	-	15/1	*	*	*		Omnitrophota	Omnitrophia	Omnitrophales	Omnitrophales fam.	Omnitrophales fam. gen.	Omnitrophales fam. gen. sp. SAG-3300015420		d__Bacteria;p__Omnitrophota;c__Omnitrophia;o__Omnitrophales;f__Omnitrophaceae;g__Omnitrophus;s__	USA: Nevada	water
193		SAG_3300016011	SAG	33013724	PRJNA404551	SAMN07630488	22.89	0	12787	50	0.519923	-	4/0					Omnitrophota	Omnitrophia	Omnitrophales	Omnitrophales fam.	Omnitrophales fam. gen.	Omnitrophales fam. gen. sp. SAG-3300016011		d__Bacteria;p__Omnitrophota;c__Omnitrophia;o__;f__;g__;s__	USA: Nevada	groundwater
194	GCA_001804025.1	GWA2_52_8	MAG	29364876, 27774985, 26844018, 28077906	PRJNA288027	SAMN04314104	83.14	0	18053	146	2.1958	2.64108371421698	19/4	*	*	*	N/A	Omnitrophota	Omnitrophia	Omnitrophales	Taenariiviventaceae	GWA2-52-8	GWA2-52-8 sp001804025		d__Bacteria;p__Omnitrophota;c__Omnitrophia;o__Omnitrophales;f__GWA2-52-8;g__GWA2-52-8;s__GWA2-52-8 sp001804025	USA: Rifle, Colorado	soil
195		QZM4_2.bins.380.Tibie	MAG				83.72	2.18	7394	327	2.09175	2.44404064524606	17/0					Omnitrophota	Omnitrophia	Omnitrophales	Taenariiviventaceae	SAG-3300015153	SAG-3300015153 sp. QZM4-2-380		d__Bacteria;p__Omnitrophota;c__Omnitrophia;o__Omnitrophales;f__;g__;s__	China: Tengchong	geothermal spring
196		SAG_3300015153	SAG	33013724	PRJNA404658	SAMN07630144	66.2	0	13921	171	1.71262	2.58703474320242	11/0	*	*	*		Omnitrophota	Omnitrophia	Omnitrophales	Taenariiviventaceae	SAG-3300015153	SAG-3300015153 sp. SAG-3300015153		d__Bacteria;p__Omnitrophota;c__Omnitrophia;o__Omnitrophales;f__GWA2-52-8;g__;s__	USA: Nevada	water
197		SAG_3300016418	SAG	33013724	PRJNA404716	SAMN07629952	12.73	0	20667	104	1.22141	-	10/2					Omnitrophota	Omnitrophia	Omnitrophales	Taenariiviventaceae	SAG-3300015153	SAG-3300015153 sp. SAG-3300016418		d__Bacteria;p__Omnitrophota;c__Omnitrophia;o__Omnitrophales;f__GWA2-52-8;g__;s__	USA: South Dakota	wastewater
198	GCA_000402985.1	SCGC AAA257-O07	SAG	23851394	PRJNA192289	SAMN02441406	30.74	3.64	19198	60	0.767845	-	4/0	*	*	*		Omnitrophota	Omnitrophia	Omnitrophales	Taenariiviventaceae	Taenariiviventaceae gen.	Taenariiviventaceae gen. sp. GCA-000402985-1		d__Bacteria;p__Omnitrophota;c__Omnitrophia;o__Omnitrophales;f__GWA2-52-8;g__;s__	Greece: Etoliko Lagoon (ETL)	saline sediment
199	GCA_001805305.1	GWA2_52_12	MAG	29364876, 27774985, 26844018, 28077907	PRJNA288027	SAMN04313923	38.18	0	66739	17	1.03041	-	9/0				N/A	Omnitrophota	Omnitrophia	Omnitrophales	Taenariiviventaceae	Taenariiviventaceae gen.	Taenariiviventaceae gen. sp. GCA-001805305-1		d__Bacteria;p__Omnitrophota;c__Omnitrophia;o__Omnitrophales;f__GWA2-52-8;g__;s__	USA: Rifle, Colorado	soil
200		SAG_3300015410	SAG	33013724	PRJNA406435	SAMN07631859	36.36	0	12818	115	1.01938	-	15/0	*	*	*		Omnitrophota	Omnitrophia	Omnitrophales	Taenariiviventaceae	Taenariiviventaceae gen.	Taenariiviventaceae gen. sp. SAG-3300015410		d__Bacteria;p__Omnitrophota;c__Omnitrophia;o__Omnitrophales;f__GWA2-52-8;g__;s__	USA: Nevada	water
201		SAG_3300016449	SAG	33013724	PRJNA404711	SAMN07629947	46.12	0	31778	103	1.55119	-	14/2	*	*	*		Omnitrophota	Omnitrophia	Omnitrophales	Taenariiviventaceae	Taenariiviventaceae gen.	Taenariiviventaceae gen. sp. SAG-3300016449		d__Bacteria;p__Omnitrophota;c__Omnitrophia;o__Omnitrophales;f__GWA2-52-8;g__;s__	USA: South Dakota	wastewater
202	GCA_009691445.1	Baikal-deep-G204	MAG	33213521	PRJNA521725	SAMN10915831	96.36	0	40565	96	2.53612	2.6319198837692	20/0	*	*	*	N/A	Omnitrophota	Omnitrophia	Omnitrophales	Taenariiviventaceae	Taenariivivens	Taenariivivens baikalensis	Yes	d__Bacteria;p__Omnitrophota;c__Omnitrophia;o__Omnitrophales;f__GWA2-52-8;g__SICL01;s__SICL01 sp009691445	Russia: Lake Baikal	water
203		SAG_3300015575	SAG	33013724	PRJNA406376	SAMN07631806	25.01	0	8908	109	0.718616	-	13/0					Omnitrophota	Omnitrophota cl.	Omnitrophota cl. ord.	Omnitrophota cl. ord. fam.	Omnitrophota cl. ord. fam. gen.	Omnitrophota cl. ord. fam. gen. sp. SAG-3300015575		d__Bacteria;p__Omnitrophota;c__Koll11;o__;f__;g__;s__	USA: Nevada	geothermal spring
204		3300035698_1500	MAG	34707591	PRJNA33179	Multiple	82.14	0	14499	91	0.916014	1.11519	15/0	*				Omnitrophota	Incertae-sedis	Candidatus Kappaeales	Candidatus Kappaeaceae	Candidatus Kappaea	Candidatus Kappaea frigidicola	No	d__Bacteria;p__Omnitrophota;c__Koll11;o__;f__;g__;s__	Antarctica: Ace Lake	water	Not of sufficient quality to pass Bowers et al., 2018 criteria (completeness and contamination)
205	GCA_002085265.1	4484_49	MAG	31015394	PRJNA362212	SAMN06624600	64.3	0	10225	85	0.891312	1.38617729393468	13/2		*	*	18.0x	Omnitrophota	Incertae-sedis	4484-49	4484-49	4484-49	4484-49 sp002085265		d__Bacteria;p__Omnitrophota;c__Koll11;o__4484-49;f__4484-49;g__4484-49;s__4484-49 sp002085265	USA: Guaymas Basin, Gulf of California	saline sediment
206	GCA_003644455.1	B24_G15	MAG	31015394	PRJNA362212	SAMN09214895	63.31	3.8	4879	223	1.0444	1.58697330595483	17/2	*			41.43x	Omnitrophota	Incertae-sedis	4484-49	4484-49	4484-49	4484-49 sp002085265		d__Bacteria;p__Omnitrophota;c__Koll11;o__4484-49;f__4484-49;g__4484-49;s__4484-49 sp002085265	Mexico: Guaymas Basin, Gulf of California	saline sediment
207		3300035698_749	MAG	34707591	PRJNA33179	Multiple	98.21	1.79	42524	88	1.63126	1.66099	20/0	*	*	*		Omnitrophota	Incertae-sedis	4484-49	4484-49	Candidatus Saelkia	Candidatus Saelkia tenebricola	No	d__Bacteria;p__Omnitrophota;c__Koll11;o__4484-49;f__4484-49;g__;s__	Antarctica: Ace Lake	water	No SSU rRNA genes of sufficient length to pass QC. Williams et al. report all three rRNA genes as present
208		3300035698_1655	MAG	34707591	PRJNA33179	Multiple	98.21	0	78421	43	1.45724	1.4838	19/0	*	*	*		Omnitrophota	Incertae-sedis	4484-49	4484-49	Candidatus Kaelpia	Candidatus Kaelpia imicola	No	d__Bacteria;p__Omnitrophota;c__Koll11;o__4484-49;f__4484-49;g__;s__	Antarctica: Ace Lake	water	No SSU rRNA genes of sufficient length to pass QC. Williams et al. report all three rRNA genes as present
209		3300035698_2000	MAG	34707591	PRJNA33179	Multiple	98.21	0	53877	46	1.33919	1.3636	19/0	*	*	*		Omnitrophota	Incertae-sedis	4484-49	4484-49	Candidatus Kaelpia	Candidatus Kaelpia aquatica	No	d__Bacteria;p__Omnitrophota;c__Koll11;o__4484-49;f__4484-49;g__;s__	Antarctica: Ace Lake	water	No SSU rRNA genes of sufficient length to pass QC. Williams et al. report all three rRNA genes as present
210		JZ_2.bins.168.201808	MAG				86.61	5.45	5904	231	1.19789	1.30770258977023	18/1					Omnitrophota	Vampiricoccoidia	DTHP01	DTHP01	DTHP01	DTHP01 sp. JZ-2-168-201808		d__Bacteria;p__Omnitrophota;c__Koll11;o__DTHP01;f__DTHP01;g__;s__	China: Jinze Spring, Tengchong	geothermal spring
211		QZM4_1.bins.105.Tibie	MAG				92.56	3.64	11617	143	1.29565	1.34884324070873	19/0	*	*	*		Omnitrophota	Vampiricoccoidia	DTHP01	DTHP01	DTHP01	DTHP01 sp. QZM4-1-105		d__Bacteria;p__Omnitrophota;c__Koll11;o__DTHP01;f__DTHP01;g__DTHP01;s__	China: Tengchong	geothermal spring
212		QZM4_2.bins.244.Tibie	MAG				87.11	1.82	31999	72	1.36995	1.54404195431064	19/0		*	*		Omnitrophota	Vampiricoccoidia	DTHP01	DTHP01	DTHP01	DTHP01 sp. QZM4-1-105		d__Bacteria;p__Omnitrophota;c__Koll11;o__DTHP01;f__DTHP01;g__DTHP01;s__	China: Tengchong	geothermal spring
213		QZM4_2.bins.198.Tibie	MAG				100	4.55	115488	31	1.50656	1.438015338	19/0		*	*		Omnitrophota	Vampiricoccoidia	DTHP01	DTHP01	DTHP01	DTHP01 sp. QZM4-2-198		d__Bacteria;p__Omnitrophota;c__Koll11;o__DTHP01;f__DTHP01;g__DTHP01;s__	China: Tengchong	geothermal spring
214	GCA_011334725.1	SpSt-789	MAG	31911466	PRJNA480137	SAMN09639923	98.18	0	47433	39	1.24298	1.26601853738032	21/1		*	*	20.31x	Omnitrophota	Vampiricoccoidia	DTHP01	DTHP01	DTHP01	DTHP01 sp011334725		d__Bacteria;p__Omnitrophota;c__Koll11;o__DTHP01;f__DTHP01;g__DTHP01;s__DTHP01 sp011334725	USA: Yellowstone National Park	geothermal spring
215	GCA_002049895.1	4484_171	MAG	31015394	PRJNA362212	SAMN06288075	85.45	0	14054	108	1.26784	1.48372498537156	18/0		*	*	19.0x	Omnitrophota	Vampiricoccoidia	Duberdicusellales	4484-171	4484-171	4484-171 sp002049895		d__Bacteria;p__Omnitrophota;c__Koll11;o__4484-171;f__4484-171;g__4484-171;s__4484-171 sp002049895	USA: Guaymas Basin, Gulf of California	saline sediment
216	GCA_003229515.1	SZUA-209	MAG	31911466	PRJNA385762	SAMN09240193	52.64	0	2941	311	0.86823	1.64937310030395	8/0			*	2.87x	Omnitrophota	Vampiricoccoidia	Duberdicusellales	4484-171	4484-171 gen.	4484-171 gen. sp. GCA-003229515-1		d__Bacteria;p__Omnitrophota;c__Koll11;o__4484-171;f__4484-171;g__;s__	Atlantic Ocean: Mid-Atlantic Ridge, Guaymas Basin, Black smoker hydrothermal vent	saline sediment
217		3300035698_1005	MAG	34707591	PRJNA33179	Multiple	87.5	5.42	18133	108	1.10875	1.26715	18/0	*	*	*		Omnitrophota	Vampiricoccoidia	Duberdicusellales	4484-171	Candidatus Susulua	Candidatus Susulua stagnicola	No	d__Bacteria;p__Omnitrophota;c__Koll11;o__4484-171;f__4484-171;g__;s__	Antarctica: Ace Lake	water	Not of sufficient quality to pass Bowers et al., 2018 criteria (completeness and contamination)
218	GCA_003644405.1	B7_G16	MAG	31015394	PRJNA362212	SAMN09214961	92.73	0	11976	175	1.42876	1.54077860455085	14/2	*	*	*	197.83x	Omnitrophota	Vampiricoccoidia	Duberdicusellales	4484-171	B7-G16	B7-G16 sp003644405		d__Bacteria;p__Omnitrophota;c__Koll11;o__4484-171;f__4484-171;g__B7-G16;s__B7-G16 sp003644405	Mexico: Guaymas Basin, Gulf of California	saline sediment
219	GCA_011041545.1	HyVt-220	MAG	31911466	PRJNA480137	SAMN09638396	81.29	3.55	9601	147	1.01382	1.20288657460942	-	-	-	-	13.29x	Omnitrophota	Vampiricoccoidia	Duberdicusellales	4484-171	B7-G16	B7-G16 sp003644405		d__Bacteria;p__Omnitrophota;c__Koll11;o__4484-171;f__4484-171;g__B7-G16;s__B7-G16 sp003644405	Mexico: Guaymas Basin, Gulf of California	saline sediment
220		MAG_0992	MAG		PRJNA364999	SAMN06264663	74.3	1.82	8049	129	0.917799	1.21277935154778	13/1	*				Omnitrophota	Vampiricoccoidia	Duberdicusellales	4484-171	B7-G16	B7-G16 sp003644405		d__Bacteria;p__Omnitrophota;c__Koll11;o__4484-171;f__4484-171;g__B7-G16;s__B7-G16 sp003644405	Mexico: Guaymas Basin, Gulf of California	saline sediment
221		DG_1_4.bins.65.Tibie	MAG				94.55	9.34	16328	147	1.60565	1.53959281840296	21/3		*			Omnitrophota	Vampiricoccoidia	Duberdicusellales	4484-171	DG-1-4-65	DG-1-4-65 sp. DG-1-4-65		d__Bacteria;p__Omnitrophota;c__Koll11;o__4484-171;f__4484-171;g__;s__	China: Tengchong	geothermal spring
222		DG_2.bins.39.Tibie	MAG				55.79	3.64	4356	241	1.02076	1.76304083455816	16/0					Omnitrophota	Vampiricoccoidia	Duberdicusellales	4484-171	DG-1-4-65	DG-1-4-65 sp. DG-1-4-65		d__Bacteria;p__Omnitrophota;c__Koll11;o__4484-171;f__4484-171;g__;s__	China: Tengchong	geothermal spring
223		QZM4_2.bins.51.Tibie	MAG				94.91	4.71	12553	189	1.64901	1.65561028679802	20/0		*	*		Omnitrophota	Vampiricoccoidia	Duberdicusellales	4484-171	DG-1-4-65	DG-1-4-65 sp. QZM4-2-51		d__Bacteria;p__Omnitrophota;c__Koll11;o__4484-171;f__4484-171;g__;s__	China: Tengchong	geothermal spring
224	GCA_003154195.1	fen_1318	MAG	30013118	PRJNA386568	SAMN08179760	96.2	1.82	117784	34	2.48219	2.53327465155925	20/1	*	*	*	23.08x	Omnitrophota	Vampiricoccoidia	Duberdicusellales	4484-171	Fen-1317	Fen-1317 sp003154195		d__Bacteria;p__Omnitrophota;c__Koll11;o__4484-171;f__4484-171;g__Fen-1317;s__Fen-1317 sp003154195	Sweden: Stordalen Mire	soil
225	GCA_003154645.1	fen_1317	MAG	30013118	PRJNA386568	SAMN08179725	92.4	1.82	20673	166	2.43542	2.58776978701299	19/6				10.87x	Omnitrophota	Vampiricoccoidia	Duberdicusellales	4484-171	Fen-1317	Fen-1317 sp003154195		d__Bacteria;p__Omnitrophota;c__Koll11;o__4484-171;f__4484-171;g__Fen-1317;s__Fen-1317 sp003154195	Sweden: Stordalen Mire	soil
226	GCA_002085345.1	4484_70.2	MAG	31015394	PRJNA362212	SAMN06624653	80.91	10	13215	142	1.65032	1.83572525027809	19/0				30.0x	Omnitrophota	Vampiricoccoidia	Duberdicusellales	4484-171	GCA-002085345-1	GCA-002085345-1 sp. GCA-002085345-1		d__Bacteria;p__Omnitrophota;c__Koll11;o__4484-171;f__4484-171;g__;s__	USA: Guaymas Basin, Gulf of California	saline sediment
227	GCA_002085315.1	4484_70.1	MAG	31015394	PRJNA362212	SAMN06624652	72.73	5.45	31220	76	1.70116	2.21153139007287	17/0	*	*	*	30.0x	Omnitrophota	Vampiricoccoidia	Duberdicusellales	4484-171	GCA-003644465-1	GCA-003644465-1 sp. GCA-002085315-1		d__Bacteria;p__Omnitrophota;c__Koll11;o__4484-171;f__4484-171;g__;s__	USA: Guaymas Basin, Gulf of California	saline sediment
228	GCA_003644465.1	B18_G15	MAG	31015394	PRJNA362212	SAMN09214893	62.73	0.17	4385	237	1.03148	1.64152475785111	14/1				62.49x	Omnitrophota	Vampiricoccoidia	Duberdicusellales	4484-171	GCA-003644465-1	GCA-003644465-1 sp. GCA-003644465-1		d__Bacteria;p__Omnitrophota;c__Koll11;o__4484-171;f__4484-171;g__;s__	Mexico: Guaymas Basin, Gulf of California	saline sediment
229	GCA_003558915.1	CSSed10_381R1	MAG	30231921	PRJNA434545	SAMN08574584	91.82	6.36	11648	234	1.68841	1.72187765236332	17/0	*			14.1x	Omnitrophota	Vampiricoccoidia	Duberdicusellales	4484-171	PXAH01	PXAH01 sp. GCA-003558915-1		d__Bacteria;p__Omnitrophota;c__Koll11;o__4484-171;f__4484-171;g__PXAH01;s__	Russia: Kulunda Steppe	saline sediment
230	GCA_003565945.1	T3Sed10_202R1	MAG	30231921	PRJNA434545	SAMN08574890	89.09	2.73	11104	146	1.19456	1.30423577113032	17/1	*	*	*	21.97x	Omnitrophota	Vampiricoccoidia	Duberdicusellales	4484-171	PXAH01	PXAH01 sp003565945		d__Bacteria;p__Omnitrophota;c__Koll11;o__4484-171;f__4484-171;g__PXAH01;s__PXAH01 sp003565945	Russia: Kulunda Steppe	saline sediment
231		DG_1_4.bins.113.Tibie	MAG				92.73	0	14296	192	1.8777	2.02491642402674	21/2	*	*	*		Omnitrophota	Vampiricoccoidia	Duberdicusellales	4484-171	QZM4-2-366	QZM4-2-366 sp. DG-1-4-113		d__Bacteria;p__Omnitrophota;c__Koll11;o__4484-171;f__4484-171;g__;s__	China: Tengchong	geothermal spring
232		DG_1_5.bins.7.Tibie	MAG				72.73	3.14	7613	225	1.42785	1.90157235363674	20/1	*	*	*		Omnitrophota	Vampiricoccoidia	Duberdicusellales	4484-171	QZM4-2-366	QZM4-2-366 sp. DG-1-4-113		d__Bacteria;p__Omnitrophota;c__Koll11;o__4484-171;f__4484-171;g__;s__	China: Tengchong	geothermal spring
233		QZM4_2.bins.366.Tibie	MAG				90	1.82	9420	222	1.58345	1.72737019288889	20/4					Omnitrophota	Vampiricoccoidia	Duberdicusellales	4484-171	QZM4-2-366	QZM4-2-366 sp. QZM4-2-366		d__Bacteria;p__Omnitrophota;c__Koll11;o__4484-171;f__4484-171;g__;s__	China: Tengchong	geothermal spring
234	GCA_003644345.1	B98_G9	MAG	31015394	PRJNA362212	SAMN09215262	62.73	0	15824	115	1.15048	1.8340251873107	16/3		*	*	62.76x	Omnitrophota	Vampiricoccoidia	Duberdicusellales	Duberdicusellaceae	Duberdicusella	Duberdicusella sinuisediminis		d__Bacteria;p__Omnitrophota;c__Koll11;o__4484-171;f__B32-G15;g__B32-G15;s__B32-G15 sp003644445	Mexico: Guaymas Basin, Gulf of California	saline sediment
235	GCA_003644445.1	B32_G15	MAG	31015394	PRJNA362212	SAMN09214896	88.18	0.91	15611	117	1.20188	1.35057939464731	18/2	*	*	*	67.05x	Omnitrophota	Vampiricoccoidia	Duberdicusellales	Duberdicusellaceae	Duberdicusella	Duberdicusella sinuisediminis		d__Bacteria;p__Omnitrophota;c__Koll11;o__4484-171;f__B32-G15;g__B32-G15;s__B32-G15 sp003644445	Mexico: Guaymas Basin, Gulf of California	saline sediment
236	GCA_003644525.1	B11_G16	MAG	31015394	PRJNA362212	SAMN09214960	97.27	0	19846	113	1.42613	1.46616017271512	19/1	imputed from _GCA_003644445.1	*	*	58.96x	Omnitrophota	Vampiricoccoidia	Duberdicusellales	Duberdicusellaceae	Duberdicusella	Duberdicusella sinuisediminis	Yes	d__Bacteria;p__Omnitrophota;c__Koll11;o__4484-171;f__B32-G15;g__B32-G15;s__B32-G15 sp003644445	Mexico: Guaymas Basin, Gulf of California	saline sediment
237	GCA_011052855.1	HyVt-385	MAG	31911466	PRJNA480137	SAMN09638578	90	0	11385	181	1.56186	1.73539555555556	19/1				4.81x	Omnitrophota	Vampiricoccoidia	Duberdicusellales	Duberdicusellaceae	Duberdicusella	Duberdicusella sinuisediminis		d__Bacteria;p__Omnitrophota;c__Koll11;o__4484-171;f__B32-G15;g__B32-G15;s__B32-G15 sp003644445	Mexico: Guaymas Basin, Gulf of California	saline sediment
238		SAG_3300015238	SAG	33013724	PRJNA404659	SAMN07630145	67.11	0	22174	105	1.46047	2.17622857994338	18/0	*	*	*		Omnitrophota	Vampiricoccoidia	Fredricksoniimonadales	Zapsychraceae	2-02-FULL-48-11	2-02-FULL-48-11 sp. SAG-3300015238		d__Bacteria;p__Omnitrophota;c__Koll11;o__UBA10015;f__Kpj58rc;g__2-02-FULL-48-11;s__	USA: Nevada	water
239	GCA_001805525.1	RIFCSPHIGHO2_01_FULL_48_9	MAG	29364876, 27774985, 26844018, 28077908	PRJNA288027	SAMN04314940	81.21	0	18150	143	2.05604	2.53175224726019	19/0	*		*	N/A	Omnitrophota	Vampiricoccoidia	Fredricksoniimonadales	Zapsychraceae	2-02-FULL-48-11	2-02-FULL-48-11 sp001805615		d__Bacteria;p__Omnitrophota;c__Koll11;o__UBA10015;f__Kpj58rc;g__2-02-FULL-48-11;s__2-02-FULL-48-11 sp001805615	USA: Rifle, Colorado	soil
240	GCA_001805615.1	RIFCSPHIGHO2_02_FULL_48_11	MAG	29364876, 27774985, 26844018, 28077909	PRJNA288027	SAMN04315463	96.36	1.82	28296	95	2.01293	2.05095330136986	19/0	*			N/A	Omnitrophota	Vampiricoccoidia	Fredricksoniimonadales	Zapsychraceae	2-02-FULL-48-11	2-02-FULL-48-11 sp001805615		d__Bacteria;p__Omnitrophota;c__Koll11;o__UBA10015;f__Kpj58rc;g__2-02-FULL-48-11;s__2-02-FULL-48-11 sp001805615	USA: Rifle, Colorado	soil
241	GCA_001805655.1	RIFCSPHIGHO2_02_FULL_52_10	MAG	29364876, 27774985, 26844018, 28077910	PRJNA288027	SAMN04315389	80.25	1.82	14404	137	1.56453	1.91409281146417	16/0	*	*	*	N/A	Omnitrophota	Vampiricoccoidia	Fredricksoniimonadales	Zapsychraceae	2-02-FULL-52-10	2-02-FULL-52-10 sp001805655		d__Bacteria;p__Omnitrophota;c__Koll11;o__UBA10015;f__Kpj58rc;g__2-02-FULL-52-10;s__2-02-FULL-52-10 sp001805655	USA: Rifle, Colorado	soil
242		IMG_2786546431	MAG	29379208	PRJNA416587	SAMN07960352	52.19	0	1899	453	0.81663	1.56472504311171	13/0	*	*	*		Omnitrophota	Vampiricoccoidia	Fredricksoniimonadales	Zapsychraceae	Zapsychraceae gen.	Zapsychraceae gen. sp. IMG-2786546431		d__Bacteria;p__Omnitrophota;c__Koll11;o__UBA10015;f__Kpj58rc;g__;s__	USA: Utah, Grand County	groundwater
243		SAG_3300010838	SAG	33013724	PRJNA444476		28.18	0	8746	119	0.800982	-	8/0					Omnitrophota	Vampiricoccoidia	Fredricksoniimonadales	Zapsychraceae	Zapsychraceae gen.	Zapsychraceae gen. sp. SAG-3300010838		d__Bacteria;p__Omnitrophota;c__Koll11;o__UBA10015;f__Kpj58rc;g__;s__	USA: Beatty, Nevada	groundwater
244		SAG_3300015152	SAG	33013724	PRJNA404663	SAMN07630149	43.64	0	16019	98	1.14094	-	15/1					Omnitrophota	Vampiricoccoidia	Fredricksoniimonadales	Zapsychraceae	Zapsychraceae gen.	Zapsychraceae gen. sp. SAG-3300015152		d__Bacteria;p__Omnitrophota;c__Koll11;o__UBA10015;f__Kpj58rc;g__;s__	USA: Nevada	water
245		SAG_3300016450	SAG	33013724	PRJNA404713	SAMN07629949	46.36	0	21627	98	1.33205	-	18/0	*	*	*		Omnitrophota	Vampiricoccoidia	Fredricksoniimonadales	Zapsychraceae	Zapsychraceae gen.	Zapsychraceae gen. sp. SAG-3300016450		d__Bacteria;p__Omnitrophota;c__Koll11;o__UBA10015;f__Kpj58rc;g__;s__	USA: South Dakota	wastewater
246		IMG_2634166877	SAG	33013724			39.09	0	27352	62	0.949576	-	10/0	*	*	*		Omnitrophota	Vampiricoccoidia	Fredricksoniimonadales	Zapsychraceae	Zapsychrus	Zapsychrus sp. IMG-2634166877		d__Bacteria;p__Omnitrophota;c__Koll11;o__UBA10015;f__Kpj58rc;g__UBA12451;s__	Hong Kong: Shatin	bioreactor
247		SAG_3300015422	SAG	33013724	PRJNA406395	SAMN07630220	54.96	0	18661	117	1.29409	2.35461062590975	17/2					Omnitrophota	Vampiricoccoidia	Fredricksoniimonadales	Zapsychraceae	Zapsychrus	Zapsychrus sp. SAG-3300015422		d__Bacteria;p__Omnitrophota;c__Koll11;o__UBA10015;f__Kpj58rc;g__UBA12451;s__	USA: Nevada	water
248		SAG_3300016330	SAG	33013724	PRJNA404707	SAMN07629943	45.45	0	21293	66	0.755264	-	11/0	*	*	*		Omnitrophota	Vampiricoccoidia	Fredricksoniimonadales	Zapsychraceae	Zapsychrus	Zapsychrus sp. SAG-3300016330		d__Bacteria;p__Omnitrophota;c__Koll11;o__UBA10015;f__Kpj58rc;g__;s__	USA: South Dakota	wastewater
249		SAG_3300016434	SAG	33013724	PRJNA406533	SAMN07631610	62.98	0	29543	77	1.38499	2.19909495077803	11/0	*	*	*		Omnitrophota	Vampiricoccoidia	Fredricksoniimonadales	Zapsychraceae	Zapsychrus	Zapsychrus sp. SAG-3300016434		d__Bacteria;p__Omnitrophota;c__Koll11;o__UBA10015;f__Kpj58rc;g__UBA12451;s__	USA: South Dakota	wastewater
250	GCA_001804365.1	GWA2_37_7	MAG	29364876, 27774985, 26844018, 28077911	PRJNA288027	SAMN04313927	68.48	3.64	12660	137	1.60195	2.25414295093458	16/0	*	*	*	N/A	Omnitrophota	Vampiricoccoidia	Fredricksoniimonadales	Zapsychraceae	Zapsychrus	Zapsychrus unditaenarius		d__Bacteria;p__Omnitrophota;c__Koll11;o__UBA10015;f__Kpj58rc;g__UBA12451;s__UBA12451 sp001805965	USA: Rifle, Colorado	soil
251	GCA_001804475.1	GWF2_38_59	MAG	29364876, 27774985, 26844018, 28077912	PRJNA288027	SAMN04313924	94.55	0.91	50494	88	2.52572	2.64699625288207	19/0	*	*	*	N/A	Omnitrophota	Vampiricoccoidia	Fredricksoniimonadales	Zapsychraceae	Zapsychrus	Zapsychrus unditaenarius		d__Bacteria;p__Omnitrophota;c__Koll11;o__UBA10015;f__Kpj58rc;g__UBA12451;s__UBA12451 sp001805965	USA: Rifle, Colorado	soil
252	GCA_001805945.1	RIFOXYA12_FULL_38_10	MAG	29364876, 27774985, 26844018, 28077913	PRJNA288027	SAMN04314388	92.98	0	18292	154	2.27093	2.44238653473865	18/0	*	*	*	N/A	Omnitrophota	Vampiricoccoidia	Fredricksoniimonadales	Zapsychraceae	Zapsychrus	Zapsychrus unditaenarius		d__Bacteria;p__Omnitrophota;c__Koll11;o__UBA10015;f__Kpj58rc;g__UBA12451;s__UBA12451 sp001805965	USA: Rifle, Colorado	soil
253	GCA_001805965.1	RIFOXYA2_FULL_38_17	MAG	29364876, 27774985, 26844018, 28077914	PRJNA288027	SAMN04314364	98.18	0.91	55792	78	2.67715	2.70196569240171	20/0	*	*	*	N/A	Omnitrophota	Vampiricoccoidia	Fredricksoniimonadales	Zapsychraceae	Zapsychrus	Zapsychrus unditaenarius	Yes	d__Bacteria;p__Omnitrophota;c__Koll11;o__UBA10015;f__Kpj58rc;g__UBA12451;s__UBA12451 sp001805965	USA: Rifle, Colorado	groundwater
254	GCA_001805995.1	RIFOXYB2_FULL_38_16	MAG	29364876, 27774985, 26844018, 28077915	PRJNA288027	SAMN04314427	98.18	0.91	44242	95	2.74648	2.77193627215319	21/2	*	*	*	N/A	Omnitrophota	Vampiricoccoidia	Fredricksoniimonadales	Zapsychraceae	Zapsychrus	Zapsychrus unditaenarius		d__Bacteria;p__Omnitrophota;c__Koll11;o__UBA10015;f__Kpj58rc;g__UBA12451;s__UBA12451 sp001805965	USA: Rifle, Colorado	groundwater
255	GCA_001806045.1	RIFOXYC2_FULL_38_12	MAG	29364876, 27774985, 26844018, 28077916	PRJNA288027	SAMN04314568	96.36	4.55	55827	86	2.75002	2.72404949149024	19/0	*	*	*	N/A	Omnitrophota	Vampiricoccoidia	Fredricksoniimonadales	Zapsychraceae	Zapsychrus	Zapsychrus unditaenarius		d__Bacteria;p__Omnitrophota;c__Koll11;o__UBA10015;f__Kpj58rc;g__UBA12451;s__UBA12451 sp001805965	USA: Rifle, Colorado	soil	16S rRNA disagrees with genome phylogeny; likely contamination.
256	GCA_003500255.1	UBA12451	MAG	28894102	PRJNA417962	SAMN08018733	96.2	0	76188	69	2.61397	2.71722765072765	18/0	*	*	*	42.88x	Omnitrophota	Vampiricoccoidia	Fredricksoniimonadales	Zapsychraceae	Zapsychrus	Zapsychrus unditaenarius		d__Bacteria;p__Omnitrophota;c__Koll11;o__UBA10015;f__Kpj58rc;g__UBA12451;s__UBA12451 sp001805965	USA: Rifle, Colorado	groundwater
257		3300035698_1555	MAG	34707591	PRJNA33179	Multiple	96.43	1.79	27791	129	2.04406	2.11974	19/1	*	*	*		Omnitrophota	Vampiricoccoidia	Fredricksoniimonadales	Zapsychraceae	Zapsychrus	Candidatus Zapsychrus exili	Yes	d__Bacteria;p__Omnitrophota;c__Koll11;o__UBA10015;f__Kpj58rc;g__UBA12451;s__	Antarctica: Ace Lake	water	Although all three rRNA genes were reported as present previously (Williams et al., 2021), the rRNA genes are of insufficient length to pass quality standards criteria proposed in Bowers et al., 2018. However, this taxon is proposed as nomenclatural type for the genus to ensure longevity and priority of the historical name, in the event that further taxonomic revision to the genus would be requir…
258	GCA_001805375.1	GWA2_47_8	MAG	29364876, 27774985, 26844018, 28077917	PRJNA288027	SAMN04314109	82.18	8.18	20951	157	2.40036	2.68192611243612	18/0		*	*	N/A	Omnitrophota	Vampiricoccoidia	Fredricksoniimonadales	Zapsychraceae	GWA2-47-8	GWA2-47-8 sp001805375		d__Bacteria;p__Omnitrophota;c__Koll11;o__UBA10015;f__Kpj58rc;g__GWA2-47-8;s__GWA2-47-8 sp001805375	USA: Rifle, Colorado	soil
259		MAG_1627	MAG		PRJNA367387	SAMN06267238	97.27	5.45	37701	139	2.74418	2.66744728282101	19/0	*				Omnitrophota	Vampiricoccoidia	Fredricksoniimonadales	Zapsychraceae	MAG-1627	MAG-1627 sp. MAG-1627		d__Bacteria;p__Omnitrophota;c__Koll11;o__UBA10015;f__Kpj58rc;g__;s__	USA: Beatty, Nevada	geothermal spring
260	GCA_001805645.1	RIFCSPHIGHO2_02_FULL_50_17	MAG	29364876, 27774985, 26844018, 28077918	PRJNA288027	SAMN04315540	93.64	0	33698	77	1.92421	2.05490388722768	18/0		*	*	N/A	Omnitrophota	Vampiricoccoidia	Fredricksoniimonadales	Zapsychraceae	O2-FULL-52-10	O2-FULL-52-10 sp001805645		d__Bacteria;p__Omnitrophota;c__Koll11;o__UBA10015;f__Kpj58rc;g__O2-FULL-52-10;s__O2-FULL-52-10 sp001805645	USA: Rifle, Colorado	soil
261	GCA_001805855.1	RIFCSPLOWO2_12_FULL_50_9	MAG	29364876, 27774985, 26844018, 28077919	PRJNA288027	SAMN04315879	69.83	0	14271	101	1.23654	1.77078333094658	15/0		*	*	N/A	Omnitrophota	Vampiricoccoidia	Fredricksoniimonadales	Zapsychraceae	O2-FULL-52-10	O2-FULL-52-10 sp001805645		d__Bacteria;p__Omnitrophota;c__Koll11;o__UBA10015;f__Kpj58rc;g__O2-FULL-52-10;s__O2-FULL-52-10 sp001805645	USA: Rifle, Colorado	soil
262		SAG_3300015418	SAG	33013724	PRJNA406391	SAMN07631819	55.43	0	15406	123	1.27435	2.29903481869024	17/2	*	*	*		Omnitrophota	Vampiricoccoidia	Fredricksoniimonadales	Zapsychraceae	SAG-3300015418	SAG-3300015418 sp. SAG-3300015418		d__Bacteria;p__Omnitrophota;c__Koll11;o__UBA10015;f__;g__;s__	USA: Nevada	water
263		SAG_3300015421	SAG	33013724	PRJNA406413	SAMN07631839	60.73	0	17654	124	1.35145	2.2253449695373	16/0	*	*	*		Omnitrophota	Vampiricoccoidia	Fredricksoniimonadales	Zapsychraceae	SAG-3300015421	SAG-3300015421 sp. SAG-3300015421		d__Bacteria;p__Omnitrophota;c__Koll11;o__UBA10015;f__Kpj58rc;g__;s__	USA: Nevada	water
264		SAG_3300016481	SAG	33013724	PRJNA406513	SAMN07631591	53.64	0	12882	178	1.71841	3.20360178970917	14/0		*	*		Omnitrophota	Vampiricoccoidia	Fredricksoniimonadales	Zapsychraceae	SAG-3300016481	SAG-3300016481 sp. SAG-3300016481		d__Bacteria;p__Omnitrophota;c__Koll11;o__UBA10015;f__Kpj58rc;g__;s__	USA: Nevada	groundwater
265	GCA_001805565.1	RIFCSPHIGHO2_01_FULL_52_10	MAG	29364876, 27774985, 26844018, 28077920	PRJNA288027	SAMN04314858	51.16	0	8437	105	0.898107	1.75548670836591	14/0				N/A	Omnitrophota	Vampiricoccoidia	Fredricksoniimonadales	Zapsychraceae	UBA10015	UBA10015 sp001805565		d__Bacteria;p__Omnitrophota;c__Koll11;o__UBA10015;f__Kpj58rc;g__UBA10015;s__UBA10015 sp001805565	USA: Rifle, Colorado	soil
266	GCA_001805395.1	GWA2_53_43	MAG	29364876, 27774985, 26844018, 28077921	PRJNA288027	SAMN04313926	75.45	0	45481	32	1.02566	1.35938634857522	14/0	*			N/A	Omnitrophota	Vampiricoccoidia	Fredricksoniimonadales	Zapsychraceae	UBA10015	UBA10015 sp003522725		d__Bacteria;p__Omnitrophota;c__Koll11;o__UBA10015;f__Kpj58rc;g__UBA10015;s__UBA10015 sp003522725	USA: Rifle, Colorado	soil
267	GCA_003522725.1	UBA10147	MAG	28894102	PRJNA417962	SAMN08019819	95.45	1.82	28527	89	1.81439	1.8662881395495	19/1	*			27.27x	Omnitrophota	Vampiricoccoidia	Fredricksoniimonadales	Zapsychraceae	UBA10015	UBA10015 sp003522725		d__Bacteria;p__Omnitrophota;c__Koll11;o__UBA10015;f__Kpj58rc;g__UBA10015;s__UBA10015 sp003522725	USA: Rifle, Colorado	groundwater
268	GCA_003529035.1	UBA10015	MAG	28894102	PRJNA417962	SAMN08019074	79.93	8.18	12730	178	1.78547	2.05106672813712	17/0				8.24x	Omnitrophota	Vampiricoccoidia	Fredricksoniimonadales	Zapsychraceae	UBA10015	UBA10015 sp003522725		d__Bacteria;p__Omnitrophota;c__Koll11;o__UBA10015;f__Kpj58rc;g__UBA10015;s__UBA10015 sp003522725	USA: Rifle, Colorado	groundwater
269	GCA_005239675.1	Bin_37_8	MAG	30674352	PRJNA414404	SAMN08774426	84.55	1.82	34716	50	1.3193	1.53197494121821	15/0				30x	Omnitrophota	Vampiricoccoidia	Fredricksoniimonadales	Zapsychraceae	UBA10015	UBA10015 sp005239675		d__Bacteria;p__Omnitrophota;c__Koll11;o__UBA10015;f__Kpj58rc;g__UBA10015;s__UBA10015 sp005239675	Italy: Trento, Comano Thermal Spring	groundwater
270	GCA_001804395.1	GWA2_45_18	MAG	29364876, 27774985, 26844018, 28077922	PRJNA288027	SAMN04314102	88.18	1.82	133212	24	2.33574	2.60062653368111	18/0	*	*	*	N/A	Omnitrophota	Vampiricoccoidia	Fredricksoniimonadales	Zapsychraceae	UBA10174	UBA10174 sp003528115		d__Bacteria;p__Omnitrophota;c__Koll11;o__UBA10015;f__Kpj58rc;g__UBA10174;s__UBA10174 sp003528115	USA: Rifle, Colorado	soil
271	GCA_001805405.1	GWC2_45_7	MAG	29364876, 27774985, 26844018, 28077923	PRJNA288027	SAMN04313925	71.16	1.82	15451	98	1.34007	1.84890765823496	14/0	*			N/A	Omnitrophota	Vampiricoccoidia	Fredricksoniimonadales	Zapsychraceae	UBA10174	UBA10174 sp003528115		d__Bacteria;p__Omnitrophota;c__Koll11;o__UBA10015;f__Kpj58rc;g__UBA10174;s__UBA10174 sp003528115	USA: Rifle, Colorado	soil
272	GCA_003528115.1	UBA10174	MAG	28894102	PRJNA417962	SAMN08019108	90	1.82	85965	43	2.38763	2.60463576511111	19/1	*	*	*	12.80x	Omnitrophota	Vampiricoccoidia	Fredricksoniimonadales	Zapsychraceae	UBA10174	UBA10174 sp003528115		d__Bacteria;p__Omnitrophota;c__Koll11;o__UBA10015;f__Kpj58rc;g__UBA10174;s__UBA10174 sp003528115	USA: Rifle, Colorado	groundwater
273	GCA_013335325.1	W9_Combined_metabat1_094	MAG		PRJNA615962	SAMN14482952	89.83	0	12740	230	2.09115	2.32789379939886	17/2	*	*	*	22.95x	Omnitrophota	Vampiricoccoidia	Fredricksoniimonadales	Fredricksoniimonadaceae	CAJARJ01	CAJARJ01 sp013335325		d__Bacteria;p__Omnitrophota;c__Koll11;o__UBA10015;f__GCA-002753745;g__CAJARJ01;s__CAJARJ01 sp013335325	USA: Wisconsin, near Picnic Point on the coast of Lake Mendota	other
274	GCA_903933965.1	Loc090907-5m_bin-206	MAG	33990618	PRJEB38681	SAMEA6944610	87.69	0	29237	118	2.17959	2.48556049720607	-	-	-	-	N/A	Omnitrophota	Vampiricoccoidia	Fredricksoniimonadales	Fredricksoniimonadaceae	CAJARJ01	CAJARJ01 sp903944345		d__Bacteria;p__Omnitrophota;c__Koll11;o__UBA10015;f__GCA-002753745;g__CAJARJ01;s__CAJARJ01 sp903944345	Switzerland	water
275	GCA_903937685.1	Loc090907-8m_bin-557	MAG	33990618	PRJEB38681	SAMEA6947439	93.9	1.82	13389	219	2.02842	2.12087306773163	18/0				N/A	Omnitrophota	Vampiricoccoidia	Fredricksoniimonadales	Fredricksoniimonadaceae	CAJARJ01	CAJARJ01 sp903944345		d__Bacteria;p__Omnitrophota;c__Koll11;o__UBA10015;f__GCA-002753745;g__CAJARJ01;s__CAJARJ01 sp903944345	Switzerland	water
276	GCA_903940715.1	Loc090907-8-6m_bin-628	MAG	33990618	PRJEB38681	SAMEA6943648	96.36	0.91	34697	101	2.14542	2.20620244707347	18/0	*			N/A	Omnitrophota	Vampiricoccoidia	Fredricksoniimonadales	Fredricksoniimonadaceae	CAJARJ01	CAJARJ01 sp903944345		d__Bacteria;p__Omnitrophota;c__Koll11;o__UBA10015;f__GCA-002753745;g__CAJARJ01;s__CAJARJ01 sp903944345	Switzerland	water
277	GCA_903944345.1	Loc090907-6m_bin-269	MAG	33990618	PRJEB38681	SAMEA6945599	97.27	0	143789	22	2.17624	2.23731983139714	19/0	*	*	*	N/A	Omnitrophota	Vampiricoccoidia	Fredricksoniimonadales	Fredricksoniimonadaceae	CAJARJ01	CAJARJ01 sp903944345		d__Bacteria;p__Omnitrophota;c__Koll11;o__UBA10015;f__GCA-002753745;g__CAJARJ01;s__CAJARJ01 sp903944345	Switzerland	water
278		MAG_0412	MAG		PRJNA375332	SAMN06343860	38.02	1.82	14217	136	1.41406	-	14/1		*	*		Omnitrophota	Vampiricoccoidia	Fredricksoniimonadales	Fredricksoniimonadaceae	Fredricksoniionadaceae gen.	Fredricksoniionadaceae gen. sp. MAG-0412		d__Bacteria;p__Omnitrophota;c__Koll11;o__UBA10015;f__GCA-002753745;g__;s__	Finland: Lake Alinen Mustajarvi	water
279		SAG_3300015400	SAG	33013724	PRJNA406411	SAMN07631837	38.51	0	18630	71	0.793825	-	16/0	*	*	*		Omnitrophota	Vampiricoccoidia	Fredricksoniimonadales	Fredricksoniimonadaceae	Fredricksoniionadaceae gen.	Fredricksoniionadaceae gen. sp. SAG-3300015400		d__Bacteria;p__Omnitrophota;c__Koll11;o__UBA10015;f__GCA-002753745;g__JAAYZZ01;s__	USA: Nevada	water
280	GCA_903860135.1	Umea1p4_bin-199	MAG	33990618	PRJEB38681	SAMEA6947939	97.27	1.82	197393	20	2.0262	2.04515591652102	19/0	*	*	*	N/A	Omnitrophota	Vampiricoccoidia	Fredricksoniimonadales	Fredricksoniimonadaceae	Fredricksoniimonas	Fredricksoniimonas aquilentivivens	Yes	d__Bacteria;p__Omnitrophota;c__Koll11;o__UBA10015;f__GCA-002753745;g__GCA-2753465;s__GCA-2753465 sp903860135	Sweden	water
281	GCA_903822865.1	MJ-2014-D4_bin-263	MAG	33990618	PRJEB38681	SAMEA6944561	97.11	1.98	54114	62	2.37058	2.39279427041499	19/0		*	*	N/A	Omnitrophota	Vampiricoccoidia	Fredricksoniimonadales	Fredricksoniimonadaceae	Fredricksoniimonas	Fredricksoniimonas methanica		d__Bacteria;p__Omnitrophota;c__Koll11;o__UBA10015;f__GCA-002753745;g__GCA-2753465;s__GCA-2753465 sp903901225	Finland	water
282	GCA_903833505.1	MJ-2014-D5_bin-182	MAG	33990618	PRJEB38681	SAMEA6946354	96.45	1.98	75121	48	2.38795	2.42682580715397	19/0	*	*	*	N/A	Omnitrophota	Vampiricoccoidia	Fredricksoniimonadales	Fredricksoniimonadaceae	Fredricksoniimonas	Fredricksoniimonas methanica		d__Bacteria;p__Omnitrophota;c__Koll11;o__UBA10015;f__GCA-002753745;g__GCA-2753465;s__GCA-2753465 sp903901225	Finland	water
283	GCA_903843755.1	MJ-2014-D3_bin-163	MAG	33990618	PRJEB38681	SAMEA6948377	97.27	2.31	30895	117	2.3476	2.35773464192454	19/0				N/A	Omnitrophota	Vampiricoccoidia	Fredricksoniimonadales	Fredricksoniimonadaceae	Fredricksoniimonas	Fredricksoniimonas methanica		d__Bacteria;p__Omnitrophota;c__Koll11;o__UBA10015;f__GCA-002753745;g__GCA-2753465;s__GCA-2753465 sp903901225	Finland	water
284	GCA_903844095.1	MJ4_bin-205	MAG	33990618	PRJEB38681	SAMEA6949198	94.79	3.8	25864	141	2.22996	2.26312859584344	20/1		*	*	N/A	Omnitrophota	Vampiricoccoidia	Fredricksoniimonadales	Fredricksoniimonadaceae	Fredricksoniimonas	Fredricksoniimonas methanica		d__Bacteria;p__Omnitrophota;c__Koll11;o__UBA10015;f__GCA-002753745;g__GCA-2753465;s__GCA-2753465 sp903901225	Finland	water
285	GCA_903853095.1	MJ130916B_bin-422	MAG	33990618	PRJEB38681	SAMEA6949310	97.27	1.98	75121	52	2.38238	2.40075034049553	19/0	*	*	*	N/A	Omnitrophota	Vampiricoccoidia	Fredricksoniimonadales	Fredricksoniimonadaceae	Fredricksoniimonas	Fredricksoniimonas methanica		d__Bacteria;p__Omnitrophota;c__Koll11;o__UBA10015;f__GCA-002753745;g__GCA-2753465;s__GCA-2753465 sp903901225	Finland	water
286	GCA_903901225.1	MJ-2014-D6_bin-075	MAG	33990618	PRJEB38681	SAMEA6947271	97.27	1.98	69321	49	2.37823	2.39656934964532	19/0	*	*	*	N/A	Omnitrophota	Vampiricoccoidia	Fredricksoniimonadales	Fredricksoniimonadaceae	Fredricksoniimonas	Fredricksoniimonas methanica	Yes	d__Bacteria;p__Omnitrophota;c__Koll11;o__UBA10015;f__GCA-002753745;g__GCA-2753465;s__GCA-2753465 sp903901225	Finland	water
287	GCA_903914855.1	MJ130916A_bin-0562	MAG	33990618	PRJEB38681	SAMEA6948693	96.61	1.98	69313	57	2.35113	2.38543911085809	19/0		*	*	N/A	Omnitrophota	Vampiricoccoidia	Fredricksoniimonadales	Fredricksoniimonadaceae	Fredricksoniimonas	Fredricksoniimonas methanica		d__Bacteria;p__Omnitrophota;c__Koll11;o__UBA10015;f__GCA-002753745;g__GCA-2753465;s__GCA-2753465 sp903901225	Finland	water
288	GCA_002753465.1	MBPbin6	MAG	29581530	PRJNA400260	SAMN07556467	68.93	1.82	24179	150	2.18126	3.10685931031481	16/0				14x	Omnitrophota	Vampiricoccoidia	Fredricksoniimonadales	Fredricksoniimonadaceae	Fredricksoniimonas	GCA-2753465 sp002753465		d__Bacteria;p__Omnitrophota;c__Koll11;o__UBA10015;f__GCA-002753745;g__GCA-2753465;s__GCA-2753465 sp002753465	Australia: Mount Beauty Pondage	sediment
289	GCA_903836515.1	AM4_bin-704	MAG	33990618	PRJEB38681	SAMEA6948610	97.27	1.82	58379	67	2.01839	2.03727789760461	18/0				N/A	Omnitrophota	Vampiricoccoidia	Fredricksoniimonadales	Fredricksoniimonadaceae	Fredricksoniimonas	GCA-2753465 sp903836515		d__Bacteria;p__Omnitrophota;c__Koll11;o__UBA10015;f__GCA-002753745;g__GCA-2753465;s__GCA-2753465 sp903836515	Finland	water
290	GCA_903880265.1	AM5_bin-1294	MAG	33990618	PRJEB38681	SAMEA6946542	86.99	1.98	8348	319	1.84895	2.0833954374066	-	-	-	-	N/A	Omnitrophota	Vampiricoccoidia	Fredricksoniimonadales	Fredricksoniimonadaceae	Fredricksoniimonas	GCA-2753465 sp903836515		d__Bacteria;p__Omnitrophota;c__Koll11;o__UBA10015;f__GCA-002753745;g__GCA-2753465;s__GCA-2753465 sp903836515	Finland	water
291	GCA_903884765.1	AM-2014-D5_bin-603	MAG	33990618	PRJEB38681	SAMEA6944756	97.27	1.82	33992	86	1.98106	1.99959765107433	19/0				N/A	Omnitrophota	Vampiricoccoidia	Fredricksoniimonadales	Fredricksoniimonadaceae	Fredricksoniimonas	GCA-2753465 sp903836515		d__Bacteria;p__Omnitrophota;c__Koll11;o__UBA10015;f__GCA-002753745;g__GCA-2753465;s__GCA-2753465 sp903836515	Finland	water
292	GCA_903907505.1	AM-2014-D6_bin-650	MAG	33990618	PRJEB38681	SAMEA6947923	97.11	1.82	13677	220	1.91413	1.9352217236124	19/0				N/A	Omnitrophota	Vampiricoccoidia	Fredricksoniimonadales	Fredricksoniimonadaceae	Fredricksoniimonas	GCA-2753465 sp903836515		d__Bacteria;p__Omnitrophota;c__Koll11;o__UBA10015;f__GCA-002753745;g__GCA-2753465;s__GCA-2753465 sp903836515	Finland	water
293		MAG_0483	MAG		PRJNA375332	SAMN06343860	87.85	0	8919	189	1.41115	1.60631189527604	17/0					Omnitrophota	Vampiricoccoidia	Fredricksoniimonadales	Fredricksoniimonadaceae	Fredricksoniimonas	GCA-2753465 sp903836515		d__Bacteria;p__Omnitrophota;c__Koll11;o__UBA10015;f__GCA-002753745;g__GCA-2753465;s__GCA-2753465 sp903836515	Finland: Lake Alinen Mustajarvi	water
294	GCA_903861305.1	Ki2-D4_bin-0675	MAG	33990618	PRJEB38681	SAMEA6943818	69.09	0	41371	74	1.73614	2.51286582718194	18/0				N/A	Omnitrophota	Vampiricoccoidia	Fredricksoniimonadales	Fredricksoniimonadaceae	Fredricksoniimonas	GCA-2753465 sp903861305		d__Bacteria;p__Omnitrophota;c__Koll11;o__UBA10015;f__GCA-002753745;g__GCA-2753465;s__GCA-2753465 sp903861305	Sweden	water
295	GCA_903959815.1	Loc090907-5m_bin-489	MAG	33990618	PRJEB38681	SAMEA6944621	97.27	6.36	25557	139	1.80932	1.74180026811967	18/2		*	*	N/A	Omnitrophota	Vampiricoccoidia	Fredricksoniimonadales	Fredricksoniimonadaceae	Fredricksoniimonas	GCA-2753465 sp903959815		d__Bacteria;p__Omnitrophota;c__Koll11;o__UBA10015;f__GCA-002753745;g__GCA-2753465;s__GCA-2753465 sp903959815	Switzerland	water
296	GCA_903961635.1	Loc090907-6m_bin-428	MAG	33990618	PRJEB38681	SAMEA6945604	95.45	6.53	41961	121	1.83474	1.79668141718177	-	-	-	-	N/A	Omnitrophota	Vampiricoccoidia	Fredricksoniimonadales	Fredricksoniimonadaceae	Fredricksoniimonas	GCA-2753465 sp903959815		d__Bacteria;p__Omnitrophota;c__Koll11;o__UBA10015;f__GCA-002753745;g__GCA-2753465;s__GCA-2753465 sp903959815	Switzerland	water
297	GCA_002753745.1	Cal1bin1	MAG	29581530	PRJNA400260	SAMN07556460	92.73	0	15133	240	2.54014	2.7392871778281	20/0	*	*	*	23x	Omnitrophota	Vampiricoccoidia	Fredricksoniimonadales	Fredricksoniimonadaceae	GCA-2753745	GCA-2753745 sp002753745		d__Bacteria;p__Omnitrophota;c__Koll11;o__UBA10015;f__GCA-002753745;g__GCA-2753745;s__GCA-2753745 sp002753745	Australia: Lake Catani	sediment
298	GCA_903870605.1	AM-lipid-02-D8_bin-034	MAG	33990618	PRJEB38681	SAMEA6946576	92.56	1.07	8947	324	2.08404	2.2274598258427	18/1				N/A	Omnitrophota	Vampiricoccoidia	Fredricksoniimonadales	Fredricksoniimonadaceae	GCA-2753745	GCA-2753745 sp903908245		d__Bacteria;p__Omnitrophota;c__Koll11;o__UBA10015;f__GCA-002753745;g__GCA-2753745;s__GCA-2753745 sp903908245	Finland	water
299	GCA_903878855.1	AM-lipid-02-D10_bin-0141	MAG	33990618	PRJEB38681	SAMEA6947534	77.27	1.98	6301	400	2.01886	2.56100369121263	-	-	-	-	N/A	Omnitrophota	Vampiricoccoidia	Fredricksoniimonadales	Fredricksoniimonadaceae	GCA-2753745	GCA-2753745 sp903908245		d__Bacteria;p__Omnitrophota;c__Koll11;o__UBA10015;f__GCA-002753745;g__GCA-2753745;s__GCA-2753745 sp903908245	Finland	water
300	GCA_903908245.1	AM-lipid-02-D9_bin-0629	MAG	33990618	PRJEB38681	SAMEA6945290	91.82	1.82	80993	34	2.15982	2.30941664887824	19/0	*	*	*	N/A	Omnitrophota	Vampiricoccoidia	Fredricksoniimonadales	Fredricksoniimonadaceae	GCA-2753745	GCA-2753745 sp903908245		d__Bacteria;p__Omnitrophota;c__Koll11;o__UBA10015;f__GCA-002753745;g__GCA-2753745;s__GCA-2753745 sp903908245	Finland	water
301		IMG_2713897466	SAG	33013724			74.55	5.45	18344	140	1.71478	2.17481107109323	20/2		*	*		Omnitrophota	Vampiricoccoidia	Fredricksoniimonadales	Fredricksoniimonadaceae	IMG-2713897466	IMG-2713897466 sp. IMG-2713897466		d__Bacteria;p__Omnitrophota;c__Koll11;o__UBA10015;f__GCA-002753745;g__;s__	USA: Cold Creek Source, Nevada	groundwater
302	GCA_012514595.1	AS06rmzACSIP_371	MAG	32123542	PRJNA602310	SAMN13894464	91.35	2.15	8724	238	1.47328	1.5781089469075	18/1		*	*	77.68x	Omnitrophota	Vampiricoccoidia	Fredricksoniimonadales	Fredricksoniimonadaceae	JAAYZZ01	JAAYZZ01 sp012514595		d__Bacteria;p__Omnitrophota;c__Koll11;o__UBA10015;f__GCA-002753745;g__JAAYZZ01;s__JAAYZZ01 sp012514595	not applicable	wastewater
303		MAG_0129	MAG		PRJNA367361	SAMN06267035	98.18	14.55	67604	84	2.1616	-	21/3	*				Omnitrophota	Vampiricoccoidia	Fredricksoniimonadales	Fredricksoniimonadaceae	JABDGZ01	JABDGZ01 sp. MAG-0129		d__Bacteria;p__Omnitrophota;c__Koll11;o__UBA10015;f__GCA-002753745;g__JABDGZ01;s__	Netherlands	wastewater
304		MAG_0142	MAG		PRJNA367361	SAMN06267035	67.09	5.62	6279	258	1.54876	2.17873887732896	17/3					Omnitrophota	Vampiricoccoidia	Fredricksoniimonadales	Fredricksoniimonadaceae	JABDGZ01	JABDGZ01 sp. MAG-0142		d__Bacteria;p__Omnitrophota;c__Koll11;o__UBA10015;f__GCA-002753745;g__JABDGZ01;s__	Netherlands	wastewater
305		MAG_0158	MAG		PRJNA367361	SAMN06267035	71.52	0	8843	117	0.917098	1.28229586129754	12/0					Omnitrophota	Vampiricoccoidia	Fredricksoniimonadales	Fredricksoniimonadaceae	JABDGZ01	JABDGZ01 sp. MAG-0158		d__Bacteria;p__Omnitrophota;c__Koll11;o__UBA10015;f__GCA-002753745;g__JABDGZ01;s__	Netherlands	wastewater
306	GCA_013285735.1	BWOrgControl_Nextera71_MAG1	MAG	32156798	PRJNA608716	SAMN14214873	84.05	0	42934	69	1.84463	2.19468411659726	19/1				4.53x	Omnitrophota	Vampiricoccoidia	Fredricksoniimonadales	Fredricksoniimonadaceae	JABDGZ01	JABDGZ01 sp013285735		d__Bacteria;p__Omnitrophota;c__Koll11;o__UBA10015;f__GCA-002753745;g__JABDGZ01;s__JABDGZ01 sp013285735	USA: Massachusetts	soil
307	GCA_013286575.1	BWOrgControl_Nextera26_MAG2	MAG	32156798	PRJNA608716	SAMN14214833	62.56	0	30670	72	1.31958	2.10929987212276	15/0				4.74x	Omnitrophota	Vampiricoccoidia	Fredricksoniimonadales	Fredricksoniimonadaceae	JABDGZ01	JABDGZ01 sp013286575		d__Bacteria;p__Omnitrophota;c__Koll11;o__UBA10015;f__GCA-002753745;g__JABDGZ01;s__JABDGZ01 sp013286575	USA: Massachusetts	soil
308	GCA_013287965.1	BWMinControl_Nextera19_MAG3	MAG	32156798	PRJNA608716	SAMN14214764	68.18	0	55446	50	1.51881	2.22764740393077	16/0				0.81x	Omnitrophota	Vampiricoccoidia	Fredricksoniimonadales	Fredricksoniimonadaceae	JABDGZ01	JABDGZ01 sp013287965		d__Bacteria;p__Omnitrophota;c__Koll11;o__UBA10015;f__GCA-002753745;g__JABDGZ01;s__JABDGZ01 sp013287965	USA: Massachusetts	soil
309		MAG_0153	MAG		PRJNA367361	SAMN06267035	98.18	0	98961	23	1.72077	1.7526655123243	20/1	*	*	*		Omnitrophota	Vampiricoccoidia	Fredricksoniimonadales	Fredricksoniimonadaceae	MAG-0153	MAG-0153 sp. MAG-0153		d__Bacteria;p__Omnitrophota;c__Koll11;o__UBA10015;f__GCA-002753745;g__;s__	Netherlands	wastewater
310		SAG_3300016435	SAG	33013724	PRJNA404722	SAMN07629958	69.5	0	29176	72	1.23325	1.77446618705036	15/1	*				Omnitrophota	Vampiricoccoidia	Fredricksoniimonadales	Fredricksoniimonadaceae	SAG-3300016435	SAG-3300016435 sp. SAG-3300016435		d__Bacteria;p__Omnitrophota;c__Koll11;o__UBA10015;f__GCA-002753745;g__;s__	USA: South Dakota	wastewater
311		3300035698_1100	MAG	34707591	PRJNA33179	Multiple	95.54	3.57	46173	56	1.50565	1.57594	20/0	*				Omnitrophota	Vampiricoccoidia	Fredricksoniimonadales	Candidatus Aceulaceae	Candidatus Aceula	Candidatus Aceula lacicola	No	d__Bacteria;p__Omnitrophota;c__Koll11;o__UBA10015;f__;g__;s__	Antarctica: Ace Lake	water	Not of sufficient quality to pass Bowers et al., 2018 criteria (abssence of rRNA genes).
312		3300035698_985	MAG	34707591	PRJNA33179	Multiple	97.32	0	186988	33	1.91314	1.96583	19/0	*	*	*		Omnitrophota	Vampiricoccoidia	Fredricksoniimonadales	Candidatus Aceulaceae	Candidatus Aceula	Candidatus Aceula meridiana	No	d__Bacteria;p__Omnitrophota;c__Koll11;o__UBA10015;f__;g__;s__	Antarctica: Ace Lake	water	No SSU rRNA genes of sufficient length to pass QC. Williams et al. report all three rRNA genes as present.
313		MAG_1623	MAG		PRJNA367387	SAMN06267238	45.29	2.81	6103	315	1.86815	-	16/0		*	*		Omnitrophota	Vampiricoccoidia	Fredricksoniimonadales	Fredricksoniimonadales fam.	Fredricksoniimonadales fam. gen.	Fredricksoniimonadales fam. gen. sp. MAG-1623		d__Bacteria;p__Omnitrophota;c__Koll11;o__UBA10015;f__;g__;s__	USA: Beatty, Nevada	geothermal spring
314		MAG_0135	MAG		PRJNA367361	SAMN06267035	96.36	9.17	310900	35	1.94855	1.836721917912	21/1	*	*	*		Omnitrophota	Vampiricoccoidia	Fredricksoniimonadales	MAG-0135	MAG-0135	MAG-0135 sp. MAG-0135		d__Bacteria;p__Omnitrophota;c__Koll11;o__UBA10015;f__;g__;s__	Netherlands	wastewater
315	GCA_011051015.1	HyVt-303	MAG	31911466	PRJNA480137	SAMN09638488	65.37	0.53	6408	217	1.22303	1.8610232906532	17/2				11.7x	Omnitrophota	Vampiricoccoidia	Ghiorseimicrobiales	Ghiorseimicrobiaceae	DRER01	DRER01 sp011051015		d__Bacteria;p__Omnitrophota;c__Koll11;o__1-14-0-20-42-13;f__1-14-0-20-42-13;g__DRER01;s__DRER01 sp011051015	Pacific Ocean: Southern Mariana Trough	saline sediment
316	GCA_002796125.1	CG11_big_fil_rev_8_21_14_0_20_42_13	MAG	29379208	PRJNA362739	SAMN06659521	92.73	0	51778	115	1.82535	1.96846004529279	20/0	*	*	*	N/A	Omnitrophota	Vampiricoccoidia	Ghiorseimicrobiales	Ghiorseimicrobiaceae	Ghiorseimicrobium	Ghiorseimicrobium undicola	Yes	d__Bacteria;p__Omnitrophota;c__Koll11;o__1-14-0-20-42-13;f__1-14-0-20-42-13;g__1-14-0-20-42-13;s__1-14-0-20-42-13 sp002796125	USA: Utah, Grand County	groundwater
317	GCA_002796125.1*	IMG_2786546445; CG11_big_fil_rev_8_21_14_0_20_42_13	MAG	29379208	PRJNA362739	SAMN06659521	93.64	0	51778	113	1.82333	1.9471753524135	20/0	*	*	*	-	Omnitrophota	Vampiricoccoidia	Ghiorseimicrobiales	Ghiorseimicrobiaceae	Ghiorseimicrobium	Ghiorseimicrobium undicola		d__Bacteria;p__Omnitrophota;c__Koll11;o__1-14-0-20-42-13;f__1-14-0-20-42-13;g__1-14-0-20-42-13;s__1-14-0-20-42-13 sp002796125	USA: Utah, Grand County	groundwater	IMG metadata suggests a duplicate of GCA_002796125.1, but with two contigs removed.
318		IMG_2713897469	SAG	33013724			70.91	0	21438	78	1.06005	1.49492737272599	18/0					Omnitrophota	Vampiricoccoidia	Profunditerraquicolales	IMG-2713897469	IMG-2713897469	IMG-2713897469 sp. IMG-2713897469		d__Bacteria;p__Omnitrophota;c__Koll11;o__GIF10;f__;g__;s__	USA: Crystal Spring, Nevada, USA	groundwater
319		3300035698_1934	MAG	34707591	PRJNA33179	Multiple	90.18	0	77284	33	1.38458	1.53535	20/0	*	*	*		Omnitrophota	Vampiricoccoidia	Profunditerraquicolales	Gygaeellaceae	Gygaeella	Gygaeella obscura	Yes	d__Bacteria;p__Omnitrophota;c__Koll11;o__GIF10;f__;g__;s__	Antarctica: Ace Lake	water
320	GCA_001805765.1	RIFCSPLOWO2_01_FULL_41_12	MAG	29364876, 27774985, 26844018, 28077924	PRJNA288027	SAMN04315137	70.91	0	17756	52	0.704252	0.993163164574813	16/2				N/A	Omnitrophota	Vampiricoccoidia	Profunditerraquicolales	Profunditerraquicolaceae	2-01-FULL-41-12	2-01-FULL-41-12 sp001805765		d__Bacteria;p__Omnitrophota;c__Koll11;o__GIF10;f__UBA6249;g__2-01-FULL-41-12;s__2-01-FULL-41-12 sp001805765	USA: Rifle, Colorado	groundwater
321	GCA_903852325.1	AM-2014-D7_bin-608	MAG	33990618	PRJEB38681	SAMEA6945353	95.45	0	19786	123	1.63341	1.71127710843373	21/2	*	*	*	N/A	Omnitrophota	Vampiricoccoidia	Profunditerraquicolales	Profunditerraquicolaceae	Amyimicrobium	Amyimicrobium silvilacustre		d__Bacteria;p__Omnitrophota;c__Koll11;o__GIF10;f__UBA6249;g__UBA6249;s__UBA6249 sp903852325	Finland	water
322	GCA_903874485.1	AM-2014-D6_bin-320	MAG	33990618	PRJEB38681	SAMEA6947907	85.45	3.64	9259	244	1.71396	1.93279327794032	-	-	-	-	N/A	Omnitrophota	Vampiricoccoidia	Profunditerraquicolales	Profunditerraquicolaceae	Amyimicrobium	Amyimicrobium silvilacustre		d__Bacteria;p__Omnitrophota;c__Koll11;o__GIF10;f__UBA6249;g__UBA6249;s__UBA6249 sp903852325	Finland	water
323	GCA_903908145.1	AM5_bin-1039	MAG	33990618	PRJEB38681	SAMEA6946534	90.99	0.17	12536	194	1.64291	1.80252012287065	21/2		*	*	N/A	Omnitrophota	Vampiricoccoidia	Profunditerraquicolales	Profunditerraquicolaceae	Amyimicrobium	Amyimicrobium silvilacustre		d__Bacteria;p__Omnitrophota;c__Koll11;o__GIF10;f__UBA6249;g__UBA6249;s__UBA6249 sp903852325	Finland	water
324		MAG_0414	MAG		PRJNA375332	SAMN06343860	95.45	1.82	488311	30	1.93562	1.99098033965427	21/4	*	*	*		Omnitrophota	Vampiricoccoidia	Profunditerraquicolales	Profunditerraquicolaceae	Amyimicrobium	Amyimicrobium silvilacustre	Yes	d__Bacteria;p__Omnitrophota;c__Koll11;o__GIF10;f__UBA6249;g__UBA6249;s__UBA6249 sp903852325	Finland: Lake Alinen Mustajarvi	water
325	GCA_002787115.1	CG11_big_fil_rev_8_21_14_0_20_43_6	MAG	29379208	PRJNA362739	SAMN06659522	79.28	0	5049	268	1.15744	1.45993440968718	12/0				N/A	Omnitrophota	Vampiricoccoidia	Profunditerraquicolales	Profunditerraquicolaceae	Amyimicrobium	Amyimicrobium sp. GCA-002787115-1		d__Bacteria;p__Omnitrophota;c__Koll11;o__GIF10;f__UBA6249;g__UBA6249;s__	USA: Utah, Grand County	groundwater
326	GCA_002787115.1*	IMG_2786546439; CG11_big_fil_rev_8_21_14_0_20_43_6	MAG	29379208	PRJNA362739	SAMN06659522	79.28	0	5049	268	1.15744	1.45993440968718	12/0				-	Omnitrophota	Vampiricoccoidia	Profunditerraquicolales	Profunditerraquicolaceae	Amyimicrobium	Amyimicrobium sp. GCA-002787115-1		d__Bacteria;p__Omnitrophota;c__Koll11;o__GIF10;f__UBA6249;g__UBA6249;s__	USA: Utah, Grand County	groundwater	Duplicate of GCA_002787115.1
327		MAG_1429	MAG		PRJNA368343	SAMN06269224	46.56	8.51	4974	99	0.482309	-	11/0		*	*		Omnitrophota	Vampiricoccoidia	Profunditerraquicolales	Profunditerraquicolaceae	Amyimicrobium	Amyimicrobium sp. MAG-1429		d__Bacteria;p__Omnitrophota;c__Koll11;o__GIF10;f__UBA6249;g__UBA6249;s__	Canada: British Columbia	water
328		SAG_3300015963	SAG	33013724	PRJNA406600	SAMN07631949	26.61	0	30775	27	0.497083	-	5/0	*	*	*		Omnitrophota	Vampiricoccoidia	Profunditerraquicolales	Profunditerraquicolaceae	Amyimicrobium	Amyimicrobium sp. SAG-3300015963		d__Bacteria;p__Omnitrophota;c__Koll11;o__GIF10;f__UBA6249;g__UBA6249;s__	USA: South Dakota	wastewater
329	GCA_002441245.1	UBA6253	MAG	28894102	PRJNA348753	SAMN06451218	95.45	0	297952	12	1.60913	1.6858313253012	20/0		*	*	19.28x	Omnitrophota	Vampiricoccoidia	Profunditerraquicolales	Profunditerraquicolaceae	Amyimicrobium	UBA6249 sp002441245		d__Bacteria;p__Omnitrophota;c__Koll11;o__GIF10;f__UBA6249;g__UBA6249;s__UBA6249 sp002441245	Canada: Medicine Hat Glauconitic field	wastewater
330	GCA_002441305.1	UBA6249	MAG	28894102	PRJNA348753	SAMN06455981	68.18	0	249935	14	1.31358	1.92663244353183	21/1		*	*	19.75x	Omnitrophota	Vampiricoccoidia	Profunditerraquicolales	Profunditerraquicolaceae	Amyimicrobium	UBA6249 sp002441305		d__Bacteria;p__Omnitrophota;c__Koll11;o__GIF10;f__UBA6249;g__UBA6249;s__UBA6249 sp002441305	Canada: Medicine Hat Glauconitic field	wastewater
331	GCA_002796135.1	CG11_big_fil_rev_8_21_14_0_20_41_12	MAG	29379208	PRJNA362739	SAMN06659520	93.64	0	35140	57	1.22266	1.30570803075609	19/2	*			N/A	Omnitrophota	Vampiricoccoidia	Profunditerraquicolales	Profunditerraquicolaceae	Amyimicrobium	UBA6249 sp002796135		d__Bacteria;p__Omnitrophota;c__Koll11;o__GIF10;f__UBA6249;g__UBA6249;s__UBA6249 sp002796135	USA: Utah, Grand County	groundwater
332	GCA_002796135.1*	IMG_2786546446; CG11_big_fil_rev_8_21_14_0_20_41_12	MAG	29379208	PRJNA362739	SAMN06659520	93.64	0	35140	57	1.22266	1.30570803075609	19/2	*			-	Omnitrophota	Vampiricoccoidia	Profunditerraquicolales	Profunditerraquicolaceae	Amyimicrobium	UBA6249 sp002796135		d__Bacteria;p__Omnitrophota;c__Koll11;o__GIF10;f__UBA6249;g__UBA6249;s__UBA6249 sp002796135	USA: Utah, Grand County	groundwater	Duplicate of GCA_002796135.1
333	GCA_004298075.1	FW104_bin.10	MAG	32252814	PRJNA514088	SAMN10720138	83.55	2.15	5939	272	1.31776	1.54330003770197	17/0					Omnitrophota	Vampiricoccoidia	Profunditerraquicolales	Profunditerraquicolaceae	Amyimicrobium	UBA6249 sp004298075		d__Bacteria;p__Omnitrophota;c__Koll11;o__GIF10;f__UBA6249;g__UBA6249;s__UBA6249 sp004298075	USA: Tennessee	groundwater
334	GCA_903880505.1	AM-lipid-02-D10_bin-0571	MAG	33990618	PRJEB38681	SAMEA6947548	95.45	3.64	9615	164	1.12688	1.1376214151912	17/1				N/A	Omnitrophota	Vampiricoccoidia	Profunditerraquicolales	Profunditerraquicolaceae	Amyimicrobium	UBA6249 sp903907475		d__Bacteria;p__Omnitrophota;c__Koll11;o__GIF10;f__UBA6249;g__UBA6249;s__UBA6249 sp903907475	Finland	water
335	GCA_903907475.1	AM-lipid-02-D9_bin-0621	MAG	33990618	PRJEB38681	SAMEA6945289	91.45	3.64	8210	196	1.19295	1.25699697014762	17/0		*	*	N/A	Omnitrophota	Vampiricoccoidia	Profunditerraquicolales	Profunditerraquicolaceae	Amyimicrobium	UBA6249 sp903907475		d__Bacteria;p__Omnitrophota;c__Koll11;o__GIF10;f__UBA6249;g__UBA6249;s__UBA6249 sp903907475	Finland	water
336	GCA_003644385.1	B70_G16	MAG	31015394	PRJNA362212	SAMN09214962	90	4.46	14723	175	1.73967	1.84675741488889	19/2				42.55x	Omnitrophota	Vampiricoccoidia	Profunditerraquicolales	Profunditerraquicolaceae	B70-G16	B70-G16 sp003644385		d__Bacteria;p__Omnitrophota;c__Koll11;o__GIF10;f__UBA6249;g__B70-G16;s__B70-G16 sp003644385	Mexico: Guaymas Basin, Gulf of California	saline sediment
337	GCA_903882345.1	A4_bin-512	MAG	33990618	PRJEB38681	SAMEA6949052	82.56	0.83	7450	218	1.24972	1.50114263226744	14/0				N/A	Omnitrophota	Vampiricoccoidia	Profunditerraquicolales	Profunditerraquicolaceae	CAIRWO01	CAIRWO01 sp903882345		d__Bacteria;p__Omnitrophota;c__Koll11;o__GIF10;f__UBA6249;g__CAIRWO01;s__CAIRWO01 sp903882345	Canada	water
338	GCA_011370105.1	SpSt-531	MAG	31911466	PRJNA480137	SAMN09639638	93.64	0	31039	81	1.67152	1.78505126014524	21/1	*	*	*	9.38x	Omnitrophota	Vampiricoccoidia	Profunditerraquicolales	Profunditerraquicolaceae	DSWQ01	DSWQ01 sp011370105		d__Bacteria;p__Omnitrophota;c__Koll11;o__GIF10;f__UBA6249;g__DSWQ01;s__DSWQ01 sp011370105	Canada: British Columbia	geothermal spring
339		MAG_0904	MAG		PRJNA375326	SAMN06343854	76.12	0	8624	187	1.36855	1.79788229111929	18/1	*	*	*		Omnitrophota	Vampiricoccoidia	Profunditerraquicolales	Profunditerraquicolaceae	DSWQ01	DSWQ01 sp011370105		d__Bacteria;p__Omnitrophota;c__Koll11;o__GIF10;f__UBA6249;g__DSWQ01;s__DSWQ01 sp011370105	Canada: British Columbia	geothermal spring
340	GCA_011333545.1	SpSt-851	MAG	31911466	PRJNA480137	SAMN09639993	93.47	0	13540	131	1.40518	1.50335187760779	16/0	*	*	*	18.96x	Omnitrophota	Vampiricoccoidia	Profunditerraquicolales	Profunditerraquicolaceae	Fontincolimonas	Fontincolimonas calida	Yes	d__Bacteria;p__Omnitrophota;c__Koll11;o__GIF10;f__UBA6249;g__DTKH01;s__DTKH01 sp011333545	USA: Yellowstone National Park	geothermal spring
341	GCA_001805485.1	RBG_13_44_8b	MAG	29364876, 27774985, 26844018, 28077925	PRJNA288027	SAMN04316272	66.36	1.82	13766	113	1.3807	2.04275503586498	17/2	*			N/A	Omnitrophota	Vampiricoccoidia	Profunditerraquicolales	Profunditerraquicolaceae	GCA-001805485-1	GCA-001805485-1 sp. GCA-001805485-1		d__Bacteria;p__Omnitrophota;c__Koll11;o__GIF10;f__UBA6249;g__;s__	USA: Rifle, Colorado	soil
342		JZ_4.bins.180.201808	MAG				90.96	0	14519	147	1.5655	1.72108399296394	19/0					Omnitrophota	Vampiricoccoidia	Profunditerraquicolales	Profunditerraquicolaceae	JZ-4-180-201808	JZ-4-180-201808 sp. JZ-4-180-201808		d__Bacteria;p__Omnitrophota;c__Koll11;o__GIF10;f__UBA6249;g__;s__	China: Jinze Spring, Tengchong	geothermal spring
343		MAG_0144	MAG		PRJNA367361	SAMN06267035	71.16	0.17	7565	166	1.13225	1.58843053906689	15/1	*				Omnitrophota	Vampiricoccoidia	Profunditerraquicolales	Profunditerraquicolaceae	MAG-0144	MAG-0144 sp. MAG-0144		d__Bacteria;p__Omnitrophota;c__Koll11;o__GIF10;f__UBA6249;g__;s__	Netherlands	wastewater
344		MAG_0161	MAG		PRJNA367361	SAMN06267035	62.69	9.09	6331	218	1.28972	1.87028799314085	13/0	*	*	*		Omnitrophota	Vampiricoccoidia	Profunditerraquicolales	Profunditerraquicolaceae	MAG-0161	MAG-0161 sp. MAG-0161		d__Bacteria;p__Omnitrophota;c__Koll11;o__GIF10;f__UBA6249;g__;s__	Netherlands	wastewater
345		MAG_1168	MAG		PRJNA364991	SAMN06264666	79.09	0	14959	67	0.744561	0.941409786319383	15/2	*	*	*		Omnitrophota	Vampiricoccoidia	Profunditerraquicolales	Profunditerraquicolaceae	MAG-1168	MAG-1168 sp. MAG-1168		d__Bacteria;p__Omnitrophota;c__Koll11;o__GIF10;f__UBA6249;g__;s__	Rwanda: Lake Kivu	water
346		MAG_1215	MAG		PRJNA364991	SAMN06264666	82.73	1.98	11771	84	0.848992	1.00590107385471	15/0					Omnitrophota	Vampiricoccoidia	Profunditerraquicolales	Profunditerraquicolaceae	MAG-1215	MAG-1215 sp. MAG-1215		d__Bacteria;p__Omnitrophota;c__Koll11;o__GIF10;f__UBA6249;g__;s__	Rwanda: Lake Kivu	water
347		MAG_1427	MAG		PRJNA368343	SAMN06269224	88.18	6.73	11335	160	1.39388	1.47433448083466	18/1		*	*		Omnitrophota	Vampiricoccoidia	Profunditerraquicolales	Profunditerraquicolaceae	MAG-1427	MAG-1427 sp. MAG-1427		d__Bacteria;p__Omnitrophota;c__Koll11;o__GIF10;f__UBA6249;g__;s__	Canada: British Columbia	water
348		MAG_1468	MAG		PRJNA368343	SAMN06269224	90	1.82	58356	50	1.55409	1.695342786	20/0	*	*	*		Omnitrophota	Vampiricoccoidia	Profunditerraquicolales	Profunditerraquicolaceae	MAG-1468	MAG-1468 sp. MAG-1468		d__Bacteria;p__Omnitrophota;c__Koll11;o__GIF10;f__UBA6249;g__;s__	Canada: British Columbia	water
349	GCA_001805895.1	RIFCSPLOWO2_12_FULL_51_8	MAG	29364876, 27774985, 26844018, 28077926	PRJNA288027	SAMN04315826	66.2	0	13764	79	0.936235	1.41425226586103	12/0		*	*	N/A	Omnitrophota	Vampiricoccoidia	Profunditerraquicolales	Profunditerraquicolaceae	O2-12-FULL-51-8	O2-12-FULL-51-8 sp001805895		d__Bacteria;p__Omnitrophota;c__Koll11;o__GIF10;f__UBA6249;g__O2-12-FULL-51-8;s__O2-12-FULL-51-8 sp001805895	USA: Rifle, Colorado	soil
350	GCA_003598025.1	SURF_18	MAG	28644444	PRJNA355136	SAMN08499012	95.45	0	408832	10	1.68775	1.76820010476689	19/0	*	*	*	20x	Omnitrophota	Vampiricoccoidia	Profunditerraquicolales	Profunditerraquicolaceae	Profunditerraquicola	Profunditerraquicola sanfordiae	Yes	d__Bacteria;p__Omnitrophota;c__Koll11;o__GIF10;f__UBA6249;g__SURF-18;s__SURF-18 sp003598025	USA: South Dakota, Sanford Underground Research Facility	groundwater
351	GCA_001304135.1	SM23_72	MAG	26824177	PRJNA270657	SAMN03994219	92.73	81.79	33103	122	2.73046	-	20/1	*			120x	Omnitrophota	Vampiricoccoidia	Profunditerraquicolales	Profunditerraquicolaceae	Profunditerraquicolaceae gen.	Profunditerraquicolaceae gen. sp. GCA-001304135-1		d__Bacteria;p__Omnitrophota;c__Koll11;o__GIF10;f__UBA6249;g__;s__	USA: White Oak River estuary, North Carolina	saline sediment
352		IMG_2698536974	SAG		PRJNA403008	SAMN10774950	35.7	0	7211	167	1.05833	-	11/0	*	*	*		Omnitrophota	Vampiricoccoidia	Profunditerraquicolales	Profunditerraquicolaceae	Profunditerraquicolaceae gen.	Profunditerraquicolaceae gen. sp. IMG-2698536974		d__Bacteria;p__Omnitrophota;c__Koll11;o__GIF10;f__UBA6249;g__;s__	USA: Crystal Geyser near Green River, Utah	water
353		MAG_1261	MAG		PRJNA368343	SAMN06269224	50.83	2.64	5047	151	0.75267	1.44166734605548	10/0		*	*		Omnitrophota	Vampiricoccoidia	Profunditerraquicolales	Profunditerraquicolaceae	Profunditerraquicolaceae gen.	Profunditerraquicolaceae gen. sp. MAG-1261		d__Bacteria;p__Omnitrophota;c__Koll11;o__GIF10;f__UBA6249;g__;s__	Canada: British Columbia	water
354		QZM4_2.bins.78.Tibie	MAG				38.35	3.64	4178	137	0.578193	-	10/0					Omnitrophota	Vampiricoccoidia	Profunditerraquicolales	Profunditerraquicolaceae	Profunditerraquicolaceae gen.	Profunditerraquicolaceae gen. sp. QZM4-2-78		d__Bacteria;p__Omnitrophota;c__Koll11;o__GIF10;f__UBA6249;g__;s__	China: Tengchong	geothermal spring
355		SAG_3300015395	SAG	33013724	PRJNA406403	SAMN07631830	21.74	0	9873	115	0.774237	-	8/0	*	*	*		Omnitrophota	Vampiricoccoidia	Profunditerraquicolales	Profunditerraquicolaceae	Profunditerraquicolaceae gen.	Profunditerraquicolaceae gen. sp. SAG-3300015395		d__Bacteria;p__Omnitrophota;c__Koll11;o__GIF10;f__UBA6249;g__;s__	USA: Nevada	water
356		SAG_3300015396	SAG	33013724	PRJNA406429	SAMN07631854	37.27	1.82	13513	76	0.733239	-	9/1	*	*			Omnitrophota	Vampiricoccoidia	Profunditerraquicolales	Profunditerraquicolaceae	Profunditerraquicolaceae gen.	Profunditerraquicolaceae gen. sp. SAG-3300015396		d__Bacteria;p__Omnitrophota;c__Koll11;o__GIF10;f__UBA6249;g__UBA1562;s__	USA: Nevada	water
357		SAG_3300015397	SAG	33013724	PRJNA406427	SAMN07631852	38.68	0	9696	102	0.734879	-	12/1	*				Omnitrophota	Vampiricoccoidia	Profunditerraquicolales	Profunditerraquicolaceae	Profunditerraquicolaceae gen.	Profunditerraquicolaceae gen. sp. SAG-3300015397		d__Bacteria;p__Omnitrophota;c__Koll11;o__GIF10;f__UBA6249;g__;s__	USA: Nevada	water
358		SAG_3300015401	SAG	33013724	PRJNA406431	SAMN07631856	26.36	0	15266	79	0.841787	-	10/0	*				Omnitrophota	Vampiricoccoidia	Profunditerraquicolales	Profunditerraquicolaceae	Profunditerraquicolaceae gen.	Profunditerraquicolaceae gen. sp. SAG-3300015401		d__Bacteria;p__Omnitrophota;c__Koll11;o__GIF10;f__UBA6249;g__CAIRWO01;s__	USA: Nevada	water
359		QZM4_1.bins.76.Tibie	MAG				90	2.89	9549	136	1.10903	1.196639054	17/0					Omnitrophota	Vampiricoccoidia	Profunditerraquicolales	Profunditerraquicolaceae	QZM4-1-76	QZM4-1-76 sp. QZM4-1-76		d__Bacteria;p__Omnitrophota;c__Koll11;o__GIF10;f__UBA6249;g__;s__	China: Tengchong	geothermal spring
360		QZM4_1.bins.77.Tibie	MAG				96.36	0	28981	57	1.2509	1.29815379825654	19/1		*	*		Omnitrophota	Vampiricoccoidia	Profunditerraquicolales	Profunditerraquicolaceae	QZM4-1-77	QZM4-1-77 sp. QZM4-1-77		d__Bacteria;p__Omnitrophota;c__Koll11;o__GIF10;f__UBA6249;g__;s__	China: Tengchong	geothermal spring
361		QZM4_2.bins.442.Tibie	MAG				75.87	0.61	6289	194	1.11225	1.45705320798735	15/0		*	*		Omnitrophota	Vampiricoccoidia	Profunditerraquicolales	Profunditerraquicolaceae	QZM4-2-442	QZM4-2-442 sp. QZM4-2-442		d__Bacteria;p__Omnitrophota;c__Koll11;o__GIF10;f__;g__;s__	China: Tengchong	geothermal spring
362	GCA_001805465.1	RBG_13_41_10	MAG	29364876, 27774985, 26844018, 28077927	PRJNA288027	SAMN04314287	84.63	0	90705	22	1.29887	1.53476544960416	16/2	*	*	*	N/A	Omnitrophota	Vampiricoccoidia	Profunditerraquicolales	Profunditerraquicolaceae	RBG-13-41-10	RBG-13-41-10 sp001805465		d__Bacteria;p__Omnitrophota;c__Koll11;o__GIF10;f__UBA6249;g__RBG-13-41-10;s__RBG-13-41-10 sp001805465	USA: Rifle, Colorado	soil
363		SAG_3300015412	SAG	33013724	PRJNA406394	SAMN07631822	51.8	0	18807	82	0.985301	1.90212548262548	16/2	*				Omnitrophota	Vampiricoccoidia	Profunditerraquicolales	Profunditerraquicolaceae	SAG-3300015412	SAG-3300015412 sp. SAG-3300015412		d__Bacteria;p__Omnitrophota;c__Koll11;o__GIF10;f__UBA6249;g__;s__	USA: Nevada	water
364		SAG_3300015419	SAG	33013724	PRJNA406420	SAMN07631845	66.2	1.82	35415	63	1.22637	1.81880081389728	16/0					Omnitrophota	Vampiricoccoidia	Profunditerraquicolales	Profunditerraquicolaceae	SAG-3300015419	SAG-3300015419 sp. SAG-3300015419		d__Bacteria;p__Omnitrophota;c__Koll11;o__GIF10;f__UBA6249;g__;s__	USA: Nevada	water
365		SAG_3300016438	SAG	33013724	PRJNA406605	SAMN07631952	65.45	0	45654	54	1.27116	1.94217723453018	14/0	*				Omnitrophota	Vampiricoccoidia	Profunditerraquicolales	Profunditerraquicolaceae	SAG-3300016438	SAG-3300016438 sp. SAG-3300016438		d__Bacteria;p__Omnitrophota;c__Koll11;o__GIF10;f__UBA6249;g__;s__	USA: South Dakota	wastewater
366	GCA_005239725.1	Bin_37_1_1	MAG	30674352	PRJNA414404	SAMN08774424	80.91	1.82	36410	63	1.45633	1.76717568730688	15/0				30x	Omnitrophota	Vampiricoccoidia	Profunditerraquicolales	Profunditerraquicolaceae	SBBM01	SBBM01 sp005239725		d__Bacteria;p__Omnitrophota;c__Koll11;o__GIF10;f__UBA6249;g__SBBM01;s__SBBM01 sp005239725	Italy: Trento, Comano Thermal Spring	groundwater
367	GCA_003598135.1	SURF_25	MAG	28644444	PRJNA355136	SAMN08499019	92.73	0	49047	36	1.45655	1.57074193896258	16/0		*		20x	Omnitrophota	Vampiricoccoidia	Profunditerraquicolales	Profunditerraquicolaceae	SURF-25	SURF-25 sp003598135		d__Bacteria;p__Omnitrophota;c__Koll11;o__GIF10;f__UBA6249;g__SURF-25;s__SURF-25 sp003598135	USA: South Dakota, Sanford Underground Research Facility	groundwater
368		MAG_1237	MAG		PRJNA364991	SAMN06264666	70.74	0	5815	197	1.1316	1.59965790217699	16/0	*				Omnitrophota	Vampiricoccoidia	Profunditerraquicolales	Profunditerraquicolaceae	Sherwoodlollariibacterium	Sherwoodlollariibacteriaceae sp. MAG-1237		d__Bacteria;p__Omnitrophota;c__Koll11;o__GIF10;f__UBA6249;g__GCA-002774445;s__	Rwanda: Lake Kivu	water
369	GCA_002771995.1	CG23_combo_of_CG06-09_8_20_14_all_41_10	MAG	29379208	PRJNA362739	SAMN06659691	93.64	3.64	12218	190	1.34722	1.38635017214865	18/0	*	*	*	N/A	Omnitrophota	Vampiricoccoidia	Profunditerraquicolales	Profunditerraquicolaceae	Sherwoodlollariibacterium	Sherwoodlollariibacterium unditelluris	Yes	d__Bacteria;p__Omnitrophota;c__Koll11;o__GIF10;f__UBA6249;g__GCA-002774445;s__GCA-002774445 sp002774445	USA: Utah, Grand County	groundwater
370	GCA_002774445.1	CG08_land_8_20_14_0_20_41_16	MAG	29379208	PRJNA362739	SAMN06659287	84.55	3.64	14072	98	1.18457	1.35003266185689	17/0		*	*	N/A	Omnitrophota	Vampiricoccoidia	Profunditerraquicolales	Profunditerraquicolaceae	Sherwoodlollariibacterium	Sherwoodlollariibacterium unditelluris		d__Bacteria;p__Omnitrophota;c__Koll11;o__GIF10;f__UBA6249;g__GCA-002774445;s__GCA-002774445 sp002774445	USA: Utah, Grand County	groundwater
371	GCA_002771995.1*	IMG_2786546427; CG23_combo_of_CG06-09_8_20_14_all_41_10	MAG	29379208	PRJNA362739	SAMN06659691	93.64	3.64	12218	188	1.3452	1.38427561255874	18/0	*	*	*	-	Omnitrophota	Vampiricoccoidia	Profunditerraquicolales	Profunditerraquicolaceae	Sherwoodlollariibacterium	Sherwoodlollariibacterium unditelluris		d__Bacteria;p__Omnitrophota;c__Koll11;o__GIF10;f__UBA6249;g__GCA-002774445;s__GCA-002774445 sp002774445	USA: Utah, Grand County	groundwater	Duplicate of GCA_002771995.1
372	GCA_002774445.1*	IMG_2786546448; CG08_land_8_20_14_0_20_41_16	MAG	29379208	PRJNA362739	SAMN06659287	84.55	3.64	14072	98	1.18457	1.35003266185689	17/0		*	*	-	Omnitrophota	Vampiricoccoidia	Profunditerraquicolales	Profunditerraquicolaceae	Sherwoodlollariibacterium	Sherwoodlollariibacterium unditelluris		d__Bacteria;p__Omnitrophota;c__Koll11;o__GIF10;f__UBA6249;g__GCA-002774445;s__GCA-002774445 sp002774445	USA: Utah, Grand County	groundwater	Duplicate of GCA_002774445.1
373	GCA_002322525.1	UBA1562	MAG	28894102	PRJNA348753	SAMN06456192	72	0	10626	159	1.39886	1.94286111111111	15/1		*	*	30.01x	Omnitrophota	Vampiricoccoidia	Profunditerraquicolales	Profunditerraquicolaceae	UBA1562	UBA1562 sp002322525		d__Bacteria;p__Omnitrophota;c__Koll11;o__GIF10;f__UBA6249;g__UBA1562;s__UBA1562 sp002322525	USA: Crystal Geyser near Green River, Utah	water
374	GCA_002771195.1	CG23_combo_of_CG06-09_8_20_14_all_40_11	MAG	29379208	PRJNA362739	SAMN06659690	87.85	1.82	12950	149	1.4245	1.59200574319863	17/4		*	*	N/A	Omnitrophota	Vampiricoccoidia	Profunditerraquicolales	Profunditerraquicolaceae	UBA1562	UBA1562 sp002322525		d__Bacteria;p__Omnitrophota;c__Koll11;o__GIF10;f__UBA6249;g__UBA1562;s__UBA1562 sp002322525	USA: Utah, Grand County	groundwater
375	GCA_002771195.1*	IMG_2786546429; CG23_combo_of_CG06-09_8_20_14_all_40_11	MAG	29379208	PRJNA362739	SAMN06659690	87.85	1.82	12950	149	1.4245	1.59200574319863	17/2		*	*	-	Omnitrophota	Vampiricoccoidia	Profunditerraquicolales	Profunditerraquicolaceae	UBA1562	UBA1562 sp002322525		d__Bacteria;p__Omnitrophota;c__Koll11;o__GIF10;f__UBA6249;g__UBA1562;s__UBA1562 sp002322525	USA: Utah, Grand County	groundwater	Duplicate of GCA_002771195.1
376	GCA_002440965.1	UBA6233	MAG	28894102	PRJNA348753	SAMN06450462	93.64	0	59407	39	1.59475	1.70306172575822	20/0		*		30x	Omnitrophota	Vampiricoccoidia	Profunditerraquicolales	Profunditerraquicolaceae	UBA6233	UBA6233 sp002440965		d__Bacteria;p__Omnitrophota;c__Koll11;o__GIF10;f__UBA6249;g__UBA6233;s__UBA6233 sp002440965	Canada: Medicine Hat Glauconitic field	wastewater
377	GCA_011620275.1	WOFB22	MAG		PRJNA592873	SAMN13475819	92.73	3.64	63632	36	1.47645	1.53424697508897	20/1	*			80.44x	Omnitrophota	Vampiricoccoidia	Profunditerraquicolales	Profunditerraquicolaceae	Undivivens	UBA5776 sp011620275		d__Bacteria;p__Omnitrophota;c__Koll11;o__GIF10;f__UBA6249;g__UBA5776;s__UBA5776 sp011620275	Germany: Wietze	soil
378	GCA_002418595.1	UBA5776	MAG	28894102	PRJNA348753	SAMN06454245	91.9	0	14279	131	1.39788	1.52108487486398	20/6				9.67x	Omnitrophota	Vampiricoccoidia	Profunditerraquicolales	Profunditerraquicolaceae	Undivivens	Undivivens industriae		d__Bacteria;p__Omnitrophota;c__Koll11;o__GIF10;f__UBA6249;g__UBA5776;s__UBA5776 sp002418595	Canada: Northern Alberta	wastewater
379	GCA_002452395.1	UBA6797	MAG	28894102	PRJNA348753	SAMN06454977	67.27	0	113422	19	1.27269	1.8919191318567	18/1				111.5x	Omnitrophota	Vampiricoccoidia	Profunditerraquicolales	Profunditerraquicolaceae	Undivivens	Undivivens industriae		d__Bacteria;p__Omnitrophota;c__Koll11;o__GIF10;f__UBA6249;g__UBA5776;s__UBA5776 sp002418595	Canada: Medicine Hat Glauconitic field	wastewater
380	GCA_012514745.1	AS06rmzACSIP_339	MAG	32123542	PRJNA602310	SAMN13894456	94.55	0	85350	31	1.54746	1.63665573770492	20/2	*	*	*	267.74x	Omnitrophota	Vampiricoccoidia	Profunditerraquicolales	Profunditerraquicolaceae	Undivivens	Undivivens industriae	Yes	d__Bacteria;p__Omnitrophota;c__Koll11;o__GIF10;f__UBA6249;g__UBA5776;s__UBA5776 sp002418595	not applicable	wastewater
381		SAG_3300015935	SAG	33013724	PRJNA404740	SAMN07630243	25.45	0	5619	75	0.342843	-	4/0					Omnitrophota	Vampiricoccoidia	Profunditerraquicolales	Profunditerraquicolales fam.	Profunditerraquicolales fam. gen.	Profunditerraquicolales fam. gen. sp. SAG-3300015935		d__Bacteria;p__Omnitrophota;c__Koll11;o__GIF10;f__UBA2593;g__UBA2593;s__	South Africa: Free State	groundwater
382		SAG_3300016123	SAG		PRJNA406451	SAMN07630227	29.09	1.82	8067	88	0.580259	-	11/0					Omnitrophota	Vampiricoccoidia	Profunditerraquicolales	Profunditerraquicolales fam.	Profunditerraquicolales fam. gen.	Profunditerraquicolales fam. gen. sp. SAG-3300016123		d__Bacteria;p__Omnitrophota;c__Koll11;o__GIF10;f__UBA2593;g__UBA2593;s__	South Africa: Free State	groundwater
383		SAG_3300016162	SAG	33013724	PRJNA406457	SAMN07631876	41.16	0	10753	82	0.64752	-	12/2					Omnitrophota	Vampiricoccoidia	Profunditerraquicolales	Profunditerraquicolales fam.	Profunditerraquicolales fam. gen.	Profunditerraquicolales fam. gen. sp. SAG-3300016162		d__Bacteria;p__Omnitrophota;c__Koll11;o__GIF10;f__UBA2593;g__UBA2593;s__	South Africa: Free State	groundwater
384		SAG_3300016525	SAG	33013724	PRJNA406444	SAMN07631866	40	0	8099	91	0.557189	-	5/0					Omnitrophota	Vampiricoccoidia	Profunditerraquicolales	Profunditerraquicolales fam.	Profunditerraquicolales fam. gen.	Profunditerraquicolales fam. gen. sp. SAG-3300016525		d__Bacteria;p__Omnitrophota;c__Koll11;o__GIF10;f__UBA2593;g__UBA2593;s__	South Africa: Free State	groundwater
385		QZM4_1.bins.127.Tibie	MAG				90.91	2.15	13351	119	1.16286	1.25162861566384	19/0		*	*		Omnitrophota	Vampiricoccoidia	Profunditerraquicolales	QZM4-1-127	QZM4-1-127	QZM4-1-127 sp. QZM4-1-127		d__Bacteria;p__Omnitrophota;c__Koll11;o__GIF10;f__;g__;s__	China: Tengchong	geothermal spring
386		QZM4_1.bins.405.Tibie	MAG				29.92	1.82	3948	81	0.311754	-	3/0					Omnitrophota	Vampiricoccoidia	Profunditerraquicolales	QZM4-1-127	QZM4-1-127 gen.	QZM4-1-127 gen. sp. QZM4-1-405		d__Bacteria;p__Omnitrophota;c__Koll11;o__GIF10;f__;g__;s__	China: Tengchong	geothermal spring
387		QZM4_1.bins.254.Tibie	MAG				96.36	0	17218	110	1.24065	1.28751867995019	19/0		*			Omnitrophota	Vampiricoccoidia	Profunditerraquicolales	QZM4-1-127	QZM4-1-254	QZM4-1-254 sp. QZM4-1-254		d__Bacteria;p__Omnitrophota;c__Koll11;o__GIF10;f__;g__;s__	China: Tengchong	geothermal spring
388		QZM4_2.bins.406.Tibie	MAG				85.62	3.64	11682	126	1.11613	1.25613622004205	18/0					Omnitrophota	Vampiricoccoidia	Profunditerraquicolales	QZM4-2-83	QZM4-2-406	QZM4-2-406 sp. QZM4-2-406		d__Bacteria;p__Omnitrophota;c__Koll11;o__GIF10;f__;g__;s__	China: Tengchong	geothermal spring
389		QZM4_2.bins.83.Tibie	MAG				56.61	3.14	5070	138	0.656087	1.12256821798269	14/0					Omnitrophota	Vampiricoccoidia	Profunditerraquicolales	QZM4-2-83	QZM4-2-83	QZM4-2-83 sp. QZM4-2-83		d__Bacteria;p__Omnitrophota;c__Koll11;o__GIF10;f__;g__;s__	China: Tengchong	geothermal spring
390	GCA_001805575.1	RIFCSPHIGHO2_02_FULL_45_21	MAG	29364876, 27774985, 26844018, 28077928	PRJNA288027	SAMN04316139	94.6	1.82	19749	75	1.31244	1.3621032397463	17/0	*			N/A	Omnitrophota	Vampiricoccoidia	Profunditerraquicolales	UBA12090	2-02-FULL-45-21	2-02-FULL-45-21 sp001805575		d__Bacteria;p__Omnitrophota;c__Koll11;o__GIF10;f__UBA12090;g__2-02-FULL-45-21;s__2-02-FULL-45-21 sp001805575	USA: Rifle, Colorado	soil
391	GCA_001805605.1	RIFCSPHIGHO2_02_FULL_46_37	MAG	29364876, 27774985, 26844018, 28077929	PRJNA288027	SAMN04315480	68.76	0	12048	73	0.764338	1.1116026759744	15/1		*	*	N/A	Omnitrophota	Vampiricoccoidia	Profunditerraquicolales	UBA12090	2-02-FULL-45-21	2-02-FULL-45-21 sp001805845		d__Bacteria;p__Omnitrophota;c__Koll11;o__GIF10;f__UBA12090;g__2-02-FULL-45-21;s__2-02-FULL-45-21 sp001805845	USA: Rifle, Colorado	soil
392	GCA_001805775.1	RIFCSPLOWO2_02_FULL_45_28	MAG	29364876, 27774985, 26844018, 28077930	PRJNA288027	SAMN04315929	80.55	0	12440	80	0.909001	1.12849286157666	13/2	*			N/A	Omnitrophota	Vampiricoccoidia	Profunditerraquicolales	UBA12090	2-02-FULL-45-21	2-02-FULL-45-21 sp001805845		d__Bacteria;p__Omnitrophota;c__Koll11;o__GIF10;f__UBA12090;g__2-02-FULL-45-21;s__2-02-FULL-45-21 sp001805845	USA: Rifle, Colorado	groundwater
393	GCA_001805845.1	RIFCSPLOWO2_12_FULL_46_30	MAG	29364876, 27774985, 26844018, 28077931	PRJNA288027	SAMN04315825	76.94	0.36	12765	79	0.865632	1.12102381700026	14/0	*	*	*	N/A	Omnitrophota	Vampiricoccoidia	Profunditerraquicolales	UBA12090	2-02-FULL-45-21	2-02-FULL-45-21 sp001805845		d__Bacteria;p__Omnitrophota;c__Koll11;o__GIF10;f__UBA12090;g__2-02-FULL-45-21;s__2-02-FULL-45-21 sp001805845	USA: Rifle, Colorado	soil
394	GCA_001804385.1	GWA2_44_7	MAG	29364876, 27774985, 26844018, 28077932	PRJNA288027	SAMN04314183	76.6	3.64	12057	146	1.5516	1.95185608355091	15/1		*	*	N/A	Omnitrophota	Vampiricoccoidia	Profunditerraquicolales	UBA12090	GWF2-43-52	GWF2-43-52 sp001805445		d__Bacteria;p__Omnitrophota;c__Koll11;o__GIF10;f__UBA12090;g__GWF2-43-52;s__GWF2-43-52 sp001805445	USA: Rifle, Colorado	soil
395	GCA_001804465.1	GWC2_44_8	MAG	29364876, 27774985, 26844018, 28077933	PRJNA288027	SAMN04313922	86.12	1.82	21606	102	1.71475	1.95488099581979	19/1				N/A	Omnitrophota	Vampiricoccoidia	Profunditerraquicolales	UBA12090	GWF2-43-52	GWF2-43-52 sp001805445		d__Bacteria;p__Omnitrophota;c__Koll11;o__GIF10;f__UBA12090;g__GWF2-43-52;s__GWF2-43-52 sp001805445	USA: Rifle, Colorado	soil
396	GCA_001805445.1	GWF2_43_52	MAG	29364876, 27774985, 26844018, 28077934	PRJNA288027	SAMN04313921	97.27	1.82	144120	40	2.47217	2.49530016407937	19/0	*	*	*	N/A	Omnitrophota	Vampiricoccoidia	Profunditerraquicolales	UBA12090	GWF2-43-52	GWF2-43-52 sp001805445		d__Bacteria;p__Omnitrophota;c__Koll11;o__GIF10;f__UBA12090;g__GWF2-43-52;s__GWF2-43-52 sp001805445	USA: Rifle, Colorado	soil
397	GCA_001806055.1	RIFOXYC2_FULL_43_9	MAG	29364876, 27774985, 26844018, 28077935	PRJNA288027	SAMN04314581	82.23	3.64	14214	160	2.03736	2.38744995257205	17/1		*	*	N/A	Omnitrophota	Vampiricoccoidia	Profunditerraquicolales	UBA12090	GWF2-43-52	GWF2-43-52 sp001805445		d__Bacteria;p__Omnitrophota;c__Koll11;o__GIF10;f__UBA12090;g__GWF2-43-52;s__GWF2-43-52 sp001805445	USA: Rifle, Colorado	soil
398	GCA_003451255.1	UBA9633	MAG	28894102	PRJNA417962	SAMN08017686	97.27	8.3	70775	168	3.27292	3.0855008975018	19/0	*	*	*	18.14x	Omnitrophota	Vampiricoccoidia	Profunditerraquicolales	UBA12090	GWF2-43-52	GWF2-43-52 sp001805445		d__Bacteria;p__Omnitrophota;c__Koll11;o__GIF10;f__UBA12090;g__GWF2-43-52;s__GWF2-43-52 sp001805445	USA: Rifle, Colorado	groundwater
399	GCA_003499645.1	UBA12455	MAG	28894102	PRJNA417962	SAMN08018729	97.27	5.45	130030	47	2.55278	2.48139072941297	19/0	*	*	*	34.05x	Omnitrophota	Vampiricoccoidia	Profunditerraquicolales	UBA12090	GWF2-43-52	GWF2-43-52 sp001805445		d__Bacteria;p__Omnitrophota;c__Koll11;o__GIF10;f__UBA12090;g__GWF2-43-52;s__GWF2-43-52 sp001805445	USA: Rifle, Colorado	groundwater
400	GCA_003516535.1	UBA10034	MAG	28894102	PRJNA417962	SAMN08019552	85.47	3.64	8502	325	2.30283	2.59624077220077	16/3		*		7.21x	Omnitrophota	Vampiricoccoidia	Profunditerraquicolales	UBA12090	GWF2-43-52	GWF2-43-52 sp001805445		d__Bacteria;p__Omnitrophota;c__Koll11;o__GIF10;f__UBA12090;g__GWF2-43-52;s__GWF2-43-52 sp001805445	USA: Rifle, Colorado	groundwater
401	GCA_004299495.1	DP16D_bin.15	MAG	32252814	PRJNA514088	SAMN10720100	82.81	0	7083	299	1.6026	1.93527231010747	16/0					Omnitrophota	Vampiricoccoidia	Profunditerraquicolales	UBA12090	SCPY01	SCPY01 sp004299495		d__Bacteria;p__Omnitrophota;c__Koll11;o__GIF10;f__UBA12090;g__SCPY01;s__SCPY01 sp004299495	USA: Tennessee	groundwater
402	GCA_001805975.1	RIFOXYA2_FULL_45_12	MAG	29364876, 27774985, 26844018, 28077936	PRJNA288027	SAMN04314337	56.61	0	9751	106	0.963262	1.7015756933404	13/0	*	*		N/A	Omnitrophota	Vampiricoccoidia	Profunditerraquicolales	UBA12090	UBA12090	UBA12090 sp003510525		d__Bacteria;p__Omnitrophota;c__Koll11;o__GIF10;f__UBA12090;g__UBA12090;s__UBA12090 sp003510525	USA: Rifle, Colorado	groundwater
403	GCA_001806025.1	RIFOXYB2_FULL_45_11	MAG	29364876, 27774985, 26844018, 28077936	PRJNA288027	SAMN04314442	67.85	0	7893	118	0.948365	1.39773765659543	14/1	*	*		N/A	Omnitrophota	Vampiricoccoidia	Profunditerraquicolales	UBA12090	UBA12090	UBA12090 sp003510525		d__Bacteria;p__Omnitrophota;c__Koll11;o__GIF10;f__UBA12090;g__UBA12090;s__UBA12090 sp003510525	USA: Rifle, Colorado	groundwater
404	GCA_001806075.1	RIFOXYC2_FULL_45_15	MAG	29364876, 27774985, 26844018, 28077936	PRJNA288027	SAMN04314592	66.2	0	9573	124	1.20127	1.81460120845921	14/0	*			N/A	Omnitrophota	Vampiricoccoidia	Profunditerraquicolales	UBA12090	UBA12090	UBA12090 sp003510525		d__Bacteria;p__Omnitrophota;c__Koll11;o__GIF10;f__UBA12090;g__UBA12090;s__UBA12090 sp003510525	USA: Rifle, Colorado	soil
405	GCA_003510525.1	UBA12090	MAG	28894102	PRJNA417962	SAMN08019243	77.36	1.82	7786	220	1.46417	1.85822783273009	17/1				6.72x	Omnitrophota	Vampiricoccoidia	Profunditerraquicolales	UBA12090	UBA12090	UBA12090 sp003510525		d__Bacteria;p__Omnitrophota;c__Koll11;o__GIF10;f__UBA12090;g__UBA12090;s__UBA12090 sp003510525	USA: Rifle, Colorado	groundwater
406	GCA_002340085.1	UBA2593	MAG	28894102	PRJNA348753	SAMN06451495	83.06	3.64	10741	162	1.29942	1.50748526077534	18/1				92.71x	Omnitrophota	Vampiricoccoidia	Profunditerraquicolales	UBA2593	UBA2593	UBA2593 sp002340085		d__Bacteria;p__Omnitrophota;c__Koll11;o__GIF10;f__UBA2593;g__UBA2593;s__UBA2593 sp002340085	South Africa:Welkom	water
407	GCA_013203265.1	bin.343	MAG	No PMC id.	PRJNA616293	SAMN14944590	75.45	0.33	5666	210	1.02112	1.34890432153744	14/0				23.24x	Omnitrophota	Vampiricoccoidia	Vampiricoccoidales	JABMQK01	JABMQK01	JABMQK01 sp013203265		d__Bacteria;p__Omnitrophota;c__Koll11;o__UBA1572;f__JABMQK01;g__JABMQK01;s__JABMQK01 sp013203265	Canada:Ellesmere Island, Lake A	water
408	GCA_001873995.1	CG1_02_44_16	MAG	27112493, 26837824	PRJNA297582	SAMN04328230	97.27	1.82	58930	39	1.55975	1.57434612645214	19/2	*	*	*	N/A	Omnitrophota	Vampiricoccoidia	Vampiricoccoidales	Vampiricoccoidaceae	Phelpsiimicrobium	Phelpsiimicrobium noxiivivens	Yes	d__Bacteria;p__Omnitrophota;c__Koll11;o__UBA1572;f__UBA1572;g__UM-FILTER-44-12;s__UM-FILTER-44-12 sp001873995	USA: near Green River, Utah	water
409	GCA_002322345.1	UBA1572	MAG	28894102	PRJNA348753	SAMN06455835	86.86	3.8	11369	163	1.49324	1.65380381533502	18/2				12.85x	Omnitrophota	Vampiricoccoidia	Vampiricoccoidales	Vampiricoccoidaceae	Phelpsiimicrobium	Phelpsiimicrobium noxiivivens		d__Bacteria;p__Omnitrophota;c__Koll11;o__UBA1572;f__UBA1572;g__UM-FILTER-44-12;s__UM-FILTER-44-12 sp001873995	USA: Crystal Geyser near Green River, Utah	water
410	GCA_002785185.1	CG_4_10_14_0_8_um_filter_44_12	MAG	29379208	PRJNA362739	SAMN06659828	97.27	1.98	49064	77	1.79788	1.81173952441657	19/2	*	*	*	N/A	Omnitrophota	Vampiricoccoidia	Vampiricoccoidales	Vampiricoccoidaceae	Phelpsiimicrobium	Phelpsiimicrobium noxiivivens		d__Bacteria;p__Omnitrophota;c__Koll11;o__UBA1572;f__UBA1572;g__UM-FILTER-44-12;s__UM-FILTER-44-12 sp001873995	USA: Utah	groundwater
411	GCA_002792715.1	CG_4_10_14_0_2_um_filter_44_9	MAG	29379208	PRJNA362739	SAMN06659746	97.27	4.55	19575	141	1.77495	1.74174318186491	20/2	*	*	*	N/A	Omnitrophota	Vampiricoccoidia	Vampiricoccoidales	Vampiricoccoidaceae	Phelpsiimicrobium	Phelpsiimicrobium noxiivivens		d__Bacteria;p__Omnitrophota;c__Koll11;o__UBA1572;f__UBA1572;g__UM-FILTER-44-12;s__UM-FILTER-44-12 sp001873995	USA: Utah	groundwater
412	GCA_001873995.1*	IMG_2786546436; CG1_02_44_16	MAG	27112493, 26837824	PRJNA297582	SAMN04328230	97.27	1.82	58930	39	1.55975	1.57434612645214	19/2	*	*	*	-	Omnitrophota	Vampiricoccoidia	Vampiricoccoidales	Vampiricoccoidaceae	Phelpsiimicrobium	Phelpsiimicrobium noxiivivens		d__Bacteria;p__Omnitrophota;c__Koll11;o__UBA1572;f__UBA1572;g__UM-FILTER-44-12;s__UM-FILTER-44-12 sp001873995	USA: near Green River, Utah	water	Duplicate of GCA_001873995.1
413	GCA_002785185.1*	IMG_2786546453; CG_4_10_14_0_8_um_filter_44_12	MAG	29379208	PRJNA362739	SAMN06659828	97.27	1.98	49064	77	1.79788	1.81173952441657	19/2	*	*	*	-	Omnitrophota	Vampiricoccoidia	Vampiricoccoidales	Vampiricoccoidaceae	Phelpsiimicrobium	Phelpsiimicrobium noxiivivens		d__Bacteria;p__Omnitrophota;c__Koll11;o__UBA1572;f__UBA1572;g__UM-FILTER-44-12;s__UM-FILTER-44-12 sp001873995	USA: Utah	groundwater	Duplicate of GCA_002785185.1
414	GCA_002792715.1*	IMG_2786546454; CG_4_10_14_0_2_um_filter_44_9	MAG	29379208	PRJNA362739	SAMN06659746	97.27	4.55	19575	141	1.77495	1.74174318186491	20/2	*	*	*	-	Omnitrophota	Vampiricoccoidia	Vampiricoccoidales	Vampiricoccoidaceae	Phelpsiimicrobium	Phelpsiimicrobium noxiivivens		d__Bacteria;p__Omnitrophota;c__Koll11;o__UBA1572;f__UBA1572;g__UM-FILTER-44-12;s__UM-FILTER-44-12 sp001873995	USA: Utah	groundwater	Duplicate of GCA_002792715.1
415	GCA_003451585.1	UBA9636	MAG	28894102	PRJNA417962	SAMN08017683	97.27	1.82	96795	30	1.76445	1.78095814927521	20/0	*	*	*	17.17x	Omnitrophota	Vampiricoccoidia	Vampiricoccoidales	Vampiricoccoidaceae	UBA9636	UBA9636 sp003451585		d__Bacteria;p__Omnitrophota;c__Koll11;o__UBA1572;f__UBA1572;g__UBA9636;s__UBA9636 sp003451585	USA: Rifle, Colorado	groundwater
416		SAG_3300016166	SAG	33013724	PRJNA406621	SAMN07631967	38.76	0	14615	67	0.599337	-	9/1	*				Omnitrophota	Vampiricoccoidia	Vampiricoccoidales	Vampiricoccoidaceae	Vampiricoccoidaceae gen.	Vampiricoccoidaceae gen. sp. SAG-3300016166		d__Bacteria;p__Omnitrophota;c__Koll11;o__UBA1572;f__UBA1572;g__UM-FILTER-44-12;s__	USA: South Dakota	wastewater
417	GCA_004102945.1	LiM	MAG	22534291	PRJNA358653	SAMN06176963	97.27	0	1974201	1	1.9742	2.02960933484116	20/0	*	*	*	45.0x	Omnitrophota	Vampiricoccoidia	Vampiricoccoidales	Vampiricoccoidaceae	Vampiricoccoides	Vampiricoccoides archaeovorus	Yes	d__Bacteria;p__Omnitrophota;c__Koll11;o__UBA1572;f__UBA1572;g__Vampiricoccus;s__Vampiricoccus archaeovorus	Germany: Osterholz-Scharmbeck	wastewater	Sealed genome. /// Genus renamed from Vampiricoccus, to differentiate from the historical Vampiricoccus.
418	GCA_002421805.1	UBA6210	MAG	28894102	PRJNA348753	SAMN06450707	97.27	0	411931	6	1.87736	1.93004934717796	20/1				130.62x	Omnitrophota	Vampiricoccoidia	Vampiricoccoidales	Vampiricoccoidaceae	Vampiricoccoides	Vampiricoccus sp002421805		d__Bacteria;p__Omnitrophota;c__Koll11;o__UBA1572;f__UBA1572;g__Vampiricoccus;s__Vampiricoccus sp002421805	Canada: Medicine Hat Glauconitic field	wastewater
419		SAG_3300015403	SAG	33013724	PRJNA406415	SAMN07631841	18.84	0	10446	100	0.8096	-	9/0		*	*		Omnitrophota	Vampiricoccoidia	Vampiricoccoidales	Vampiricoccoidales fam.	Vampiricoccoidales fam. gen.	Vampiricoccoidales fam. gen. sp. SAG-3300015403		d__Bacteria;p__Omnitrophota;c__Koll11;o__UBA1572;f__JABMQK01;g__;s__	USA: Nevada	water
420		IMG_2634166614	SAG	33013724	PRJNA586282	SAMN13170045	29.09	1.82	19168	45	0.495314	-	12/1	*	*	*		Omnitrophota	Vampiricoccoidia	Vampiricoccoidia ord.	Vampiricoccoidia ord. fam.	Vampiricoccoidia ord. fam. gen.	Vampiricoccoidia ord. fam. gen. sp. IMG-2634166614		d__Bacteria;p__Omnitrophota;c__Koll11;o__DTHP01;f__DTHP01;g__;s__	South Africa: Masimong mine	groundwater
421		MAG_1028	MAG		PRJNA364999	SAMN06264663	39.67	0.17	4699	86	0.396898	-	7/0					Omnitrophota	Vampiricoccoidia	Vampiricoccoidia ord.	Vampiricoccoidia ord. fam.	Vampiricoccoidia ord. fam. gen.	Vampiricoccoidia ord. fam. gen. sp. MAG-1028		d__Bacteria;p__Omnitrophota;c__Koll11;o__4484-49;f__4484-49;g__4484-49;s__	Mexico: Guaymas Basin, Gulf of California	saline sediment
422		DG_1_4.bins.69.Tibie	MAG				78.86	9.64	6055	229	1.26783	-	-	-	-	-		Ratteibacteria	UBA8468	B48-G9	B48-G9				d__Bacteria;p__Ratteibacteria;c__UBA8468;o__B48-G9;f__B48-G9;g__;s__	China: Tengchong	geothermal spring
423		DG02_1.bins.32.Tibie	MAG				80.25	0.69	6312	218	1.23544	1.48100986124864	-	-	-	-		Ratteibacteria	UBA8468	B48-G9	B48-G9				d__Bacteria;p__Ratteibacteria;c__UBA8468;o__B48-G9;f__B48-G9;g__;s__	China: Tengchong	geothermal spring
424		DG02_2.bins.52.Tibie	MAG				83.23	0	9723	179	1.38444	1.61074810936591	-	-	-	-		Ratteibacteria	UBA8468	B48-G9	B48-G9				d__Bacteria;p__Ratteibacteria;c__UBA8468;o__B48-G9;f__B48-G9;g__;s__	China: Tengchong	geothermal spring
425		DG_2.bins.143.Tibie	MAG				87.93	0	14989	115	1.26248	1.38871631283687	-	-	-	-		Ratteibacteria	UBA8468	B48-G9	B48-G9				d__Bacteria;p__Ratteibacteria;c__UBA8468;o__B48-G9;f__B48-G9;g__;s__	China: Tengchong	geothermal spring
426		QZM4_1.bins.313.Tibie	MAG				88.48	0	18524	153	1.83424	2.00485408241338	-	-	-	-		Ratteibacteria	UBA8468	B48-G9	B48-G9				d__Bacteria;p__Ratteibacteria;c__UBA8468;o__B48-G9;f__B48-G9;g__;s__	China: Tengchong	geothermal spring
427		QZM4.bins.109.Tibie	MAG				94.36	0	20929	152	1.9728	2.01944825468318	-	-	-	-		Ratteibacteria	UBA8468	B48-G9	B48-G9				d__Bacteria;p__Ratteibacteria;c__UBA8468;o__B48-G9;f__B48-G9;g__;s__	China: Tengchong	geothermal spring
428		QZM4_1.bins.196.Tibie	MAG				86.05	0	9440	178	1.40461	1.61245092411893	-	-	-	-		Ratteibacteria	UBA8468	B48-G9	B48-G9				d__Bacteria;p__Ratteibacteria;c__UBA8468;o__B48-G9;f__B48-G9;g__;s__	China: Tengchong	geothermal spring
429		QZM4_2.bins.498.Tibie	MAG				81.58	0.16	11576	264	2.38129	2.82299110402565	-	-	-	-		Ratteibacteria	UBA8468	B48-G9	B48-G9				d__Bacteria;p__Ratteibacteria;c__UBA8468;o__B48-G9;f__B48-G9;g__;s__	China: Tengchong	geothermal spring
430		JZ_1.bins.54.201901	MAG				92.53	0.86	14715	255	2.22193	2.29919325845865	-	-	-	-		Ratteibacteria	UBA8468	B48-G9	B48-G9				d__Bacteria;p__Ratteibacteria;c__UBA8468;o__B48-G9;f__B48-G9;g__;s__	China: Jinze Spring, Tengchong	geothermal spring
431		SRBZ_1.bins.85.201808	MAG				94.83	0	261633	13	1.72833	1.7603676919943	-	-	-	-		Ratteibacteria	UBA8468	B48-G9	B48-G9				d__Bacteria;p__Ratteibacteria;c__UBA8468;o__B48-G9;f__B48-G9;g__;s__	China: Shuirebaozha Spring, Tengchong	geothermal spring
432	GCA_003562455.1	CSSed11_257m	MAG	30231921	PRJNA434545	SAMN08574747	67.24	2.23	4841	245	1.1595	1.59674481737414	-	-	-	-	8.76x	Ratteibacteria	UBA8468	B48-G9	B48-G9				d__Bacteria;p__Ratteibacteria;c__UBA8468;o__B48-G9;f__B48-G9;g__;s__	Russia: Kulunda Steppe	saline sediment
433	GCA_003644395.1	B48_G9	MAG	31015394	PRJNA362212	SAMN09215261	81.03	2.59	10919	117	1.15335	1.34130492085127	-	-	-	-	26.88x	Ratteibacteria	UBA8468	B48-G9	B48-G9	B48-G9	B48-G9 sp003644395		d__Bacteria;p__Ratteibacteria;c__UBA8468;o__B48-G9;f__B48-G9;g__B48-G9;s__B48-G9 sp003644395	Mexico: Guaymas Basin, Gulf of California	saline sediment
434		DG_1_4.bins.104.Tibie	MAG				58.46	0	5207	220	1.08117	1.75372424979724	-	-	-	-		Ratteibacteria	UBA8468	B48-G9	B48-G9	JAAYXZ01			d__Bacteria;p__Ratteibacteria;c__UBA8468;o__B48-G9;f__B48-G9;g__JAAYXZ01;s__	China: Tengchong	geothermal spring
435		QZM4_2.bins.330.Tibie	MAG				89.66	0	17528	134	1.51852	1.6060497091486	-	-	-	-		Ratteibacteria	UBA8468	B48-G9	B48-G9	JAAYXZ01			d__Bacteria;p__Ratteibacteria;c__UBA8468;o__B48-G9;f__B48-G9;g__JAAYXZ01;s__	China: Tengchong	geothermal spring
436		QZM4_3.bins.133.Tibie	MAG				58.51	0	5047	207	0.973852	1.62633934535738	-	-	-	-		Ratteibacteria	UBA8468	B48-G9	B48-G9	JAAYXZ01			d__Bacteria;p__Ratteibacteria;c__UBA8468;o__B48-G9;f__B48-G9;g__JAAYXZ01;s__	China: Tengchong	geothermal spring
437		DG_1_6.bins.143.Tibie	MAG				40.6	0	3899	182	0.745991	-	-	-	-	-		Ratteibacteria	UBA8468	B48-G9	B48-G9	JAAYXZ01	JAAYXZ01 sp. DG-1-6-143		d__Bacteria;p__Ratteibacteria;c__UBA8468;o__B48-G9;f__B48-G9;g__JAAYXZ01;s__	China: Tengchong	geothermal spring
438		ZZD_9_2.bins.4.Tibie	MAG				33.7	0	3444	105	0.378396	-	-	-	-	-		Ratteibacteria	UBA8468	B48-G9	B48-G9	JAAYXZ01	JAAYXZ01 sp. ZZD-9-2-4		d__Bacteria;p__Ratteibacteria;c__UBA8468;o__B48-G9;f__B48-G9;g__JAAYXZ01;s__	China: Tengchong	geothermal spring
439		DG_1_4.bins.131.Tibie	MAG				50	0	4799	286	1.30444	2.47381187179973	-	-	-	-		Ratteibacteria	UBA8468	B48-G9	DTJG01				d__Bacteria;p__Ratteibacteria;c__UBA8468;o__B48-G9;f__DTJG01;g__;s__	China: Tengchong	geothermal spring
440		DG_2.bins.114.Tibie	MAG				69.15	0.34	6150	271	1.47247	2.06352618171589	-	-	-	-		Ratteibacteria	UBA8468	B48-G9	DTJG01				d__Bacteria;p__Ratteibacteria;c__UBA8468;o__B48-G9;f__DTJG01;g__;s__	China: Tengchong	geothermal spring
441		DRTY-6.bins.107.201705	MAG				88.79	0	21075	129	2.07407	2.21494233233661	-	-	-	-		Ratteibacteria	UBA8468	B48-G9	DTJG01				d__Bacteria;p__Ratteibacteria;c__UBA8468;o__B48-G9;f__DTJG01;g__;s__	China: Diretiyanqu Spring, Tengchong	geothermal spring
442		SRBZ_2.bins.227.201901	MAG				90.52	0.16	14885	198	2.04636	2.14026211597695	-	-	-	-		Ratteibacteria	UBA8468	B48-G9	DTJG01				d__Bacteria;p__Ratteibacteria;c__UBA8468;o__B48-G9;f__DTJG01;g__;s__	China: Shuirebaozha Spring, Tengchong	geothermal spring
443		DG_1_5.bins.38.Tibie	MAG				84.67	0.34	6649	291	1.70638	1.94379903692695	-	-	-	-		Ratteibacteria	UBA8468	B48-G9	DTJG01	DTJG01			d__Bacteria;p__Ratteibacteria;c__UBA8468;o__B48-G9;f__DTJG01;g__DTJG01;s__	China: Tengchong	geothermal spring
444		DG_1_6.bins.57.Tibie	MAG				92.95	0	42830	78	2.02385	2.0647276066109	-	-	-	-		Ratteibacteria	UBA8468	B48-G9	DTJG01	DTJG01			d__Bacteria;p__Ratteibacteria;c__UBA8468;o__B48-G9;f__DTJG01;g__DTJG01;s__	China: Tengchong	geothermal spring
445		DRTY_6.bins.152.201705	MAG				70.69	0	201918	12	1.38243	1.85436887994634	-	-	-	-		Ratteibacteria	UBA8468	B48-G9	DTJG01	DTJG01			d__Bacteria;p__Ratteibacteria;c__UBA8468;o__B48-G9;f__DTJG01;g__DTJG01;s__	China: Tengchong	geothermal spring
446		QZM4_1.bins.393.Tibie	MAG				51.83	0	4233	280	1.15608	2.11504207830223	-	-	-	-		Ratteibacteria	UBA8468	B48-G9	DTJG01	DTJG01			d__Bacteria;p__Ratteibacteria;c__UBA8468;o__B48-G9;f__DTJG01;g__DTJG01;s__	China: Tengchong	geothermal spring
447	GCA_001871865.1	CG1_02_41_171	MAG	27112493, 26837824	PRJNA297582	SAMN04328232	67.24	0	7991	130	0.924845	1.30425186856579	-	-	-	-	N/A	Ratteibacteria	UBA8468	UBA8468	UBA8468	UBA8468	UBA8468 sp002791075		d__Bacteria;p__Ratteibacteria;c__UBA8468;o__UBA8468;f__UBA8468;g__UBA8468;s__UBA8468 sp002791075	USA: near Green River, Utah	water
448	GCA_002781165.1	CG01_land_8_20_14_3_00_40_19	MAG	29379208	PRJNA362739	SAMN06659160	79.31	0	4882	393	1.48171	1.7715387374462	-	-	-	-	N/A	Ratteibacteria	UBA8468	UBA8468	UBA8468	UBA8468	UBA8468 sp002791075		d__Bacteria;p__Ratteibacteria;c__UBA8468;o__UBA8468;f__UBA8468;g__UBA8468;s__UBA8468 sp002791075	USA: Crystal Geyser near Green River, Utah	groundwater
449	GCA_002781765.1	CG15_BIG_FIL_POST_REV_8_21_14_020_41_12	MAG	29379208	PRJNA362739	SAMN06659577	82.76	0	4745	378	1.4147	1.62105534547955	-	-	-	-	N/A	Ratteibacteria	UBA8468	UBA8468	UBA8468	UBA8468	UBA8468 sp002791075		d__Bacteria;p__Ratteibacteria;c__UBA8468;o__UBA8468;f__UBA8468;g__UBA8468;s__UBA8468 sp002791075	USA: Crystal Geyser near Green River, Utah	groundwater
450	GCA_002782985.1	CG_4_10_14_3_um_filter_41_18	MAG	29379208	PRJNA362739	SAMN06659887	87.93	2.59	5550	320	1.34995	1.41604266688235	-	-	-	-	N/A	Ratteibacteria	UBA8468	UBA8468	UBA8468	UBA8468	UBA8468 sp002791075		d__Bacteria;p__Ratteibacteria;c__UBA8468;o__UBA8468;f__UBA8468;g__UBA8468;s__UBA8468 sp002791075	USA: Crystal Geyser near Green River, Utah	groundwater
451	GCA_002783545.1	CG_4_8_14_3_um_filter_41_36	MAG	29379208	PRJNA362739	SAMN06659954	58.62	0	6154	181	0.844218	1.36560659980589	-	-	-	-	N/A	Ratteibacteria	UBA8468	UBA8468	UBA8468	UBA8468	UBA8468 sp002791075		d__Bacteria;p__Ratteibacteria;c__UBA8468;o__UBA8468;f__UBA8468;g__UBA8468;s__UBA8468 sp002791075	USA: Crystal Geyser near Green River, Utah	groundwater
452	GCA_002791075.1	CG_4_9_14_3_um_filter_41_21	MAG	29379208	PRJNA362739	SAMN06660111	86.21	0.86	6707	292	1.45736	1.58849521141789	-	-	-	-	N/A	Ratteibacteria	UBA8468	UBA8468	UBA8468	UBA8468	UBA8468 sp002791075		d__Bacteria;p__Ratteibacteria;c__UBA8468;o__UBA8468;f__UBA8468;g__UBA8468;s__UBA8468 sp002791075	USA: Crystal Geyser near Green River, Utah	groundwater
453	GCA_001871865.1*	IMG_2786546438; CG1_02_41_171	MAG	27112493, 26837824	PRJNA297582	SAMN04328232	67.24	0	7991	130	0.924845	1.30425186856579	-	-	-	-	-	Ratteibacteria	UBA8468	UBA8468	UBA8468	UBA8468	UBA8468 sp002791075		d__Bacteria;p__Ratteibacteria;c__UBA8468;o__UBA8468;f__UBA8468;g__UBA8468;s__UBA8468 sp002791075	USA: near Green River, Utah	water	Duplicate of GCA_001871865.1
454	GCA_002771935.1	CG23_combo_of_CG06-09_8_20_14_all_48_7	MAG	29379208	PRJNA362739	SAMN06659696	41.71	0	3543	296	0.928949	-	-	-	-	-	N/A	Ratteibacteria	UBA8468	UBA8468 ord.	UBA8468 ord. fam.	UBA8468 ord. fam. gen.	UBA8468 ord. fam. gen. sp. GCA-002771935-1		d__Bacteria;p__Ratteibacteria;c__UBA8468;o__MWAK01;f__MWAK01;g__;s__	USA: Crystal Geyser near Green River, Utah	groundwater

## Sheet: Table S2 - Taxon Etymology
Phylum	Etymology	Description	Class	Etymology	Description	Order	Etymology	Description	Family	Etymology	Description	*Genus	Etymology	Description	Species	Etymology	Description
Omnitrophota corrig. (effectively published synonym: Candidatus Omnitrophica Rinke et al., 2013)	Om.ni.tro.pho'ta N.L. masc. n. Omnitrophus, type genus of the phylum; -ota, ending to denote a phylum; N.L. pl. neut. n. Omnitrophota, the Omnitrophus phylum	The properties of the phylum are as given by Rinke et al. (2013) with the following modifications. Members of this phylum typically have small cells, with cells of approximately 0.2 μm identified in several classes. However, metagenomic DNA containing members of the Omnitrophota is also fresquently recovered from larger cell fractions after serial filtration and larger cells have been observed in…	Omnitrophia	Om.ni.tro'phi.a N.L. masc. n. Omnitrophus, type genus of the class; -ia, ending to denote a class; N.L. neut. pl. n. Omnitrophia, the Omnitrophus class	This class belongs to the phylum Omnitrophota. The description for this class is currently the same as for the order Omnitrophales. The nomenclatural type of the class is the genus Omnitrophus.	Omnitrophales	Om.ni.tro.pha'les N.L. masc. n. Omnitrophus, type genus of the order; -ales, ending to denote an order; N.L. fem. pl. n. Omnitrophales, the Omnitrophus order	This order belongs to the class Omnitrophia, in the phylum Omnitrophota. Cell sizes vary within the order, with most observed cells and DNA recovered from serial-filtration experiments associated with small cell size. Several members encode very large ORFs putatively involved in adhesion, and ATP/ADP translocase. Genomic predictions indicate respiratory pathways as predominantly conserved in the …	Omnitrophaceae	Om.ni.tro.pha'ce.ae N.L. masc. n.Omnitrophus, type genus of the family; -aceae, ending to denote a family; N.L. fem. pl. n. Omnitrophaceae, family of the genus Omnitrophus	This family belongs to the order Omnitrophales, in the class Omnitrophia, phylum Omnitrophota. The description of this monotypic family is currently the same as the genus Omnitrophus. The nomenclatural type of the family is the genus Omnitrophus.	Omnitrophus Rinke et al., 2013	Om.ni.tro'phus L. adj. omnis, all; Gr. n. trophos, feeder; N.L. masc. n. Omnitrophus, eating all	This monotypic genus belongs to the family Omnitrophaceae, order Omnitrophales, class Omnitrophia, in the phylum Omnitrophota. Although only a single medium-quality genome is available for this genus currently, the historical name for the lineage represented by this phylum is based on the name of this genus. The description for this genus is the same as for the species Omnitrophus fodinae, the ty…	Omnitrophus fodinae Rinke et al., 2013	fo.di'nae. L. gen. n. fodinae, of a mine, coal mine	This species is the type of the genus Omnitrophus. No data on cell size in the species is available. This species is represented by only one medium-quality genome, however, for historical significance, this genome serves as the nomenclatural type for the species. The %GC content of the genome is 49.56%. The estimated genome size is 2.9 Mb, with the available genome estimated at 70% completeness. …
									Abzuiibacteriaceae	Ab.zu.i.i.bac.te.ri.a'ce.ae N.L. neut. n. Abzuiibacterium, type genus for the family; -aceae, ending to denote a family; N.L. fem. pl. n. Abzuiibacteriaceae, family of the genus Abzuiibacterium	This family belongs to the order Omnitrophales, in the class Omnitrophia, phylum Omnitrophota. The description of this monotypic family is currently the same as the genus Abzuiibacterium. The nomenclatural type of the family is the genus Abzuiibacterium.	Abzuiibacterium	Ab.zu.i.i.bac.te'ri.um N.L. n. Abzu, the Mesopotamian god of fresh water; L. neut. n. bacterium, a baterium; N.L. neut. n. Abzuiibacterium, a bacterium named after the Mesopotamian god of fresh water, Abzu	This monotypic genus belongs to the family Abzuiibacteriaceae, order Omnitrophales, class Omnitrophia, phylum Omnitrophota. The description of this monotypic genus is currently the same as that of the species Abzuiibacterium crystallinum, the type species for the genus.	Abzuiibacterium crystallinum	crys.tal.li'num L. neut. adj. crystallinum, crystalline, referring to Crystal Geyser where organism was detected	This species is the nomenclatural type for the genus Abzuiibacterium. No information on cell size is available for the species. Two unique assemblies are available for the species and range in genome size between 2.4 and 2.6 Mb, with a %GC content of 45.25-45.27 %. This species encodes ATP/ADP translocase, and a very large ORF. Respiratory pathways are present in this species. The genomes were or…
									Aquincolibacteriaceae	A.quin.co.li.bac.te.ri.a'ce.ae N.L. neut. n. Aquincolibacterium, type genus of the family; -aceae, ending to denote a family; N.L. fem. pl. n. Aquincolibacteriaceae, family of the genus Aquincolibacterium	This family belongs to the order Omnitrophales, in the class Omnitrophia, phylum Omnitrophota. No cell size data is available for members of the family. The presence of ATP/ADP translocase is variable within the family, but very large ORFs are frequently encoded by members of the family. High rates of carbon assimilation was observed for members of the family on root exudates and leaf litter. The…	Aquincolibacterium	A.quin.co.li.bac.te'ri.um L. fem. n. aqua, water; L. masc./fem. incola, inhabitant; L. neut. n. bacterium, a baterium; N.L. neut. n. Aquincolibacterium, bacterial inhabitant of water	This genus belongs to the family Aquincolibacteriaceae, order Omnitrophales, class Omnitrophia, phylum Omnitrophota. Cell size data is unavailable for members of the genus. Very large ORFs and respiratory pathways are encoded by the genomes belonging to this genus. Assemblies assigned to this genus originate from lakes, groundwater and soil. The nomenclatural type for the genus is Aquincolibacter…	Aquincolibacterium lacustre	la.cus’tre N.L. neut. adj. lacustre, belonging to the lake	This species is the nomenclatural type for the genus Aquincolibacterium. Estimated genome sizes for the species are 2.27-2.36 Mb, with %GC content of 50.32-50.59%. Very large ORFs are encoded by members of this species. Few genes relating to respiratory pathways for energy metabolism is encoded by genomes. The nomenclatural type for the species is the genome GCA_903856085.1.
															Aquincolibacterium methanicum	me.tha.ni'cum N.L. neut. n. methanum, methane; N.L. neut. adj. methanicum, pertaining to methane	Estimated genome size of this species is 2.7 to 3 Mb. %GC content range between 52.58 to 53.08%. Very large ORFs or partial homologs to very large ORFs are encoded by this species. Limited information on energy metabolism can be predicted from the genome. All assemblies originated from water from the methane-rich boreal lake Lake Alinen-Mustajärvi, Finland. The nomenclatural type for the species …
												Multiplicimicrobium	Mul.ti.pli.ci.mi.cro'bi.um L. fem. adj. multiplex, manifold; L. neut. n. microbium, a microbe; N.L. neut. n. Multiplicimicrobium, a microbe from many different environments	This genus belongs to the family Aquincolibacteriaceae, order Omnitrophales, class Omnitrophia, phylum Omnitrophota. Assemblies assigned to this genus were recovered from samples of groundwater and engineered environments. The nomenclatural type for the genus is the species Multiplicimicrobium inquinatum.	Multiplicimicrobium inquinatum	in.qui.na'tum L. neut. adj. inquinatum, polluted or defiled, referring to the recovery of this organism from wastewater	This species is the type species for the genus Multiplicimicrobium. Estimated genome size for this species is between 2 and 2.25 Mb with a %GC content of 46.35-46.78%. Very large ORFs or partial homologs to very large ORFs, ATP/ADP translocase, genes associated with respiration were encoded by the genomes of this species. Assemblies for this species originated from activated sludge bioreactor sam…
												Pegaeibacterium	Pe.gae.i.bac.te'ri.um N. L. fem. n. Pegaeae, Greek freshwater nymphs of springs; L. neut. n. bacterium, a baterium; N.L. neut. n. Pegaeibacterium, a bacterium of freshwater	This genus belongs to the family Aquincolibacteriaceae, in the order Omnitrophales, class Omnitrophia, phylum Omnitrophota. Assemblies belonging to this genus originated from lake water and sediment. No cell size information is available for members of this genus. Some genes associated with respiration are encoded by members of the genus. Very large ORFs are predicted to be encoded by members of …	Pegaeibacterium caenilacustre	cae.ni.la.cus'tre L. neut. n. caenum, mud; N.L. fem. adj. lacustre, of or from a lake; N. L. fem. adj. caenilacustre, inhabiting mud from a lake	This species is the nomenclatural type for the genus Pegaeibacterium. Estimated genome sizes for the species range between 2.1 and 2.2 Mb with GC% of 54.27-54.30%. Very large ORFs are encoded by the genomes of this species. Both assemblies for the species originate form freshwater sediment from Lake Alinen Mustajärvi, Finland. The nomenclatural type for the species is the genome GCA_903841325.1.
									Danuiimicrobiaceae	Da.nu.i.i.mi.cro.bi.a'ce.ae N.L. neut. n. Danuiimicrobium, type genus of the family; -aceae, ending to denote a family; N.L. fem. pl. n. Danuiimicrobiaceae, family of the genus Danuiimicrobium	This family belongs to the order Omnitrophales, class Omnitrophia, phylum Omnitrophota. As a monotypic family, the description of the family is currently the same as for the genus Danuiimicrobium, the nomenclatural type for the family.	Danuiimicrobium	Da.nu.i.i.bac.te'ri.um N.L. n. Danu, Hindu goddess of primordial waters; L. neut. n. bacterium, a baterium; N.L. neut. n. Danuiibacterium, a bacterium named after the Hindu goddess of primordial water, Danu	This genus belongs to the family Danuiimicrobiaceae, in the order Omnitrophales, class Omnitrophia, phylum Omnitrophota. As a monotypic genus, the description is currently the same as for the type species of the genus, Danuiimicrobium aquiferis.	Danuiimicrobium aquiferis	a.qui.fe’ris N.L. gen. n. aquiferis, of an aquifer	This species is the nomenclatural type of the genus Danuiimicrobium. Genome assemblies for this species were recovered from soil and groundwater from Rifle, Colorado, USA. The type for the species is the genome GCA_001804285.1.
									Taenariiviventaceae	Tae.na.ri.i.vi.ven.ta'ce.ae N.L. fem. n. Taenariivivens, type genus of the family; -aceae, ending to denote a family; N.L. fem. pl. n. Taenariiviventaceae, family of the genus Taenariivivens	The family belongs to the order Omnitrophales, class Omnitrophia, phylum Omnitrophota. Where available, cells are predicted to be < 0.3 µm. Genomes encode ATP/ADP translocases, very large ORFs, and are consistent with predicted repiratory pathways. Assemblies assigned to the family have been recovered from ground water, wastewater, geothermal springs, soil, and saline sediments. Where data is ava…	Taenariivivens	Tae.na.ri.i.vi'vens L. masc. adj. taenarius, belowground; L. pres. part. vivens, living; N. L. fem. n. Taenariivivens, living belowground	This genus belongs to the family Taenariiviventaceae, order Omnitrophales, phylum Omnitrophota. As a monotypic genus, the description is currently the same as for the nomenclatural type for the genus, Taenariivivens baikalensis.	Taenariivivens baikalensis	bai.ka.len'sis N.L. fem. adj. baikalensis, of Baikal, referring to Lake Baikal, where this organism was identified from	This species is the type for the genus Taenariivivens. Estimated genome size for the species is 2.6 Mb. The genome encodes genes for the tight adherence complex, and a very large ORF. The %GC content for this genome is 46.97%. The genome representing this species was recovered from a water sample from Lake Baikal, Russia. The nomenclatural type for the species is the genome GCA_009691445.1.
			Aquiviventia	A.qui.vi.ven.t'i.a N.L. masc. n. Aquivivens, type genus of the class; -ia, ending to denote a class; N.L. neut. pl. n. Aquiviventia, the class whose nomenclatural type is the genus Aquivivens	This class belongs to the phylum Omnitrophota. The description for the class is currently the same as for the order Aquiviventales. The nomenclatural type for the class is the genus Aquivivens.	Aquiviventales	A.qui.vi.ven.ta'les N.L. masc. n. Aquivivens, type genus of the order; -ales, ending to denote an order; N.L. fem. pl. n. Aquiviventales, the order whose nomenclatural type is the genus Aquivivens	This order belongs to the class Aquiviventia in the phylum Omnitrophota. The description for the order is currently the same as for the type for the order, the genus Aquivivens.	Aquiviventaceae	A.qui.vi.ven.ta'ce.ae N.L. masc. n. Aquivivens, type genus of the family; -aceae, ending to denote a family; N.L. fem. pl. n. Aquiviventaceae, family of the genus Aquivivens	This family belongs to the order Aquiviventales, class Aquiviventia, phylum Omnitrophota. Observed cell sizes of organisms in this family were predominantly small (0.2 µm), but some variation in cell size has been observed. Members differ in the presence of genes encoding tight-adherence complexes, ATP/ADP translocases, and very large ORFs. Most members of this family encode diverse respiratory p…	Aquivivens	A.qui.vi'vens L. fem. n. aqua, water; L. pres. part. vivens, living; N.L. masc. n. Aquivivens, living in water	This genus belongs to the family Aquiviventaceae, order Aquiviventales, class Aquiviventia, Omnitrophia. As the genus is currently monotypic, the description is the same as for the nomenclatural type, the species Aquivivens invisus.	Aquivivens invisus	in.vi'sus L. masc. adj. invisus, unseen, referring to them being hidden or unseen as the occur in the subsurface	This species is the nomenclatural type for the genus Aquivivens. Cell data is currently unavailable for this species. Genomes belonging to this species are predicted to range between 1.7 Mb and 2 Mb, and encode at least two very large ORFs. GC content for the species range between 62.83-63.50%. ATP/ADP translocase, components of the tight-adherence complex, and respiratory pathways are encoded by…
			Makaraimicrobia	Ma.ka.ra.i.mi.cro'bi.a N.L. neut. n. Makaraimicrobium, type genus of the class; -ia, ending to denote a class; N.L. neut. pl. n. Makaraimicrobia, the class whose nomenclatural type is the genus Makaraimicrobium	This class belongs to the phylum Omnitrophota. Observed cell size vary greatly within the class, and cells of 0.2 µm to 2.5 µm have been observed. Sequence data of organisms belonging to the class is also frequently observed from larger cell fractions during serial-filtration experiments. Most members of the class lack several genes associated with parasitism and predation, like those encoding ti…	Makaraimicrobiales	Ma.ka.ra.i.mi.cro.bi.a'les N.L. neut. n. Makaraimicrobium, type genus of the order; -ales, ending to denote an order; N.L. fem. pl. n. Makaraimicrobiales, the order whose nomenclatural type is the genus Makaraimicrobium	This order belongs to the class Makaraimicrobia, in the phylum Omnitrophota. Where available, cells of organisms belonging to the order are small (<0.3 µm). Very large ORFs is present in some members of the order, but is not pervasive within the order. Environmental samples from which assemblies are derived range in pH from acidic to circumneutral. The nomenclatural type of the order is the genus…	Makaraimicrobiaceae	Ma.ka.ra.i.mi.cro.bi.a'ce.ae N.L. neut. n. Makaraimicrobium, type genus of the family; L. fem. pl. suff. -aceae, ending to denote a family; N.L. fem. pl. n. Makaraimicrobiaceae, family of the genus Makaraimicrobium	This family belongs to the order Makaraimicrobiales, class Makaraimicrobia, phylum Omnitrophota.The only observed cell size within the family is that of Thioglobulicalix magnus, at 2.5 µm. Very large ORFs are intermittently encoded by genomes in this family. Parasitism and predation-related genes are largely absent from this family, and some genes linked to acetogenic metabolism is present in gen…	Makaraimicrobium	Ma.ka.ra.i.mi.cro'bi.um N.L. n. Makara, mystical creature of the waters in Hindu mythology; L. neut. n. microbium, a microbe; N.L. neut. n. Makaramicrobium, a microbe named for Makara	This genus belongs to the family Makaraimicrobiaceae, order Makaraimicrobiales, class Makaraimicrobia, phylum Omnitrophota. No cell size data is available for members of this genus, and predicted genome size varies between genomes assigned to the genus. No predation- or parasitism-related genes are present in genomes of this genus and limited data for energy metabolism is available for this genus…	Makaraimicrobium thalassicum	tha.las’si.cum Gr. fem. n. thalassa, the sea; Gr. neut. adj. suff. -icum, suffix used with the sense of pertaining to; N.L. neut. adj. thalassicum, of the sea	This species is the type for the genus Makaraimicrobium. Estimated genome size for this species is 2 Mb. %GC content for this genome is 48.46%. No large ORF or other parasitism- or predation-related genes are encoded by this species. Limited information for energy metabolism pathways is available. The assembly for this species was recovered from a metagenomic sediment sample from a deep-sea hydro…
												Thioglobulicalix	Thi.o.glo'bu.li.ca'lix Gr. n. thios, sulfur; L. masc. dim. n. globulus, little ball, globule; L. masc. n. calix, cup or chalice; N. L. masc. n. Thioglobulicalix, cup of small sulfur globules, referring to the sulfur inclusions within the cells	This monotypic genus belongs to the family Makaraimicrobiaceae, order Makaraimicrobiales, class Makaraimicrobia, phylum Omnitrophota. The description of for this genus is currently the same as for the type species of the genus Thioglobulicalix magnus.	Thioglobulicalix magnus	mag'nus L. masc. adj. magnus, large or great, referring to the large cell size observed for this organism in comparison to other Omnitrophica; Basonym: Candidatus Omnitrophus magenticus Kolinko et al., 2016	This species is the type for the genus Thioglobulicalix. Large cells (2.5 µm) containing sulfur globules are characteristic of this species. Estimated genome size is 3 Mb. Genome %GC is 35.75%. Some genes associated with acetogenesis is predicted from the gneome. The assembly originates from sediment of Lake Chemisee, Bavaria, Germany and the nomenclatural type is the genome GCA_000954095.1.
						Aquitaenariimonadales	A.qui.tae.na.ri.i.mo.na.da'les N.L. fem. n. Aquitaenariimonas, type genus of the order; -ales, ending to denote a order; N.L. fem. pl. n. Aquitaenariimonadales, order of the genus Aquitaenariimonas	This order belongs to the class Makaraimicrobia, in the phylum Omnitrophota. The decription of this order is currently the same as for the nomenclatural type of the order, the genus Aquitaenariimonas.	Aquitaenariimonadaceae	A.qui.tae.na.ri.i.mo.na.da'ce.ae N.L. fem. n. Aquitaenarimonas, type genus of the family; -aceae, ending to denote a family; N.L. fem. pl. n. Aquitaenarimonadaceae, family of the genus Aquitaenarimonas	This family belongs to the order Aquitaenariimonadales, in the class Makaraimicrobia, phylum Omnitrophota. The description for this family is currently the same as for the genus Aquitaenariimonas, as no other representatives for this family is available. The type for the family is the genus Aquitaenariimonas.	Aquitaenariimonas	A.qui.tae.na.ri.i.mo'nas L. fem. n. aqua, water; L. masc. adj. taenarius, of or belonging to underground; L. fem. n. monas, a monad; N. L. fem. n. Aquitaenariimonas, a monad from water from underground	This genus belongs to the family Aquitaenariimonadaceae, order Aquitaenariimonadales, class Makaraimicrobia, phylum Omnitrophota. The description for this monotypic genus is currently the same as for the species Aquitaenariimonas noxiae. The type species for the genus is Aquitaenariimonas noxiae.	Aquitaenariimonas noxiae	nox.i'ae N.L. fem. adj. noxiae, named for the Greek primordial goddess and personification of the night, Nox	This species is the type for the genus Aquitaenariimonas. No cell size data is available for this species. This estimated genome size for members of this species is approximately 2 Mb. Two unique assemblies are available for this species, and range in % GC content from 42.05-42.75%. The highest quality genome available for the species encodes a very large ORF, and genes associated with acetogenes…
						Pluralincolimonadales	Plu.ral.in.co.li.mo.na.da'les N.L. fem. n. Pluralincolimonas, type genus of the order; -ales, ending to denote an order; N.L. fem. pl. n. Pluralincolimonadales, the order whose nomenclatural type is the genus Pluralincolimonas	This order belongs to the class Makaraimicrobia, in the phylum Omnitrophota. As a monotypic order, the description for the order is currently the same as for the genus Pluralincolimonas, the nomenclatural type for the order.	Pluralincolimonadaceae	Plu.ral.in.co.li.mo.na.da.'ce.ae N.L. fem. n. Pluralincolimonas, type genus of the family; -aceae, ending to denote a family; N.L. fem. pl. n. Pluralincolimonadaceae, family of the genus Pluralincolimonas	This family belongs to the order Pluralincolimonadales, class Makaraimicrobia, phylum Omnitrophota. This family is currently a monotypic family, and has the same description as the nomenclatural type of the fmaily, the genus Pluralincolimonas.	Pluralincolimonas	Plu.ral.in.co.li.mo'nas L. adj. pluralis, belonging or relating to more than one, relating to many; L. masc./fem. incola, inhabitant; L. fem. n. monas, a monad; N. L. fem. n. Pluralincolimonas, a monad that inhabits many places	This genus belong the to family Pluralincolimonadaceae, order Pluralicolimonadales, class Makaraimicrobia, phylum Omnitrophota. Some genes associated with respiration is encoded by genomes assigned to this genus, with no genes for acetogenesis. Assemblies assigned to this genus originate from ground water, freshwater ponds, soil, and permafrost. The type for the genus is the species Pluralincolim…	Pluralincolimonas frigidipaludosa	fri.gi.di.pa.lu.do'sa L. masc. adj. frigidus, cold; L. fem. adj. paludosa, boggy or marshy; N. L. fem. adj. frigidipaludosa, of a cold marsh or bog	This species is the type for the genus Pluralincolimonas. Estimated genome size for the species is 1.6 Mb, with a %GC of 51.75%. This species encode an ATP/ADP translocase, and some genes associated with respiration. Genome data for this species originate from a permafrost sample from Stordalen Mire, Sweden. The nomenclatural type for the species is the genome GCA_003141835.1.
						Taenaricolales	Tae.na.ri.co.la'les N.L. fem. n. Taenaricola, type genus of the order; -ales, ending to denote an order; N.L. fem. pl. n. Taenaricolales, the order whose nomenclatural type is the genus Taenaricola	This order belongs to the class Makaramicrobia, in the phylum Omnitrophota. This is a monotypic order, and currently has the same description as the nomenclatural type for the order, the genus Taenaricola.	Taenaricolaceae	Tae.na.ri.cola'ce.ae N.L. fem. n. Taenaricola, type genus of the family; -aceae, ending to denote a family; N.L. fem. pl. n. Taenaricolaceae, family of the genus Taenaricola	This family belongs to the order Taenaricolales, class Makaraimicrobia, phylum Omnitrophota. As a monotypic family, the description of the family is currently the same as for the genus Taenaricola, the nomenclatural type for the family.	Taenaricola	Tae.na.ri.'co.la L. masc. adj. taenarius, of or belonging to underground; N.L. fem. suff. -cola, inhabitant; N. L. fem. n. Taenaricola, inhabitant of the underground	This genus belongs to the family Taenaricolaceae, order Taenaricolales, class Makaraimicrobium, phylum Omnitrophota. This monotypic genus currently has the same description that the type species for the genus, Taenaricola geyseris.	Taenaricola geyseris	gey.se'ris N.L. neut. n. geysirum, geyser, from Icelandic n. geysir; N. L. gen. geyseris, of or from a geyser	This species is the type for the genus Taenaricola. The genomes of this species is predicted to be 1.2 to 1.4 Mb, with % GC content of 42.51 to 42.8%. No very large ORF is encoded by any genomes of the species. Some components for the tight-adherence complex and genes related to acetogenesis are present. All genome assemblies available for this species originate from Crystal Geyser, near Green Ri…
			Vampiricoccoidia	Vam.pi.ri.coc.coi'di.a N.L. masc. n. Vampirococcoides, the type genus of the class; -ia, ending to denote a class; N.L. neut. pl. n. Vampirococcoidia, the class whose nomenclatural type is the genus Vampirococcoides	This class belongs to the phylum Omnitrophota. All previously visualized cells belonging to this class were small, and of approximately 0.2 µm. In serial-filtration experiments, most organisms were retained by filters with pore sizes at or below 0.2 µm. Genes encoding the tight-adherence complex were largely conserved, and most taxa have predicted capacity for acetogenesis through the bacterial W…	Vampiricoccoidales	Vam.pi.ri.coc.coi.da'les N.L. masc. n. Vampiricoccoides, the type genus of the order; -ales, ending to denote an order; N.L. fem. pl. n. Vampiricoccoidales, the order whose nomenclatural type is the genus Vampiricoccoides	This order belongs to the class Vampiricoccoidia, in the phylum Omnitrophota. Members of the order with available cell size data are < 0.3 µm. High-quality genomes of members of the order encode very large ORFs, components of tight-adherence complexes, and genes consistent with an acetogenic metabolism. Assemblies belonging to this order originate from lake and groundwater, as well as wastewater.…	Vampiricoccoidaceae	Vam.pi.ri.coc.coi.da'ce.ae N.L. masc. n. Vampiricoccoides, type genus of the family; L. fem. pl. suff. -aceae, ending to denote a family; N.L. fem. pl. n. Vampiricoccoidaceae, family of the genus Vampiricoccoides	This family belongs to the order Vampiricoccoidales, class Vampiricoccoidia, phylum Omnitrophota. When known, cells are small (< 0.3 µm). Very large ORFS, or genomic scaffolds homologous to very large ORFs are found in all genomes in the family. Most genomes encode tight-adherence complexes and genes for acetogenesis through the bacterial Wood-Ljungdahl pathway. Assemblies assigned to the family …	Vampiricoccoides	Vam.pi.ri.coc.coi'des N.L. n. vampirum, vampire; Gr. masc. n. kokkos, a grain, a seed; Gr. adj. suff. -oides, resembling, similar; N. L. masc. n. Vampiricoccoides, a coccus-like organisms with vampiric characteristics	This genus belongs to the family Vampiricoccoidaceae, order Vampiricoccoidales, class Vampiricoccoidia, phylum Omnitrophota. The genus description is currently the same as for the type species of the genus Vampiricoccoides archaeovorus.	Vampiricoccoides archaeovorus	ar.chae.o.vo'rus Gr. masc. adj. archaios, ancient; L. v. voro, to eat, devour; N. L. masc. n. archaeovorus, a devourer of archaeal cells; Basonym: Candidatus Vapirococcus archaeovorus Kizina et al., 2017	This species is the nomenclatural type for the genus Vampiricoccoides. Observed cells are 0.2 µm, and have been shown to be a parasitic coccus. The complete genome consists of one chromosome of 1.97 Mb with a %GC content of 52.91%. All components of the tight-adherence complex are encoded by the genome and genes associated with acetogenesis through the Wood-Ljungdahl pathwaym, and a group 4g hydr…
												Phelpsiimicrobium	Phelp.si.i.mi.cro'bi.um L. neut. n. microbium, a microbe; N. L. neut. n. Phelpsiimicrobium, a microbe named for Tommy J. Phelps, for his contributions to subsurface sciences	This monotypic genus belongs to the family Vampiricoccoidaceae, order Vampiricoccoidales, class Vampiricoccoidia, phylum Omnitrophota. The genus description is currently the same as for the species Phelpsiimicrobium noxiivivens, the nomenclatural type for the genus.	Phelpsiimicrobium noxiivivens	nox.i.i.vi'vens N.L. fem. n. Nox, from the Greek primordial goddess and personification of the night, Nox; L. pres. part. vivens, living; N. L. neut. adj. noxiivivens, living in darkness	This species is the type for the genus. The estimated genome size for the species is between 1.5 to 1.8 Mb, with %GC for genomes ranging between 43.80-44.08%. Genomes encode very large ORFs and some genes associated with acetogenesis. All assemblies assigned to this species originate from Crystal Geyser, near Green River, Utah, USA. The nomenclatural type for the species is the genome GCA_0018739…
						Duberdicusellales	Du.ber.di.cu.sel.la'les N.L. fem. n. Duberdicusella, type genus of the order; -ales, ending to denote an order; N.L. fem. pl. n. Duberdicusellales, the order whose nomenclatural type is the genus Duberdicusella	This order belongs to the class Vampiricoccoidia, phylum Omnitrophota. No data on cell sizes within the order is avialable. Genes encoding tight-adherence complexes, very large ORFs and those associated with energy metabolism are variably present. Assemblies belonging to this order originate predominantly from saline sediments, although several assemblies are derived from metagenomic samples from…	Duberdicusellaceae	Du.ber.di.cu.sel.la'ce.ae N.L. fem. n. Duberdicusella, type genus of the family; L. fem. pl. suff. -aceae, ending to denote a family; N.L. fem. pl. n. Duberdicusellaceae, family of the genus Duberdicusella	This family belongs to the order Duberdicusellales, class Vampirococcoidia, phylum Omnitrophota. As a monotypic family, the description of the family is currently the same as for the genus Duberdicusella, the nomenclatural type for the family.	Duberdicusella	Du.ber.di.cu'sel.la N. L. fem. dim. n. Duberdicusella, named for Duberdicus, the Lusitanian god of the sea and rivers	This genus belongs to the family Duberdicusellaceae, in the order Duberdicusellales, class Vampirococcoidia, phylum Omnitrophota. The description of this monotypic genus is currently the same as that of the nomenclatural type for the genus Duberdicusella sinuisediminis.	Duberdicusella sinuisediminis	si.nu.i.se.di.mi'nis L. masc. n. sinus, a bay; L. gen. n. sediminis, of sediment; N. L. gen. n. sinuisediminis, of sediment from a bay	This species is the nomenclatural type for the genus Duberdicusella. Estimated genome size for this species ranges between 1.3 to 1.8 Mb. GC content for this species is 34.9-35.9 %. No large ORFs are predicted for members of this species. Tight-adherence complex and acetogenesis genes are encoded by genomes of this species. All assemblies assigned to this species originated from deep-sea hydrothe…
						Fredricksoniimonadales	Fred.rick.so.ni.i.mo.na.da'les N.L. fem. n. Fredricksoniimonas, type genus of the order; L. fem. pl. suff. -ales, ending to denote an order; N.L. fem. pl. n. Fredricksoniimonadales, the order whose nomenclatural type is the genus Fredricksoniimonas	This order belongs to the class Vampiricoccoidia in the phylum Omnitrophota. Available cell size data indicate likely conservation of small cell sizes within the order. In contrast to other members of the class, the genomes belonging to this order encode diverse respiratory pathways and generally lack all genes associated with acetogenesis and the Wood-Ljungdahl pathway. Components for tight-adhe…	Fredricksoniimonadaceae	Fred.rick.so.ni.i.mo.na.da'ce.ae N.L. fem. n. Fredricksonimonas, type genus of the family; L. fem. pl. suff. -aceae, ending to denote a family; N.L. fem. pl. n. Fredricksonimonadaceae, family of the genus Fredricksonimonas	This family belongs to the order Fredricksoniimonadales, class Vampiricoccoidia, phylum Omnitrophota. Very large ORFs are pervasive within the family. Tight-adherence complexes are encoded by members of the order. Data regarding energy metabolism is uncertain. Assemblies assigned to the family have been derived from metagenomes from ground-, waste- and other freshwater, sediment, and soil. The no…	Fredricksoniimonas	Fred.rick.so.ni.i.mo'nas L. fem. n. monas, a monad; N.L. fem. n. Fredricksoniimonas, a monad named for James K. Fredrickson, for his contributions in the field of deep subsurface microbiology	This genus belongs to the family Fredricksoniimonadaceae, order Fredricksoniimonadales, class Vampiricoccoides, phylum Omnitrophota. Members of this genus encode very large ORFs, and genes for the tight-adherence complex and respiratory pathways. All assemblies assigned to this genus originate from freshwater or sediment. The nomenclatural type for the genus is the species Fredricksoniimonas aqui…	Fredricksoniimonas aquilentivivens	a.qui.len.ti.vi'vens L. fem. n. aqua, water; L. masc. adj. lentus, slow; L. pres. part. vivens, living; N.L. fem. adj. aquilentivivens, living in slow water	This species is the type for the genus Fredricksoniimonas. In addition to genus characteristics, the estimated genome size for this species is 2 Mb. The %GC for the genome is 50.78%. The assembly was recovered from a metagenomic sample of lake water from Nästjärnen, Sweden. The nomenclatural type for the species is the genome GCA_903860135.1.
															Fredricksoniimonas methanica	me.tha'ni.ca N.L. fem. n. methanum, methane; N.L. fem. adj. methanica, pertaining to methane	In addition to characteristics provided for the genus, the estimated genome size for members of this species is 2.2-2.4 Mb with a GC content of 54.57-55.10%. All assemblies originate from methane-rich freshwater lakes in Finland. The type for the species is the genome GCA_903901225.1.
									Zapsychraceae	Za.psy.chr.a'ce.ae N.L. masc. n. Zapsychrus, type genus of the family; -aceae, ending to denote a family; N.L. fem. pl. n. Zapsychraceae, family of the genus Collwellimicrobium	This family belongs to the order Fredricksonimonadales, in the class Vampirococcoidia, phylum Omnitrophota. Most assemblies within this family encode very large ORFs. Genomes in this family are derived from samples of soil, ground- and wastewater, geothermal springs and engineered environments. When reported samples were typically taken at circumneutral pH, microaerobic conditions and temperature…	Zapsychrus Williams et al., 2021	Za.psy'chrus Gr. za-, intensifying prefix; Gr. adj. psychros, cold; N.L. masc. n. Zapsychrus referring to organims living in very cold conditions.	This genus belongs to the family Zapsychraceae, order Fredricksoniimonadales, class Vampiricoccoides, phylum Omnitrophota. Available cell size data indicate small cells for members of the genus. Large ORFs are common in the genus. Some components of the tight-adherence complex is encoded in these genomes as well as genes for respiratory pathways. Assemblies originate from wastewater, a bioreactor…	Zapsychrus exilii Williams et al., 2021	ex.i'li.i L. gen. n. exilii, exile, refuge; referring to the isolation of Ace Lake, cut off from the Southern Ocean.	This species is the nomenclatural type for the genus Zapsychrus. The estimated genome size is 2.1 Mb. The nomenclatural type for the species is the genome 3300035698_1555, recovered from metagenomic sampling and sequencing of Ace Lake, Antarctica.
															Zapsychrus unditaenarius	un.di.tae.na.ri.um L. fem. n. unda, water; L. neut. adj. taenarium, below ground; N. L. neut. adj. unditaenarium, water from below ground	This species conservatively belongs to the genus Zapsychrus. Low AAI values, typically associated with family-level relationships are observed between this taxon and the nomenclatural type for the genus, however, relative evolutionary divergence based on a phylogenomic tree inferred from the condensed Bac120 marker set indicate likely genus-level relationships. In addition to characteristics prov…
						Ghiorseimicrobiales	Ghi.or.sei.mi.cro.bi.a'les N.L. neut. n. Ghiorseimicrobium, type genus of the order; -ales, ending to denote an order; N.L. neut. n. Ghiorseimicrobiales, the order whose nomenclatural type is the genus Ghiorseimicrobium	This order belongs to the class Vampiricoccoidia, phylum Omnitrophota. As a monotypic order, the description is currently the same as for the genus Ghiorseimicrobium, the nomenclatural type for the order.	Ghiorseimicrobiaceae	Ghi.or.sei.mi.cro.bi.a'ce.ae N.L. neut. n. Ghiorseimicrobium, type genus of the family; L. fem. pl. suff. -aceae, ending to denote a family; N.L. fem. pl. n. Ghiorseimicrobiaceae, family of the genus Ghiorseimicrobium	This family belongs to the order Ghiorseimicrobiales, class Vampirococcoidia, phylum Omnitrophota. The description for this monotypic family is the same as for its nomenclatural type, the genus Ghiorseimicrobium.	Ghiorseimicrobium	Ghi.or.sei.mi.cro'bi.um L. neut. n. microbium, a microbe; N.L. neut. n. Ghiorseimicrobium, a microbe named for William Ghiorse, for his contributions in geomicrobiology and biogeochemistry, particularly in the deep biosphere	This monotypic genus belongs to the family Ghiorseimicrobiaceae, order Ghiorseimicrobiales, class Vampiricoccoidia, phylum Omnitrophota. Currently, the description for this genus is the same as for its nomenclatural type Ghiorseimicrobium undicola.	Ghiorseimicrobium undicola	un.di'co.la L. fem. n. unda, water; N.L. fem. suff. -cola, an inhabitant of; N. L. masc./fem. n. undicola, an inhabitant of water (nominative in opposition)	This species is the type for the genus Ghiorseimicrobium. Predicted genome size estimates are 1.9-2 Mb with a GC content of 41.89%. Very large ORFs, tight-adherence complex genes and acetogenesis-associated genes are encoded by genomes of this species. The assembly for the species originate from groundwater from Crystal Geyser, Utah, USA. The nomenclatural type for the species is the genome GCA_0…
						Profunditerraquicolales	Pro.fun.di.ter.ra.qui.co.la'les N.L. fem. n. Profunditerraquicola, type genus of the order; -ales, ending to denote an order; N.L. fem. pl. n. Profunditerraquicolales, the order whose nomenclatural type is the genus Profunditerraquicola	This order belongs to the class Vampiricoccoidia, phylum Omnitrophota. Where data is available for putative cell sizes, the cells are below 0.3 µm. Very large ORFs are prevalent in the genomes belonging to this order. Most genomes code for tight-adherence complexes. Predicted energy metabolism in the order is acetogenesis through the Wood-Ljungdahl pathway. Members belonging to this order have be…	Profunditerraquicolaceae	Pro.fun.di.ter.ra.qui.co.la'ce.ae N.L. fem. n. Profunditerraquicola, type genus of the family; L. fem. pl. suff. -aceae, ending to denote a family; N.L. fem. pl. n. Profunditerraquicolaceae, the order whose nomenclatural type is the genus Profunditerraquicola	This family belongs to the order Profunditerraquicolales, class Vampiricoccoidia, phylum Omnitrophota. Very large ORFs are pervasive in this family. Assemblies assigned to this family originate from the same environments as the order Profunditerraquicolales. The nomenclatural type of the family is the genus Profunditerraquicola.	Profunditerraquicola	Pro.fun.di.ter.ra.qui'co.la L. neut. adj. profundum, deep; L. fem. n. terra, earth; L. fem. n. aqua, water; N.L. fem. suff. -cola, an inhabitant of; N. L. fem. n. Profunditerraquicola, inhabitant of water from the deep earth	This genus belongs to the family Profunditerraquicolaceae, order Profunditerraquicolales, class Vampiricoccoidia, phylum Omnitrophota. As a monotypic genus, the description is currently the same as for the type species Profunditerraquicola sanfordiae.	Profunditerraquicola sanfordiae	san.for'di.ae N. L. gen. fem. n. sanfordiae, of Sanford, referring to the Sanford Underground Research Facility (SURF)	This species is the type for the genus Profunditerraquicola. The estimated genome size is 1.7 Mb and %GC content is 41.02%. The genome encodes at least one very large ORF, tight-adherence comples and genes for acetogenesis via the Wood-Ljungdahl pathway. The assembly originated groundwater from the Sanford Underground Research Facility (SURF) in South Dakota. The nomenclatural type for the specie…
												Amyimicrobium	A.my.i.mi.cro'bi.um L. neut. n. microbium, a microbe; N.L. neut. n. Amyimicrobium, a microbe named for Penny S. Amy, for her contributions to research in the deep subsurface of Earth	This genus belongs to the family Profunditerraquicolaceae, order Profunditerraquicolales, class Vampiricoccoidia, phylum Omnitrophota. Observed cell sizes are small. Some genomes in the genus encode very large ORFs, tight-adherence complexes, and acetogenesis associated pathways. Where reported, all samples were taken at temperatures below 20 °C. All assemblies originate from fresh-, ground- or w…	Amyimicrobium silvilacustre	sil.vi.la.cus'tre L. fem. n. silva, forest; N.L. neut. adj. lacustre, of or belonging to the lake; N. L. neut. adj. silvilacustre, of or belonging to a forest lake	This species is the nomenclatural type for the genus Amyimicrobium. The estimated genome size is 1.7-2 Mb, and %GC content between 48.10 and 48.18%. This species encode a very large ORF and tight-adherence complex genes. Assemblies for this species originate from the boreal lake Alinen Mustajärvi, Finland. The nomenclatural type for the species is <awaiting accession number>, assembled from BioSa…
												Fontincolimonas	Font.in.co.li.mo'nas L. masc. n. fons, spring or fountain; L. v. incolo, inhabit; L. fem. n. monas, a monad; N. L. masc. n. Fontincolimonas, a monad that inhabits springs	This genus belongs to the family Profunditerraquicolaceae, order Profunditerraquicolales, class Vampiricoccoidia, phylum Omnitrophota. As a monotypic genus, the description is currently the same as for the type species Fontincolimonas calida.	Fontincolimonas calida	ca’li.da L. fem. adj. calida, warm, hot, referring to this organism being detected from a hot spring	This species is the nomenclatural type for the genus Fontincolimonas. The estimated genome size is 1.5 Mb with a %GC of 39.49%. Some genes associated with the tight-adherence complex and all genes investigated associated with acetogenesis through the bacterial Wood-Ljungdahl pathway are encoded by this genome. The assembly was derived from geothermal spring samples from Yellowstone National Park,…
												Sherwoodlollariibacterium	Sher.wood.lol.la.ri.i.bac.te'ri.um L. neut. n. bacterium, a bacterium; N.L. neut. n. Sherwoodlollariibacterium, a bacterium named for Barbara Sherwood Lollar, for her contributions to subsurface science	This genus belongs to the family Profunditerraquicolaceae, order Profunditerraquicolales, class Vampiricoccoidia, phylum Omnitrophota. Presence of genes encoding the tight-adherence complex is variable, and large ORFs are absent from genomes assigned to the genus. Assemblies originate from lake and groundwater. The nomenclatural type for the genus is Sherwoodlollaribacterium unditelluris.	Sherwoodlollaribacterium unditelluris	un.di.tel.lu'ris L. fem. n. unda, water; L. gen. n. telluris, from the earth; N. L. gen. n. unditelluris, of the water from the earth	This species is the nomenclatural type of the genus Sherwoodlollaribacterium. In addition to characteristics provided for the genus, estimated genome sizes for the species are 1.35-1.4 Mb, with %GC content of 41.02%. This species encode the genes for the tight-adherence complex, and genes associated with acetogenesis. The assemblies for this species is derived from metagenomes of groundwater from…
												Undivivens	Un.di.vi'vens L. fem. n. unda, water; L. pres. part. vivens, living; N. L. masc. n. Undivivens, living in water	This genus belongs to the family Profunditerraquicolaceae, order Profunditerraquicolales, class Vampiricoccoidia, phylum Omnitrophota. Assemblies for the genus originate from industrial wastewater and soil. The nomenclatural type for the genus is Undivivens industriae.	Undivivens industriae	in.dus'tri.a.e N.L. gen. n. industriae, of industry	This species is the type for the genus Undivivens. Estimated genome sizes range from 1.5-1.9 Mb with %GC content of 52.24-53.29%. No parasitism- or predation-associated genes are encoded by these genomes and some genes for acetogenesis are present in these genomes. All assemblies were derived from samples of wastewater. The nomenclatural type for the species is the genome GCA_012514745.1.
									Gygaeellaceae	Gy.ga.e.el.la'ce.ae N.L. fem. dim. n. Gygaella, type genus of the family; L. fem. pl. suff. -aceae, ending to denote a family; N.L. fem. pl. n. Gygaellaceae, family of the genus Gygaella	This family belongs to the order Profunditerraquicolales, class Vampiricoccoidia, phylum Omnitrophota. The available genome assembly belonging to this family was recovered from Ace Lake, Antarctica. The nomenclatural type for the family is the genus Gygaeella.	Gygaeella Williams et al., 2021	Gy.ga.e.el'la N. L. fem. n. Gygaea (Gr. Gugaia), lake nymph from Greek mythology; N.L. fem. dim. n. Gygaeella	This genus belongs to the family Gygaeellaceae, in the order Profunditerraquicolales, class Vampiricoccoidia, phylum Omnitrophota. The sole representative of this genus encodes a Group A3 [FeFe] hydrogenase. The nomenclatural type for the genus is the species Gygaeella obscura.	Gygaeella obscura Williams et al., 2021	ob.scu'ra L. fem. adj. obscura dark, hidden; referring to life at the bottom of Ace Lake	This species is the type for the genus Gygaeella. The estimated genome size for this species is 1.96 Mb. The nomenclatural type for this species is the genome recovered from Ace Lake, Antarctica, 3300035698_1934.
			Incertae sedis	-	-	Velesiimonadales	Ve.le.si.i.mo.na.da'les N.L. fem. n. Velesiimonas, type genus of the order; -ales, ending to denote an order; N.L. fem. pl. n. Velesiimonadales, the order whose nomenclatural type is the genus Velesiimonas	The taxonomic placement of this order is uncertain in the phylum Omnitrophota. This is a monotypic order and its description is currently the same as for its nomenclatural type, the genus Velesiimonas.	Velesiimonadaceae	Ve.le.si.i.mo.na.da'ce.ae N.L. fem. n. Velesiimonas, type genus of the family; L. fem. pl. suff. -aceae, ending to denote a family; N.L. fem. pl. n. Velesiimonadaceae, the order whose nomenclatural type is the genus Velesiimonas	This family belongs to the order Velesiimonadales. As a monotypic family, the description of the family is currently the same as for the genus Velesiimonas, the nomenclatural type for the family.	Velesiimonas	Ve.le.si.i.mo'nas N.L. n. Veles, the Slavic god of earth, waters and the underworld; L. fem. n. monas, a monad; N.L. fem. n. Velesiimonas, a monad named for Veles, the Slavic god of earth, waters and the underworld	This monotypic genus belongs to the family Velesiimonadaceae, and currently has the same description as its nomenclatural type, the species Velesiimonas alkalicola.	Velesiimonas alkalicola	al.ka.li'cola N.L. neut. n. alkali, alkali; N.L. fem. suff. -cola, an inhabitant of; N. L. fem. n. alkalicola, an inhabitant of alkaline environments	This species is the nomenclatural type for the genus Velesiimonas. No cell size data is available for this species. The predicted genome size of this species is quite small in comparison to other Omnitrophota, at approximately 1.3 Mb. The % GC content of the genome is 37.82%. No parasitism- or predation-associated genes are encoded by the genome for this species, and limited genes for energy meta…
* Bold face genera serve as nomenclatural types for the classes

## Sheet: Table S3 - AAI and ANI
a	b	aai	ani	relationship	taxon
1	1	100	100	Same Species	2-02-FULL-51-18 sp001804125
1	2	66.5322		Same Family	2-02-FULL-51-18
1	5	65.928		Same Family	2-02-FULL-51-18
1	12	62.8336		Same Order	2-02-FULL-51-18
1	13	51.7541		Same Order	2-02-FULL-51-18
1	15	59.445		Same Phylum	Omnitrophota
1	16	52.243		Same Phylum	Omnitrophota
1	18	54.3238		Same Phylum	Omnitrophota
1	21	51.9148		Same Phylum	Omnitrophota
1	23	54.3479		Same Phylum	Omnitrophota
1	24	53.1393		Same Phylum	Omnitrophota
1	25	50.4784		Same Phylum	Omnitrophota
1	40	52.6451		Same Phylum	Omnitrophota
1	45	52.5026		Same Phylum	Omnitrophota
1	46	53.4952		Same Phylum	Omnitrophota
1	50	52.3889		Same Phylum	Omnitrophota
1	53	50.9569		Same Phylum	Omnitrophota
1	54	50.9045		Same Phylum	Omnitrophota
1	55	52.4257		Same Phylum	Omnitrophota
1	57	50.9913		Same Phylum	Omnitrophota
1	58	51.0898		Same Phylum	Omnitrophota
1	59	55.9986		Same Phylum	Omnitrophota
1	60	54.5978		Same Phylum	Omnitrophota
1	61	48.7538		Same Phylum	Omnitrophota
1	63	51.9948		Same Phylum	Omnitrophota
1	65	50.4034		Same Phylum	Omnitrophota
1	67	51.8931		Same Phylum	Omnitrophota
1	69	50.5732		Same Phylum	Omnitrophota
1	70	52.0605		Same Phylum	Omnitrophota
1	71	50.2114		Same Phylum	Omnitrophota
1	72	50.3929		Same Phylum	Omnitrophota
1	74	52.0093		Same Phylum	Omnitrophota
1	76	54.5642		Same Phylum	Omnitrophota
1	80	53.8363		Same Phylum	Omnitrophota
1	84	51.3138		Same Phylum	Omnitrophota
1	85	53.015		Same Phylum	Omnitrophota
1	87	52.7838		Same Phylum	Omnitrophota
1	91	52.6194		Same Phylum	Omnitrophota
1	92	52.625		Same Phylum	Omnitrophota
1	93	51.8647		Same Phylum	Omnitrophota
1	94	48.8625		Same Phylum	Omnitrophota
1	95	48.6822		Same Phylum	Omnitrophota
1	96	45.7662		Same Phylum	Omnitrophota
1	100	49.3459		Same Phylum	Omnitrophota
1	101	50.6371		Same Phylum	Omnitrophota
1	103	50.2341		Same Phylum	Omnitrophota
1	104	47.3958		Same Phylum	Omnitrophota
1	107	50.7945		Same Phylum	Omnitrophota
1	108	49.503		Same Phylum	Omnitrophota
1	110	54.7012		Same Phylum	Omnitrophota
1	113	54.3259		Same Phylum	Omnitrophota
1	114	53.9509		Same Phylum	Omnitrophota
1	115	52.757		Same Phylum	Omnitrophota
1	116	49.9193		Same Phylum	Omnitrophota
1	131	55.3102		Same Phylum	Omnitrophota
1	133	56.7017		Same Phylum	Omnitrophota
1	136	54.3968		Same Phylum	Omnitrophota
1	140	51.7426		Same Phylum	Omnitrophota
1	144	52.6719		Same Phylum	Omnitrophota
1	146	54.366		Same Phylum	Omnitrophota
1	149	54.564		Same Phylum	Omnitrophota
1	150	51.7606		Same Phylum	Omnitrophota
1	152	54.766		Same Phylum	Omnitrophota
1	157	52.7581		Same Phylum	Omnitrophota
1	161	51.7689		Same Phylum	Omnitrophota
1	167	52.4		Same Phylum	Omnitrophota
1	169	53.888		Same Phylum	Omnitrophota
1	170	51.3255		Same Phylum	Omnitrophota
1	171	51.3237		Same Phylum	Omnitrophota
1	174	49.4449		Same Phylum	Omnitrophota
1	175	51.9822		Same Phylum	Omnitrophota
1	177	50.8951		Same Phylum	Omnitrophota
1	178	54.6875		Same Phylum	Omnitrophota
1	179	50.713		Same Phylum	Omnitrophota
1	183	51.698		Same Phylum	Omnitrophota
1	186	56.9157		Same Phylum	Omnitrophota
1	189	54.2717		Same Phylum	Omnitrophota
1	190	56.3089		Same Phylum	Omnitrophota
1	194	54.8458		Same Phylum	Omnitrophota
1	195	51.3724		Same Phylum	Omnitrophota
1	196	52.6908		Same Phylum	Omnitrophota
1	202	53.524		Same Phylum	Omnitrophota
1	205	48.4562		Same Phylum	Omnitrophota
1	210	52.8111		Same Phylum	Omnitrophota
1	211	51.5724		Same Phylum	Omnitrophota
1	213	50.4879		Same Phylum	Omnitrophota
1	214	51.6303		Same Phylum	Omnitrophota
1	215	51.3636		Same Phylum	Omnitrophota
1	218	46.64		Same Phylum	Omnitrophota
1	221	55.5231		Same Phylum	Omnitrophota
1	223	50.5		Same Phylum	Omnitrophota
1	224	47.0576		Same Phylum	Omnitrophota
1	226	42.9273		Same Phylum	Omnitrophota
1	227	46.9933		Same Phylum	Omnitrophota
1	228	45.15		Same Phylum	Omnitrophota
1	229	45.46		Same Phylum	Omnitrophota
1	230	49.1		Same Phylum	Omnitrophota
1	231	42.9833		Same Phylum	Omnitrophota
1	233	44.51		Same Phylum	Omnitrophota
1	236	48.4625		Same Phylum	Omnitrophota
1	238	49.8475		Same Phylum	Omnitrophota
1	240	50.0351		Same Phylum	Omnitrophota
1	241	51.4478		Same Phylum	Omnitrophota
1	247	47.9233		Same Phylum	Omnitrophota
1	249	48.3952		Same Phylum	Omnitrophota
1	253	47.8765		Same Phylum	Omnitrophota
1	258	54.7782		Same Phylum	Omnitrophota
1	259	50.6095		Same Phylum	Omnitrophota
1	260	50.9228		Same Phylum	Omnitrophota
1	262	50.1553		Same Phylum	Omnitrophota
1	263	50.9702		Same Phylum	Omnitrophota
1	264	50.57		Same Phylum	Omnitrophota
1	265	51.3826		Same Phylum	Omnitrophota
1	267	50.5596		Same Phylum	Omnitrophota
1	269	51.4333		Same Phylum	Omnitrophota
1	272	49.2429		Same Phylum	Omnitrophota
1	273	43.4091		Same Phylum	Omnitrophota
1	277	49.04		Same Phylum	Omnitrophota
1	280	48.5806		Same Phylum	Omnitrophota
1	285	50.7057		Same Phylum	Omnitrophota
1	288	46.6455		Same Phylum	Omnitrophota
1	289	48.2788		Same Phylum	Omnitrophota
1	294	50.9273		Same Phylum	Omnitrophota
1	295	47.44		Same Phylum	Omnitrophota
1	297	50.2452		Same Phylum	Omnitrophota
1	298	46.9		Same Phylum	Omnitrophota
1	301	50.0632		Same Phylum	Omnitrophota
1	302	47.66		Same Phylum	Omnitrophota
1	304	46.08		Same Phylum	Omnitrophota
1	305	54.0424		Same Phylum	Omnitrophota
1	306	47.3967		Same Phylum	Omnitrophota
1	307	49.2552		Same Phylum	Omnitrophota
1	308	45.4174		Same Phylum	Omnitrophota
1	309	53.4789		Same Phylum	Omnitrophota
1	310	52.9552		Same Phylum	Omnitrophota
1	314	55.0458		Same Phylum	Omnitrophota
1	315	42.7528		Same Phylum	Omnitrophota
1	317	43.5152		Same Phylum	Omnitrophota
1	318	57.7884		Same Phylum	Omnitrophota
1	320	61.0333		Same Phylum	Omnitrophota
1	321	48.7583		Same Phylum	Omnitrophota
1	325	48.2625		Same Phylum	Omnitrophota
1	329	51.92		Same Phylum	Omnitrophota
1	330	54.275		Same Phylum	Omnitrophota
1	331	52.4		Same Phylum	Omnitrophota
1	333	47.025		Same Phylum	Omnitrophota
1	334	38.125		Same Phylum	Omnitrophota
1	336	48.1692		Same Phylum	Omnitrophota
1	337	55.7611		Same Phylum	Omnitrophota
1	338	50.2458		Same Phylum	Omnitrophota
1	340	49.5476		Same Phylum	Omnitrophota
1	341	49.3571		Same Phylum	Omnitrophota
1	342	45.74		Same Phylum	Omnitrophota
1	343	40.7875		Same Phylum	Omnitrophota
1	344	42.5417		Same Phylum	Omnitrophota
1	345	36.125		Same Phylum	Omnitrophota
1	346	53.8		Same Phylum	Omnitrophota
1	347	49.0826		Same Phylum	Omnitrophota
1	348	47.9273		Same Phylum	Omnitrophota
1	349	44.6154		Same Phylum	Omnitrophota
1	350	47.8714		Same Phylum	Omnitrophota
1	359	39.75		Same Phylum	Omnitrophota
1	360	50.94		Same Phylum	Omnitrophota
1	361	47.05		Same Phylum	Omnitrophota
1	362	49.0938		Same Phylum	Omnitrophota
1	363	47.55		Same Phylum	Omnitrophota
1	364	49.3389		Same Phylum	Omnitrophota
1	365	45.8		Same Phylum	Omnitrophota
1	366	52.9583		Same Phylum	Omnitrophota
1	367	44.3286		Same Phylum	Omnitrophota
1	368	50.9417		Same Phylum	Omnitrophota
1	369	51.1833		Same Phylum	Omnitrophota
1	374	44.3857		Same Phylum	Omnitrophota
1	376	57.8542		Same Phylum	Omnitrophota
1	377	45.58		Same Phylum	Omnitrophota
1	380	44.77		Same Phylum	Omnitrophota
1	385	51.825		Same Phylum	Omnitrophota
1	387	49.9059		Same Phylum	Omnitrophota
1	388	44.4933		Same Phylum	Omnitrophota
1	389	45.8		Same Phylum	Omnitrophota
1	390	47.6818		Same Phylum	Omnitrophota
1	392	54.9059		Same Phylum	Omnitrophota
1	396	56.4337		Same Phylum	Omnitrophota
1	401	46.6		Same Phylum	Omnitrophota
1	405	51.8634		Same Phylum	Omnitrophota
1	406	45.1778		Same Phylum	Omnitrophota
1	407	48.6636		Same Phylum	Omnitrophota
1	408	53.0158		Same Phylum	Omnitrophota
1	415	49.4026		Same Phylum	Omnitrophota
1	417	57.3634		Same Phylum	Omnitrophota
1	418	51.192		Same Phylum	Omnitrophota
1	424	37.975		Same Domain
1	425	61.5		Same Domain
1	427	43.4714		Same Domain
1	428	42.05		Same Domain
1	429	43.5		Same Domain
1	431	46.3		Same Domain
1	432	40.2		Same Domain
1	433	45.9286		Same Domain
1	434	46.14		Same Domain
1	435	48.54		Same Domain
1	440	41.8333		Same Domain
1	442	37.5		Same Domain
1	444	39.0667		Same Domain
1	445	34.9		Same Domain
1	450	50.6667		Same Domain
2	1	66.5052		Same Family	2-02-FULL-51-18
2	2	100	100	Same Species	20-14-0-80-50-8 sp. GCA-001874025-1
2	5	75.3337		Same Genus	20-14-0-80-50-8
2	12	62.0563		Same Order	2-02-FULL-51-18
2	13	53.1761		Same Order	2-02-FULL-51-18
2	15	54.4571		Same Phylum	Omnitrophota
2	16	51.6461		Same Phylum	Omnitrophota
2	18	56.576		Same Phylum	Omnitrophota
2	21	54.7189		Same Phylum	Omnitrophota
2	23	54.788		Same Phylum	Omnitrophota
2	24	54.0844		Same Phylum	Omnitrophota
2	25	52.3865		Same Phylum	Omnitrophota
2	40	51.9108		Same Phylum	Omnitrophota
2	45	51.1176		Same Phylum	Omnitrophota
2	46	51.6656		Same Phylum	Omnitrophota
2	50	52.8512		Same Phylum	Omnitrophota
2	53	52.5977		Same Phylum	Omnitrophota
2	54	51.2893		Same Phylum	Omnitrophota
2	55	54.0622		Same Phylum	Omnitrophota
2	57	52.05		Same Phylum	Omnitrophota
2	58	50.8759		Same Phylum	Omnitrophota
2	59	56.1833		Same Phylum	Omnitrophota
2	60	54.3811		Same Phylum	Omnitrophota
2	61	47.91		Same Phylum	Omnitrophota
2	63	51.6754		Same Phylum	Omnitrophota
2	65	52.2125		Same Phylum	Omnitrophota
2	67	51.4365		Same Phylum	Omnitrophota
2	69	49.1769		Same Phylum	Omnitrophota
2	70	50.6103		Same Phylum	Omnitrophota
2	71	50.3319		Same Phylum	Omnitrophota
2	72	50.3022		Same Phylum	Omnitrophota
2	74	52.2238		Same Phylum	Omnitrophota
2	76	53.0672		Same Phylum	Omnitrophota
2	80	53.6448		Same Phylum	Omnitrophota
2	84	47.5723		Same Phylum	Omnitrophota
2	85	51.1918		Same Phylum	Omnitrophota
2	87	51.6346		Same Phylum	Omnitrophota
2	91	49.08		Same Phylum	Omnitrophota
2	92	49.55		Same Phylum	Omnitrophota
2	93	48.9		Same Phylum	Omnitrophota
2	94	45.375		Same Phylum	Omnitrophota
2	95	47.8114		Same Phylum	Omnitrophota
2	96	45.1725		Same Phylum	Omnitrophota
2	100	49.6133		Same Phylum	Omnitrophota
2	101	46.808		Same Phylum	Omnitrophota
2	103	45.6036		Same Phylum	Omnitrophota
2	104	49		Same Phylum	Omnitrophota
2	107	50.86		Same Phylum	Omnitrophota
2	108	49.2633		Same Phylum	Omnitrophota
2	110	55.2831		Same Phylum	Omnitrophota
2	113	54.9153		Same Phylum	Omnitrophota
2	114	55.0267		Same Phylum	Omnitrophota
2	115	53.0928		Same Phylum	Omnitrophota
2	116	54.9262		Same Phylum	Omnitrophota
2	131	54.9853		Same Phylum	Omnitrophota
2	133	58.3069		Same Phylum	Omnitrophota
2	136	56.0079		Same Phylum	Omnitrophota
2	140	51.4027		Same Phylum	Omnitrophota
2	144	52.8404		Same Phylum	Omnitrophota
2	146	53.059		Same Phylum	Omnitrophota
2	149	54.1373		Same Phylum	Omnitrophota
2	150	52.7885		Same Phylum	Omnitrophota
2	152	54.5943		Same Phylum	Omnitrophota
2	157	54.2072		Same Phylum	Omnitrophota
2	161	52.9075		Same Phylum	Omnitrophota
2	167	53.1167		Same Phylum	Omnitrophota
2	169	54.7516		Same Phylum	Omnitrophota
2	170	51.681		Same Phylum	Omnitrophota
2	171	51.654		Same Phylum	Omnitrophota
2	174	50.9159		Same Phylum	Omnitrophota
2	175	51.6833		Same Phylum	Omnitrophota
2	177	52.6872		Same Phylum	Omnitrophota
2	178	53.972		Same Phylum	Omnitrophota
2	179	52.6686		Same Phylum	Omnitrophota
2	183	52.4237		Same Phylum	Omnitrophota
2	186	51.6963		Same Phylum	Omnitrophota
2	189	49.3983		Same Phylum	Omnitrophota
2	190	55.169		Same Phylum	Omnitrophota
2	194	52.3761		Same Phylum	Omnitrophota
2	195	51.4203		Same Phylum	Omnitrophota
2	196	51.9789		Same Phylum	Omnitrophota
2	202	51.082		Same Phylum	Omnitrophota
2	205	50.3857		Same Phylum	Omnitrophota
2	210	48.9789		Same Phylum	Omnitrophota
2	211	51.8091		Same Phylum	Omnitrophota
2	213	52.868		Same Phylum	Omnitrophota
2	214	52.6207		Same Phylum	Omnitrophota
2	215	45.88		Same Phylum	Omnitrophota
2	218	47.84		Same Phylum	Omnitrophota
2	221	43.9059		Same Phylum	Omnitrophota
2	223	44.9105		Same Phylum	Omnitrophota
2	224	48.0625		Same Phylum	Omnitrophota
2	226	49.475		Same Phylum	Omnitrophota
2	227	47.925		Same Phylum	Omnitrophota
2	228	48.75		Same Phylum	Omnitrophota
2	229	41.92		Same Phylum	Omnitrophota
2	230	48.3286		Same Phylum	Omnitrophota
2	231	45.2231		Same Phylum	Omnitrophota
2	233	42.9158		Same Phylum	Omnitrophota
2	236	48.1588		Same Phylum	Omnitrophota
2	238	54.0375		Same Phylum	Omnitrophota
2	240	57.1526		Same Phylum	Omnitrophota
2	241	50.8742		Same Phylum	Omnitrophota
2	247	51.7		Same Phylum	Omnitrophota
2	249	52.12		Same Phylum	Omnitrophota
2	253	49.9423		Same Phylum	Omnitrophota
2	258	55.3417		Same Phylum	Omnitrophota
2	259	48.3333		Same Phylum	Omnitrophota
2	260	49.3721		Same Phylum	Omnitrophota
2	262	53.5118		Same Phylum	Omnitrophota
2	263	54.2667		Same Phylum	Omnitrophota
2	264	49.1808		Same Phylum	Omnitrophota
2	265	54.2556		Same Phylum	Omnitrophota
2	267	49.3118		Same Phylum	Omnitrophota
2	269	55.7286		Same Phylum	Omnitrophota
2	272	59.1556		Same Phylum	Omnitrophota
2	273	49.6105		Same Phylum	Omnitrophota
2	277	37.6444		Same Phylum	Omnitrophota
2	280	48.2895		Same Phylum	Omnitrophota
2	285	49.5677		Same Phylum	Omnitrophota
2	288	45.4565		Same Phylum	Omnitrophota
2	289	47.4185		Same Phylum	Omnitrophota
2	294	47.7048		Same Phylum	Omnitrophota
2	295	45.9889		Same Phylum	Omnitrophota
2	297	45.6947		Same Phylum	Omnitrophota
2	298	49.0211		Same Phylum	Omnitrophota
2	301	51.3148		Same Phylum	Omnitrophota
2	302	50.34		Same Phylum	Omnitrophota
2	304	50.7687		Same Phylum	Omnitrophota
2	305	56.3306		Same Phylum	Omnitrophota
2	306	48.9758		Same Phylum	Omnitrophota
2	307	51.7706		Same Phylum	Omnitrophota
2	308	50.3103		Same Phylum	Omnitrophota
2	309	56.1943		Same Phylum	Omnitrophota
2	310	54.3385		Same Phylum	Omnitrophota
2	314	50.6846		Same Phylum	Omnitrophota
2	315	43.1154		Same Phylum	Omnitrophota
2	317	47.8947		Same Phylum	Omnitrophota
2	318	51.9167		Same Phylum	Omnitrophota
2	320	37.3		Same Phylum	Omnitrophota
2	321	45.6308		Same Phylum	Omnitrophota
2	325	49.675		Same Phylum	Omnitrophota
2	329	45.7714		Same Phylum	Omnitrophota
2	330	51.24		Same Phylum	Omnitrophota
2	331	59.8667		Same Phylum	Omnitrophota
2	333	56.2		Same Phylum	Omnitrophota
2	334	48.26		Same Phylum	Omnitrophota
2	336	37.6111		Same Phylum	Omnitrophota
2	337	53.4429		Same Phylum	Omnitrophota
2	338	45.2667		Same Phylum	Omnitrophota
2	340	48.0059		Same Phylum	Omnitrophota
2	341	48.1118		Same Phylum	Omnitrophota
2	342	48.9667		Same Phylum	Omnitrophota
2	343	42.975		Same Phylum	Omnitrophota
2	344	47.9632		Same Phylum	Omnitrophota
2	345	41.1		Same Phylum	Omnitrophota
2	346	52.3		Same Phylum	Omnitrophota
2	347	45.5111		Same Phylum	Omnitrophota
2	348	55.5889		Same Phylum	Omnitrophota
2	349	42.99		Same Phylum	Omnitrophota
2	350	50		Same Phylum	Omnitrophota
2	359	40.3333		Same Phylum	Omnitrophota
2	360	45.175		Same Phylum	Omnitrophota
2	361	43.6889		Same Phylum	Omnitrophota
2	362	44.8937		Same Phylum	Omnitrophota
2	363	57.3333		Same Phylum	Omnitrophota
2	364	47.55		Same Phylum	Omnitrophota
2	365	45.0882		Same Phylum	Omnitrophota
2	366	45.2786		Same Phylum	Omnitrophota
2	367	51.2846		Same Phylum	Omnitrophota
2	368	52.6		Same Phylum	Omnitrophota
2	369	52.8833		Same Phylum	Omnitrophota
2	374	46.5429		Same Phylum	Omnitrophota
2	376	54.9		Same Phylum	Omnitrophota
2	377	51.0846		Same Phylum	Omnitrophota
2	380	50		Same Phylum	Omnitrophota
2	385	42.7889		Same Phylum	Omnitrophota
2	387	45.2818		Same Phylum	Omnitrophota
2	388	43.7444		Same Phylum	Omnitrophota
2	389	39.48		Same Phylum	Omnitrophota
2	390	52.405		Same Phylum	Omnitrophota
2	392	50.1824		Same Phylum	Omnitrophota
2	396	47.9333		Same Phylum	Omnitrophota
2	401	47.145		Same Phylum	Omnitrophota
2	405	46.412		Same Phylum	Omnitrophota
2	406	42.1286		Same Phylum	Omnitrophota
2	407	44.18		Same Phylum	Omnitrophota
2	408	49.55		Same Phylum	Omnitrophota
2	415	46.4667		Same Phylum	Omnitrophota
2	417	53.5		Same Phylum	Omnitrophota
2	418	49.9357		Same Phylum	Omnitrophota
2	424	39.8125		Same Domain
2	425	43.9833		Same Domain
2	427	43.4333		Same Domain
2	428	45.2429		Same Domain
2	429	36.0333		Same Domain
2	431	47.8		Same Domain
2	432	42.88		Same Domain
2	433	47.65		Same Domain
2	434	41.6143		Same Domain
2	435	43.35		Same Domain
2	440	46.04		Same Domain
2	442	45.44		Same Domain
2	444	42.0167		Same Domain
2	445	33		Same Domain
2	446	35.22		Same Domain
2	450	44.0308		Same Domain
5	1	65.8324		Same Family	2-02-FULL-51-18
5	2	75.3702		Same Genus	20-14-0-80-50-8
5	5	100	100	Same Species	20-14-0-80-50-8 sp002779345
5	12	61.0318		Same Order	2-02-FULL-51-18
5	13	51.3888		Same Order	2-02-FULL-51-18
5	15	52.1167		Same Phylum	Omnitrophota
5	16	51.9085		Same Phylum	Omnitrophota
5	18	54.8543		Same Phylum	Omnitrophota
5	21	53.9829		Same Phylum	Omnitrophota
5	23	53.9419		Same Phylum	Omnitrophota
5	24	51.8174		Same Phylum	Omnitrophota
5	25	52.1424		Same Phylum	Omnitrophota
5	40	54.875		Same Phylum	Omnitrophota
5	45	50.92		Same Phylum	Omnitrophota
5	46	54.65		Same Phylum	Omnitrophota
5	50	53.0714		Same Phylum	Omnitrophota
5	53	53.7737		Same Phylum	Omnitrophota
5	54	50.9886		Same Phylum	Omnitrophota
5	55	51.6208		Same Phylum	Omnitrophota
5	57	54.9889		Same Phylum	Omnitrophota
5	58	48.8594		Same Phylum	Omnitrophota
5	59	58.8216		Same Phylum	Omnitrophota
5	60	56.215		Same Phylum	Omnitrophota
5	61	49.3125		Same Phylum	Omnitrophota
5	63	52.8889		Same Phylum	Omnitrophota
5	65	49.4		Same Phylum	Omnitrophota
5	67	51.7565		Same Phylum	Omnitrophota
5	69	50.4926		Same Phylum	Omnitrophota
5	70	50.7792		Same Phylum	Omnitrophota
5	71	50.9862		Same Phylum	Omnitrophota
5	72	45.2848		Same Phylum	Omnitrophota
5	74	49.406		Same Phylum	Omnitrophota
5	76	53.8857		Same Phylum	Omnitrophota
5	80	55.3318		Same Phylum	Omnitrophota
5	84	51.3		Same Phylum	Omnitrophota
5	85	50.4579		Same Phylum	Omnitrophota
5	87	49.136		Same Phylum	Omnitrophota
5	91	50.3656		Same Phylum	Omnitrophota
5	92	50.0021		Same Phylum	Omnitrophota
5	93	51.2682		Same Phylum	Omnitrophota
5	94	39.1059		Same Phylum	Omnitrophota
5	95	45.3357		Same Phylum	Omnitrophota
5	96	44.1816		Same Phylum	Omnitrophota
5	100	48.275		Same Phylum	Omnitrophota
5	101	44.2119		Same Phylum	Omnitrophota
5	103	43.2107		Same Phylum	Omnitrophota
5	104	43.7606		Same Phylum	Omnitrophota
5	107	48.7118		Same Phylum	Omnitrophota
5	108	51.6125		Same Phylum	Omnitrophota
5	110	52.1		Same Phylum	Omnitrophota
5	113	51.8444		Same Phylum	Omnitrophota
5	114	53.162		Same Phylum	Omnitrophota
5	115	51.3436		Same Phylum	Omnitrophota
5	116	50.6435		Same Phylum	Omnitrophota
5	131	56.3571		Same Phylum	Omnitrophota
5	133	58.0316		Same Phylum	Omnitrophota
5	136	54.4432		Same Phylum	Omnitrophota
5	140	53.0906		Same Phylum	Omnitrophota
5	144	55.4304		Same Phylum	Omnitrophota
5	146	52.8188		Same Phylum	Omnitrophota
5	149	55.3821		Same Phylum	Omnitrophota
5	150	53.0742		Same Phylum	Omnitrophota
5	152	55.2657		Same Phylum	Omnitrophota
5	157	51.6757		Same Phylum	Omnitrophota
5	161	52.3235		Same Phylum	Omnitrophota
5	167	52.74		Same Phylum	Omnitrophota
5	169	54.9471		Same Phylum	Omnitrophota
5	170	54.2878		Same Phylum	Omnitrophota
5	171	50.2635		Same Phylum	Omnitrophota
5	174	49.8795		Same Phylum	Omnitrophota
5	175	52.8153		Same Phylum	Omnitrophota
5	177	53.6705		Same Phylum	Omnitrophota
5	178	52.1705		Same Phylum	Omnitrophota
5	179	51.5021		Same Phylum	Omnitrophota
5	183	51.9871		Same Phylum	Omnitrophota
5	186	55.16		Same Phylum	Omnitrophota
5	189	53.5189		Same Phylum	Omnitrophota
5	190	54.3057		Same Phylum	Omnitrophota
5	194	53.7878		Same Phylum	Omnitrophota
5	195	53.4191		Same Phylum	Omnitrophota
5	196	52.6929		Same Phylum	Omnitrophota
5	202	52.5035		Same Phylum	Omnitrophota
5	205	43.675		Same Phylum	Omnitrophota
5	210	52.1231		Same Phylum	Omnitrophota
5	211	49.0765		Same Phylum	Omnitrophota
5	213	52.6059		Same Phylum	Omnitrophota
5	214	53.4353		Same Phylum	Omnitrophota
5	215	45.4		Same Phylum	Omnitrophota
5	218	45.9333		Same Phylum	Omnitrophota
5	221	48.5688		Same Phylum	Omnitrophota
5	223	50.3571		Same Phylum	Omnitrophota
5	224	51.4037		Same Phylum	Omnitrophota
5	226	40.1		Same Phylum	Omnitrophota
5	227	40.8286		Same Phylum	Omnitrophota
5	228	41.325		Same Phylum	Omnitrophota
5	229	40.8		Same Phylum	Omnitrophota
5	230	42.84		Same Phylum	Omnitrophota
5	231	37.8429		Same Phylum	Omnitrophota
5	233	39.3375		Same Phylum	Omnitrophota
5	236	45.5583		Same Phylum	Omnitrophota
5	238	53		Same Phylum	Omnitrophota
5	240	52.0556		Same Phylum	Omnitrophota
5	241	54.3		Same Phylum	Omnitrophota
5	247	42.68		Same Phylum	Omnitrophota
5	249	52.425		Same Phylum	Omnitrophota
5	253	47.9143		Same Phylum	Omnitrophota
5	258	54.0429		Same Phylum	Omnitrophota
5	259	53.4941		Same Phylum	Omnitrophota
5	260	51.8135		Same Phylum	Omnitrophota
5	262	60.9875		Same Phylum	Omnitrophota
5	263	52.6455		Same Phylum	Omnitrophota
5	264	44.7778		Same Phylum	Omnitrophota
5	265	49.95		Same Phylum	Omnitrophota
5	267	49.6667		Same Phylum	Omnitrophota
5	269	51.0875		Same Phylum	Omnitrophota
5	272	57.2083		Same Phylum	Omnitrophota
5	273	49.9211		Same Phylum	Omnitrophota
5	277	44.635		Same Phylum	Omnitrophota
5	280	50.0048		Same Phylum	Omnitrophota
5	285	49.156		Same Phylum	Omnitrophota
5	288	50.636		Same Phylum	Omnitrophota
5	289	49.6458		Same Phylum	Omnitrophota
5	294	49.2846		Same Phylum	Omnitrophota
5	295	50.1077		Same Phylum	Omnitrophota
5	297	46.15		Same Phylum	Omnitrophota
5	298	49.0261		Same Phylum	Omnitrophota
5	301	53.5812		Same Phylum	Omnitrophota
5	302	52.9143		Same Phylum	Omnitrophota
5	304	49.3895		Same Phylum	Omnitrophota
5	305	56.1929		Same Phylum	Omnitrophota
5	306	45.5783		Same Phylum	Omnitrophota
5	307	44.6		Same Phylum	Omnitrophota
5	308	45.5154		Same Phylum	Omnitrophota
5	309	53.94		Same Phylum	Omnitrophota
5	310	49.5857		Same Phylum	Omnitrophota
5	314	55.1211		Same Phylum	Omnitrophota
5	315	42.8444		Same Phylum	Omnitrophota
5	317	47.5133		Same Phylum	Omnitrophota
5	318	48.5		Same Phylum	Omnitrophota
5	320	41.2667		Same Phylum	Omnitrophota
5	321	40.5333		Same Phylum	Omnitrophota
5	325	43.95		Same Phylum	Omnitrophota
5	329	49.86		Same Phylum	Omnitrophota
5	330	49.32		Same Phylum	Omnitrophota
5	331	56.2667		Same Phylum	Omnitrophota
5	333	54.85		Same Phylum	Omnitrophota
5	334	48.6		Same Phylum	Omnitrophota
5	336	44.8429		Same Phylum	Omnitrophota
5	337	47.9		Same Phylum	Omnitrophota
5	338	54.1917		Same Phylum	Omnitrophota
5	340	46.0375		Same Phylum	Omnitrophota
5	341	43.0375		Same Phylum	Omnitrophota
5	342	49.8167		Same Phylum	Omnitrophota
5	343	47.0429		Same Phylum	Omnitrophota
5	344	51.1933		Same Phylum	Omnitrophota
5	345	38.6		Same Phylum	Omnitrophota
5	347	45.6083		Same Phylum	Omnitrophota
5	348	43.425		Same Phylum	Omnitrophota
5	349	50.75		Same Phylum	Omnitrophota
5	350	39.3625		Same Phylum	Omnitrophota
5	359	35.1		Same Phylum	Omnitrophota
5	360	44.5		Same Phylum	Omnitrophota
5	361	45.85		Same Phylum	Omnitrophota
5	362	47.9		Same Phylum	Omnitrophota
5	363	69.16		Same Phylum	Omnitrophota
5	364	48.52		Same Phylum	Omnitrophota
5	365	41.7182		Same Phylum	Omnitrophota
5	366	47.8		Same Phylum	Omnitrophota
5	367	55.375		Same Phylum	Omnitrophota
5	368	61.325		Same Phylum	Omnitrophota
5	369	57.3444		Same Phylum	Omnitrophota
5	374	49.6		Same Phylum	Omnitrophota
5	376	51.75		Same Phylum	Omnitrophota
5	377	47.34		Same Phylum	Omnitrophota
5	380	49.175		Same Phylum	Omnitrophota
5	385	24.9		Same Phylum	Omnitrophota
5	387	42.525		Same Phylum	Omnitrophota
5	388	47.2167		Same Phylum	Omnitrophota
5	389	48.4667		Same Phylum	Omnitrophota
5	390	53.1667		Same Phylum	Omnitrophota
5	392	50.2		Same Phylum	Omnitrophota
5	396	46.37		Same Phylum	Omnitrophota
5	401	46.575		Same Phylum	Omnitrophota
5	405	51.1435		Same Phylum	Omnitrophota
5	406	44.55		Same Phylum	Omnitrophota
5	407	45.1727		Same Phylum	Omnitrophota
5	408	53.564		Same Phylum	Omnitrophota
5	415	47.3158		Same Phylum	Omnitrophota
5	417	47.9478		Same Phylum	Omnitrophota
5	418	46.2381		Same Phylum	Omnitrophota
5	424	52.9333		Same Domain
5	425	56.9		Same Domain
5	427	50.2		Same Domain
5	428	57.8		Same Domain
5	429	46		Same Domain
5	431	46		Same Domain
5	433	45.25		Same Domain
5	434	34.65		Same Domain
5	435	47.55		Same Domain
5	440	48.1333		Same Domain
5	442	50.525		Same Domain
5	444	49.5		Same Domain
5	445	45.85		Same Domain
5	450	53		Same Domain
12	1	62.8262		Same Order	2-02-FULL-51-18
12	2	62.1384		Same Order	2-02-FULL-51-18
12	5	61.0115		Same Order	2-02-FULL-51-18
12	12	100	99.9999	Same Species	GCA-001804145-1 sp. GCA-001804145-1
12	13	52.2669		Same Order	2-02-FULL-51-18
12	15	51.05		Same Phylum	Omnitrophota
12	16	52.5472		Same Phylum	Omnitrophota
12	18	54.8202		Same Phylum	Omnitrophota
12	21	52.5012		Same Phylum	Omnitrophota
12	23	53.7161		Same Phylum	Omnitrophota
12	24	64.5077		Same Phylum	Omnitrophota
12	25	63.3649		Same Phylum	Omnitrophota
12	40	59.2645		Same Phylum	Omnitrophota
12	45	58.5673		Same Phylum	Omnitrophota
12	46	56.2466		Same Phylum	Omnitrophota
12	50	56.5798		Same Phylum	Omnitrophota
12	53	63.1505		Same Phylum	Omnitrophota
12	54	59.7547		Same Phylum	Omnitrophota
12	55	53.3191		Same Phylum	Omnitrophota
12	57	46.6		Same Phylum	Omnitrophota
12	58	45.1568		Same Phylum	Omnitrophota
12	59	57.9182		Same Phylum	Omnitrophota
12	60	54.3589		Same Phylum	Omnitrophota
12	61	47.5		Same Phylum	Omnitrophota
12	63	50.2245		Same Phylum	Omnitrophota
12	65	53.8286		Same Phylum	Omnitrophota
12	67	50.1696		Same Phylum	Omnitrophota
12	69	48.1419		Same Phylum	Omnitrophota
12	70	51.4969		Same Phylum	Omnitrophota
12	71	49.4208		Same Phylum	Omnitrophota
12	72	46.8478		Same Phylum	Omnitrophota
12	74	48.2527		Same Phylum	Omnitrophota
12	76	51.0089		Same Phylum	Omnitrophota
12	80	53.3729		Same Phylum	Omnitrophota
12	84	51.0452		Same Phylum	Omnitrophota
12	85	49.1056		Same Phylum	Omnitrophota
12	87	49.46		Same Phylum	Omnitrophota
12	91	50.948		Same Phylum	Omnitrophota
12	92	54.05		Same Phylum	Omnitrophota
12	93	48.54		Same Phylum	Omnitrophota
12	94	44.6625		Same Phylum	Omnitrophota
12	95	44.8136		Same Phylum	Omnitrophota
12	96	44.7114		Same Phylum	Omnitrophota
12	100	51.4417		Same Phylum	Omnitrophota
12	101	42.2621		Same Phylum	Omnitrophota
12	103	45.9174		Same Phylum	Omnitrophota
12	104	43.15		Same Phylum	Omnitrophota
12	107	49.1775		Same Phylum	Omnitrophota
12	108	46.6511		Same Phylum	Omnitrophota
12	110	56.3583		Same Phylum	Omnitrophota
12	113	56.4923		Same Phylum	Omnitrophota
12	114	56.0333		Same Phylum	Omnitrophota
12	115	52.5871		Same Phylum	Omnitrophota
12	116	54.6681		Same Phylum	Omnitrophota
12	131	50.7395		Same Phylum	Omnitrophota
12	133	51.9769		Same Phylum	Omnitrophota
12	136	51.4312		Same Phylum	Omnitrophota
12	140	51.1333		Same Phylum	Omnitrophota
12	144	50.7356		Same Phylum	Omnitrophota
12	146	52.0055		Same Phylum	Omnitrophota
12	149	54.6728		Same Phylum	Omnitrophota
12	150	51.5471		Same Phylum	Omnitrophota
12	152	51.1009		Same Phylum	Omnitrophota
12	157	49.7369		Same Phylum	Omnitrophota
12	161	50.3535		Same Phylum	Omnitrophota
12	167	52.15		Same Phylum	Omnitrophota
12	169	48.4978		Same Phylum	Omnitrophota
12	170	49.7084		Same Phylum	Omnitrophota
12	171	52.1586		Same Phylum	Omnitrophota
12	174	48.4129		Same Phylum	Omnitrophota
12	175	49.9215		Same Phylum	Omnitrophota
12	177	51.229		Same Phylum	Omnitrophota
12	178	51.0486		Same Phylum	Omnitrophota
12	179	47.2725		Same Phylum	Omnitrophota
12	183	47.289		Same Phylum	Omnitrophota
12	186	54.3512		Same Phylum	Omnitrophota
12	189	52.1514		Same Phylum	Omnitrophota
12	190	53.3736		Same Phylum	Omnitrophota
12	194	52.3505		Same Phylum	Omnitrophota
12	195	46.1356		Same Phylum	Omnitrophota
12	196	51.7468		Same Phylum	Omnitrophota
12	202	51.5549		Same Phylum	Omnitrophota
12	205	40.1714		Same Phylum	Omnitrophota
12	210	50.2062		Same Phylum	Omnitrophota
12	211	48.6684		Same Phylum	Omnitrophota
12	213	46.244		Same Phylum	Omnitrophota
12	214	45.0353		Same Phylum	Omnitrophota
12	215	45.0714		Same Phylum	Omnitrophota
12	218	43.9375		Same Phylum	Omnitrophota
12	221	47.9889		Same Phylum	Omnitrophota
12	223	46.8077		Same Phylum	Omnitrophota
12	224	41.1531		Same Phylum	Omnitrophota
12	226	45.8857		Same Phylum	Omnitrophota
12	227	40.7667		Same Phylum	Omnitrophota
12	228	41.5667		Same Phylum	Omnitrophota
12	229	41.7417		Same Phylum	Omnitrophota
12	230	43.8083		Same Phylum	Omnitrophota
12	231	44.42		Same Phylum	Omnitrophota
12	233	47.9		Same Phylum	Omnitrophota
12	236	51.0429		Same Phylum	Omnitrophota
12	238	48.1481		Same Phylum	Omnitrophota
12	240	49.3308		Same Phylum	Omnitrophota
12	241	49.4946		Same Phylum	Omnitrophota
12	247	47.5217		Same Phylum	Omnitrophota
12	249	47.5211		Same Phylum	Omnitrophota
12	253	42.94		Same Phylum	Omnitrophota
12	258	51.3904		Same Phylum	Omnitrophota
12	259	49.0819		Same Phylum	Omnitrophota
12	260	49.524		Same Phylum	Omnitrophota
12	262	48.34		Same Phylum	Omnitrophota
12	263	44.6333		Same Phylum	Omnitrophota
12	264	47.522		Same Phylum	Omnitrophota
12	265	54.8625		Same Phylum	Omnitrophota
12	267	51.9522		Same Phylum	Omnitrophota
12	269	50.4893		Same Phylum	Omnitrophota
12	272	48.3773		Same Phylum	Omnitrophota
12	273	43.5458		Same Phylum	Omnitrophota
12	277	43.556		Same Phylum	Omnitrophota
12	280	43.8		Same Phylum	Omnitrophota
12	285	46.0194		Same Phylum	Omnitrophota
12	288	43.115		Same Phylum	Omnitrophota
12	289	47.5778		Same Phylum	Omnitrophota
12	294	45.9744		Same Phylum	Omnitrophota
12	295	43.4067		Same Phylum	Omnitrophota
12	297	41.656		Same Phylum	Omnitrophota
12	298	41.8353		Same Phylum	Omnitrophota
12	301	44.3644		Same Phylum	Omnitrophota
12	302	54.4571		Same Phylum	Omnitrophota
12	304	46.0742		Same Phylum	Omnitrophota
12	305	50.4125		Same Phylum	Omnitrophota
12	306	46.6342		Same Phylum	Omnitrophota
12	307	48.9		Same Phylum	Omnitrophota
12	308	48.469		Same Phylum	Omnitrophota
12	309	49.6148		Same Phylum	Omnitrophota
12	310	48.0957		Same Phylum	Omnitrophota
12	314	43.7437		Same Phylum	Omnitrophota
12	315	45.9		Same Phylum	Omnitrophota
12	317	49.82		Same Phylum	Omnitrophota
12	318	45.3375		Same Phylum	Omnitrophota
12	320	47.5		Same Phylum	Omnitrophota
12	321	38.3182		Same Phylum	Omnitrophota
12	325	62.6		Same Phylum	Omnitrophota
12	329	42.2778		Same Phylum	Omnitrophota
12	330	43.3286		Same Phylum	Omnitrophota
12	331	44.6125		Same Phylum	Omnitrophota
12	333	43.38		Same Phylum	Omnitrophota
12	334	40.05		Same Phylum	Omnitrophota
12	336	43.0375		Same Phylum	Omnitrophota
12	337	42.125		Same Phylum	Omnitrophota
12	338	42.8636		Same Phylum	Omnitrophota
12	340	42.28		Same Phylum	Omnitrophota
12	341	43.9048		Same Phylum	Omnitrophota
12	342	36.7667		Same Phylum	Omnitrophota
12	343	42.7		Same Phylum	Omnitrophota
12	344	46.0789		Same Phylum	Omnitrophota
12	346	44.14		Same Phylum	Omnitrophota
12	347	44.6167		Same Phylum	Omnitrophota
12	348	42.4444		Same Phylum	Omnitrophota
12	349	48.15		Same Phylum	Omnitrophota
12	350	39.305		Same Phylum	Omnitrophota
12	359	42.44		Same Phylum	Omnitrophota
12	360	47.5		Same Phylum	Omnitrophota
12	361	38.4667		Same Phylum	Omnitrophota
12	362	38.94		Same Phylum	Omnitrophota
12	363	47.5		Same Phylum	Omnitrophota
12	364	41.7619		Same Phylum	Omnitrophota
12	365	42.7188		Same Phylum	Omnitrophota
12	366	44.1412		Same Phylum	Omnitrophota
12	367	41.1		Same Phylum	Omnitrophota
12	368	48.5667		Same Phylum	Omnitrophota
12	369	41.5		Same Phylum	Omnitrophota
12	374	47.5444		Same Phylum	Omnitrophota
12	376	40.1875		Same Phylum	Omnitrophota
12	377	47.3048		Same Phylum	Omnitrophota
12	380	45.2889		Same Phylum	Omnitrophota
12	385	46.9125		Same Phylum	Omnitrophota
12	387	43.6286		Same Phylum	Omnitrophota
12	388	49.3429		Same Phylum	Omnitrophota
12	389	44.2		Same Phylum	Omnitrophota
12	390	51.275		Same Phylum	Omnitrophota
12	392	48.4357		Same Phylum	Omnitrophota
12	396	46.2433		Same Phylum	Omnitrophota
12	401	50.2333		Same Phylum	Omnitrophota
12	405	51.175		Same Phylum	Omnitrophota
12	406	50.275		Same Phylum	Omnitrophota
12	407	50.1667		Same Phylum	Omnitrophota
12	408	46.4917		Same Phylum	Omnitrophota
12	415	41.4583		Same Phylum	Omnitrophota
12	417	48.1955		Same Phylum	Omnitrophota
12	418	44.8611		Same Phylum	Omnitrophota
12	424	39.3		Same Domain
12	425	40.7		Same Domain
12	427	45.4		Same Domain
12	428	39.9		Same Domain
12	429	46.64		Same Domain
12	431	44.52		Same Domain
12	432	47.4333		Same Domain
12	433	37.3333		Same Domain
12	434	43.75		Same Domain
12	435	49.1		Same Domain
12	440	58.3		Same Domain
12	442	49.6333		Same Domain
12	444	55.6		Same Domain
12	445	41.0333		Same Domain
12	446	35.22		Same Domain
12	450	46.5875		Same Domain
13	1	51.7306		Same Order	2-02-FULL-51-18
13	2	53.3546		Same Order	2-02-FULL-51-18
13	5	51.3882		Same Order	2-02-FULL-51-18
13	12	52.2265		Same Order	2-02-FULL-51-18
13	13	100	100	Same Species	SAG-3300016432 sp. SAG-3300016432
13	15	47.45		Same Phylum	Omnitrophota
13	16	51.3866		Same Phylum	Omnitrophota
13	18	52.8258		Same Phylum	Omnitrophota
13	21	53.7419		Same Phylum	Omnitrophota
13	23	51.9722		Same Phylum	Omnitrophota
13	24	55.336		Same Phylum	Omnitrophota
13	25	50.12		Same Phylum	Omnitrophota
13	40	53.2143		Same Phylum	Omnitrophota
13	45	48.4692		Same Phylum	Omnitrophota
13	46	48.1125		Same Phylum	Omnitrophota
13	50	54.3		Same Phylum	Omnitrophota
13	53	50.15		Same Phylum	Omnitrophota
13	54	50.3781		Same Phylum	Omnitrophota
13	55	53.75		Same Phylum	Omnitrophota
13	57	42.1333		Same Phylum	Omnitrophota
13	58	43.6871		Same Phylum	Omnitrophota
13	59	52.9762		Same Phylum	Omnitrophota
13	60	51.204		Same Phylum	Omnitrophota
13	61	49.5417		Same Phylum	Omnitrophota
13	63	46.6667		Same Phylum	Omnitrophota
13	65	50.2875		Same Phylum	Omnitrophota
13	67	47.24		Same Phylum	Omnitrophota
13	69	51.8267		Same Phylum	Omnitrophota
13	70	54.8353		Same Phylum	Omnitrophota
13	71	45.3167		Same Phylum	Omnitrophota
13	72	42.7538		Same Phylum	Omnitrophota
13	74	45.96		Same Phylum	Omnitrophota
13	76	52.284		Same Phylum	Omnitrophota
13	80	50.5474		Same Phylum	Omnitrophota
13	84	50.7333		Same Phylum	Omnitrophota
13	85	48.013		Same Phylum	Omnitrophota
13	87	48.9406		Same Phylum	Omnitrophota
13	91	48.0407		Same Phylum	Omnitrophota
13	92	51.1938		Same Phylum	Omnitrophota
13	93	50.1458		Same Phylum	Omnitrophota
13	94	44.115		Same Phylum	Omnitrophota
13	95	47.0308		Same Phylum	Omnitrophota
13	96	44.6276		Same Phylum	Omnitrophota
13	100	52.4562		Same Phylum	Omnitrophota
13	101	45.2556		Same Phylum	Omnitrophota
13	103	49.5368		Same Phylum	Omnitrophota
13	104	45.6686		Same Phylum	Omnitrophota
13	107	49.655		Same Phylum	Omnitrophota
13	108	42.8529		Same Phylum	Omnitrophota
13	110	45.4833		Same Phylum	Omnitrophota
13	113	48.8875		Same Phylum	Omnitrophota
13	114	46.1591		Same Phylum	Omnitrophota
13	115	45.9846		Same Phylum	Omnitrophota
13	116	51.7		Same Phylum	Omnitrophota
13	131	49.22		Same Phylum	Omnitrophota
13	133	49.9		Same Phylum	Omnitrophota
13	136	48.0308		Same Phylum	Omnitrophota
13	140	49.5167		Same Phylum	Omnitrophota
13	144	49.255		Same Phylum	Omnitrophota
13	146	49.0987		Same Phylum	Omnitrophota
13	149	48.5649		Same Phylum	Omnitrophota
13	150	46.2385		Same Phylum	Omnitrophota
13	152	51.9396		Same Phylum	Omnitrophota
13	157	49.2408		Same Phylum	Omnitrophota
13	161	49.9542		Same Phylum	Omnitrophota
13	167	49.7375		Same Phylum	Omnitrophota
13	169	47.2982		Same Phylum	Omnitrophota
13	170	47.5717		Same Phylum	Omnitrophota
13	171	49.762		Same Phylum	Omnitrophota
13	174	48.1068		Same Phylum	Omnitrophota
13	175	49.1441		Same Phylum	Omnitrophota
13	177	46.6571		Same Phylum	Omnitrophota
13	178	52.5448		Same Phylum	Omnitrophota
13	179	52.6872		Same Phylum	Omnitrophota
13	183	47.3956		Same Phylum	Omnitrophota
13	186	49.0767		Same Phylum	Omnitrophota
13	189	47.0829		Same Phylum	Omnitrophota
13	190	49.615		Same Phylum	Omnitrophota
13	194	50.3714		Same Phylum	Omnitrophota
13	195	47.3204		Same Phylum	Omnitrophota
13	196	44.9434		Same Phylum	Omnitrophota
13	202	49.6758		Same Phylum	Omnitrophota
13	205	49.6167		Same Phylum	Omnitrophota
13	210	40.425		Same Phylum	Omnitrophota
13	211	47.0286		Same Phylum	Omnitrophota
13	213	44.3571		Same Phylum	Omnitrophota
13	214	45.6222		Same Phylum	Omnitrophota
13	215	42.1		Same Phylum	Omnitrophota
13	218	45.36		Same Phylum	Omnitrophota
13	221	37.4333		Same Phylum	Omnitrophota
13	223	37.4111		Same Phylum	Omnitrophota
13	224	45.604		Same Phylum	Omnitrophota
13	226	31.325		Same Phylum	Omnitrophota
13	227	36.85		Same Phylum	Omnitrophota
13	228	44.84		Same Phylum	Omnitrophota
13	229	32.9		Same Phylum	Omnitrophota
13	230	38.62		Same Phylum	Omnitrophota
13	231	35.5625		Same Phylum	Omnitrophota
13	233	36.8		Same Phylum	Omnitrophota
13	236	50.1167		Same Phylum	Omnitrophota
13	238	49.8		Same Phylum	Omnitrophota
13	240	49.6208		Same Phylum	Omnitrophota
13	241	47.3389		Same Phylum	Omnitrophota
13	247	50.4524		Same Phylum	Omnitrophota
13	249	47.1		Same Phylum	Omnitrophota
13	253	41.05		Same Phylum	Omnitrophota
13	258	45.5192		Same Phylum	Omnitrophota
13	259	48.1696		Same Phylum	Omnitrophota
13	260	46.14		Same Phylum	Omnitrophota
13	262	43.7609		Same Phylum	Omnitrophota
13	263	48.75		Same Phylum	Omnitrophota
13	264	51.31		Same Phylum	Omnitrophota
13	265	44.3222		Same Phylum	Omnitrophota
13	267	45.49		Same Phylum	Omnitrophota
13	269	48.0667		Same Phylum	Omnitrophota
13	272	45.2217		Same Phylum	Omnitrophota
13	273	45.2158		Same Phylum	Omnitrophota
13	277	45.2318		Same Phylum	Omnitrophota
13	280	45		Same Phylum	Omnitrophota
13	285	46.8789		Same Phylum	Omnitrophota
13	288	41.9308		Same Phylum	Omnitrophota
13	289	42.3621		Same Phylum	Omnitrophota
13	294	48.64		Same Phylum	Omnitrophota
13	295	46.8583		Same Phylum	Omnitrophota
13	297	41.19		Same Phylum	Omnitrophota
13	298	42.3471		Same Phylum	Omnitrophota
13	301	49.8294		Same Phylum	Omnitrophota
13	302	48.6		Same Phylum	Omnitrophota
13	304	49.9909		Same Phylum	Omnitrophota
13	305	56.0579		Same Phylum	Omnitrophota
13	306	45.2417		Same Phylum	Omnitrophota
13	307	47.7531		Same Phylum	Omnitrophota
13	308	47.2938		Same Phylum	Omnitrophota
13	309	47.6048		Same Phylum	Omnitrophota
13	310	51.3056		Same Phylum	Omnitrophota
13	314	39.3333		Same Phylum	Omnitrophota
13	315	40.0417		Same Phylum	Omnitrophota
13	317	36.9556		Same Phylum	Omnitrophota
13	318	46.6		Same Phylum	Omnitrophota
13	320	42.9		Same Phylum	Omnitrophota
13	321	42.1571		Same Phylum	Omnitrophota
13	325	34.9		Same Phylum	Omnitrophota
13	329	35.35		Same Phylum	Omnitrophota
13	330	49.8833		Same Phylum	Omnitrophota
13	331	61.35		Same Phylum	Omnitrophota
13	333	41.3875		Same Phylum	Omnitrophota
13	334	37.94		Same Phylum	Omnitrophota
13	336	39.2583		Same Phylum	Omnitrophota
13	337	53.16		Same Phylum	Omnitrophota
13	338	45.05		Same Phylum	Omnitrophota
13	340	47.6429		Same Phylum	Omnitrophota
13	341	43.9667		Same Phylum	Omnitrophota
13	342	43.55		Same Phylum	Omnitrophota
13	343	45.9333		Same Phylum	Omnitrophota
13	344	47.6		Same Phylum	Omnitrophota
13	346	48.75		Same Phylum	Omnitrophota
13	347	54.2714		Same Phylum	Omnitrophota
13	348	46.45		Same Phylum	Omnitrophota
13	349	33.9		Same Phylum	Omnitrophota
13	350	38.95		Same Phylum	Omnitrophota
13	359	24.75		Same Phylum	Omnitrophota
13	360	52.4		Same Phylum	Omnitrophota
13	362	38.5111		Same Phylum	Omnitrophota
13	363	39.12		Same Phylum	Omnitrophota
13	364	36.0667		Same Phylum	Omnitrophota
13	365	36.8412		Same Phylum	Omnitrophota
13	366	37.26		Same Phylum	Omnitrophota
13	367	43.775		Same Phylum	Omnitrophota
13	368	53.6833		Same Phylum	Omnitrophota
13	369	45.6875		Same Phylum	Omnitrophota
13	374	42.82		Same Phylum	Omnitrophota
13	376	41.9		Same Phylum	Omnitrophota
13	377	48.88		Same Phylum	Omnitrophota
13	380	46.3		Same Phylum	Omnitrophota
13	385	30		Same Phylum	Omnitrophota
13	387	49.5		Same Phylum	Omnitrophota
13	388	52.2667		Same Phylum	Omnitrophota
13	389	66.7		Same Phylum	Omnitrophota
13	390	50.7		Same Phylum	Omnitrophota
13	392	50.35		Same Phylum	Omnitrophota
13	396	40.9625		Same Phylum	Omnitrophota
13	401	39.5667		Same Phylum	Omnitrophota
13	405	56.92		Same Phylum	Omnitrophota
13	407	39.4		Same Phylum	Omnitrophota
13	408	44.5		Same Phylum	Omnitrophota
13	415	44.0143		Same Phylum	Omnitrophota
13	417	48.05		Same Phylum	Omnitrophota
13	418	41.9444		Same Phylum	Omnitrophota
13	424	56.6		Same Domain
13	425	57.75		Same Domain
13	427	50.15		Same Domain
13	428	53.2333		Same Domain
13	429	21.7		Same Domain
13	431	49.3333		Same Domain
13	432	28.1		Same Domain
13	433	48.5333		Same Domain
13	434	37.5		Same Domain
13	435	49.2		Same Domain
13	442	29.2		Same Domain
13	450	44.45		Same Domain
15	1	59.44		Same Phylum	Omnitrophota
15	2	54.4786		Same Phylum	Omnitrophota
15	5	52.7667		Same Phylum	Omnitrophota
15	12	50.7125		Same Phylum	Omnitrophota
15	13	47.45		Same Phylum	Omnitrophota
15	15	100	100	Same Species	B17-G2 sp003645805
15	16	56.0917		Same Phylum	Omnitrophota
15	18	50.425		Same Phylum	Omnitrophota
15	21	44.825		Same Phylum	Omnitrophota
15	23	41.8929		Same Phylum	Omnitrophota
15	24	53.2714		Same Phylum	Omnitrophota
15	25	43.25		Same Phylum	Omnitrophota
15	40	52.0556		Same Phylum	Omnitrophota
15	45	45.56		Same Phylum	Omnitrophota
15	46	45.3333		Same Phylum	Omnitrophota
15	50	44.9375		Same Phylum	Omnitrophota
15	53	39.6		Same Phylum	Omnitrophota
15	54	44.2769		Same Phylum	Omnitrophota
15	55	51.2		Same Phylum	Omnitrophota
15	57	49.5		Same Phylum	Omnitrophota
15	58	49.1195		Same Phylum	Omnitrophota
15	59	58.4056		Same Phylum	Omnitrophota
15	60	53.2238		Same Phylum	Omnitrophota
15	61	54.1828		Same Phylum	Omnitrophota
15	63	56.802		Same Phylum	Omnitrophota
15	65	55.8379		Same Phylum	Omnitrophota
15	67	51.4024		Same Phylum	Omnitrophota
15	69	51.968		Same Phylum	Omnitrophota
15	70	56.8474		Same Phylum	Omnitrophota
15	71	50.6729		Same Phylum	Omnitrophota
15	72	50.9948		Same Phylum	Omnitrophota
15	74	54.7808		Same Phylum	Omnitrophota
15	76	52.3211		Same Phylum	Omnitrophota
15	80	52.0364		Same Phylum	Omnitrophota
15	84	55.4773		Same Phylum	Omnitrophota
15	85	58.4324		Same Phylum	Omnitrophota
15	87	55.1		Same Phylum	Omnitrophota
15	91	56.3042		Same Phylum	Omnitrophota
15	92	53.4375		Same Phylum	Omnitrophota
15	93	52.3687		Same Phylum	Omnitrophota
15	94	58.9143		Same Phylum	Omnitrophota
15	95	55.764		Same Phylum	Omnitrophota
15	96	56.8513		Same Phylum	Omnitrophota
15	100	55.25		Same Phylum	Omnitrophota
15	101	59.1622		Same Phylum	Omnitrophota
15	103	57.4		Same Phylum	Omnitrophota
15	104	56.168		Same Phylum	Omnitrophota
15	107	57.1109		Same Phylum	Omnitrophota
15	108	54.5067		Same Phylum	Omnitrophota
15	110	50.6095		Same Phylum	Omnitrophota
15	113	53.91		Same Phylum	Omnitrophota
15	114	52.2867		Same Phylum	Omnitrophota
15	115	50.3818		Same Phylum	Omnitrophota
15	116	51.8667		Same Phylum	Omnitrophota
15	131	52.545		Same Phylum	Omnitrophota
15	133	48.8167		Same Phylum	Omnitrophota
15	136	47.2031		Same Phylum	Omnitrophota
15	140	49.831		Same Phylum	Omnitrophota
15	144	50.8		Same Phylum	Omnitrophota
15	146	50.1769		Same Phylum	Omnitrophota
15	149	47.08		Same Phylum	Omnitrophota
15	150	53.5423		Same Phylum	Omnitrophota
15	152	49.1846		Same Phylum	Omnitrophota
15	157	50.2727		Same Phylum	Omnitrophota
15	161	50.02		Same Phylum	Omnitrophota
15	167	52.4143		Same Phylum	Omnitrophota
15	169	42.58		Same Phylum	Omnitrophota
15	170	49.5		Same Phylum	Omnitrophota
15	171	52.05		Same Phylum	Omnitrophota
15	174	48.2778		Same Phylum	Omnitrophota
15	175	51.31		Same Phylum	Omnitrophota
15	177	58.2769		Same Phylum	Omnitrophota
15	178	50.61		Same Phylum	Omnitrophota
15	179	53.6417		Same Phylum	Omnitrophota
15	183	51.3464		Same Phylum	Omnitrophota
15	186	49.2857		Same Phylum	Omnitrophota
15	189	47.4083		Same Phylum	Omnitrophota
15	190	52.556		Same Phylum	Omnitrophota
15	194	40.38		Same Phylum	Omnitrophota
15	195	51.7176		Same Phylum	Omnitrophota
15	196	57.8222		Same Phylum	Omnitrophota
15	202	48.5591		Same Phylum	Omnitrophota
15	205	54.219		Same Phylum	Omnitrophota
15	210	52.0745		Same Phylum	Omnitrophota
15	211	52.8328		Same Phylum	Omnitrophota
15	213	52.8654		Same Phylum	Omnitrophota
15	214	56.5107		Same Phylum	Omnitrophota
15	215	54.7152		Same Phylum	Omnitrophota
15	218	54.8304		Same Phylum	Omnitrophota
15	221	49.8727		Same Phylum	Omnitrophota
15	223	49.2788		Same Phylum	Omnitrophota
15	224	47.4739		Same Phylum	Omnitrophota
15	226	52.7333		Same Phylum	Omnitrophota
15	227	56.8297		Same Phylum	Omnitrophota
15	228	56.8033		Same Phylum	Omnitrophota
15	229	47.6478		Same Phylum	Omnitrophota
15	230	49.4737		Same Phylum	Omnitrophota
15	231	53.8067		Same Phylum	Omnitrophota
15	233	54.3458		Same Phylum	Omnitrophota
15	236	52.082		Same Phylum	Omnitrophota
15	238	41.6571		Same Phylum	Omnitrophota
15	240	42.0875		Same Phylum	Omnitrophota
15	241	45.74		Same Phylum	Omnitrophota
15	247	51.9		Same Phylum	Omnitrophota
15	249	57.3		Same Phylum	Omnitrophota
15	253	43.51		Same Phylum	Omnitrophota
15	258	46.7375		Same Phylum	Omnitrophota
15	259	44.7632		Same Phylum	Omnitrophota
15	260	43.5857		Same Phylum	Omnitrophota
15	262	39.25		Same Phylum	Omnitrophota
15	263	40.2364		Same Phylum	Omnitrophota
15	264	51.2667		Same Phylum	Omnitrophota
15	265	41.92		Same Phylum	Omnitrophota
15	267	46.1		Same Phylum	Omnitrophota
15	269	46.7091		Same Phylum	Omnitrophota
15	272	47.8875		Same Phylum	Omnitrophota
15	273	48.9		Same Phylum	Omnitrophota
15	277	44.3778		Same Phylum	Omnitrophota
15	280	42.8714		Same Phylum	Omnitrophota
15	285	46.3875		Same Phylum	Omnitrophota
15	288	44.1333		Same Phylum	Omnitrophota
15	289	46		Same Phylum	Omnitrophota
15	294	49.2667		Same Phylum	Omnitrophota
15	295	42.8667		Same Phylum	Omnitrophota
15	297	52.9857		Same Phylum	Omnitrophota
15	298	40.3167		Same Phylum	Omnitrophota
15	301	38.675		Same Phylum	Omnitrophota
15	302	53.02		Same Phylum	Omnitrophota
15	304	46.84		Same Phylum	Omnitrophota
15	305	48.4333		Same Phylum	Omnitrophota
15	306	34.7		Same Phylum	Omnitrophota
15	307	29.2		Same Phylum	Omnitrophota
15	308	53.9		Same Phylum	Omnitrophota
15	309	45.86		Same Phylum	Omnitrophota
15	310	27.8		Same Phylum	Omnitrophota
15	314	49.8818		Same Phylum	Omnitrophota
15	315	43.6238		Same Phylum	Omnitrophota
15	317	48.5966		Same Phylum	Omnitrophota
15	318	46.24		Same Phylum	Omnitrophota
15	320	51.2154		Same Phylum	Omnitrophota
15	321	50.92		Same Phylum	Omnitrophota
15	325	47.6333		Same Phylum	Omnitrophota
15	329	50.7143		Same Phylum	Omnitrophota
15	330	54.3846		Same Phylum	Omnitrophota
15	331	47.1533		Same Phylum	Omnitrophota
15	333	43.5		Same Phylum	Omnitrophota
15	334	47.325		Same Phylum	Omnitrophota
15	336	53.8806		Same Phylum	Omnitrophota
15	337	60.7667		Same Phylum	Omnitrophota
15	338	55.475		Same Phylum	Omnitrophota
15	340	55.9818		Same Phylum	Omnitrophota
15	341	54.4158		Same Phylum	Omnitrophota
15	342	50.0667		Same Phylum	Omnitrophota
15	343	36.94		Same Phylum	Omnitrophota
15	344	50.9118		Same Phylum	Omnitrophota
15	345	57.55		Same Phylum	Omnitrophota
15	346	41.45		Same Phylum	Omnitrophota
15	347	49.75		Same Phylum	Omnitrophota
15	348	51.7615		Same Phylum	Omnitrophota
15	349	59.54		Same Phylum	Omnitrophota
15	350	45.625		Same Phylum	Omnitrophota
15	359	48.9375		Same Phylum	Omnitrophota
15	360	49.575		Same Phylum	Omnitrophota
15	361	58.65		Same Phylum	Omnitrophota
15	362	58.3905		Same Phylum	Omnitrophota
15	363	63.7286		Same Phylum	Omnitrophota
15	364	44.08		Same Phylum	Omnitrophota
15	365	46.29		Same Phylum	Omnitrophota
15	366	49.7263		Same Phylum	Omnitrophota
15	367	52.3105		Same Phylum	Omnitrophota
15	368	66.1214		Same Phylum	Omnitrophota
15	369	49.8545		Same Phylum	Omnitrophota
15	374	49.0692		Same Phylum	Omnitrophota
15	376	59.55		Same Phylum	Omnitrophota
15	377	46.18		Same Phylum	Omnitrophota
15	380	51.99		Same Phylum	Omnitrophota
15	385	48.2		Same Phylum	Omnitrophota
15	387	49.6909		Same Phylum	Omnitrophota
15	388	44.28		Same Phylum	Omnitrophota
15	389	38.85		Same Phylum	Omnitrophota
15	390	48.272		Same Phylum	Omnitrophota
15	392	49.6083		Same Phylum	Omnitrophota
15	396	44.1389		Same Phylum	Omnitrophota
15	401	45.575		Same Phylum	Omnitrophota
15	405	47.0933		Same Phylum	Omnitrophota
15	406	51.3		Same Phylum	Omnitrophota
15	407	52.85		Same Phylum	Omnitrophota
15	408	47.3133		Same Phylum	Omnitrophota
15	415	47.6619		Same Phylum	Omnitrophota
15	417	47.32		Same Phylum	Omnitrophota
15	418	53.5		Same Phylum	Omnitrophota
15	424	53.1393		Same Domain
15	425	53.864		Same Domain
15	427	52.92		Same Domain
15	428	54.2148		Same Domain
15	429	54.9929		Same Domain
15	431	53.4548		Same Domain
15	432	57.7125		Same Domain
15	433	56.2146		Same Domain
15	434	58.4067		Same Domain
15	435	53.9905		Same Domain
15	440	53.0875		Same Domain
15	442	55.7		Same Domain
15	444	55.5056		Same Domain
15	445	52.6		Same Domain
15	446	57.2571		Same Domain
15	450	53.9782		Same Domain
16	1	52.3449		Same Phylum	Omnitrophota
16	2	51.6895		Same Phylum	Omnitrophota
16	5	52.0119		Same Phylum	Omnitrophota
16	12	52.5979		Same Phylum	Omnitrophota
16	13	51.4881		Same Phylum	Omnitrophota
16	15	56.1667		Same Phylum	Omnitrophota
16	16	100	100	Same Species	1-14-0-20-64-10 sp002787095
16	18	60.1625		Same Family	1-14-0-20-64-10
16	21	59.3935		Same Family	1-14-0-20-64-10
16	23	56.3163		Same Order	1-14-0-20-64-10
16	24	54.0418		Same Class	Aquiviventia
16	25	53.8593		Same Class	Aquiviventia
16	40	53.4741		Same Class	Aquiviventia
16	45	53.1203		Same Class	Aquiviventia
16	46	52.8286		Same Class	Aquiviventia
16	50	52.9184		Same Class	Aquiviventia
16	53	53.286		Same Class	Aquiviventia
16	54	53.0799		Same Class	Aquiviventia
16	55	53.1918		Same Class	Aquiviventia
16	57	48.26		Same Phylum	Omnitrophota
16	58	51.3868		Same Phylum	Omnitrophota
16	59	54.367		Same Phylum	Omnitrophota
16	60	52.7559		Same Phylum	Omnitrophota
16	61	49.5412		Same Phylum	Omnitrophota
16	63	45.1032		Same Phylum	Omnitrophota
16	65	50.5967		Same Phylum	Omnitrophota
16	67	44.668		Same Phylum	Omnitrophota
16	69	46.3273		Same Phylum	Omnitrophota
16	70	44.9537		Same Phylum	Omnitrophota
16	71	47.9604		Same Phylum	Omnitrophota
16	72	51.7345		Same Phylum	Omnitrophota
16	74	46.7741		Same Phylum	Omnitrophota
16	76	49.032		Same Phylum	Omnitrophota
16	80	51.1476		Same Phylum	Omnitrophota
16	84	47.2156		Same Phylum	Omnitrophota
16	85	46.085		Same Phylum	Omnitrophota
16	87	49.8077		Same Phylum	Omnitrophota
16	91	46.1531		Same Phylum	Omnitrophota
16	92	50.5615		Same Phylum	Omnitrophota
16	93	47.0042		Same Phylum	Omnitrophota
16	94	48.6765		Same Phylum	Omnitrophota
16	95	50.3647		Same Phylum	Omnitrophota
16	96	49.2		Same Phylum	Omnitrophota
16	100	48.3188		Same Phylum	Omnitrophota
16	101	51		Same Phylum	Omnitrophota
16	103	47.4238		Same Phylum	Omnitrophota
16	104	49.4467		Same Phylum	Omnitrophota
16	107	46.8333		Same Phylum	Omnitrophota
16	108	44.1861		Same Phylum	Omnitrophota
16	110	55.3351		Same Phylum	Omnitrophota
16	113	54.9731		Same Phylum	Omnitrophota
16	114	55.1424		Same Phylum	Omnitrophota
16	115	55.1442		Same Phylum	Omnitrophota
16	116	48.2803		Same Phylum	Omnitrophota
16	131	48.5308		Same Phylum	Omnitrophota
16	133	49.7478		Same Phylum	Omnitrophota
16	136	50.3243		Same Phylum	Omnitrophota
16	140	46.7654		Same Phylum	Omnitrophota
16	144	47.4463		Same Phylum	Omnitrophota
16	146	51.5367		Same Phylum	Omnitrophota
16	149	52.1727		Same Phylum	Omnitrophota
16	150	50.4337		Same Phylum	Omnitrophota
16	152	51.64		Same Phylum	Omnitrophota
16	157	50.664		Same Phylum	Omnitrophota
16	161	52.4444		Same Phylum	Omnitrophota
16	167	53.6846		Same Phylum	Omnitrophota
16	169	50.7938		Same Phylum	Omnitrophota
16	170	51.3889		Same Phylum	Omnitrophota
16	171	51.472		Same Phylum	Omnitrophota
16	174	49.015		Same Phylum	Omnitrophota
16	175	51.3019		Same Phylum	Omnitrophota
16	177	49.7393		Same Phylum	Omnitrophota
16	178	50.5256		Same Phylum	Omnitrophota
16	179	49.9795		Same Phylum	Omnitrophota
16	183	48.8921		Same Phylum	Omnitrophota
16	186	51.4512		Same Phylum	Omnitrophota
16	189	49.2547		Same Phylum	Omnitrophota
16	190	51.5236		Same Phylum	Omnitrophota
16	194	50.8162		Same Phylum	Omnitrophota
16	195	48.4773		Same Phylum	Omnitrophota
16	196	49.5636		Same Phylum	Omnitrophota
16	202	53.1183		Same Phylum	Omnitrophota
16	205	50.7417		Same Phylum	Omnitrophota
16	210	52.24		Same Phylum	Omnitrophota
16	211	52.6579		Same Phylum	Omnitrophota
16	213	51.5174		Same Phylum	Omnitrophota
16	214	50.9682		Same Phylum	Omnitrophota
16	215	50.7667		Same Phylum	Omnitrophota
16	218	52.3625		Same Phylum	Omnitrophota
16	221	40.4		Same Phylum	Omnitrophota
16	223	44.0571		Same Phylum	Omnitrophota
16	224	49.63		Same Phylum	Omnitrophota
16	226	43.9222		Same Phylum	Omnitrophota
16	227	52.0833		Same Phylum	Omnitrophota
16	228	37.3		Same Phylum	Omnitrophota
16	229	38.7636		Same Phylum	Omnitrophota
16	230	44.3625		Same Phylum	Omnitrophota
16	231	46.6818		Same Phylum	Omnitrophota
16	233	44.8		Same Phylum	Omnitrophota
16	236	49.2875		Same Phylum	Omnitrophota
16	238	49.9562		Same Phylum	Omnitrophota
16	240	49.9484		Same Phylum	Omnitrophota
16	241	50.2719		Same Phylum	Omnitrophota
16	247	49.2714		Same Phylum	Omnitrophota
16	249	45.7952		Same Phylum	Omnitrophota
16	253	42.7138		Same Phylum	Omnitrophota
16	258	49.0769		Same Phylum	Omnitrophota
16	259	48.35		Same Phylum	Omnitrophota
16	260	50.803		Same Phylum	Omnitrophota
16	262	45.3375		Same Phylum	Omnitrophota
16	263	52.4643		Same Phylum	Omnitrophota
16	264	48.8619		Same Phylum	Omnitrophota
16	265	51		Same Phylum	Omnitrophota
16	267	51.1067		Same Phylum	Omnitrophota
16	269	49.605		Same Phylum	Omnitrophota
16	272	49.6692		Same Phylum	Omnitrophota
16	273	49.0947		Same Phylum	Omnitrophota
16	277	48.6524		Same Phylum	Omnitrophota
16	280	50.935		Same Phylum	Omnitrophota
16	285	48.1971		Same Phylum	Omnitrophota
16	288	45.58		Same Phylum	Omnitrophota
16	289	45.4077		Same Phylum	Omnitrophota
16	294	45.27		Same Phylum	Omnitrophota
16	295	49.7222		Same Phylum	Omnitrophota
16	297	48.5828		Same Phylum	Omnitrophota
16	298	50.7812		Same Phylum	Omnitrophota
16	301	48.3433		Same Phylum	Omnitrophota
16	302	49.175		Same Phylum	Omnitrophota
16	304	45.8023		Same Phylum	Omnitrophota
16	305	51.87		Same Phylum	Omnitrophota
16	306	50.0516		Same Phylum	Omnitrophota
16	307	52.4161		Same Phylum	Omnitrophota
16	308	49.112		Same Phylum	Omnitrophota
16	309	50.5977		Same Phylum	Omnitrophota
16	310	50.4815		Same Phylum	Omnitrophota
16	314	49.2867		Same Phylum	Omnitrophota
16	315	41.4786		Same Phylum	Omnitrophota
16	317	47.631		Same Phylum	Omnitrophota
16	318	48.6091		Same Phylum	Omnitrophota
16	320	55.46		Same Phylum	Omnitrophota
16	321	42.7214		Same Phylum	Omnitrophota
16	325	54.8143		Same Phylum	Omnitrophota
16	329	39.8333		Same Phylum	Omnitrophota
16	330	50.2455		Same Phylum	Omnitrophota
16	331	45.925		Same Phylum	Omnitrophota
16	333	37.8		Same Phylum	Omnitrophota
16	334	45.35		Same Phylum	Omnitrophota
16	336	39.2588		Same Phylum	Omnitrophota
16	337	45.1667		Same Phylum	Omnitrophota
16	338	51.0167		Same Phylum	Omnitrophota
16	340	45.0867		Same Phylum	Omnitrophota
16	341	50.5867		Same Phylum	Omnitrophota
16	342	39.1778		Same Phylum	Omnitrophota
16	343	46.2333		Same Phylum	Omnitrophota
16	344	50.6938		Same Phylum	Omnitrophota
16	345	47.4667		Same Phylum	Omnitrophota
16	346	41.375		Same Phylum	Omnitrophota
16	347	45.85		Same Phylum	Omnitrophota
16	348	38.324		Same Phylum	Omnitrophota
16	349	49.6		Same Phylum	Omnitrophota
16	350	39.2045		Same Phylum	Omnitrophota
16	359	38.0625		Same Phylum	Omnitrophota
16	360	39.5667		Same Phylum	Omnitrophota
16	361	33.95		Same Phylum	Omnitrophota
16	362	45.2786		Same Phylum	Omnitrophota
16	363	46.1778		Same Phylum	Omnitrophota
16	364	44.1938		Same Phylum	Omnitrophota
16	365	46.8692		Same Phylum	Omnitrophota
16	366	46.8615		Same Phylum	Omnitrophota
16	367	47.9125		Same Phylum	Omnitrophota
16	368	41		Same Phylum	Omnitrophota
16	369	51.1875		Same Phylum	Omnitrophota
16	374	50.7235		Same Phylum	Omnitrophota
16	376	36.9286		Same Phylum	Omnitrophota
16	377	47.6722		Same Phylum	Omnitrophota
16	380	46.2588		Same Phylum	Omnitrophota
16	385	36.78		Same Phylum	Omnitrophota
16	387	37.42		Same Phylum	Omnitrophota
16	388	42.14		Same Phylum	Omnitrophota
16	389	53.1		Same Phylum	Omnitrophota
16	390	48.1857		Same Phylum	Omnitrophota
16	392	51.6625		Same Phylum	Omnitrophota
16	396	43.2622		Same Phylum	Omnitrophota
16	401	39.1053		Same Phylum	Omnitrophota
16	405	47.6417		Same Phylum	Omnitrophota
16	406	39.19		Same Phylum	Omnitrophota
16	407	51.75		Same Phylum	Omnitrophota
16	408	48.8		Same Phylum	Omnitrophota
16	415	51.7786		Same Phylum	Omnitrophota
16	417	53.7947		Same Phylum	Omnitrophota
16	418	54.56		Same Phylum	Omnitrophota
16	424	48.06		Same Domain
16	425	44.5667		Same Domain
16	427	45.0833		Same Domain
16	428	43.27		Same Domain
16	429	40.0125		Same Domain
16	431	42.41		Same Domain
16	432	45.2625		Same Domain
16	433	45.98		Same Domain
16	434	44.78		Same Domain
16	435	44.7		Same Domain
16	440	44.75		Same Domain
16	442	47.6167		Same Domain
16	444	46.5		Same Domain
16	445	42.77		Same Domain
16	446	56.4		Same Domain
16	450	47.4737		Same Domain
18	1	54.1048		Same Phylum	Omnitrophota
18	2	56.558		Same Phylum	Omnitrophota
18	5	55.0543		Same Phylum	Omnitrophota
18	12	54.6933		Same Phylum	Omnitrophota
18	13	52.7194		Same Phylum	Omnitrophota
18	15	50.425		Same Phylum	Omnitrophota
18	16	60.1026		Same Family	1-14-0-20-64-10
18	18	100	100	Same Species	JZ-2-99-201901 sp. IMG-2713897464
18	21	63.4315		Same Genus	JZ-2-99-201901
18	23	58.1178		Same Order	1-14-0-20-64-10
18	24	55.6221		Same Class	Aquiviventia
18	25	54.7844		Same Class	Aquiviventia
18	40	55.2403		Same Class	Aquiviventia
18	45	54.9468		Same Class	Aquiviventia
18	46	54.6748		Same Class	Aquiviventia
18	50	55.1829		Same Class	Aquiviventia
18	53	55.2386		Same Class	Aquiviventia
18	54	53.2138		Same Class	Aquiviventia
18	55	54.3176		Same Class	Aquiviventia
18	57	51.75		Same Phylum	Omnitrophota
18	58	49.54		Same Phylum	Omnitrophota
18	59	56.7457		Same Phylum	Omnitrophota
18	60	53.5467		Same Phylum	Omnitrophota
18	61	55.0211		Same Phylum	Omnitrophota
18	63	47.3082		Same Phylum	Omnitrophota
18	65	48.6793		Same Phylum	Omnitrophota
18	67	47.7064		Same Phylum	Omnitrophota
18	69	49.5581		Same Phylum	Omnitrophota
18	70	48.1756		Same Phylum	Omnitrophota
18	71	50.339		Same Phylum	Omnitrophota
18	72	51.7259		Same Phylum	Omnitrophota
18	74	43.9179		Same Phylum	Omnitrophota
18	76	48.5568		Same Phylum	Omnitrophota
18	80	51.6229		Same Phylum	Omnitrophota
18	84	51.68		Same Phylum	Omnitrophota
18	85	50.3647		Same Phylum	Omnitrophota
18	87	48.671		Same Phylum	Omnitrophota
18	91	49.6325		Same Phylum	Omnitrophota
18	92	49.75		Same Phylum	Omnitrophota
18	93	43.1522		Same Phylum	Omnitrophota
18	94	40.3571		Same Phylum	Omnitrophota
18	95	48.6118		Same Phylum	Omnitrophota
18	96	48.0846		Same Phylum	Omnitrophota
18	100	44.7333		Same Phylum	Omnitrophota
18	101	43.5941		Same Phylum	Omnitrophota
18	103	49.16		Same Phylum	Omnitrophota
18	104	43.1		Same Phylum	Omnitrophota
18	107	51.2545		Same Phylum	Omnitrophota
18	108	41.9368		Same Phylum	Omnitrophota
18	110	54.3602		Same Phylum	Omnitrophota
18	113	54.9124		Same Phylum	Omnitrophota
18	114	54.5408		Same Phylum	Omnitrophota
18	115	54.1515		Same Phylum	Omnitrophota
18	116	52.0877		Same Phylum	Omnitrophota
18	131	52.9967		Same Phylum	Omnitrophota
18	133	49.0269		Same Phylum	Omnitrophota
18	136	50.825		Same Phylum	Omnitrophota
18	140	45.5048		Same Phylum	Omnitrophota
18	144	47.3375		Same Phylum	Omnitrophota
18	146	54.2086		Same Phylum	Omnitrophota
18	149	56.0889		Same Phylum	Omnitrophota
18	150	52.4512		Same Phylum	Omnitrophota
18	152	51.4182		Same Phylum	Omnitrophota
18	157	53.4958		Same Phylum	Omnitrophota
18	161	51.95		Same Phylum	Omnitrophota
18	167	56.8615		Same Phylum	Omnitrophota
18	169	53.5955		Same Phylum	Omnitrophota
18	170	57.2667		Same Phylum	Omnitrophota
18	171	56.3806		Same Phylum	Omnitrophota
18	174	40.8571		Same Phylum	Omnitrophota
18	175	50.3538		Same Phylum	Omnitrophota
18	177	53.89		Same Phylum	Omnitrophota
18	178	51.5933		Same Phylum	Omnitrophota
18	179	50.5647		Same Phylum	Omnitrophota
18	183	49.034		Same Phylum	Omnitrophota
18	186	58.2441		Same Phylum	Omnitrophota
18	189	51.3564		Same Phylum	Omnitrophota
18	190	52.888		Same Phylum	Omnitrophota
18	194	52.4023		Same Phylum	Omnitrophota
18	195	53.7034		Same Phylum	Omnitrophota
18	196	53.0513		Same Phylum	Omnitrophota
18	202	52.5116		Same Phylum	Omnitrophota
18	205	57.225		Same Phylum	Omnitrophota
18	210	51.7576		Same Phylum	Omnitrophota
18	211	51.8333		Same Phylum	Omnitrophota
18	213	50.8889		Same Phylum	Omnitrophota
18	214	54.2133		Same Phylum	Omnitrophota
18	215	38.725		Same Phylum	Omnitrophota
18	218	46.8143		Same Phylum	Omnitrophota
18	221	37.95		Same Phylum	Omnitrophota
18	223	41.9		Same Phylum	Omnitrophota
18	224	43.2263		Same Phylum	Omnitrophota
18	226	35.9143		Same Phylum	Omnitrophota
18	227	48.1667		Same Phylum	Omnitrophota
18	228	42.4		Same Phylum	Omnitrophota
18	229	47.7714		Same Phylum	Omnitrophota
18	230	44.4333		Same Phylum	Omnitrophota
18	231	48.7125		Same Phylum	Omnitrophota
18	233	39.95		Same Phylum	Omnitrophota
18	236	56.5714		Same Phylum	Omnitrophota
18	238	43.3143		Same Phylum	Omnitrophota
18	240	54.1417		Same Phylum	Omnitrophota
18	241	50.0077		Same Phylum	Omnitrophota
18	247	48.0273		Same Phylum	Omnitrophota
18	249	43.9		Same Phylum	Omnitrophota
18	253	47.7		Same Phylum	Omnitrophota
18	258	48.7429		Same Phylum	Omnitrophota
18	259	51.2146		Same Phylum	Omnitrophota
18	260	45.7172		Same Phylum	Omnitrophota
18	262	46.3615		Same Phylum	Omnitrophota
18	263	51.1647		Same Phylum	Omnitrophota
18	264	50.5387		Same Phylum	Omnitrophota
18	265	49.925		Same Phylum	Omnitrophota
18	267	48.7733		Same Phylum	Omnitrophota
18	269	49.4294		Same Phylum	Omnitrophota
18	272	49.52		Same Phylum	Omnitrophota
18	273	49.5667		Same Phylum	Omnitrophota
18	277	49.2286		Same Phylum	Omnitrophota
18	280	51.6667		Same Phylum	Omnitrophota
18	285	45.2727		Same Phylum	Omnitrophota
18	288	36.675		Same Phylum	Omnitrophota
18	289	49.44		Same Phylum	Omnitrophota
18	294	39.8333		Same Phylum	Omnitrophota
18	295	52.86		Same Phylum	Omnitrophota
18	297	43.6615		Same Phylum	Omnitrophota
18	298	46		Same Phylum	Omnitrophota
18	301	47.0318		Same Phylum	Omnitrophota
18	302	32.3		Same Phylum	Omnitrophota
18	304	47.4609		Same Phylum	Omnitrophota
18	305	56.6348		Same Phylum	Omnitrophota
18	306	48.8312		Same Phylum	Omnitrophota
18	307	52.7737		Same Phylum	Omnitrophota
18	308	51.3941		Same Phylum	Omnitrophota
18	309	52.62		Same Phylum	Omnitrophota
18	310	52.65		Same Phylum	Omnitrophota
18	314	47.3522		Same Phylum	Omnitrophota
18	315	47.95		Same Phylum	Omnitrophota
18	317	42.7385		Same Phylum	Omnitrophota
18	318	46		Same Phylum	Omnitrophota
18	320	58.475		Same Phylum	Omnitrophota
18	321	40.62		Same Phylum	Omnitrophota
18	325	53.2		Same Phylum	Omnitrophota
18	329	42.825		Same Phylum	Omnitrophota
18	330	46.5333		Same Phylum	Omnitrophota
18	331	53.38		Same Phylum	Omnitrophota
18	333	36.95		Same Phylum	Omnitrophota
18	334	61.3		Same Phylum	Omnitrophota
18	336	42.63		Same Phylum	Omnitrophota
18	337	41.1		Same Phylum	Omnitrophota
18	338	41.0167		Same Phylum	Omnitrophota
18	340	57.9333		Same Phylum	Omnitrophota
18	341	46.8889		Same Phylum	Omnitrophota
18	342	46.8429		Same Phylum	Omnitrophota
18	343	41.4		Same Phylum	Omnitrophota
18	344	43.675		Same Phylum	Omnitrophota
18	345	41.2		Same Phylum	Omnitrophota
18	346	46.4667		Same Phylum	Omnitrophota
18	347	42.9		Same Phylum	Omnitrophota
18	348	49.87		Same Phylum	Omnitrophota
18	349	51.5545		Same Phylum	Omnitrophota
18	350	40.6308		Same Phylum	Omnitrophota
18	359	46.1		Same Phylum	Omnitrophota
18	360	48.6		Same Phylum	Omnitrophota
18	361	32.1		Same Phylum	Omnitrophota
18	362	56.0857		Same Phylum	Omnitrophota
18	363	47.68		Same Phylum	Omnitrophota
18	364	43.8733		Same Phylum	Omnitrophota
18	365	39.75		Same Phylum	Omnitrophota
18	366	43.5545		Same Phylum	Omnitrophota
18	367	44.44		Same Phylum	Omnitrophota
18	368	40.4		Same Phylum	Omnitrophota
18	369	46.5222		Same Phylum	Omnitrophota
18	374	44.7		Same Phylum	Omnitrophota
18	376	45.1667		Same Phylum	Omnitrophota
18	377	49.6		Same Phylum	Omnitrophota
18	380	63.84		Same Phylum	Omnitrophota
18	385	48.8125		Same Phylum	Omnitrophota
18	387	43.0273		Same Phylum	Omnitrophota
18	388	50.8286		Same Phylum	Omnitrophota
18	389	40.8167		Same Phylum	Omnitrophota
18	390	48.0952		Same Phylum	Omnitrophota
18	392	45.3211		Same Phylum	Omnitrophota
18	396	44.7435		Same Phylum	Omnitrophota
18	401	45.0148		Same Phylum	Omnitrophota
18	405	45.3893		Same Phylum	Omnitrophota
18	406	46.6818		Same Phylum	Omnitrophota
18	407	55.1167		Same Phylum	Omnitrophota
18	408	52.9467		Same Phylum	Omnitrophota
18	415	48.7467		Same Phylum	Omnitrophota
18	417	49.3375		Same Phylum	Omnitrophota
18	418	48.4125		Same Phylum	Omnitrophota
18	424	46.5571		Same Domain
18	425	48.45		Same Domain
18	427	48.6625		Same Domain
18	428	47.95		Same Domain
18	429	54.45		Same Domain
18	431	44.18		Same Domain
18	433	52.0222		Same Domain
18	434	43.4		Same Domain
18	435	43.6333		Same Domain
18	440	48.3		Same Domain
18	442	46.85		Same Domain
18	444	42.55		Same Domain
18	445	39.38		Same Domain
18	446	46.6		Same Domain
18	450	52.5538		Same Domain
21	1	51.9864		Same Phylum	Omnitrophota
21	2	54.7132		Same Phylum	Omnitrophota
21	5	53.8543		Same Phylum	Omnitrophota
21	12	52.5662		Same Phylum	Omnitrophota
21	13	53.7871		Same Phylum	Omnitrophota
21	15	44.75		Same Phylum	Omnitrophota
21	16	59.4124		Same Family	1-14-0-20-64-10
21	18	63.5945		Same Genus	JZ-2-99-201901
21	21	100	100	Same Species	JZ-2-99-201901 sp. JZ-2-99-201901
21	23	56.9727		Same Order	1-14-0-20-64-10
21	24	53.6915		Same Class	Aquiviventia
21	25	51.7577		Same Class	Aquiviventia
21	40	53.6337		Same Class	Aquiviventia
21	45	50.6278		Same Class	Aquiviventia
21	46	53.4611		Same Class	Aquiviventia
21	50	52.6702		Same Class	Aquiviventia
21	53	51.4739		Same Class	Aquiviventia
21	54	51.5006		Same Class	Aquiviventia
21	55	53.5242		Same Class	Aquiviventia
21	57	45.6333		Same Phylum	Omnitrophota
21	58	48.8214		Same Phylum	Omnitrophota
21	59	53.9987		Same Phylum	Omnitrophota
21	60	52.1217		Same Phylum	Omnitrophota
21	61	48.5063		Same Phylum	Omnitrophota
21	63	49.3085		Same Phylum	Omnitrophota
21	65	48.9		Same Phylum	Omnitrophota
21	67	51.7359		Same Phylum	Omnitrophota
21	69	51.35		Same Phylum	Omnitrophota
21	70	52.4059		Same Phylum	Omnitrophota
21	71	50.8703		Same Phylum	Omnitrophota
21	72	52.4759		Same Phylum	Omnitrophota
21	74	47.788		Same Phylum	Omnitrophota
21	76	51.5842		Same Phylum	Omnitrophota
21	80	53.12		Same Phylum	Omnitrophota
21	84	52.7645		Same Phylum	Omnitrophota
21	85	53.9815		Same Phylum	Omnitrophota
21	87	50.2609		Same Phylum	Omnitrophota
21	91	49.2833		Same Phylum	Omnitrophota
21	92	51.075		Same Phylum	Omnitrophota
21	93	46.78		Same Phylum	Omnitrophota
21	94	45.8167		Same Phylum	Omnitrophota
21	95	43.9357		Same Phylum	Omnitrophota
21	96	45.1692		Same Phylum	Omnitrophota
21	100	47.48		Same Phylum	Omnitrophota
21	101	48.9		Same Phylum	Omnitrophota
21	103	44.6		Same Phylum	Omnitrophota
21	104	40.5545		Same Phylum	Omnitrophota
21	107	52.4417		Same Phylum	Omnitrophota
21	108	43.3647		Same Phylum	Omnitrophota
21	110	52.5942		Same Phylum	Omnitrophota
21	113	53.4293		Same Phylum	Omnitrophota
21	114	54.5926		Same Phylum	Omnitrophota
21	115	53.2878		Same Phylum	Omnitrophota
21	116	51.7208		Same Phylum	Omnitrophota
21	131	51.7941		Same Phylum	Omnitrophota
21	133	48.685		Same Phylum	Omnitrophota
21	136	49.7769		Same Phylum	Omnitrophota
21	140	47.7783		Same Phylum	Omnitrophota
21	144	50.5806		Same Phylum	Omnitrophota
21	146	53.6044		Same Phylum	Omnitrophota
21	149	52.6973		Same Phylum	Omnitrophota
21	150	53.6847		Same Phylum	Omnitrophota
21	152	51.4087		Same Phylum	Omnitrophota
21	157	55.7519		Same Phylum	Omnitrophota
21	161	52.5862		Same Phylum	Omnitrophota
21	167	58.375		Same Phylum	Omnitrophota
21	169	54.32		Same Phylum	Omnitrophota
21	170	50.1526		Same Phylum	Omnitrophota
21	171	59.2818		Same Phylum	Omnitrophota
21	174	55.8045		Same Phylum	Omnitrophota
21	175	54.4273		Same Phylum	Omnitrophota
21	177	54.5808		Same Phylum	Omnitrophota
21	178	55.3154		Same Phylum	Omnitrophota
21	179	52.6545		Same Phylum	Omnitrophota
21	183	50.0407		Same Phylum	Omnitrophota
21	186	51.1417		Same Phylum	Omnitrophota
21	189	49.927		Same Phylum	Omnitrophota
21	190	49.6983		Same Phylum	Omnitrophota
21	194	56.8		Same Phylum	Omnitrophota
21	195	49.0129		Same Phylum	Omnitrophota
21	196	56.1643		Same Phylum	Omnitrophota
21	202	52.6423		Same Phylum	Omnitrophota
21	205	53.5812		Same Phylum	Omnitrophota
21	210	57.7071		Same Phylum	Omnitrophota
21	211	60.1944		Same Phylum	Omnitrophota
21	213	55.7474		Same Phylum	Omnitrophota
21	214	52.6964		Same Phylum	Omnitrophota
21	215	37.9		Same Phylum	Omnitrophota
21	218	47.2909		Same Phylum	Omnitrophota
21	221	56.325		Same Phylum	Omnitrophota
21	223	43.9632		Same Phylum	Omnitrophota
21	224	41.9444		Same Phylum	Omnitrophota
21	226	44.46		Same Phylum	Omnitrophota
21	227	43.4867		Same Phylum	Omnitrophota
21	228	39.0429		Same Phylum	Omnitrophota
21	229	43.15		Same Phylum	Omnitrophota
21	230	38.3667		Same Phylum	Omnitrophota
21	231	50.1278		Same Phylum	Omnitrophota
21	233	43.51		Same Phylum	Omnitrophota
21	236	43.7		Same Phylum	Omnitrophota
21	238	46.2714		Same Phylum	Omnitrophota
21	240	47.0167		Same Phylum	Omnitrophota
21	241	46.0636		Same Phylum	Omnitrophota
21	247	49.1909		Same Phylum	Omnitrophota
21	249	33.7875		Same Phylum	Omnitrophota
21	253	40.0308		Same Phylum	Omnitrophota
21	258	50.5043		Same Phylum	Omnitrophota
21	259	48.2422		Same Phylum	Omnitrophota
21	260	45.3171		Same Phylum	Omnitrophota
21	262	39.1737		Same Phylum	Omnitrophota
21	263	46.3846		Same Phylum	Omnitrophota
21	264	54.2692		Same Phylum	Omnitrophota
21	265	42.2833		Same Phylum	Omnitrophota
21	267	42.2852		Same Phylum	Omnitrophota
21	269	48.6231		Same Phylum	Omnitrophota
21	272	48.0038		Same Phylum	Omnitrophota
21	273	39.5		Same Phylum	Omnitrophota
21	277	41.4818		Same Phylum	Omnitrophota
21	280	41.57		Same Phylum	Omnitrophota
21	285	40.6111		Same Phylum	Omnitrophota
21	288	42.35		Same Phylum	Omnitrophota
21	289	46.0857		Same Phylum	Omnitrophota
21	294	36.6167		Same Phylum	Omnitrophota
21	295	36.0833		Same Phylum	Omnitrophota
21	297	44.3583		Same Phylum	Omnitrophota
21	298	44.7		Same Phylum	Omnitrophota
21	301	45.8263		Same Phylum	Omnitrophota
21	302	28.3		Same Phylum	Omnitrophota
21	304	49.1313		Same Phylum	Omnitrophota
21	305	58.9688		Same Phylum	Omnitrophota
21	306	51.3647		Same Phylum	Omnitrophota
21	307	52.7		Same Phylum	Omnitrophota
21	308	53.0923		Same Phylum	Omnitrophota
21	309	50.5893		Same Phylum	Omnitrophota
21	310	44.5692		Same Phylum	Omnitrophota
21	314	47.1		Same Phylum	Omnitrophota
21	315	44.9778		Same Phylum	Omnitrophota
21	317	42.0111		Same Phylum	Omnitrophota
21	318	37.7571		Same Phylum	Omnitrophota
21	321	35.18		Same Phylum	Omnitrophota
21	325	67.3		Same Phylum	Omnitrophota
21	329	49.4		Same Phylum	Omnitrophota
21	330	58.9		Same Phylum	Omnitrophota
21	331	44.1667		Same Phylum	Omnitrophota
21	333	40.5333		Same Phylum	Omnitrophota
21	334	44.55		Same Phylum	Omnitrophota
21	336	45.0083		Same Phylum	Omnitrophota
21	337	32.6		Same Phylum	Omnitrophota
21	338	42.4824		Same Phylum	Omnitrophota
21	340	41.3312		Same Phylum	Omnitrophota
21	341	45.59		Same Phylum	Omnitrophota
21	342	44.55		Same Phylum	Omnitrophota
21	343	48.725		Same Phylum	Omnitrophota
21	344	42.2714		Same Phylum	Omnitrophota
21	345	48.8		Same Phylum	Omnitrophota
21	346	36.9333		Same Phylum	Omnitrophota
21	347	52.275		Same Phylum	Omnitrophota
21	348	42.2667		Same Phylum	Omnitrophota
21	349	44.3909		Same Phylum	Omnitrophota
21	350	45.0833		Same Phylum	Omnitrophota
21	359	39.1182		Same Phylum	Omnitrophota
21	360	37.05		Same Phylum	Omnitrophota
21	361	35.8222		Same Phylum	Omnitrophota
21	362	43.72		Same Phylum	Omnitrophota
21	363	53.55		Same Phylum	Omnitrophota
21	364	48.565		Same Phylum	Omnitrophota
21	365	49.15		Same Phylum	Omnitrophota
21	366	40.4364		Same Phylum	Omnitrophota
21	367	39.08		Same Phylum	Omnitrophota
21	368	40.8889		Same Phylum	Omnitrophota
21	369	47.8		Same Phylum	Omnitrophota
21	374	44.9143		Same Phylum	Omnitrophota
21	376	46		Same Phylum	Omnitrophota
21	377	48.1714		Same Phylum	Omnitrophota
21	380	42.4286		Same Phylum	Omnitrophota
21	385	54.55		Same Phylum	Omnitrophota
21	387	48.625		Same Phylum	Omnitrophota
21	388	49.875		Same Phylum	Omnitrophota
21	389	58.1		Same Phylum	Omnitrophota
21	390	47.1267		Same Phylum	Omnitrophota
21	392	50.9		Same Phylum	Omnitrophota
21	396	44.4257		Same Phylum	Omnitrophota
21	401	49.0545		Same Phylum	Omnitrophota
21	405	51.0214		Same Phylum	Omnitrophota
21	406	40.9		Same Phylum	Omnitrophota
21	407	45.42		Same Phylum	Omnitrophota
21	408	45.7154		Same Phylum	Omnitrophota
21	415	45.35		Same Phylum	Omnitrophota
21	417	52.0053		Same Phylum	Omnitrophota
21	418	50.6357		Same Phylum	Omnitrophota
21	424	51.8375		Same Domain
21	425	47.1667		Same Domain
21	427	51.1556		Same Domain
21	428	60.25		Same Domain
21	429	38.8429		Same Domain
21	431	50.9		Same Domain
21	432	40.3429		Same Domain
21	433	47.7636		Same Domain
21	434	43.9727		Same Domain
21	435	48.5111		Same Domain
21	440	51.8143		Same Domain
21	442	39.9222		Same Domain
21	444	48.44		Same Domain
21	445	36.2429		Same Domain
21	446	54.7		Same Domain
21	450	43.59		Same Domain
23	1	54.4055		Same Phylum	Omnitrophota
23	2	54.7991		Same Phylum	Omnitrophota
23	5	53.9779		Same Phylum	Omnitrophota
23	12	53.8067		Same Phylum	Omnitrophota
23	13	51.9611		Same Phylum	Omnitrophota
23	15	42.0429		Same Phylum	Omnitrophota
23	16	56.3913		Same Order	1-14-0-20-64-10
23	18	58.1354		Same Order	1-14-0-20-64-10
23	21	57.0897		Same Order	1-14-0-20-64-10
23	23	100	100	Same Species	GCA-001805725-1 sp. GCA-001805725-1
23	24	55.5406		Same Class	Aquiviventia
23	25	59.0065		Same Class	Aquiviventia
23	40	57.9347		Same Class	Aquiviventia
23	45	58.4031		Same Class	Aquiviventia
23	46	57.3475		Same Class	Aquiviventia
23	50	56.6888		Same Class	Aquiviventia
23	53	57.998		Same Class	Aquiviventia
23	54	58.021		Same Class	Aquiviventia
23	55	54.4604		Same Class	Aquiviventia
23	57	50.0333		Same Phylum	Omnitrophota
23	58	48.9471		Same Phylum	Omnitrophota
23	59	54.6451		Same Phylum	Omnitrophota
23	60	53.8073		Same Phylum	Omnitrophota
23	61	52.54		Same Phylum	Omnitrophota
23	63	50.1507		Same Phylum	Omnitrophota
23	65	52.7491		Same Phylum	Omnitrophota
23	67	48.718		Same Phylum	Omnitrophota
23	69	48.3884		Same Phylum	Omnitrophota
23	70	45.8475		Same Phylum	Omnitrophota
23	71	48.3763		Same Phylum	Omnitrophota
23	72	46.845		Same Phylum	Omnitrophota
23	74	47.8225		Same Phylum	Omnitrophota
23	76	50.8084		Same Phylum	Omnitrophota
23	80	51.4872		Same Phylum	Omnitrophota
23	84	47.9882		Same Phylum	Omnitrophota
23	85	51.7538		Same Phylum	Omnitrophota
23	87	54.2286		Same Phylum	Omnitrophota
23	91	52.6033		Same Phylum	Omnitrophota
23	92	52.2167		Same Phylum	Omnitrophota
23	93	46.487		Same Phylum	Omnitrophota
23	94	42.97		Same Phylum	Omnitrophota
23	95	48.2524		Same Phylum	Omnitrophota
23	96	52.6579		Same Phylum	Omnitrophota
23	100	51.2933		Same Phylum	Omnitrophota
23	101	48.8037		Same Phylum	Omnitrophota
23	103	49.0286		Same Phylum	Omnitrophota
23	104	48.9857		Same Phylum	Omnitrophota
23	107	46.2146		Same Phylum	Omnitrophota
23	108	47.3579		Same Phylum	Omnitrophota
23	110	54.5072		Same Phylum	Omnitrophota
23	113	56.057		Same Phylum	Omnitrophota
23	114	55.2523		Same Phylum	Omnitrophota
23	115	55.589		Same Phylum	Omnitrophota
23	116	51.6679		Same Phylum	Omnitrophota
23	131	49.3631		Same Phylum	Omnitrophota
23	133	46.2056		Same Phylum	Omnitrophota
23	136	49.1774		Same Phylum	Omnitrophota
23	140	47.3311		Same Phylum	Omnitrophota
23	144	46.6716		Same Phylum	Omnitrophota
23	146	52.8632		Same Phylum	Omnitrophota
23	149	51.6215		Same Phylum	Omnitrophota
23	150	50.0192		Same Phylum	Omnitrophota
23	152	50.178		Same Phylum	Omnitrophota
23	157	53.0132		Same Phylum	Omnitrophota
23	161	49.938		Same Phylum	Omnitrophota
23	167	51.3971		Same Phylum	Omnitrophota
23	169	49.5911		Same Phylum	Omnitrophota
23	170	50.5735		Same Phylum	Omnitrophota
23	171	53.4983		Same Phylum	Omnitrophota
23	174	53.615		Same Phylum	Omnitrophota
23	175	50.8047		Same Phylum	Omnitrophota
23	177	49.6		Same Phylum	Omnitrophota
23	178	50.5541		Same Phylum	Omnitrophota
23	179	50.6529		Same Phylum	Omnitrophota
23	183	46.6551		Same Phylum	Omnitrophota
23	186	54.6367		Same Phylum	Omnitrophota
23	189	51.1718		Same Phylum	Omnitrophota
23	190	51.7755		Same Phylum	Omnitrophota
23	194	54.5457		Same Phylum	Omnitrophota
23	195	52.126		Same Phylum	Omnitrophota
23	196	51.5848		Same Phylum	Omnitrophota
23	202	50.3828		Same Phylum	Omnitrophota
23	205	48.7885		Same Phylum	Omnitrophota
23	210	55.8879		Same Phylum	Omnitrophota
23	211	54.3907		Same Phylum	Omnitrophota
23	213	53.3457		Same Phylum	Omnitrophota
23	214	57.55		Same Phylum	Omnitrophota
23	215	43.65		Same Phylum	Omnitrophota
23	218	37.4167		Same Phylum	Omnitrophota
23	221	53.55		Same Phylum	Omnitrophota
23	223	44.9727		Same Phylum	Omnitrophota
23	224	44.6781		Same Phylum	Omnitrophota
23	226	42.28		Same Phylum	Omnitrophota
23	227	44.3333		Same Phylum	Omnitrophota
23	228	42.8333		Same Phylum	Omnitrophota
23	229	41.6625		Same Phylum	Omnitrophota
23	230	49.1286		Same Phylum	Omnitrophota
23	231	52.5692		Same Phylum	Omnitrophota
23	233	43.3		Same Phylum	Omnitrophota
23	236	43.7381		Same Phylum	Omnitrophota
23	238	49.2533		Same Phylum	Omnitrophota
23	240	49.2313		Same Phylum	Omnitrophota
23	241	50.7107		Same Phylum	Omnitrophota
23	247	49.5333		Same Phylum	Omnitrophota
23	249	44.5667		Same Phylum	Omnitrophota
23	253	45.89		Same Phylum	Omnitrophota
23	258	46.4303		Same Phylum	Omnitrophota
23	259	49.8		Same Phylum	Omnitrophota
23	260	47.3275		Same Phylum	Omnitrophota
23	262	52.2053		Same Phylum	Omnitrophota
23	263	51.7905		Same Phylum	Omnitrophota
23	264	50.0469		Same Phylum	Omnitrophota
23	265	45.7529		Same Phylum	Omnitrophota
23	267	49.4348		Same Phylum	Omnitrophota
23	269	46.0143		Same Phylum	Omnitrophota
23	272	51.5192		Same Phylum	Omnitrophota
23	273	45.5917		Same Phylum	Omnitrophota
23	277	46.6882		Same Phylum	Omnitrophota
23	280	46.5429		Same Phylum	Omnitrophota
23	285	45.1024		Same Phylum	Omnitrophota
23	288	48.204		Same Phylum	Omnitrophota
23	289	40.8136		Same Phylum	Omnitrophota
23	294	47.6882		Same Phylum	Omnitrophota
23	295	32.65		Same Phylum	Omnitrophota
23	297	47.7154		Same Phylum	Omnitrophota
23	298	47.6		Same Phylum	Omnitrophota
23	301	50.319		Same Phylum	Omnitrophota
23	302	43.4364		Same Phylum	Omnitrophota
23	304	45.432		Same Phylum	Omnitrophota
23	305	50.6882		Same Phylum	Omnitrophota
23	306	47.1714		Same Phylum	Omnitrophota
23	307	49.804		Same Phylum	Omnitrophota
23	308	46.9417		Same Phylum	Omnitrophota
23	309	51.5735		Same Phylum	Omnitrophota
23	310	47.5125		Same Phylum	Omnitrophota
23	314	43.7077		Same Phylum	Omnitrophota
23	315	43.5955		Same Phylum	Omnitrophota
23	317	43.471		Same Phylum	Omnitrophota
23	318	41.2714		Same Phylum	Omnitrophota
23	320	40.425		Same Phylum	Omnitrophota
23	321	43.2778		Same Phylum	Omnitrophota
23	325	37.1833		Same Phylum	Omnitrophota
23	329	46.3556		Same Phylum	Omnitrophota
23	330	47.54		Same Phylum	Omnitrophota
23	331	39.4857		Same Phylum	Omnitrophota
23	333	37.5833		Same Phylum	Omnitrophota
23	334	48.8125		Same Phylum	Omnitrophota
23	336	41.1562		Same Phylum	Omnitrophota
23	337	46.85		Same Phylum	Omnitrophota
23	338	43.01		Same Phylum	Omnitrophota
[truncated: 45,873 more rows]

## Sheet: Table S4 - Cell size data
est. cell diameter	est. cell diameter		obs. cell diameter	obs. cell diameter		Filter pore sizes (µm)	Filter pore sizes (µm)	Filter pore sizes (µm)	Filter pore sizes (µm)	Filter pore sizes (µm)	Filter pore sizes (µm)	Filter pore sizes (µm)	Filter pore sizes (µm)
SAG	particle size (µm)		BIN	cell diameter (µm)		MAG	3	2.5	1.2	0.8	0.65	0.2	0.1
18	0.14		104	2.5		143			0			1	0
51	0.14		417	0.2		191			0			1	0
301	0.23					194			0			1	0
52	0.13					145			0			1	0
244	0.17					80			0			1	0
196	0.22					148			0			1	0
238	0.15					1			0			1	0
328	0.2					12			0			1	0
193	2.49					181			1			0	0
49	0.89					84			0			0	1
416	0.21					146			0			0	1
32	0.21					149			0			0	1
9	0.2					182			0			1	0
10	0.2					81			0			1	0
75	0.24					183			1			0	0
248	0.2					82			1			0	0
33	0.25					150			1			0	0
53	0.25					250			0			1	0
34	0.25					394			0			1	0
35	0.24					270			0			1	0
197	0.23					36			0			1	0
50	0.25					395			0			1	0
13	0.2					251			0			1	0
249	0.22					37			0			1	0
310	0.23					199			0			1	0
365	0.2					184			0			1	0
11	0.21					83			0			0	1
201	0.21					258			0			1	0
245	0.21					266			0			1	0
264	0.25					271			0			1	0
						396			0			1	0
						239			0			0	1
						109			0			0	1
						265			0			0	1
						390			0			1	0
						391			0			1	0
						240			0			1	0
						260			0			1	0
						241			0			1	0
						38			0			1	0
						24			0			1	0
						39			1			0	0
						320			0			0	1
						392			0			1	0
						110			0			1	0
						40			0			1	0
						393			1			0	0
						261			1			0	0
						111			1			0	0
						349			1			0	0
						41			1			0	0
						253			0			1	0
						402			0			1	0
						254			0			1	0
						403			0			1	0
						255			0			1	0
						397			0			1	0
						404			0			1	0
						133	0			0		1
						447	0			0		1
						116	0			0		1
						65	0			0		1
						408	0			0		1
						2	0			0		1
						118		0			0	1	0
						370	0			0		1	0
						5	0			1		0	0
						63	0			1		0	0
						119	0			1		0	0
						139	1			0		0	0
						448	1			0		0	0
						449		0			0	1	0
						140		0			1	0	0
						151		0			1	0	0
						120		0			1	0	0
						450	1			0		0
						451	1			0		0
						121	1			0		0
						410	0			1		0
						122	0			1		0
						16		0			0	1	0
						325		0			0	1	0
						152		0			0	1	0
						136	0			0		1
						123	0			0		1
						452	1
						411	0			0		1
						25		0			0	1	0
						316		0			0	1	0
						331		0			0	1	0
						153		0			1	0	0
						242		0			1	0	0
						17		0			0	1	0
						26		0			0	1	0
						141		0			1	0	0
						124	0			0		1
						412	0			0		1
						134	0			0		1
						453	0			0		1
						326		0			0	1	0
						154		0			0	1	0
						64	0			1		0	0
						6	0			1		0	0
						125	0			1		0	0
						142	1			0		0	0
						317		0			0	1	0
						332		0			0	1	0
						126		0			0	1	0
						372	0			0		1	0
						3	0			0		1
						66	0			0		1
						7	0			0		1
						127		0			1	0	0
						413	0			1		0
						414	0			0		1
						128	1			0		0
						129	0			1		0
						138	0			0		1
						130	0			0		1

## Sheet: Table S5 - KEGG Modules
		GCS : Glycine cleavage system	GCS : Glycine cleavage system	GCS : Glycine cleavage system	GCS : Glycine cleavage system	GCS : Glycine cleavage system	GCS : Glycine cleavage system	GCS : Glycine cleavage system	GDC : Glycine synthesis from glyoxylate	GDC : Glycine synthesis from glyoxylate	GDC : Glycine synthesis from glyoxylate	GDC : Glycine synthesis from glyoxylate	M00001 : Glycolysis (Embden-Meyerhof pathway), glucose => pyruvate	M00001 : Glycolysis (Embden-Meyerhof pathway), glucose => pyruvate	M00001 : Glycolysis (Embden-Meyerhof pathway), glucose => pyruvate	M00001 : Glycolysis (Embden-Meyerhof pathway), glucose => pyruvate	M00001 : Glycolysis (Embden-Meyerhof pathway), glucose => pyruvate	M00001 : Glycolysis (Embden-Meyerhof pathway), glucose => pyruvate	M00001 : Glycolysis (Embden-Meyerhof pathway), glucose => pyruvate	M00001 : Glycolysis (Embden-Meyerhof pathway), glucose => pyruvate	M00001 : Glycolysis (Embden-Meyerhof pathway), glucose => pyruvate	M00001 : Glycolysis (Embden-Meyerhof pathway), glucose => pyruvate	M00001 : Glycolysis (Embden-Meyerhof pathway), glucose => pyruvate	M00001 : Glycolysis (Embden-Meyerhof pathway), glucose => pyruvate	M00001 : Glycolysis (Embden-Meyerhof pathway), glucose => pyruvate	M00001 : Glycolysis (Embden-Meyerhof pathway), glucose => pyruvate	M00001 : Glycolysis (Embden-Meyerhof pathway), glucose => pyruvate	M00001 : Glycolysis (Embden-Meyerhof pathway), glucose => pyruvate	M00001 : Glycolysis (Embden-Meyerhof pathway), glucose => pyruvate	M00001 : Glycolysis (Embden-Meyerhof pathway), glucose => pyruvate	M00001 : Glycolysis (Embden-Meyerhof pathway), glucose => pyruvate	M00001 : Glycolysis (Embden-Meyerhof pathway), glucose => pyruvate	M00001 : Glycolysis (Embden-Meyerhof pathway), glucose => pyruvate	M00001 : Glycolysis (Embden-Meyerhof pathway), glucose => pyruvate	M00001 : Glycolysis (Embden-Meyerhof pathway), glucose => pyruvate	M00001 : Glycolysis (Embden-Meyerhof pathway), glucose => pyruvate	M00001 : Glycolysis (Embden-Meyerhof pathway), glucose => pyruvate	M00001 : Glycolysis (Embden-Meyerhof pathway), glucose => pyruvate	M00001 : Glycolysis (Embden-Meyerhof pathway), glucose => pyruvate	M00001 : Glycolysis (Embden-Meyerhof pathway), glucose => pyruvate	M00001 : Glycolysis (Embden-Meyerhof pathway), glucose => pyruvate	M00001 : Glycolysis (Embden-Meyerhof pathway), glucose => pyruvate	M00002 : Glycolysis, core module involving three-carbon compounds	M00002 : Glycolysis, core module involving three-carbon compounds	M00002 : Glycolysis, core module involving three-carbon compounds	M00002 : Glycolysis, core module involving three-carbon compounds	M00002 : Glycolysis, core module involving three-carbon compounds	M00002 : Glycolysis, core module involving three-carbon compounds	M00002 : Glycolysis, core module involving three-carbon compounds
		GCS	K00281	K00282	K00283	K00382	K00605	K02437	GDC	K00827	K00830	K14272	M00001	K00134	K00150	K00844	K00845	K00850	K00873	K00886	K00918	K00927	K01623	K01624	K01689	K01803	K01810	K01834	K06859	K08074	K11389	K11645	K12406	K12407	K13810	K15633	K15634	K15635	K15916	K16305	K16306	K16370	M00002	K00134	K00150	K00873	K00927	K01689	K01803
4484-213	15	0	0	0	0	0	0	1	0	0	0	0	0.777778	1	0	0	1	2	0	0	0	3	0	0	1	1	0	0	1	0	0	0	0	0	0	0	0	2	1	0	0	0	0.8	1	0	0	3	1	1
Omnitrophia	190	0	0	2	0	2	0	2	0	0	0	0	0.666667	0	0	0	2	2	0	0	0	2	0	0	2	2	0	2	0	0	0	0	0	0	0	0	0	2	2	0	0	0	0.6	0	0	0	2	2	2
Omnitrophia	152	1	0	2	2	2	2	2	0	0	0	0	0.888889	2	2	0	3	2	6	0	0	2	2	0	2	2	0	2	0	0	0	0	0	0	0	0	0	2	0	0	0	2	1	2	2	6	2	2	2
Omnitrophia	183	1	0	2	2	2	2	2	0	0	0	0	0.888889	2	0	2	4	0	2	0	0	2	0	2	2	2	2	2	0	0	0	0	0	0	0	0	0	2	2	0	0	0	1	2	0	2	2	2	2
Omnitrophia	146	1	0	2	2	4	2	2	0	0	0	0	0.666667	4	0	0	2	2	0	0	0	2	0	0	2	2	0	2	0	0	0	0	0	0	0	0	0	4	0	0	0	0	0.8	4	0	0	2	2	2
Omnitrophia	150	1	0	2	2	3	2	2	0	0	0	0	0.555556	0	0	0	0	1	0	0	0	2	0	0	2	2	0	0	0	0	0	0	0	0	0	0	0	4	2	0	0	0	0.6	0	0	0	2	2	2
Omnitrophia	149	1	0	2	2	4	2	2	0	0	0	0	0.555556	2	0	0	2	0	0	0	0	2	0	0	2	2	0	2	0	0	0	0	0	0	0	0	0	4	0	0	0	0	0.8	2	0	0	2	2	2
Omnitrophia	189	1	0	1	1	1	2	2	0	0	0	0	0.333333	1	0	0	0	0	0	0	0	0	0	0	1	0	0	1	0	0	0	0	0	0	0	0	0	2	1	0	0	0	0.4	1	0	0	0	1	0
Omnitrophia	186	0	0	0	1	1	0	0	0	0	0	0	0.222222	0	0	0	0	1	0	0	0	0	0	0	0	0	0	1	0	0	0	0	0	0	0	0	0	1	0	0	0	0	0.2	0	0	0	0	0	0
Omnitrophia	202	1	0	1	1	0	1	1	0	0	0	0	1	1	0	0	1	2	1	0	0	1	0	0	1	1	0	1	0	0	0	1	0	0	1	0	0	1	0	0	0	0	1	1	0	1	1	1	1
Omnitrophia	194	1	0	2	2	2	2	2	0	0	0	0	0.777778	2	0	0	3	0	6	0	0	2	0	0	4	2	0	2	0	0	0	0	0	0	0	0	0	0	2	0	0	0	1	2	0	6	2	4	2
Omnitrophia	196	1	0	1	1	2	0	1	0	0	0	0	0.444444	0	0	0	1	0	0	0	0	0	0	0	0	1	0	0	0	0	0	0	0	0	1	0	0	2	0	0	0	0	0.4	0	0	0	0	0	1
Omnitrophia	195	1	0	1	1	1	1	1	0	0	0	0	0.666667	1	0	0	1	1	1	0	0	0	0	0	1	0	0	1	0	0	0	0	0	0	1	0	0	1	1	0	0	0	0.6	1	0	1	0	1	0
Omnitrophia	174	0	0	0	0	0	1	1	0	0	0	0	0.222222	0	0	0	0	0	0	0	0	1	0	0	0	1	0	0	0	0	0	0	0	0	0	0	0	0	1	0	0	0	0.2	0	0	0	1	0	1
Omnitrophia	171	1	0	1	0	1	1	1	0	0	0	0	0.888889	1	0	0	1	0	1	0	0	1	0	1	1	1	0	1	0	0	0	0	0	0	1	0	0	1	1	0	0	0	1	1	0	1	1	1	1
Omnitrophia	179	1	0	1	1	1	1	1	0	0	0	0	0.888889	1	0	0	1	0	1	0	0	1	0	1	1	2	0	0	0	0	0	0	0	0	1	0	0	1	1	0	0	0	1	1	0	1	1	1	2
Omnitrophia	178	1	0	1	1	0	1	1	0	0	0	0	0.777778	1	0	0	0	0	1	0	0	1	0	1	1	2	0	1	0	0	0	0	0	0	1	0	0	1	1	0	0	0	1	1	0	1	1	1	2
Omnitrophia	177	1	0	1	1	1	1	1	0	0	0	0	1	1	0	0	1	1	1	0	0	1	0	1	1	1	0	1	0	0	0	0	0	0	1	0	0	2	0	0	0	0	1	1	0	1	1	1	1
Omnitrophia	175	1	0	0	1	1	1	1	0	0	0	0	0.888889	1	0	0	2	0	1	0	0	1	0	0	1	2	0	1	0	0	0	1	0	0	1	0	0	2	0	0	0	0	1	1	0	1	1	1	2
Omnitrophia	167	0	0	0	0	1	0	0	0	0	0	0	0.777778	1	0	0	0	0	2	0	0	1	0	1	2	1	2	0	0	0	0	1	0	0	0	0	0	1	1	0	0	0	1	1	0	2	1	2	1
Omnitrophia	163	1	0	1	1	1	1	1	0	0	0	0	1	1	0	1	1	1	1	0	0	1	0	1	1	2	1	1	0	0	0	0	0	0	0	0	0	1	1	0	0	0	1	1	0	1	1	1	2
Omnitrophia	170	1	0	1	1	1	1	1	0	0	0	0	0.777778	1	0	0	1	0	0	0	0	1	0	1	1	1	1	1	0	0	0	0	0	0	1	0	0	1	1	0	0	0	0.8	1	0	0	1	1	1
Omnitrophia	157	1	0	1	1	1	1	1	0	0	0	0	0.666667	1	0	0	0	0	0	0	0	1	0	1	1	2	0	1	0	0	0	0	0	0	1	0	0	1	1	0	0	0	0.8	1	0	0	1	1	2
Omnitrophia	169	0	0	0	0	2	0	2	0	0	0	0	0.555556	0	0	0	0	0	2	0	0	0	0	2	2	0	0	2	1	0	0	0	0	0	2	0	0	2	2	0	0	0	0.6	0	0	2	0	2	0
2-02-FULL-51-18	13	1	0	1	1	0	1	1	0	0	0	0	0.444444	2	0	0	0	1	0	0	0	1	0	0	0	1	0	1	0	0	0	0	0	0	0	0	0	1	0	0	0	0	0.6	2	0	0	1	0	1
2-02-FULL-51-18	12	0	0	0	0	2	0	0	0	0	0	0	0.666667	2	0	0	2	2	0	0	0	4	0	0	2	4	0	2	0	0	0	0	0	0	0	0	0	0	0	0	0	0	0.8	2	0	0	4	2	4
2-02-FULL-51-18	1	1	0	2	2	2	2	2	0	0	0	0	0.777778	2	0	0	2	2	4	0	0	2	0	0	2	3	0	2	0	0	0	0	0	0	0	0	0	2	0	0	0	2	1	2	0	4	2	2	3
2-02-FULL-51-18	5	0	0	0	0	0	2	2	0	0	0	0	0.777778	2	0	0	2	2	2	0	0	2	0	0	2	2	0	0	0	0	0	0	0	0	0	0	0	4	0	0	0	0	1	2	0	2	2	2	2
2-02-FULL-51-18	2	1	0	2	2	2	2	2	0	0	0	0	0.666667	4	0	0	2	2	2	0	0	2	0	0	0	2	0	2	0	0	0	0	0	0	0	0	0	2	0	0	0	0	0.8	4	0	2	2	0	2
Incertae-sedis	60	1	0	1	1	2	0	1	0	0	0	0	0.666667	1	0	0	0	1	0	0	0	1	0	0	1	1	0	0	0	0	0	0	0	0	0	0	0	2	1	0	0	0	0.8	1	0	0	1	1	1
Incertae-sedis	59	1	0	1	1	0	0	0	0	0	0	0	0.333333	1	0	0	0	0	0	0	0	2	0	0	0	2	0	1	0	0	0	0	0	0	0	0	0	2	0	0	0	0	0.6	1	0	0	2	0	2
Aquiviventia	23	1	0	2	2	2	2	2	0	0	0	0	0.444444	2	0	0	2	0	0	0	0	0	0	0	2	0	0	2	0	0	0	0	0	0	0	0	0	2	2	0	0	0	0.4	2	0	0	0	2	0
Aquivivia	16	1	0	2	0	3	3	2	0	0	0	0	0.777778	2	0	0	0	2	2	0	0	2	0	0	2	2	0	2	0	0	0	0	0	0	0	0	0	2	2	0	0	2	1	2	0	2	2	2	2
Aquivivia	18	1	0	1	1	0	1	1	0	0	0	0	0.444444	0	0	0	0	0	0	0	0	1	0	0	1	1	0	1	1	0	0	0	0	0	0	0	0	0	1	0	0	0	0.6	0	0	0	1	1	1
Aquivivia	21	1	0	1	1	1	1	1	0	0	0	0	0.444444	1	0	0	1	1	0	0	0	1	0	0	0	1	0	0	0	0	0	0	0	0	0	0	0	0	0	0	0	0	0.4	1	0	0	1	0	1
Aquivivia	55	1	0	1	1	1	1	1	0	0	0	0	0.555556	1	0	0	0	1	0	0	0	1	0	0	1	1	0	0	0	0	0	0	0	0	0	0	0	1	0	0	0	0	0.8	1	0	0	1	1	1
Aquivivia	40	1	0	2	2	2	2	2	0	0	0	0	0.777778	2	0	0	2	2	2	0	0	2	0	0	2	2	0	2	0	0	0	0	0	0	0	0	0	2	0	0	0	0	1	2	0	2	2	2	2
Aquivivia	50	0	0	0	0	0	0	0	0	0	0	0	0.555556	2	0	0	0	2	0	0	0	2	0	0	2	2	0	2	0	0	0	0	0	0	0	0	0	0	0	0	0	0	0.8	2	0	0	2	2	2
Aquivivia	46	1	0	1	1	0	1	1	0	0	0	0	0.555556	1	0	0	0	1	0	0	0	1	0	0	2	1	0	0	0	0	0	0	0	0	0	0	0	1	0	0	0	0	0.8	1	0	0	1	2	1
Aquivivia	45	1	0	2	2	0	0	0	0	0	0	0	0.444444	2	0	0	2	0	0	0	0	2	0	0	0	2	0	2	0	0	0	0	0	0	0	0	0	2	0	0	0	0	0.6	2	0	0	2	0	2
Aquivivia	53	1	0	2	2	0	2	2	0	0	0	0	0.444444	4	0	0	0	0	0	0	0	4	0	0	2	6	0	4	0	0	0	0	0	0	0	0	0	2	0	0	0	0	0.8	4	0	0	4	2	6
Aquivivia	54	1	0	1	1	1	1	1	0	0	0	0	0.888889	2	0	0	1	1	1	0	0	1	1	0	1	2	0	0	0	0	0	0	0	0	0	0	0	2	0	0	0	0	1	2	0	1	1	1	2
Aquivivia	25	1	0	2	2	2	2	2	0	0	0	0	0.888889	2	0	0	2	2	2	0	0	2	0	0	4	2	0	2	0	0	0	0	0	0	2	0	0	4	0	0	0	0	1	2	0	2	2	4	2
Aquivivia	24	1	0	2	2	2	2	2	0	0	0	0	0.333333	0	0	0	2	2	0	0	0	0	0	0	0	0	0	2	0	0	0	0	0	0	0	0	0	4	0	0	0	0	0.2	0	0	0	0	0	0
Makaraimicrobia	115	1	0	1	1	1	1	1	0	0	0	0	1	1	0	0	2	1	1	0	0	1	0	1	1	1	1	1	0	0	0	0	0	0	0	0	1	1	1	0	0	0	1	1	0	1	1	1	1
Makaramicrobia	110	1	0	2	2	2	2	2	0	0	0	0	0.888889	2	0	0	2	2	0	0	0	2	0	2	2	2	2	2	0	0	0	0	0	0	0	0	0	2	2	0	0	0	0.8	2	0	0	2	2	2
Makaramicrobia	113	1	0	1	1	1	1	1	0	0	0	0	0.888889	2	0	0	2	1	0	0	0	1	0	1	1	1	1	1	0	0	0	0	0	0	0	0	0	1	1	0	0	0	0.8	2	0	0	1	1	1
Makaramicrobia	114	1	0	1	1	1	1	1	0	0	0	0	0.888889	1	0	0	2	1	0	0	0	1	0	1	1	1	1	1	0	0	0	0	0	0	0	0	0	1	1	0	0	0	0.8	1	0	0	1	1	1
Makaramicrobia	65	0	0	0	0	0	0	0	0	0	0	0	0.666667	2	0	0	0	2	0	0	0	6	0	2	0	2	2	0	0	0	0	0	0	0	0	0	0	4	2	0	0	0	0.6	2	0	0	6	0	2
Makaramicrobia	131	0	0	0	0	1	0	0	0	0	0	0	1	1	0	0	1	1	1	0	0	1	0	2	1	1	0	1	0	0	0	0	0	0	0	0	0	0	1	0	0	0	1	1	0	1	1	1	1
Makaramicrobia	140	0	0	0	0	2	0	0	0	0	0	0	0.555556	0	0	0	0	0	0	0	0	2	0	2	2	4	0	2	0	0	0	0	0	0	0	0	0	2	2	0	0	0	0.6	0	0	0	2	2	4
Makaramicrobia	136	0	0	0	0	4	0	0	1	0	1	0	1	2	0	0	2	2	2	0	0	2	0	2	6	2	0	2	0	0	0	0	0	0	0	0	0	2	2	0	0	0	1	2	0	2	2	6	2
Makaramicrobia	144	0	0	0	0	2	0	0	0	0	0	0	1	1	0	0	1	1	1	0	0	1	0	1	1	2	0	1	0	0	0	0	0	0	0	0	0	1	1	0	0	0	1	1	0	1	1	1	2
Makaramicrobia	133	0	0	0	0	2	0	0	0	0	0	0	0.555556	2	0	0	0	0	0	0	0	4	0	0	2	2	0	2	0	0	0	0	0	0	0	0	0	0	2	0	0	0	0.8	2	0	0	4	2	2
Makaramicrobia	120	0	0	0	0	0	0	0	0	0	0	0	0.888889	2	0	0	2	2	0	0	0	2	0	2	2	2	0	2	0	0	0	0	0	0	0	0	0	2	2	0	0	0	0.8	2	0	0	2	2	2
Makaramicrobia	72	1	0	1	1	1	1	1	0	0	0	0	1	1	0	0	1	1	1	0	0	1	0	1	1	1	1	1	0	0	0	0	0	0	0	0	0	1	0	0	0	0	1	1	0	1	1	1	1
Makaramicrobia	71	1	1	1	2	1	2	2	0	0	0	0	1	1	0	0	1	2	2	0	0	1	0	0	1	1	1	1	0	0	0	1	0	0	0	0	0	1	0	0	0	0	1	1	0	2	1	1	1
Makaramicrobia	63	0	0	0	0	2	0	0	0	0	0	0	1	2	0	0	2	4	2	0	0	2	0	2	2	2	0	0	0	0	0	0	0	0	0	0	0	4	2	0	0	0	1	2	0	2	2	2	2
Makaramicrobia	67	0	0	0	0	0	0	0	0	0	0	0	0.777778	1	0	0	2	2	0	0	0	1	0	0	1	1	1	0	0	0	0	0	0	0	0	0	0	3	1	0	0	0	0.8	1	0	0	1	1	1
Makaramicrobia	70	0	0	0	0	0	0	0	0	0	0	0	0.666667	2	0	0	2	4	2	0	0	2	0	0	0	2	0	0	0	0	0	0	0	0	0	0	0	2	0	0	0	0	0.8	2	0	2	2	0	2
Makaramicrobia	69	0	0	0	0	1	0	0	0	0	0	0	0.666667	1	0	0	1	1	0	0	0	1	0	0	1	1	0	0	0	0	0	0	0	0	0	0	0	1	0	0	0	0	0.8	1	0	0	1	1	1
Makaramicrobia	74	0	0	0	0	1	0	0	0	0	0	0	0.888889	1	0	0	1	2	2	0	0	1	0	0	1	1	0	0	0	0	0	0	0	0	0	0	0	3	1	0	0	0	1	1	0	2	1	1	1
Makaramicrobia	76	0	0	0	0	1	0	0	0	0	0	0	1	1	0	0	1	2	2	0	0	1	0	1	1	1	0	0	0	0	0	0	0	0	0	0	0	2	1	0	0	0	1	1	0	2	1	1	1
Makaramicrobia	80	0	0	0	0	2	0	0	0	0	0	0	0.888889	2	0	0	2	2	4	0	0	2	0	0	2	2	0	0	0	0	0	0	0	0	0	0	0	2	2	0	0	0	1	2	0	4	2	2	2
Makaramicrobia	84	0	0	0	0	1	0	0	0	0	0	0	0.777778	0	0	2	0	2	2	0	0	2	0	0	2	2	0	0	0	0	0	0	0	0	0	0	0	2	2	0	0	0	0.8	0	0	2	2	2	2
Makaramicrobia	91	0	0	0	0	1	0	0	0	0	0	0	0.888889	2	0	1	0	1	1	0	0	1	0	0	1	1	0	1	0	0	0	0	0	0	0	0	0	1	1	0	0	0	1	2	0	1	1	1	1
Makaramicrobia	92	0	0	0	0	1	0	0	0	0	0	0	0.444444	0	0	1	0	0	1	0	0	0	0	0	0	0	1	1	0	0	0	0	0	0	0	0	0	1	1	0	0	0	0.4	0	0	1	0	0	0
Makaramicrobia	87	1	0	1	1	1	1	1	0	0	0	0	0.666667	1	0	1	0	0	0	0	0	1	0	0	1	1	1	1	0	0	0	0	0	0	0	0	0	1	1	0	0	0	0.8	1	0	0	1	1	1
Makaramicrobia	85	0	0	0	0	1	0	0	0	0	0	0	0.777778	1	0	1	0	1	0	0	0	1	0	0	1	1	1	1	0	0	0	0	0	0	0	0	0	1	1	0	0	0	0.8	1	0	0	1	1	1
Makaramicrobia	93	1	0	0	1	1	1	1	0	0	0	0	1	1	0	0	1	2	2	0	0	1	0	0	1	1	1	1	0	0	0	1	0	0	0	0	0	1	0	0	0	0	1	1	0	2	1	1	1
Makaramicrobia	107	0	0	0	0	1	0	0	0	0	0	0	1	1	0	1	0	2	2	0	0	1	0	1	1	1	0	0	0	0	0	0	0	0	0	0	0	2	1	0	0	0	1	1	0	2	1	1	1
Makaramicrobia	108	0	0	0	0	0	0	0	0	0	0	0	0.888889	2	0	2	0	3	2	0	0	2	0	0	2	2	0	0	0	0	0	0	0	0	0	0	0	4	2	0	0	0	1	2	0	2	2	2	2
Makaramicrobia	94	1	0	1	1	1	1	1	0	0	0	0	0.888889	1	0	0	1	0	1	0	0	1	0	0	1	1	1	1	0	0	0	1	0	0	0	0	0	1	0	0	0	0	1	1	0	1	1	1	1
Makaramicrobia	96	1	0	1	1	1	1	1	0	0	0	0	0.888889	1	0	1	1	0	1	0	0	1	0	1	1	2	1	1	0	0	0	1	0	0	0	1	0	1	0	0	0	0	1	1	0	1	1	1	2
Makaramicrobia	104	1	0	2	2	2	2	2	0	0	0	0	0.888889	2	0	0	2	2	0	0	0	2	0	2	2	2	2	0	0	0	0	0	0	0	0	2	0	2	0	0	0	0	0.8	2	0	0	2	2	2
Makaramicrobia	103	1	0	2	1	1	1	2	0	0	0	0	0.888889	1	0	0	1	0	1	0	0	1	0	0	1	1	1	1	0	0	0	1	0	0	0	1	0	1	0	0	0	0	1	1	0	1	1	1	1
Makaramicrobia	95	1	0	1	1	1	1	1	0	0	0	0	0.888889	1	0	0	1	0	1	0	0	1	0	1	1	1	1	1	0	0	0	1	0	0	0	1	0	1	0	0	0	0	1	1	0	1	1	1	1
Makaramicrobia	100	1	0	1	1	1	1	1	0	0	0	0	0.555556	0	0	0	1	0	0	0	0	0	0	1	1	0	1	1	0	0	0	0	0	0	0	0	0	1	0	0	0	0	0.4	0	0	0	0	1	0
Makaramicrobia	101	1	0	1	1	1	1	1	0	0	0	0	0.777778	1	0	0	1	0	0	0	0	2	0	1	1	2	1	0	0	0	0	0	0	0	0	2	0	1	0	0	0	0	0.8	1	0	0	2	1	2
Incertae-sedis	61	0	0	0	0	1	0	0	0	0	0	0	0.888889	1	0	0	2	1	1	0	0	1	0	1	1	1	0	0	0	0	0	0	0	0	0	0	0	2	0	0	1	0	1	1	0	1	1	1	1
Incertae-sedis	57	1	0	0	1	1	1	1	0	0	0	0	0.666667	1	0	0	0	0	1	0	0	1	0	0	1	1	1	1	0	0	0	0	0	0	0	0	0	0	0	0	0	0	1	1	0	1	1	1	1
Incertae-sedis	58	1	0	1	1	1	1	1	0	0	0	0	0.777778	1	0	0	2	0	1	0	0	1	0	1	1	1	0	1	0	0	0	0	0	0	0	0	1	1	0	0	0	0	1	1	0	1	1	1	1
Incertae-sedis	205	0	0	0	0	0	0	0	0	0	0	0	0.444444	2	0	0	2	4	2	0	0	0	0	0	0	0	0	0	0	0	0	0	0	0	0	0	0	2	0	0	0	0	0.4	2	0	2	0	0	0
Vampiricoccoidia	214	0	0	0	0	1	0	0	0	0	0	0	1	2	0	0	1	2	1	0	0	1	0	1	1	1	0	0	0	0	0	0	0	0	0	0	0	2	1	0	0	0	1	2	0	1	1	1	1
Vampirococcoidia	213	0	0	0	0	1	0	0	0	0	0	0	0.888889	2	0	0	1	1	1	0	0	2	0	0	1	1	0	0	0	0	0	0	0	0	0	0	0	2	1	0	0	0	1	2	0	1	2	1	1
Vampirococcoidia	211	0	0	0	0	1	0	0	0	0	0	0	0.888889	1	0	0	1	2	1	0	0	2	0	0	2	1	0	0	0	0	0	0	0	0	0	1	0	2	1	0	0	0	1	1	0	1	2	2	1
Vampirococcoidia	210	0	0	0	0	0	0	0	0	0	0	0	0.666667	1	0	0	1	2	0	0	0	2	0	0	2	0	0	0	0	0	0	0	0	0	0	1	0	2	1	0	0	0	0.6	1	0	0	2	2	0
Vampirococcoidia	236	0	0	0	0	0	0	1	0	0	0	0	0.777778	1	0	0	1	2	1	0	0	1	0	0	1	1	0	0	0	0	0	0	0	0	0	0	0	2	0	0	0	0	1	1	0	1	1	1	1
Vampirococcoidia	223	1	0	1	1	0	1	1	0	0	0	0	0.777778	1	0	0	2	1	1	0	0	1	0	0	1	1	0	1	0	0	0	0	0	0	0	0	0	0	0	0	0	0	1	1	0	1	1	1	1
Vampirococcoidia	221	1	0	1	1	0	1	0	0	0	0	0	0.777778	2	0	0	1	1	1	0	0	2	0	0	1	1	0	1	0	0	0	0	0	0	0	0	0	1	0	0	0	0	1	2	0	1	2	1	1
Vampirococcoidia	224	1	0	1	1	0	1	1	0	0	0	0	0.777778	1	0	0	2	0	1	0	0	1	0	1	1	1	0	1	0	0	0	0	0	0	0	0	0	1	0	0	0	0	1	1	0	1	1	1	1
Vampirococcoidia	230	1	0	1	1	0	0	1	0	0	0	0	0.777778	1	0	0	1	1	0	0	0	2	0	0	1	1	0	0	0	0	0	1	0	0	0	0	0	2	0	0	0	0	0.8	1	0	0	2	1	1
Vampirococcoidia	229	1	0	2	2	1	1	2	0	0	0	0	0.777778	1	0	0	0	0	1	0	0	1	0	0	1	1	1	0	0	0	0	1	0	0	0	0	0	2	0	0	0	0	1	1	0	1	1	1	1
Vampirococcoidia	215	1	0	1	1	0	1	1	0	0	0	0	0.666667	1	0	0	1	0	1	0	0	1	0	0	1	1	0	1	0	0	0	0	0	0	0	0	0	2	0	0	0	0	1	1	0	1	1	1	1
Vampirococcoidia	233	1	0	1	1	0	1	2	0	0	0	0	0.777778	1	0	1	0	1	1	0	0	2	0	0	1	1	0	0	0	0	0	0	0	0	0	0	0	2	0	0	0	0	1	1	0	1	2	1	1
Vampirococcoidia	231	1	0	1	1	0	1	1	0	0	0	0	0.666667	1	0	1	0	0	1	0	0	1	0	0	1	1	0	0	0	0	0	0	0	0	0	0	0	2	0	0	0	0	1	1	0	1	1	1	1
Vampirococcoidia	218	1	0	2	2	0	2	2	0	0	0	0	0.666667	2	0	0	0	2	2	0	0	2	0	0	2	2	0	0	0	0	0	0	0	0	0	0	0	4	0	0	0	0	1	2	0	2	2	2	2
Vampirococcoidia	226	1	0	2	2	0	2	2	0	0	0	0	0.444444	1	0	0	1	1	0	0	0	1	0	0	0	0	0	0	0	0	0	0	0	0	0	0	0	2	0	0	0	0	0.4	1	0	0	1	0	0
Vampirococcoidia	228	0	0	0	0	0	1	1	0	0	0	0	0.222222	0	0	0	1	0	0	0	0	0	0	0	0	0	0	0	0	0	0	0	0	0	0	0	0	1	0	0	0	0	0.2	0	0	0	0	0	0
Vampirococcoidia	227	0	0	0	0	0	0	1	0	0	0	0	0.555556	1	0	0	0	2	0	0	0	1	0	0	2	2	0	0	0	0	0	0	0	0	0	0	0	3	0	0	0	0	0.8	1	0	0	1	2	2
Vampirococcoidia	314	0	0	0	0	1	0	0	0	0	0	0	0.888889	2	0	0	1	2	1	0	0	1	0	0	2	2	1	0	0	0	0	0	0	0	0	0	0	2	0	0	0	0	1	2	0	1	1	2	2
Vampirococcoidia	264	1	0	1	1	2	1	1	0	0	0	0	0.333333	1	0	0	1	0	1	0	0	0	0	0	0	0	1	0	0	0	0	0	0	0	0	0	0	0	0	0	0	0	0.2	1	0	1	0	0	0
Vampirococcoidia	262	0	0	0	0	0	0	0	0	0	0	0	0.444444	0	0	0	0	0	2	0	0	2	0	0	0	2	1	0	0	0	0	0	0	0	0	2	0	0	0	0	0	0	0.6	0	0	2	2	0	2
Vampirococcoidia	258	1	0	0	0	2	2	2	0	0	0	0	0.777778	0	0	0	2	2	2	2	0	4	0	0	2	4	2	2	0	0	0	0	0	0	0	0	0	0	0	0	0	0	0.8	0	0	2	4	2	4
Vampirococcoidia	259	1	0	1	1	2	1	1	0	0	0	0	0.777778	2	0	0	2	0	0	0	0	3	0	0	1	2	1	1	0	0	0	1	0	0	0	0	0	1	0	0	0	0	0.8	2	0	0	3	1	2
Vampirococcoidia	238	0	0	0	0	0	0	0	0	0	0	0	0.444444	0	0	0	1	1	0	1	0	0	0	0	2	0	0	0	0	0	0	0	0	0	0	0	0	1	0	0	0	0	0.4	0	0	0	0	2	0
Vampirococcoidia	240	1	0	2	2	3	2	2	0	0	0	0	0.555556	2	0	0	2	0	0	2	0	4	0	0	0	2	0	2	0	0	0	2	0	0	0	0	0	2	0	0	0	0	0.6	2	0	0	4	0	2
Vampirococcoidia	263	0	0	0	0	1	0	0	0	0	0	0	0.444444	1	0	0	0	1	1	0	0	0	0	0	1	0	0	1	0	0	0	0	0	0	0	0	0	1	0	0	0	0	0.6	1	0	1	0	1	0
Vampirococcoidia	272	1	0	1	1	2	1	1	0	0	0	0	0.888889	1	0	0	1	0	0	0	0	2	0	0	2	2	1	0	0	0	0	1	0	0	0	1	0	1	0	0	0	1	0.8	1	0	0	2	2	2
Vampirococcoidia	253	1	0	2	2	3	2	2	0	0	0	0	1	2	0	0	2	1	4	0	0	2	0	2	2	2	2	0	0	0	0	0	0	0	0	2	0	2	0	0	0	0	1	2	0	4	2	2	2
Vampirococcoidia	249	1	0	1	1	1	1	1	0	0	0	0	0.444444	1	0	0	0	1	1	0	0	1	0	0	0	1	0	0	0	0	0	0	0	0	0	0	0	0	0	0	0	0	0.6	1	0	1	1	0	1
Vampirococcoidia	247	1	0	2	2	3	2	2	0	0	0	0	0.777778	2	0	0	4	2	2	0	0	2	0	0	2	2	0	0	0	0	0	0	0	0	0	0	0	2	0	0	0	0	1	2	0	2	2	2	2
Vampirococcoidia	241	1	0	2	2	2	2	2	0	0	0	0	0.777778	2	0	0	0	2	2	0	0	4	2	0	0	4	2	2	0	0	0	2	0	0	0	0	0	2	0	0	0	0	0.8	2	0	2	4	0	4
Vampirococcoidia	260	1	0	2	2	2	2	2	0	0	0	0	0.888889	2	0	0	2	2	0	0	0	2	0	0	2	2	2	0	0	0	0	2	0	0	0	2	0	2	0	0	0	0	0.8	2	0	0	2	2	2
Vampirococcoidia	269	0	0	0	0	1	0	0	0	0	0	0	0.666667	1	0	0	2	0	0	0	0	2	0	0	1	2	1	0	0	0	0	0	0	0	0	1	0	1	0	0	0	0	0.8	1	0	0	2	1	2
Vampirococcoidia	267	1	0	1	1	2	1	0	0	0	0	0	0.666667	1	0	0	1	0	1	0	0	1	0	0	1	0	0	0	0	0	0	1	0	0	0	1	0	1	0	0	0	0	0.8	1	0	1	1	1	0
Vampirococcoidia	265	0	0	0	0	0	0	0	0	0	0	0	0.333333	0	0	0	2	0	0	0	0	0	0	0	0	0	2	0	0	0	0	0	0	0	0	2	0	2	0	0	0	0	0.2	0	0	0	0	0	0
Vampirococcoidia	309	1	0	1	1	1	1	1	0	0	0	0	0.888889	1	0	1	2	1	2	0	0	1	0	0	1	1	2	1	0	0	0	0	0	0	0	1	0	1	0	0	0	0	1	1	0	2	1	1	1
Vampirococcoidia	301	0	0	0	0	1	0	0	0	0	0	0	0.888889	1	0	1	2	1	1	0	0	3	1	0	1	1	0	0	0	0	0	0	0	0	0	0	0	1	0	0	0	0	1	1	0	1	3	1	1
Vampirococcoidia	310	1	0	1	1	1	1	1	0	0	0	0	0.666667	1	0	1	1	0	0	0	0	1	0	0	1	1	1	0	0	0	0	0	0	0	0	0	0	1	0	0	0	0	0.8	1	0	0	1	1	1
Vampirococcoidia	306	1	0	1	1	1	1	1	0	0	0	0	0.888889	1	0	1	2	0	1	0	0	1	1	0	1	1	1	0	0	0	0	0	0	0	0	0	0	0	0	0	0	1	0.8	1	0	1	1	1	1
Vampirococcoidia	305	1	0	1	1	1	0	0	0	0	0	0	0.333333	1	0	0	0	1	0	0	0	0	0	0	1	1	0	0	0	0	0	0	0	0	0	0	0	0	0	0	0	0	0.4	1	0	0	0	1	1
Vampirococcoidia	304	0	0	0	1	1	0	0	0	0	0	0	0.333333	2	0	0	2	0	1	0	0	0	0	0	0	0	2	0	0	0	0	0	0	0	0	0	0	0	0	0	0	0	0.2	2	0	1	0	0	0
Vampirococcoidia	308	1	0	1	1	1	1	1	0	0	0	0	0.555556	2	0	0	1	0	1	0	0	0	0	0	2	1	1	0	0	0	0	0	0	0	0	0	0	0	0	0	0	0	0.6	2	0	1	0	2	1
Vampirococcoidia	307	1	0	1	1	1	1	1	0	0	0	0	0.555556	1	0	0	2	1	0	0	0	2	0	0	0	0	2	1	0	0	0	0	0	0	0	0	0	1	0	0	0	0	0.4	1	0	0	2	0	0
Vampirococcoidia	277	1	0	1	1	1	1	1	0	0	0	0	1	1	0	0	2	1	1	0	0	1	0	1	1	1	1	1	0	0	0	0	0	0	0	0	0	1	0	0	0	0	1	1	0	1	1	1	1
Vampirococcoidia	273	1	0	1	1	1	1	1	0	0	0	0	0.777778	1	0	1	1	0	1	0	0	1	0	0	1	2	1	1	0	0	0	0	0	0	0	0	0	1	0	0	0	0	1	1	0	1	1	1	2
Vampirococcoidia	302	1	0	0	0	1	1	1	0	0	0	0	1	2	0	0	2	1	2	0	0	1	0	1	1	2	1	0	0	0	0	0	0	0	0	0	0	2	0	0	0	0	1	2	0	2	1	1	2
Vampirococcoidia	298	1	0	1	1	1	1	1	0	0	0	0	1	1	0	0	2	1	1	0	0	1	0	1	1	1	1	0	0	0	0	0	0	0	0	0	0	1	0	0	0	0	1	1	0	1	1	1	1
Vampirococcoidia	297	1	0	0	1	1	1	1	0	0	0	0	0.888889	3	0	0	0	1	2	0	0	1	0	1	1	1	1	1	0	0	0	1	0	0	0	0	0	1	0	0	0	0	1	3	0	2	1	1	1
Vampirococcoidia	280	1	0	1	1	1	1	1	0	0	0	0	1	1	0	0	2	1	1	0	0	1	0	1	1	1	1	1	0	0	0	0	0	0	0	0	0	1	0	0	0	0	1	1	0	1	1	1	1
Vampirococcoidia	289	1	0	1	1	1	1	1	0	0	0	0	1	1	0	0	2	1	1	0	0	1	0	1	1	1	1	1	0	0	0	0	0	0	0	0	0	1	0	0	0	0	1	1	0	1	1	1	1
Vampirococcoidia	294	1	0	1	1	0	1	1	0	0	0	0	0.777778	1	0	0	0	1	2	0	0	1	0	1	1	1	0	1	0	0	0	0	0	0	0	0	0	1	0	0	0	0	1	1	0	2	1	1	1
Vampirococcoidia	286	1	0	1	1	1	1	1	0	0	0	0	1	2	0	0	2	1	2	0	0	1	0	1	1	1	1	1	0	0	0	0	0	0	0	0	0	1	0	0	0	1	1	2	0	2	1	1	1
Vampirococcoidia	295	1	0	1	1	1	1	1	0	0	0	0	0.888889	1	0	0	2	1	1	0	0	1	0	1	1	1	0	1	0	0	0	0	0	0	0	0	0	1	0	0	0	0	1	1	0	1	1	1	1
Vampirococcoidia	288	1	0	1	1	1	1	1	0	0	0	0	1	1	0	0	2	1	1	0	0	1	0	1	1	1	1	1	0	0	0	0	0	0	0	0	0	1	0	0	0	0	1	1	0	1	1	1	1
Vampirococcoidia	317	0	0	0	0	1	0	0	0	0	0	0	0.888889	1	0	0	1	2	1	0	0	1	0	0	1	1	1	0	1	0	0	0	0	0	0	0	0	2	0	0	0	0	1	1	0	1	1	1	1
Vampirococcoidia	315	0	0	0	0	0	0	0	0	0	0	0	0.444444	1	0	0	0	0	0	0	0	1	0	0	0	1	0	0	1	0	0	0	0	0	0	0	0	1	0	0	0	0	0.6	1	0	0	1	0	1
Vampirococcoidia	407	0	0	0	0	0	0	0	0	0	0	0	0.777778	1	0	0	1	0	0	0	0	1	0	1	1	1	0	0	1	0	0	0	0	0	0	0	0	1	0	0	0	0	0.8	1	0	0	1	1	1
Vampirococcoidia	417	1	0	1	1	0	1	1	0	0	0	0	0.888889	1	0	0	1	2	1	0	0	1	0	0	1	1	1	0	0	0	0	0	0	0	0	0	0	2	0	0	0	0	1	1	0	1	1	1	1
Vampirococcoidia	418	1	0	1	1	0	1	1	0	0	0	0	0.888889	1	0	0	1	2	1	0	0	1	0	0	1	1	1	0	0	0	0	0	0	0	0	0	0	2	0	0	0	0	1	1	0	1	1	1	1
Vampirococcoidia	415	1	0	1	1	0	1	1	0	0	0	0	0.888889	1	0	0	1	2	1	0	0	1	0	0	1	1	1	0	0	0	0	0	0	0	0	0	0	2	0	0	0	0	1	1	0	1	1	1	1
Vampirococcoidia	408	1	0	2	2	3	2	2	0	0	0	0	0.777778	2	0	0	0	4	2	0	0	2	0	0	2	2	2	0	0	0	0	0	0	0	0	0	0	4	0	0	0	0	1	2	0	2	2	2	2
Vampirococcoidia	405	0	0	0	0	1	0	0	0	0	0	0	0.666667	1	0	0	1	0	0	0	0	1	0	0	2	2	0	0	1	0	0	0	0	0	0	0	0	2	0	0	0	0	0.8	1	0	0	1	2	2
Vampirococcoidia	392	0	0	0	0	0	0	0	0	0	0	0	0.777778	2	0	0	2	3	2	0	0	2	0	0	0	2	0	0	2	0	0	0	0	0	0	0	0	2	0	0	0	0	0.8	2	0	2	2	0	2
Vampirococcoidia	390	0	0	0	0	2	0	0	0	0	0	0	0.888889	2	0	0	2	2	2	0	0	2	0	0	4	4	0	0	2	0	0	0	0	0	0	0	0	4	0	0	0	0	1	2	0	2	2	4	4
Vampirococcoidia	401	0	0	0	0	1	0	0	0	0	0	0	0.888889	2	0	0	1	1	1	0	0	2	0	0	1	1	0	0	1	0	0	0	0	0	0	0	0	1	0	0	0	0	1	2	0	1	2	1	1
Vampirococcoidia	396	0	0	0	0	4	0	0	0	0	0	0	0.777778	2	0	0	2	4	2	0	0	4	0	0	2	5	0	0	0	0	0	0	0	0	0	0	0	4	0	0	0	0	1	2	0	2	4	2	5
Vampirococcoidia	406	0	0	0	0	1	0	0	0	0	0	0	0.888889	1	0	0	1	1	1	0	0	3	0	0	2	1	0	0	0	0	0	0	0	0	0	1	0	2	1	0	0	0	1	1	0	1	3	2	1
Vampirococcoidia	318	0	0	0	0	1	0	0	0	0	0	0	0.777778	1	0	0	1	2	0	0	0	1	0	0	1	1	1	0	0	0	0	0	0	0	0	0	0	1	1	0	0	0	0.8	1	0	0	1	1	1
Vampirococcoidia	389	0	0	0	0	0	0	0	0	0	0	0	0.222222	0	0	0	0	0	0	0	0	1	0	0	1	1	0	0	0	0	0	0	0	0	0	0	0	0	0	0	0	0	0.4	0	0	0	1	1	1
Vampirococcoidia	388	0	0	0	0	1	0	0	0	0	0	0	0.555556	2	0	0	0	1	0	0	0	2	0	0	1	2	0	0	0	0	0	0	0	0	0	0	0	3	0	0	0	0	0.8	2	0	0	2	1	2
Vampirococcoidia	387	0	0	0	0	1	0	0	0	0	0	0	0.777778	1	0	0	1	0	1	0	0	1	0	0	1	1	0	0	1	0	0	0	0	0	0	0	0	3	1	0	0	0	1	1	0	1	1	1	1
Vampirococcoidia	385	0	0	0	0	1	0	0	0	0	0	0	0.888889	1	0	0	1	1	1	0	0	1	0	0	1	1	0	0	0	0	0	0	0	0	0	0	0	2	1	0	0	0	1	1	0	1	1	1	1
Vampirococcoidia	360	0	0	0	0	1	0	0	0	0	0	0	0.888889	1	0	0	1	1	1	0	0	1	0	0	1	1	0	0	0	0	0	0	0	0	0	0	0	2	1	0	0	0	1	1	0	1	1	1	1
Vampirococcoidia	361	0	0	1	0	1	1	0	0	0	0	0	0.555556	0	0	0	0	2	0	0	0	1	0	0	1	2	0	0	0	0	0	0	0	0	0	0	0	2	1	0	0	0	0.6	0	0	0	1	1	2
Vampirococcoidia	359	0	0	0	0	1	0	0	0	0	0	0	0.666667	2	0	0	0	2	0	0	0	1	0	0	1	1	0	0	0	0	0	0	0	0	0	0	0	2	1	0	0	0	0.8	2	0	0	1	1	1
Vampirococcoidia	340	0	0	0	0	1	0	0	0	0	0	0	0.888889	1	0	0	1	2	1	0	0	1	0	0	1	1	1	0	0	0	0	0	0	0	0	0	0	2	1	0	0	0	1	1	0	1	1	1	1
Vampirococcoidia	345	0	0	0	0	0	0	0	0	0	0	0	0.555556	0	0	0	1	1	0	0	0	0	0	0	1	0	0	0	0	0	0	0	0	0	0	0	0	2	1	0	0	0	0.4	0	0	0	0	1	0
Vampirococcoidia	338	1	0	1	0	1	1	1	0	0	0	0	0.888889	1	0	1	2	2	1	0	0	1	0	0	1	1	0	0	0	0	0	0	0	0	0	0	0	2	1	0	0	1	1	1	0	1	1	1	1
Vampirococcoidia	366	1	0	1	1	0	1	1	0	0	0	0	0.888889	1	0	0	1	0	1	0	0	1	0	0	1	1	2	0	0	0	0	1	0	0	0	0	0	1	0	0	0	0	1	1	0	1	1	1	1
Vampirococcoidia	367	1	0	1	1	1	1	1	0	0	0	0	0.888889	1	0	0	1	2	2	0	0	1	0	0	1	2	0	1	1	0	0	0	0	0	0	0	0	2	0	0	0	1	1	1	0	2	1	1	2
Vampirococcoidia	365	0	0	0	0	1	0	0	0	0	0	0	0.777778	1	0	1	0	1	1	0	0	1	0	0	0	1	0	1	0	0	0	0	0	0	0	0	0	1	1	0	0	0	0.8	1	0	1	1	0	1
Vampirococcoidia	337	0	0	0	0	0	0	0	0	0	0	0	0.555556	1	0	1	0	0	0	0	0	1	0	0	1	1	0	1	0	0	0	0	0	0	0	0	0	1	0	0	0	0	0.8	1	0	0	1	1	1
Vampirococcoidia	364	0	0	0	0	1	0	0	0	0	0	0	0.777778	1	0	0	0	1	1	0	0	2	0	0	2	3	1	0	0	0	0	0	0	0	0	0	0	1	0	0	0	0	1	1	0	1	2	2	3
Vampirococcoidia	380	0	0	0	0	0	0	0	0	0	0	0	0.888889	1	0	0	1	2	1	0	0	1	0	0	1	1	1	1	0	0	0	0	0	0	0	0	0	1	0	0	0	0	1	1	0	1	1	1	1
Vampirococcoidia	377	0	0	0	0	0	0	0	0	0	0	0	0.777778	1	0	0	1	2	0	0	0	2	0	0	1	1	1	1	0	0	0	0	0	0	0	0	0	1	0	0	0	0	0.8	1	0	0	2	1	1
Vampirococcoidia	336	0	0	0	0	1	0	0	0	0	0	0	0.777778	1	0	0	1	1	0	0	0	2	0	0	1	1	0	0	1	0	0	0	0	0	0	0	0	1	0	0	0	0	0.8	1	0	0	2	1	1
Vampirococcoidia	362	0	0	0	0	2	0	0	0	0	0	0	0.777778	2	0	0	0	2	2	0	0	2	0	0	2	2	0	0	0	0	0	0	0	0	0	0	0	4	2	0	0	0	1	2	0	2	2	2	2
Vampirococcoidia	347	0	0	0	0	1	0	0	0	0	0	0	0.777778	1	0	0	1	1	0	0	0	1	0	0	2	1	0	0	1	0	0	0	0	0	0	1	0	2	0	0	0	0	0.8	1	0	0	1	2	1
Vampirococcoidia	346	0	0	0	0	1	0	0	0	0	0	0	0.555556	0	0	0	1	1	0	0	0	1	0	0	1	0	0	0	0	0	0	0	0	0	0	0	0	1	1	0	0	0	0.4	0	0	0	1	1	0
Vampirococcoidia	348	0	0	0	0	1	0	0	0	0	0	0	0.666667	0	0	0	1	1	1	0	0	0	0	0	1	0	0	0	1	0	0	0	0	0	0	1	0	2	1	0	0	0	0.6	0	0	1	0	1	0
Vampirococcoidia	350	0	0	0	0	1	0	0	0	0	0	0	0.888889	1	0	0	1	1	1	0	0	1	0	0	1	1	1	1	0	0	0	0	0	0	0	0	0	1	0	0	0	0	1	1	0	1	1	1	1
Vampirococcoidia	320	0	0	0	0	2	0	0	0	0	0	0	0.444444	0	0	0	2	0	0	0	0	0	0	0	2	0	0	0	0	0	0	0	0	0	0	0	0	4	2	0	0	0	0.4	0	0	0	0	2	0
Vampirococcoidia	344	0	0	0	0	0	0	0	0	0	0	0	0.777778	4	0	0	2	0	4	0	0	2	0	0	2	2	0	0	0	0	0	0	0	0	0	0	0	4	2	0	0	0	1	4	0	4	2	2	2
Vampirococcoidia	374	0	0	0	0	2	0	0	0	0	0	0	0.888889	2	0	0	2	2	2	0	0	2	0	0	2	2	0	0	0	0	0	0	0	0	0	0	0	2	2	0	0	0	1	2	0	2	2	2	2
Vampirococcoidia	363	0	0	0	0	0	0	0	0	0	0	0	0.666667	2	0	0	0	3	0	0	0	2	0	0	2	2	0	0	0	0	0	0	0	0	0	0	0	2	2	0	0	0	0.8	2	0	0	2	2	2
Vampirococcoidia	341	0	0	0	0	2	0	0	0	0	0	0	0.444444	2	0	0	0	1	2	0	0	0	0	0	2	0	0	0	0	0	0	0	0	0	0	0	0	6	0	0	0	2	0.6	2	0	2	0	2	0
Vampirococcoidia	343	0	0	0	0	0	0	0	0	0	0	0	0.333333	0	0	0	0	1	1	0	0	0	0	0	0	0	0	0	1	0	0	0	0	0	0	0	0	0	0	0	0	0	0.2	0	0	1	0	0	0
Vampirococcoidia	349	0	0	0	0	2	0	0	0	0	0	0	0.444444	0	0	0	2	2	0	0	0	0	0	0	2	0	2	0	0	0	0	0	0	0	0	0	0	0	0	0	0	0	0.2	0	0	0	0	2	0
Vampirococcoidia	342	0	0	0	0	1	0	0	0	0	0	0	0.888889	1	0	0	1	2	1	0	0	1	0	0	2	1	0	0	0	0	0	0	0	0	0	0	0	2	1	0	0	0	1	1	0	1	1	2	1
Vampirococcoidia	376	1	0	1	1	1	1	1	0	0	0	0	0.777778	1	0	0	1	1	0	0	0	1	0	0	1	1	1	0	0	0	0	0	0	0	0	0	0	2	0	0	0	0	0.8	1	0	0	1	1	1
Vampirococcoidia	368	0	0	0	0	0	0	0	0	0	0	0	0.666667	2	0	0	0	1	1	0	0	1	0	0	3	1	0	0	0	0	0	0	0	0	0	0	0	1	0	0	0	0	1	2	0	1	1	3	1
Vampirococcoidia	369	0	0	0	0	1	0	0	0	0	0	0	0.777778	1	0	0	1	0	1	0	0	1	0	0	3	1	1	0	0	0	0	0	0	0	0	0	0	3	0	0	0	0	1	1	0	1	1	3	1
Vampirococcoidia	333	0	0	0	0	1	0	0	0	0	0	0	0.777778	2	0	0	1	0	1	0	0	2	0	1	0	3	1	1	0	0	0	0	0	0	0	1	0	1	0	0	0	0	0.8	2	0	1	2	0	3
Vampirococcoidia	330	1	0	1	1	1	1	1	0	0	0	0	0.777778	1	0	0	2	1	0	0	0	1	0	0	1	1	1	1	0	0	0	0	0	0	0	0	0	1	0	0	0	0	0.8	1	0	0	1	1	1
Vampirococcoidia	329	1	0	1	1	1	1	1	0	0	0	0	0.888889	1	0	0	1	1	1	0	0	1	0	0	1	1	1	1	0	0	0	0	0	0	0	0	0	1	0	0	0	0	1	1	0	1	1	1	1
Vampirococcoidia	334	1	0	1	1	1	1	1	0	0	0	0	0.777778	1	0	0	1	1	0	0	0	1	0	0	1	1	1	1	0	0	0	0	0	0	0	0	0	1	0	0	0	0	0.8	1	0	0	1	1	1
Vampirococcoidia	331	1	0	2	2	2	2	2	0	0	0	0	0.777778	2	0	0	2	0	2	0	0	2	0	0	2	2	2	2	0	0	0	0	0	0	0	0	0	2	0	0	0	0	1	2	0	2	2	2	2
Vampirococcoidia	324	1	0	2	2	3	2	2	0	0	0	0	0.777778	2	0	0	4	3	0	0	0	2	0	0	2	2	2	2	0	0	0	0	0	0	0	0	0	2	0	0	0	0	0.8	2	0	0	2	2	2
Vampirococcoidia	325	0	0	0	2	0	2	2	0	0	0	0	0.555556	4	0	0	0	2	0	0	0	2	0	0	2	2	0	2	0	0	0	0	0	0	0	0	0	2	0	0	0	0	0.8	4	0	0	2	2	2
Module Definitions
md:GCS	Glycine cleavage system	((K00281,(K00282+K00283)),(K00382+K00605+K02437))	GCS	GCS : Glycine cleavage system
md:GDC	Glycine synthesis from glyoxylate	(K14272,K00827,K00830)	GDC	GDC : Glycine synthesis from glyoxylate
md:M00001	Glycolysis (Embden-Meyerhof pathway), glucose => pyruvate	(K00844,K12407,K00845,K00886,K08074,K00918) (K01810,K06859,K13810,K15916) (K00850,K16370,K00918) (K01623,K01624,K11645,K16305,K16306) K01803 ((K00134,K00150) K00927,K11389) (K01834,K15633,K15634,K15635) K01689 (K00873,K12406)	M00001	M00001 : Glycolysis (Embden-Meyerhof pathway), glucose => pyruvate
md:M00002	Glycolysis, core module involving three-carbon compounds	K01803 ((K00134,K00150) K00927,K11389) (K01834,K15633,K15634,K15635) K01689 (K00873,K12406)	M00002	M00002 : Glycolysis, core module involving three-carbon compounds
md:M00003	Gluconeogenesis, oxaloacetate => fructose-6P	(K01596,K01610) K01689 (K01834,K15633,K15634,K15635) K00927 (K00134,K00150) K01803 ((K01623,K01624,K11645) (K03841,K02446,K11532,K01086,K04041),K01622)	M00003	M00003 : Gluconeogenesis, oxaloacetate => fructose-6P
md:M00004	Pentose phosphate pathway (Pentose phosphate cycle)	(K13937,((K00036,K19243) (K01057,K07404))) K00033 K01783 (K01807,K01808) K00615 K00616 (K01810,K06859,K13810,K15916)	M00004	M00004 : Pentose phosphate pathway (Pentose phosphate cycle)
md:M00005	PRPP biosynthesis, ribose 5P => PRPP	K00948	M00005	M00005 : PRPP biosynthesis, ribose 5P => PRPP
md:M00006	Pentose phosphate pathway, oxidative phase, glucose 6P => ribulose 5P	(K13937,((K00036,K19243) (K01057,K07404))) K00033	M00006	M00006 : Pentose phosphate pathway, oxidative phase, glucose 6P => ribulose 5P
md:M00007	Pentose phosphate pathway, non-oxidative phase, fructose 6P => ribose 5P	K00615 (K00616,K13810) K01783 (K01807,K01808)	M00007	M00007 : Pentose phosphate pathway, non-oxidative phase, fructose 6P => ribose 5P
md:M00008	Entner-Doudoroff pathway, glucose-6P => glyceraldehyde-3P + pyruvate	K00036 (K01057,K07404) K01690 K01625	M00008	M00008 : Entner-Doudoroff pathway, glucose-6P => glyceraldehyde-3P + pyruvate
md:M00009	Citrate cycle (TCA cycle, Krebs cycle)	(K01647,K05942) (K01681,K01682) (K00031,K00030) (K00164+K00658+K00382,K00174+K00175-K00177-K00176) (K01902+K01903,K01899+K01900,K18118) (K00234+K00235+K00236+K00237,K00239+K00240+K00241-(K00242,K18859,K18860),K00244+K00245+K00246-K00247) (K01676,K01679,K01677+K01678) (K00026,K00025,K00024,K00116)	M00009	M00009 : Citrate cycle (TCA cycle, Krebs cycle)
md:M00010	Citrate cycle, first carbon oxidation, oxaloacetate => 2-oxoglutarate	(K01647,K05942) (K01681,K01682) (K00031,K00030)	M00010	M00010 : Citrate cycle, first carbon oxidation, oxaloacetate => 2-oxoglutarate
md:M00011	Citrate cycle, second carbon oxidation, 2-oxoglutarate => oxaloacetate	(K00164+K00658+K00382,K00174+K00175-K00177-K00176) (K01902+K01903,K01899+K01900,K18118) (K00234+K00235+K00236+K00237,K00239+K00240+K00241-(K00242,K18859,K18860),K00244+K00245+K00246-K00247) (K01676,K01679,K01677+K01678) (K00026,K00025,K00024,K00116)	M00011	M00011 : Citrate cycle, second carbon oxidation, 2-oxoglutarate => oxaloacetate
md:M00012	Glyoxylate cycle	K01647 (K01681,K01682) K01637 (K01638,K19282) (K00026,K00025,K00024)	M00012	M00012 : Glyoxylate cycle
md:M00013	Malonate semialdehyde pathway, propanoyl-CoA => acetyl-CoA	(K00248,K00232) (K07511,K07514,K07515,K14729) K05605 K23146 K00140	M00013	M00013 : Malonate semialdehyde pathway, propanoyl-CoA => acetyl-CoA
md:M00014	Glucuronate pathway (uronate pathway)	K00012 ((K12447 K16190),(K00699 (K01195,K14756))) K00002 K13247 -- K03331 (K05351,K00008) K00854	M00014	M00014 : Glucuronate pathway (uronate pathway)
md:M00015	Proline biosynthesis, glutamate => proline	((K00931 K00147),K12657) K00286	M00015	M00015 : Proline biosynthesis, glutamate => proline
md:M00016	Lysine biosynthesis, succinyl-DAP pathway, aspartate => lysine	(K00928,K12524,K12525,K12526) K00133 K01714 K00215 K00674 (K00821,K14267) K01439 K01778 (K01586,K12526)	M00016	M00016 : Lysine biosynthesis, succinyl-DAP pathway, aspartate => lysine
md:M00017	Methionine biosynthesis, apartate => homoserine => methionine	(K00928,K12524,K12525) K00133 (K00003,K12524,K12525) (K00651,K00641) K01739 (K01760,K14155) (K00548,K24042,K00549)	M00017	M00017 : Methionine biosynthesis, apartate => homoserine => methionine
md:M00018	Threonine biosynthesis, aspartate => homoserine => threonine	(K00928,K12524,K12525,K12526) K00133 (K00003,K12524,K12525) (K00872,K02204,K02203) K01733	M00018	M00018 : Threonine biosynthesis, aspartate => homoserine => threonine
md:M00019	Valine/isoleucine biosynthesis, pyruvate => valine / 2-oxobutanoate => isoleucine	K01652+(K01653,K11258) K00053 K01687 K00826	M00019	M00019 : Valine/isoleucine biosynthesis, pyruvate => valine / 2-oxobutanoate => isoleucine
md:M00020	Serine biosynthesis, glycerate-3P => serine	K00058 K00831 (K01079,K02203,K22305)	M00020	M00020 : Serine biosynthesis, glycerate-3P => serine
md:M00021	Cysteine biosynthesis, serine => cysteine	(K00640,K23304) (K01738,K13034,K17069)	M00021	M00021 : Cysteine biosynthesis, serine => cysteine
md:M00022	Shikimate pathway, phosphoenolpyruvate + erythrose-4P => chorismate	(K01626,K03856,K13853) (((K01735,K13829) ((K03785,K03786) K00014,K13832)),K13830) ((K00891,K13829) (K00800,K24018),K13830) K01736	M00022	M00022 : Shikimate pathway, phosphoenolpyruvate + erythrose-4P => chorismate
md:M00023	Tryptophan biosynthesis, chorismate => tryptophan	(((K01657+K01658,K13503,K13501,K01656) K00766),K13497) (((K01817,K24017) (K01656,K01609)),K13498,K13501) (K01695+(K01696,K06001),K01694)	M00023	M00023 : Tryptophan biosynthesis, chorismate => tryptophan
md:M00024	Phenylalanine biosynthesis, chorismate => phenylalanine	((K01850,K04092,K14187,K04093,K04516,K06208,K06209,K13853) (K01713,K04518,K05359),K14170) (K00832,K00838)	M00024	M00024 : Phenylalanine biosynthesis, chorismate => phenylalanine
md:M00025	Tyrosine biosynthesis, chorismate => tyrosine	(((K01850,K04092,K14170,K04093,K04516,K06208,K06209,K13853) K04517),K14187) (K00815,K00832,K00838)	M00025	M00025 : Tyrosine biosynthesis, chorismate => tyrosine
md:M00026	Histidine biosynthesis, PRPP => histidine	(K00765-K02502) (K01523 K01496,K11755,K14152) (K01814,K24017) (K02501+K02500,K01663) ((K01693 K00817 (K04486,K05602,K18649)),(K01089 K00817)) (K00013,K14152)	M00026	M00026 : Histidine biosynthesis, PRPP => histidine
md:M00027	GABA (gamma-Aminobutyrate) shunt	K01580 (K13524,K07250,K00823,K16871) (K00135,K00139,K17761)	M00027	M00027 : GABA (gamma-Aminobutyrate) shunt
md:M00028	Ornithine biosynthesis, glutamate => ornithine	(K00618,K00619,K14681,K14682,K00620,K22477,K22478) ((K00930,K22478) K00145,K12659) (K00818,K00821) (K01438,K14677,K00620)	M00028	M00028 : Ornithine biosynthesis, glutamate => ornithine
md:M00029	Urea cycle	K01948 K00611 K01940 (K01755,K14681) K01476	M00029	M00029 : Urea cycle
md:M00030	Lysine biosynthesis, AAA pathway, 2-oxoglutarate => 2-aminoadipate => lysine	K01655 K17450 K01705 K05824 K00838 K00143 (K00293,K24034) K00290	M00030	M00030 : Lysine biosynthesis, AAA pathway, 2-oxoglutarate => 2-aminoadipate => lysine
md:M00031	Lysine biosynthesis, mediated by LysW, 2-aminoadipate => lysine	K05826	M00031	M00031 : Lysine biosynthesis, mediated by LysW, 2-aminoadipate => lysine
md:M00032	Lysine degradation, lysine => saccharopine => acetoacetyl-CoA	K14157 K14085 K00825 (K15791+K00658+K00382) K00252 (K07514,(K07515,K07511) K00022)	M00032	M00032 : Lysine degradation, lysine => saccharopine => acetoacetyl-CoA
md:M00033	Ectoine biosynthesis, aspartate => ectoine	K00928 K00133 K00836 K06718 K06720	M00033	M00033 : Ectoine biosynthesis, aspartate => ectoine
md:M00034	Methionine salvage pathway	K00789 K01611 K00797 ((K01243,K01244) K00899,K00772) K08963 (K16054,K08964 (K09880,K08965 K08966)) K08967 (K00815,K08969,K23977,K00832,K00838)	M00034	M00034 : Methionine salvage pathway
md:M00035	Methionine degradation	K00789 (K00558,K17398,K17399) K01251 (K01697,K10150)	M00035	M00035 : Methionine degradation
md:M00036	Leucine degradation, leucine => acetoacetate + acetyl-CoA	K00826 ((K00166+K00167,K11381)+K09699+K00382) (K00253,K00249) (K01968+K01969) (K05607,K13766) K01640	M00036	M00036 : Leucine degradation, leucine => acetoacetate + acetyl-CoA
md:M00037	Melatonin biosynthesis, tryptophan => serotonin => melatonin	K00502 K01593 K00669 K00543	M00037	M00037 : Melatonin biosynthesis, tryptophan => serotonin => melatonin
md:M00038	Tryptophan metabolism, tryptophan => kynurenine => 2-aminomuconate	(K00453,K00463) (K01432,K14263,K07130) K00486 K01556 K00452 K03392 (K10217,K23234)	M00038	M00038 : Tryptophan metabolism, tryptophan => kynurenine => 2-aminomuconate
md:M00039	Monolignol biosynthesis, phenylalanine/tyrosine => monolignol	(K10775,K13064) K00487 K01904 K13065 K09754 K00588 K09753 K09755 K13066 (K00083,K22395)	M00039	M00039 : Monolignol biosynthesis, phenylalanine/tyrosine => monolignol
md:M00040	Tyrosine biosynthesis, prephanate => pretyrosine => tyrosine	(K00832,K15849) (K00220,K24018,K15226,K15227)	M00040	M00040 : Tyrosine biosynthesis, prephanate => pretyrosine => tyrosine
md:M00042	Catecholamine biosynthesis, tyrosine => dopamine => noradrenaline => adrenaline	(K00505,K00501) (K01592,K01593) K00503 K00553	M00042	M00042 : Catecholamine biosynthesis, tyrosine => dopamine => noradrenaline => adrenaline
md:M00043	Thyroid hormone biosynthesis, tyrosine => triiodothyronine/thyroxine	K00431	M00043	M00043 : Thyroid hormone biosynthesis, tyrosine => triiodothyronine/thyroxine
md:M00044	Tyrosine degradation, tyrosine => homogentisate	(K00815,K00838,K03334) K00457 K00451 K01800 (K01555,K16171)	M00044	M00044 : Tyrosine degradation, tyrosine => homogentisate
md:M00045	Histidine degradation, histidine => N-formiminoglutamate => glutamate	K01745 K01712 K01468 (K01479,K00603,K13990,(K05603 K01458))	M00045	M00045 : Histidine degradation, histidine => N-formiminoglutamate => glutamate
md:M00046	Pyrimidine degradation, uracil => beta-alanine, thymine => 3-aminoisobutanoate	(K00207,K17722+K17723) K01464 (K01431,K06016)	M00046	M00046 : Pyrimidine degradation, uracil => beta-alanine, thymine => 3-aminoisobutanoate
md:M00047	Creatine pathway	K00613 K00542 K00933	M00047	M00047 : Creatine pathway
md:M00048	Inosine monophosphate biosynthesis, PRPP + glutamine => IMP	K00764 (K01945,K11787,K11788,K13713) (K00601,K11175,K08289,K11787,K01492) (K01952,(K23269+K23264+K23265),(K23270+K23265)) (K01933,K11787,K11788 (K01587,K11808,K01589 K01588)) (K01923,K01587,K13713) K01756 (K00602,(K01492,K06863 K11176))	M00048	M00048 : Inosine monophosphate biosynthesis, PRPP + glutamine => IMP
md:M00049	Adenine ribonucleotide biosynthesis, IMP => ADP,ATP	K01939 K01756 (K00939,K18532,K18533,K00944) (K00940,K00873,K12406)	M00049	M00049 : Adenine ribonucleotide biosynthesis, IMP => ADP,ATP
md:M00050	Guanine ribonucleotide biosynthesis IMP => GDP,GTP	K00088 K01951 K00942 (K00940,K18533,K00873,K12406)	M00050	M00050 : Guanine ribonucleotide biosynthesis IMP => GDP,GTP
md:M00051	Uridine monophosphate biosynthesis, glutamine (+ PRPP) => UMP	(K11540,(K11541 K01465),((K01954,K01955+K01956) (K00609+K00610,K00608) K01465)) (K00226,K00254,K17828) (K13421,K00762 K01591)	M00051	M00051 : Uridine monophosphate biosynthesis, glutamine (+ PRPP) => UMP
md:M00052	Pyrimidine ribonucleotide biosynthesis, UMP => UDP/UTP,CDP/CTP	(K13800,K13809,K09903) (K00940,K18533) K01937	M00052	M00052 : Pyrimidine ribonucleotide biosynthesis, UMP => UDP/UTP,CDP/CTP
md:M00053	Pyrimidine deoxyribonuleotide biosynthesis, CDP/CTP => dCDP/dCTP,dTDP/dTTP	(K00524,K00525+K00526,K10807+K10808) (K00940,K18533) (K00527,K21636) K01494 K01520 (K00560,K13998) K00943 K00940	M00053	M00053 : Pyrimidine deoxyribonuleotide biosynthesis, CDP/CTP => dCDP/dCTP,dTDP/dTTP
md:M00055	N-glycan precursor biosynthesis	K01001 (K07432+K07441) K03842 K03843 K03844 K03845 K03846 K03847 K03846 K00729 K03848 K03849 K03850	M00055	M00055 : N-glycan precursor biosynthesis
md:M00056	O-glycan biosynthesis, mucin type core	K00710 (K00731,K09653) (K00727,K09662,K09663) K00739	M00056	M00056 : O-glycan biosynthesis, mucin type core
md:M00057	Glycosaminoglycan biosynthesis, linkage tetrasaccharide	K00771 K00733 K00734 K10158	M00057	M00057 : Glycosaminoglycan biosynthesis, linkage tetrasaccharide
md:M00058	Glycosaminoglycan biosynthesis, chondroitin sulfate backbone	K00746 (K13499,K00747,K03419)	M00058	M00058 : Glycosaminoglycan biosynthesis, chondroitin sulfate backbone
md:M00059	Glycosaminoglycan biosynthesis, heparan sulfate backbone	(K02369,K02370) (K02366,K02367) (K02368,K02370) (K02576,K02577,K02578,K02579) K01793	M00059	M00059 : Glycosaminoglycan biosynthesis, heparan sulfate backbone
md:M00060	KDO2-lipid A biosynthesis, Raetz pathway, LpxL-LpxM type	K00677 K02535 K02536 K03269 K00748 K00912 K02527 K02517 K02560	M00060	M00060 : KDO2-lipid A biosynthesis, Raetz pathway, LpxL-LpxM type
md:M00061	D-Glucuronate degradation, D-glucuronate => pyruvate + D-glyceraldehyde 3P	K01812 K00040 (K01686,K08323) K00874 (K01625,K17463)	M00061	M00061 : D-Glucuronate degradation, D-glucuronate => pyruvate + D-glyceraldehyde 3P
md:M00063	CMP-KDO biosynthesis	K06041 K01627 K03270 K00979	M00063	M00063 : CMP-KDO biosynthesis
md:M00064	ADP-L-glycero-D-manno-heptose biosynthesis	K03271 (K03272,K21344) K03273 (K03272,K21345) K03274	M00064	M00064 : ADP-L-glycero-D-manno-heptose biosynthesis
md:M00065	GPI-anchor biosynthesis, core oligosaccharide	(K03857+K03859+K03858+K03861+K03860+(K11001,K11002)-K09658) K03434 K05283 (K05284+K07541) K07542 K05285 K05286 (K05288+K05287)	M00065	M00065 : GPI-anchor biosynthesis, core oligosaccharide
md:M00066	Lactosylceramide biosynthesis	K00720 K07553	M00066	M00066 : Lactosylceramide biosynthesis
md:M00067	Sulfoglycolipids biosynthesis, ceramide/1-alkyl-2-acylglycerol => sulfatide/seminolipid	K04628 K01019	M00067	M00067 : Sulfoglycolipids biosynthesis, ceramide/1-alkyl-2-acylglycerol => sulfatide/seminolipid
md:M00068	Glycosphingolipid biosynthesis, globo-series, LacCer => Gb4Cer	K01988 K00719	M00068	M00068 : Glycosphingolipid biosynthesis, globo-series, LacCer => Gb4Cer
md:M00069	Glycosphingolipid biosynthesis, ganglio series, LacCer => GT3	K03370 (K03371,K03369)	M00069	M00069 : Glycosphingolipid biosynthesis, ganglio series, LacCer => GT3
md:M00070	Glycosphingolipid biosynthesis, lacto-series, LacCer => Lc4Cer	K03766 (K07819,K07820,K03877)	M00070	M00070 : Glycosphingolipid biosynthesis, lacto-series, LacCer => Lc4Cer
md:M00071	Glycosphingolipid biosynthesis, neolacto-series, LacCer => nLc4Cer	K03766 (K07966,K07967,K07968,K07969)	M00071	M00071 : Glycosphingolipid biosynthesis, neolacto-series, LacCer => nLc4Cer
md:M00072	N-glycosylation by oligosaccharyltransferase	K07151+K12666+K12667+K12668+K12669+K12670-K00730-K12691	M00072	M00072 : N-glycosylation by oligosaccharyltransferase
md:M00073	N-glycan precursor trimming	K01228 K05546 K23741 K01230	M00073	M00073 : N-glycan precursor trimming
md:M00074	N-glycan biosynthesis, high-mannose type	K05546 K23741 K01230 K05528 K05529+K05530 K05529+K05531+K05532+K05533+K05534 K05535	M00074	M00074 : N-glycan biosynthesis, high-mannose type
md:M00075	N-glycan biosynthesis, complex type	K01231 K00736	M00075	M00075 : N-glycan biosynthesis, complex type
md:M00076	Dermatan sulfate degradation	-- K01136 K01217 K01135 K01197 K01195	M00076	M00076 : Dermatan sulfate degradation
md:M00077	Chondroitin sulfate degradation	K01135 K01197 K01195 K01132	M00077	M00077 : Chondroitin sulfate degradation
md:M00078	Heparan sulfate degradation	(K07964,K07965) K01136 K01217 K01565 K10532 K01205 -- K01195 K01137	M00078	M00078 : Heparan sulfate degradation
md:M00079	Keratan sulfate degradation	-- K01132 K12309 K01137 K12373	M00079	M00079 : Keratan sulfate degradation
md:M00081	Pectin degradation	K01051 K01184 K01213	M00081	M00081 : Pectin degradation
md:M00082	Fatty acid biosynthesis, initiation	(K11262,(K02160+K01961,K11263)+(K01962+K01963,K18472)) (K00665,K00667+K00668,K11533,(K00645 (K00648,K18473)))	M00082	M00082 : Fatty acid biosynthesis, initiation
md:M00083	Fatty acid biosynthesis, elongation	K00665,(K00667 K00668),K11533,((K00647,K09458) K00059 (K02372,K01716,K16363) (K00208,K02371,K10780,K00209))	M00083	M00083 : Fatty acid biosynthesis, elongation
md:M00085	Fatty acid elongation in mitochondria	(K07508,K07509) (K00022 K07511,K07515) K07512	M00085	M00085 : Fatty acid elongation in mitochondria
md:M00086	beta-Oxidation, acyl-CoA synthesis	K01897,K15013	M00086	M00086 : beta-Oxidation, acyl-CoA synthesis
md:M00087	beta-Oxidation	(K00232,K00249,K00255,K06445,K09479) (((K01692,K07511,K13767) (K00022,K07516)),K01825,K01782,K07514,K07515,K10527) (K00632,K07508,K07509,K07513)	M00087	M00087 : beta-Oxidation
md:M00088	Ketone body biosynthesis, acetyl-CoA => acetoacetate/3-hydroxybutyrate/acetone	K00626 K01641 K01640	M00088	M00088 : Ketone body biosynthesis, acetyl-CoA => acetoacetate/3-hydroxybutyrate/acetone
md:M00089	Triacylglycerol biosynthesis	((K00629,K13506,K13507,K00630,K13508,K00631),(K03621 K08591)) (K00655,K13509,K13523,K19007,K13513,K13517,K13519,K14674,K22831) (K01080,K15728,K18693) (K11155,K11160,K14456,K22848,K22849,K00635,K18851)	M00089	M00089 : Triacylglycerol biosynthesis
md:M00090	Phosphatidylcholine (PC) biosynthesis, choline => PC	(K00866,K14156) K00968 (K00994,K13644)	M00090	M00090 : Phosphatidylcholine (PC) biosynthesis, choline => PC
md:M00091	Phosphatidylcholine (PC) biosynthesis, PE => PC	K00551,(K16369 K00550),K00570	M00091	M00091 : Phosphatidylcholine (PC) biosynthesis, PE => PC
md:M00092	Phosphatidylethanolamine (PE) biosynthesis, ethanolamine => PE	(K00894,K14156) K00967 (K00993,K13644)	M00092	M00092 : Phosphatidylethanolamine (PE) biosynthesis, ethanolamine => PE
md:M00093	Phosphatidylethanolamine (PE) biosynthesis, PA => PS => PE	K00981 (K00998,K17103) K01613	M00093	M00093 : Phosphatidylethanolamine (PE) biosynthesis, PA => PS => PE
md:M00094	Ceramide biosynthesis	K00654 K04708 (K04709,K04710,K23727) K04712	M00094	M00094 : Ceramide biosynthesis
md:M00095	C5 isoprenoid biosynthesis, mevalonate pathway	K00626 K01641 K00021 K00869 (K00938,K13273) K01597 K01823	M00095	M00095 : C5 isoprenoid biosynthesis, mevalonate pathway
md:M00096	C5 isoprenoid biosynthesis, non-mevalonate pathway	K01662 K00099 (K00991,K12506) K00919 (K01770,K12506) K03526 K03527 K01823	M00096	M00096 : C5 isoprenoid biosynthesis, non-mevalonate pathway
md:M00097	beta-Carotene biosynthesis, GGAP => beta-carotene	K02291 K02293 K15744 K00514 K09835 K06443	M00097	M00097 : beta-Carotene biosynthesis, GGAP => beta-carotene
md:M00098	Acylglycerol degradation	(K01046,K12298,K16816,K13534,K14073,K14074,K14075,K14076,K22283,K14452,K22284,K14674,K14675,K17900) K01054	M00098	M00098 : Acylglycerol degradation
md:M00099	Sphingosine biosynthesis	K00654 K04708 (K04709,K04710,K23727) K04712 (K01441,K12348,K12349)	M00099	M00099 : Sphingosine biosynthesis
md:M00100	Sphingosine degradation	K04718 K01634	M00100	M00100 : Sphingosine degradation
md:M00101	Cholesterol biosynthesis, squalene 2,3-epoxide => cholesterol	K01852 K05917 K00222 K07750 K07748 (K09827,K13373) K09828 K01824 K00227 K00213	M00101	M00101 : Cholesterol biosynthesis, squalene 2,3-epoxide => cholesterol
md:M00102	Ergocalciferol biosynthesis	K00559 K09829 K00227 K09831 K00223	M00102	M00102 : Ergocalciferol biosynthesis
md:M00103	Cholecalciferol biosynthesis	K07419 K07438	M00103	M00103 : Cholecalciferol biosynthesis
md:M00104	Bile acid biosynthesis, cholesterol => cholate/chenodeoxycholate	K00489 K12408 K07431 K00251 K00037 K00488 K08748 K01796 K10214 K12405 K08764 K11992	M00104	M00104 : Bile acid biosynthesis, cholesterol => cholate/chenodeoxycholate
md:M00106	Conjugated bile acid biosynthesis, cholate => taurocholate/glycocholate	K08748 K00659	M00106	M00106 : Conjugated bile acid biosynthesis, cholate => taurocholate/glycocholate
md:M00107	Steroid hormone biosynthesis, cholesterol => prognenolone => progesterone	K00498 (K00070,K01822)	M00107	M00107 : Steroid hormone biosynthesis, cholesterol => prognenolone => progesterone
md:M00108	C21-Steroid hormone biosynthesis, progesterone => corticosterone/aldosterone	K00513 (K00497,K07433) K07433	M00108	M00108 : C21-Steroid hormone biosynthesis, progesterone => corticosterone/aldosterone
md:M00109	C21-Steroid hormone biosynthesis, progesterone => cortisol/cortisone	K00512 K00513 (K00497,K07433) (K15680,K00071)	M00109	M00109 : C21-Steroid hormone biosynthesis, progesterone => cortisol/cortisone
md:M00110	C19/C18-Steroid hormone biosynthesis, pregnenolone => androstenedione => estrone	K00512 (K00070,K01822) K07434	M00110	M00110 : C19/C18-Steroid hormone biosynthesis, pregnenolone => androstenedione => estrone
md:M00112	Tocopherol/tocotorienol biosynthesis	K09833 (K12502,K18534) K09834 K05928	M00112	M00112 : Tocopherol/tocotorienol biosynthesis
md:M00113	Jasmonic acid biosynthesis	K00454 K01723 K10525 K05894 K10526 K00232 K10527 K07513 --	M00113	M00113 : Jasmonic acid biosynthesis
md:M00114	Ascorbate biosynthesis, plants, glucose-6P => ascorbate	((K01810,K06859,K13810) (K01809,K16011),K15916) (K16881,(K17497,K01840,K15778) (K00966,K00971,K16011)) K10046 K14190 (K10047,K18649) (K00064,K17744) K00225	M00114	M00114 : Ascorbate biosynthesis, plants, glucose-6P => ascorbate
md:M00115	NAD biosynthesis, aspartate => NAD	K00278 K03517 K00767 (K00969,K06210) (K01916,K01950)	M00115	M00115 : NAD biosynthesis, aspartate => NAD
md:M00116	Menaquinone biosynthesis, chorismate => menaquinol	K02552 K02551 K08680 K02549 K01911 K01661 K19222 K02548 K03183	M00116	M00116 : Menaquinone biosynthesis, chorismate => menaquinol
md:M00117	Ubiquinone biosynthesis, prokaryotes, chorismate => ubiquinone	(K03181,K18240) K03179 (K03182+K03186) K18800 K00568 K03185 K03183 K03184 K00568	M00117	M00117 : Ubiquinone biosynthesis, prokaryotes, chorismate => ubiquinone
md:M00118	Glutathione biosynthesis, glutamate => glutathione	(K11204+K11205,K01919) (K21456,K01920)	M00118	M00118 : Glutathione biosynthesis, glutamate => glutathione
md:M00119	Pantothenate biosynthesis, valine/L-aspartate => pantothenate	K00826 K00606 K00077	M00119	M00119 : Pantothenate biosynthesis, valine/L-aspartate => pantothenate
md:M00120	Coenzyme A biosynthesis, pantothenate => CoA	(K00867,K03525,K09680,K01947) ((K01922,K21977) K01598,K13038) (K02318,(K00954,K02201) K00859)	M00120	M00120 : Coenzyme A biosynthesis, pantothenate => CoA
md:M00121	Heme biosynthesis, plants and bacteria, glutamate => heme	(K01885,K14163) K02492 K01845 K01698 K01749 (K01719,K13542,K13543) K01599 (K00228,K02495) (K00230,K00231) K01772	M00121	M00121 : Heme biosynthesis, plants and bacteria, glutamate => heme
md:M00122	Cobalamin biosynthesis, cobinamide => cobalamin	(K00798,K19221) K02232 (K02225,K02227) K02231	M00122	M00122 : Cobalamin biosynthesis, cobinamide => cobalamin
md:M00123	Biotin biosynthesis, pimeloyl-ACP/CoA => biotin	K00652 ((K00833,K19563) K01935,K19562) K01012	M00123	M00123 : Biotin biosynthesis, pimeloyl-ACP/CoA => biotin
md:M00124	Pyridoxal biosynthesis, erythrose-4P => pyridoxal-5P	K03472 K03473 K00831 K00097 K03474 (K00275,K23998)	M00124	M00124 : Pyridoxal biosynthesis, erythrose-4P => pyridoxal-5P
md:M00125	Riboflavin biosynthesis, GTP => riboflavin/FMN/FAD	K01497,K14652 (K01498 K00082,K11752) K22912,K20860,K20861,K20862,K21063,K21064	M00125	M00125 : Riboflavin biosynthesis, GTP => riboflavin/FMN/FAD
md:M00126	Tetrahydrofolate biosynthesis, GTP => THF	(K01495,K09007,K22391) (K01077,K01113,(K08310,K19965)) ((K13939,(K13940,K01633 K00950) K00796),(K01633 K13941)) (K11754,K20457) (K00287,K13998)	M00126	M00126 : Tetrahydrofolate biosynthesis, GTP => THF
md:M00127	Thiamine biosynthesis, AIR => thiamine-P/thiamine-2P	K03147 (K00877,K00941,K14153)	M00127	M00127 : Thiamine biosynthesis, AIR => thiamine-P/thiamine-2P
md:M00128	Ubiquinone biosynthesis, eukaryotes, 4-hydroxybenzoate => ubiquinone	K06125 K00591 K06126 K06127 K06134 K00591	M00128	M00128 : Ubiquinone biosynthesis, eukaryotes, 4-hydroxybenzoate => ubiquinone
md:M00129	Ascorbate biosynthesis, animals, glucose-1P => ascorbate	K00963 K00012 K00699 (K01195,K14756) K00002 K01053 K00103	M00129	M00129 : Ascorbate biosynthesis, animals, glucose-1P => ascorbate
md:M00130	Inositol phosphate metabolism, PI=> PIP2 => Ins(1,4,5)P3 => Ins(1,3,4,5)P4	(K00888,K19801,K13711) (K00889,K13712) (K01116,K05857,K05858,K05859,K05860,K05861) K00911	M00130	M00130 : Inositol phosphate metabolism, PI=> PIP2 => Ins(1,4,5)P3 => Ins(1,3,4,5)P4
md:M00131	Inositol phosphate metabolism, Ins(1,3,4,5)P4 => Ins(1,3,4)P3 => myo-inositol	K01106 (K01107,K15422) K01109 (K01092,K15759,K10047,K18649)	M00131	M00131 : Inositol phosphate metabolism, Ins(1,3,4,5)P4 => Ins(1,3,4)P3 => myo-inositol
md:M00132	Inositol phosphate metabolism, Ins(1,3,4)P3 => phytate	(K00913,K01765) K00915 K10572	M00132	M00132 : Inositol phosphate metabolism, Ins(1,3,4)P3 => phytate
md:M00133	Polyamine biosynthesis, arginine => agmatine => putrescine => spermidine	(K01583,K01584,K01585,K02626) K01480	M00133	M00133 : Polyamine biosynthesis, arginine => agmatine => putrescine => spermidine
md:M00134	Polyamine biosynthesis, arginine => ornithine => putrescine	K01476 K01581	M00134	M00134 : Polyamine biosynthesis, arginine => ornithine => putrescine
md:M00135	GABA biosynthesis, eukaryotes, putrescine => GABA	K00657 K00274 (K00128,K14085,K00149) --	M00135	M00135 : GABA biosynthesis, eukaryotes, putrescine => GABA
md:M00136	GABA biosynthesis, prokaryotes, putrescine => GABA	K09470 K09471 K09472 K09473	M00136	M00136 : GABA biosynthesis, prokaryotes, putrescine => GABA
md:M00137	Flavanone biosynthesis, phenylalanine => naringenin	K10775 K00487 K01904 K00660 K01859	M00137	M00137 : Flavanone biosynthesis, phenylalanine => naringenin
md:M00138	Flavonoid biosynthesis, naringenin => pelargonidin	K00475 K13082 K05277	M00138	M00138 : Flavonoid biosynthesis, naringenin => pelargonidin
md:M00140	C1-unit interconversion, prokaryotes	K00600 (K01491,(K00300 K01500)) K01938	M00140	M00140 : C1-unit interconversion, prokaryotes
md:M00141	C1-unit interconversion, eukaryotes	K00600 (K00288,(K13403 K13402))	M00141	M00141 : C1-unit interconversion, eukaryotes
md:M00142	NADH:ubiquinone oxidoreductase, mitochondria	K03878+K03879+K03880+K03881+K03882+K03883+K03884	M00142	M00142 : NADH:ubiquinone oxidoreductase, mitochondria
md:M00143	NADH dehydrogenase (ubiquinone) Fe-S protein/flavoprotein complex, mitochondria	K03934+K03935+K03936+K03937+K03938+K03939+K03940+K03941+K03942+K03943-K03944	M00143	M00143 : NADH dehydrogenase (ubiquinone) Fe-S protein/flavoprotein complex, mitochondria
md:M00144	NADH:quinone oxidoreductase, prokaryotes	K00330+(K00331+K00332+K00333,K00331+K13378,K13380)+K00334+K00335+K00336+K00337+K00338+K00339+K00340+(K00341+K00342,K15863)+K00343	M00144	M00144 : NADH:quinone oxidoreductase, prokaryotes
md:M00145	NAD(P)H:quinone oxidoreductase, chloroplasts and cyanobacteria	K05574+K05582+K05581+K05579+K05572+K05580+K05578+K05576+K05577+K05575+K05573-K05583-K05584-K05585	M00145	M00145 : NAD(P)H:quinone oxidoreductase, chloroplasts and cyanobacteria
md:M00146	NADH dehydrogenase (ubiquinone) 1 alpha subcomplex	K03945+K03946+K03947+K03948+K03949+K03950+K03951+K03952+K03953+K03954+K03955+K03956+K11352+K11353	M00146	M00146 : NADH dehydrogenase (ubiquinone) 1 alpha subcomplex
md:M00147	NADH dehydrogenase (ubiquinone) 1 beta subcomplex	K03957+K03958+K03959+K03960+K03961+K03962+K03963+K03964+K03965+K03966+K11351+K03967+K03968	M00147	M00147 : NADH dehydrogenase (ubiquinone) 1 beta subcomplex
md:M00148	Succinate dehydrogenase (ubiquinone)	K00236+K00237+K00234+K00235	M00148	M00148 : Succinate dehydrogenase (ubiquinone)
md:M00149	Succinate dehydrogenase, prokaryotes	K00241+(K00242,K18859,K18860)+K00239+K00240	M00149	M00149 : Succinate dehydrogenase, prokaryotes
md:M00150	Fumarate reductase, prokaryotes	K00244+K00245+K00246+K00247	M00150	M00150 : Fumarate reductase, prokaryotes
md:M00151	Cytochrome bc1 complex respiratory unit	((K00412+K00413,K00410)+K00411),K03886+K03887+K03888,K03890+K03891+K03889	M00151	M00151 : Cytochrome bc1 complex respiratory unit
md:M00152	Cytochrome bc1 complex	(K00412+K00413,K00410)+K00411+K00414+K00415+K00416+K00417+K00418+K00419+K00420	M00152	M00152 : Cytochrome bc1 complex
md:M00153	Cytochrome bd ubiquinol oxidase	K00425+K00426+(K00424,K22501)	M00153	M00153 : Cytochrome bd ubiquinol oxidase
md:M00154	Cytochrome c oxidase	(K02257+K02262+K02256+K02261+K02263+K02264+K02265+K02266+K02267+K02268+(K02269,K02270-K02271)+K02272-K02273+K02258+K02259+K02260)	M00154	M00154 : Cytochrome c oxidase
md:M00155	Cytochrome c oxidase, prokaryotes	K02275+(K02274+K02276,K15408)-K02277	M00155	M00155 : Cytochrome c oxidase, prokaryotes
md:M00156	Cytochrome c oxidase, cbb3-type	((K00404+K00405,K15862)+K00407+K00406)	M00156	M00156 : Cytochrome c oxidase, cbb3-type
md:M00157	F-type ATPase, prokaryotes and chloroplasts	K02111+K02112+K02113+K02114+K02115+K02108+K02109+K02110	M00157	M00157 : F-type ATPase, prokaryotes and chloroplasts
md:M00158	F-type ATPase, eukaryotes	K02132+K02133+K02136+K02134+K02135+K02137+K02126+K02127+K02128+K02138+(K02129,K01549)+(K02130,K02139)+K02140+(K02141,K02131)-K02142-K02143+K02125	M00158	M00158 : F-type ATPase, eukaryotes
md:M00159	V/A-type ATPase, prokaryotes	K02117+K02118+K02119+K02120+K02121+K02122+K02107+K02123+K02124	M00159	M00159 : V/A-type ATPase, prokaryotes
md:M00160	V-type ATPase, eukaryotes	K02145+K02147+K02148+K02149+K02150+K02151+K02152+K02144+K02154+(K03661,K02155)+K02146+K02153+K03662	M00160	M00160 : V-type ATPase, eukaryotes
md:M00161	Photosystem II	K02703+K02706+K02705+K02704+K02707+K02708	M00161	M00161 : Photosystem II
md:M00162	Cytochrome b6f complex	K02635+K02637+K02634+K02636+K02642+K02643+K03689+K02640	M00162	M00162 : Cytochrome b6f complex
md:M00163	Photosystem I	K02689+K02690+K02691+K02692+K02693+K02694	M00163	M00163 : Photosystem I
md:M00165	Reductive pentose phosphate cycle (Calvin cycle)	K00855 (K01601-K01602) K00927 (K05298,K00150,K00134) (K01623,K01624) (K03841,K02446,K11532,K01086) K00615 (K01623,K01624) (K01100,K11532,K01086) K00615 (K01807,K01808)	M00165	M00165 : Reductive pentose phosphate cycle (Calvin cycle)
md:M00166	Reductive pentose phosphate cycle, ribulose-5P => glyceraldehyde-3P	K00855 (K01601-K01602) K00927 (K05298,K00150,K00134)	M00166	M00166 : Reductive pentose phosphate cycle, ribulose-5P => glyceraldehyde-3P
md:M00167	Reductive pentose phosphate cycle, glyceraldehyde-3P => ribulose-5P	(K01623,K01624) (K03841,K02446,K11532,K01086) K00615 (K01623,K01624) (K01100,K11532,K01086) K00615 (K01807,K01808)	M00167	M00167 : Reductive pentose phosphate cycle, glyceraldehyde-3P => ribulose-5P
md:M00168	CAM (Crassulacean acid metabolism), dark	K01595 (K00025,K00026,K00024)	M00168	M00168 : CAM (Crassulacean acid metabolism), dark
md:M00169	CAM (Crassulacean acid metabolism), light	K00029 K01006	M00169	M00169 : CAM (Crassulacean acid metabolism), light
md:M00170	C4-dicarboxylic acid cycle, phosphoenolpyruvate carboxykinase type	K01595 K14454 K14455 K01610	M00170	M00170 : C4-dicarboxylic acid cycle, phosphoenolpyruvate carboxykinase type
md:M00171	C4-dicarboxylic acid cycle, NAD - malic enzyme type	K01595 K14454 K14455 (K00025,K00026) K00028 (K00814,K14272) K01006	M00171	M00171 : C4-dicarboxylic acid cycle, NAD - malic enzyme type
md:M00172	C4-dicarboxylic acid cycle, NADP - malic enzyme type	K01595 K00051 K00029 K01006	M00172	M00172 : C4-dicarboxylic acid cycle, NADP - malic enzyme type
md:M00173	Reductive citrate cycle (Arnon-Buchanan cycle)	(K00169+K00170+K00171+K00172,K03737) ((K01007,K01006) K01595,K01959+K01960,K01958) K00024 (K01676,K01679,K01677+K01678) (K00239+K00240-K00241-K00242,K00244+K00245-K00246-K00247,K18556+K18557+K18558+K18559+K18560) (K01902+K01903) (K00174+K00175-K00177-K00176) K00031 (K01681,K01682) (K15230+K15231,K15232+K15233 K15234)	M00173	M00173 : Reductive citrate cycle (Arnon-Buchanan cycle)
md:M00174	Methane oxidation, methanotroph, methane => formaldehyde	((K10944+K10945+K10946),(K16157+K16158+K16159+K16160+K16161+K16162)) ((K14028-K14029),K23995)	M00174	M00174 : Methane oxidation, methanotroph, methane => formaldehyde
md:M00175	Nitrogen fixation, nitrogen => ammonia	K02588+K02586+K02591-K00531,K22896+K22897+K22898+K22899	M00175	M00175 : Nitrogen fixation, nitrogen => ammonia
md:M00176	Assimilatory sulfate reduction, sulfate => H2S	(K13811,K00958+K00860,K00955+K00957,K00956+K00957+K00860) K00390 (K00380+K00381,K00392)	M00176	M00176 : Assimilatory sulfate reduction, sulfate => H2S
md:M00307	Pyruvate oxidation, pyruvate => acetyl-CoA	((K00163,K00161+K00162)+K00627+K00382-K13997),K00169+K00170+K00171+K00172,K03737	M00307	M00307 : Pyruvate oxidation, pyruvate => acetyl-CoA
md:M00308	Semi-phosphorylative Entner-Doudoroff pathway, gluconate => glycerate-3P	K05308 K00874 K01625 (K00134 K00927,K00131,K18978)	M00308	M00308 : Semi-phosphorylative Entner-Doudoroff pathway, gluconate => glycerate-3P
md:M00309	Non-phosphorylative Entner-Doudoroff pathway, gluconate/galactonate => glycerate	K05308 (K11395,K18127) (K18020+K18021+K18022,K18128,K03738)	M00309	M00309 : Non-phosphorylative Entner-Doudoroff pathway, gluconate/galactonate => glycerate
md:M00338	Cysteine biosynthesis, homocysteine + serine => cysteine	(K01697,K10150) K01758	M00338	M00338 : Cysteine biosynthesis, homocysteine + serine => cysteine
md:M00344	Formaldehyde assimilation, xylulose monophosphate pathway	K17100 K00863 K01624 K03841	M00344	M00344 : Formaldehyde assimilation, xylulose monophosphate pathway
md:M00345	Formaldehyde assimilation, ribulose monophosphate pathway	(((K08093,K13812) K08094),K13831) (K00850,K16370) K01624	M00345	M00345 : Formaldehyde assimilation, ribulose monophosphate pathway
md:M00346	Formaldehyde assimilation, serine pathway	K00600 K00830 K00018 K11529 K01689 K01595 K00024 K08692+K14067 K08691	M00346	M00346 : Formaldehyde assimilation, serine pathway
md:M00356	Methanogenesis, methanol => methane	K14080+K04480+K14081 K00399+K00401+K00402 (K22480+K22481+K22482,K03388+K03389+K03390,K08264+K08265,K03388+K03389+K03390+K14127+(K14126+K14128,K22516+K00125))	M00356	M00356 : Methanogenesis, methanol => methane
md:M00357	Methanogenesis, acetate => methane	(K00925 (K00625,K13788),K01895) (K00193+K00197+K00194) (K00577+K00578+K00579+K00580+K00581-K00582-K00583+K00584) (K00399+K00401+K00402) (K22480+K22481+K22482,K03388+K03389+K03390,K08264+K08265,K03388+K03389+K03390+K14127+(K14126+K14128,K22516+K00125))	M00357	M00357 : Methanogenesis, acetate => methane
md:M00358	Coenzyme M biosynthesis	K08097 K05979 K05884 K13039+K06034	M00358	M00358 : Coenzyme M biosynthesis
md:M00363	EHEC pathogenicity signature, Shiga toxin	K11006 K11007	M00363	M00363 : EHEC pathogenicity signature, Shiga toxin
md:M00364	C10-C20 isoprenoid biosynthesis, bacteria	K01823 (K00795,K13789,K13787)	M00364	M00364 : C10-C20 isoprenoid biosynthesis, bacteria
md:M00365	C10-C20 isoprenoid biosynthesis, archaea	K01823 K13787	M00365	M00365 : C10-C20 isoprenoid biosynthesis, archaea
md:M00366	C10-C20 isoprenoid biosynthesis, plants	K01823 K14066 K00787 K13789	M00366	M00366 : C10-C20 isoprenoid biosynthesis, plants
md:M00367	C10-C20 isoprenoid biosynthesis, non-plant eukaryotes	K01823 K00787 K00804	M00367	M00367 : C10-C20 isoprenoid biosynthesis, non-plant eukaryotes
md:M00368	Ethylene biosynthesis, methionine => ethylene	K00789 (K01762,K20772) K05933	M00368	M00368 : Ethylene biosynthesis, methionine => ethylene
md:M00369	Cyanogenic glycoside biosynthesis, tyrosine => dhurrin	K13027 K13029 K13030	M00369	M00369 : Cyanogenic glycoside biosynthesis, tyrosine => dhurrin
md:M00370	Glucosinolate biosynthesis, tryptophan => glucobrassicin	(K11812,K11813) K11818 K11819 K11820 K11821	M00370	M00370 : Glucosinolate biosynthesis, tryptophan => glucobrassicin
md:M00371	Castasterone biosynthesis, campesterol => castasterone	(K09587,K12639) K09588 K09591 (K12637,K12638) K20623 (K09590,K12640)	M00371	M00371 : Castasterone biosynthesis, campesterol => castasterone
md:M00372	Abscisic acid biosynthesis, beta-carotene => abscisic acid	(K15746,K15747) K09838 -K14594 K09840 K09841 K09842	M00372	M00372 : Abscisic acid biosynthesis, beta-carotene => abscisic acid
md:M00373	Ethylmalonyl pathway	K00626 K00023 K17865 K14446 K14447 K14448 K14449 K08691 K14451	M00373	M00373 : Ethylmalonyl pathway
md:M00374	Dicarboxylate-hydroxybutyrate cycle	K00169+K00170+K00171+K00172 K01007 K01595 K00024 (K01676,K01677+K01678) (K00239+K00240-K00241-K18860) K01902+K01903 (K15038,K15017) K14465 (K14467,K18861) K14534 K15016 K00626	M00374	M00374 : Dicarboxylate-hydroxybutyrate cycle
md:M00375	Hydroxypropionate-hydroxybutylate cycle	K01964+K15037+K15036 K15017 K15039 K15018 K15019 K15020 K05606 K01848+K01849 (K15038,K15017) K14465 (K14466,K18861) K14534 K15016 K00626	M00375	M00375 : Hydroxypropionate-hydroxybutylate cycle
md:M00376	3-Hydroxypropionate bi-cycle	K02160+K01961+K01962+K01963 K14468 K14469 K15052 K05606 (K01847,K01848+K01849) K14471+K14472 K00239+K00240+K00241 K01679	M00376	M00376 : 3-Hydroxypropionate bi-cycle
md:M00377	Reductive acetyl-CoA pathway (Wood-Ljungdahl pathway)	K00198 K05299-K15022 K01938 K01491 K00297 K15023 K14138+K00197+K00194	M00377	M00377 : Reductive acetyl-CoA pathway (Wood-Ljungdahl pathway)
md:M00378	F420 biosynthesis	(K11779,K11780+K11781)	M00378	M00378 : F420 biosynthesis
md:M00415	Fatty acid elongation in endoplasmic reticulum	(K10247,K10205,K10248,K10249,K10244,K10203,K10250,K15397,K10245,K10246) K10251 K10703 K10258	M00415	M00415 : Fatty acid elongation in endoplasmic reticulum
md:M00416	Cytochrome aa3-600 menaquinol oxidase	K02827+K02826+K02828+K02829	M00416	M00416 : Cytochrome aa3-600 menaquinol oxidase
md:M00417	Cytochrome o ubiquinol oxidase	K02297+K02298+K02299+K02300	M00417	M00417 : Cytochrome o ubiquinol oxidase
md:M00418	Toluene degradation, anaerobic, toluene => benzoyl-CoA	K07540 K07543+K07544 K07545 K07546 K07547+K07548 K07549+K07550	M00418	M00418 : Toluene degradation, anaerobic, toluene => benzoyl-CoA
md:M00419	Cymene degradation, p-cymene => p-cumate	K10616+K18293 K10617 K10618	M00419	M00419 : Cymene degradation, p-cymene => p-cumate
md:M00422	Acetyl-CoA pathway, CO2 => acetyl-CoA	K00192+K00195 K00193+K00197+K00194	M00422	M00422 : Acetyl-CoA pathway, CO2 => acetyl-CoA
md:M00432	Leucine biosynthesis, 2-oxoisovalerate => 2-oxoisocaproate	K01649 (K01702,K01703+K01704) K00052	M00432	M00432 : Leucine biosynthesis, 2-oxoisovalerate => 2-oxoisocaproate
md:M00433	Lysine biosynthesis, 2-oxoglutarate => 2-oxoadipate	K01655 (K17450 K01705,K16792+K16793) K05824	M00433	M00433 : Lysine biosynthesis, 2-oxoglutarate => 2-oxoadipate
md:M00525	Lysine biosynthesis, acetyl-DAP pathway, aspartate => lysine	K00928 K00133 K01714 K00215 K05822 K00841 K05823 K01778 K01586	M00525	M00525 : Lysine biosynthesis, acetyl-DAP pathway, aspartate => lysine
md:M00526	Lysine biosynthesis, DAP dehydrogenase pathway, aspartate => lysine	(K00928,K12524,K12525,K12526) K00133 K01714 K00215 K03340 (K01586,K12526)	M00526	M00526 : Lysine biosynthesis, DAP dehydrogenase pathway, aspartate => lysine
md:M00527	Lysine biosynthesis, DAP aminotransferase pathway, aspartate => lysine	(K00928,K12524,K12525,K12526) K00133 K01714 K00215 K10206 K01778 (K01586,K12526)	M00527	M00527 : Lysine biosynthesis, DAP aminotransferase pathway, aspartate => lysine
md:M00528	Nitrification, ammonia => nitrite	K10944+K10945+K10946 K10535	M00528	M00528 : Nitrification, ammonia => nitrite
md:M00529	Denitrification, nitrate => nitrogen	(K00370+K00371+K00374,K02567+K02568) (K00368,K15864) (K04561+K02305) K00376	M00529	M00529 : Denitrification, nitrate => nitrogen
md:M00530	Dissimilatory nitrate reduction, nitrate => ammonia	(K00370+K00371+K00374,K02567+K02568) (K00362+K00363,K03385+K15876)	M00530	M00530 : Dissimilatory nitrate reduction, nitrate => ammonia
md:M00531	Assimilatory nitrate reduction, nitrate => ammonia	(K00367,K10534,K00372-K00360) (K00366,K17877)	M00531	M00531 : Assimilatory nitrate reduction, nitrate => ammonia
md:M00532	Photorespiration	(K01601-K01602) K19269 K11517 K03781 K14272 K00600 K00830 (K15893,K15919) K15918	M00532	M00532 : Photorespiration
md:M00533	Homoprotocatechuate degradation, homoprotocatechuate => 2-oxohept-3-enedioate	K00455 K00151 K01826 K05921	M00533	M00533 : Homoprotocatechuate degradation, homoprotocatechuate => 2-oxohept-3-enedioate
md:M00534	Naphthalene degradation, naphthalene => salicylate	K14579+K14580+K14578+K14581 K14582 K14583 K14584 K14585 K00152	M00534	M00534 : Naphthalene degradation, naphthalene => salicylate
md:M00535	Isoleucine biosynthesis, pyruvate => 2-oxobutanoate	K09011 K01703+K01704 K00052	M00535	M00535 : Isoleucine biosynthesis, pyruvate => 2-oxobutanoate
md:M00537	Xylene degradation, xylene => methylbenzoate	K15757+K15758 K00055 K00141	M00537	M00537 : Xylene degradation, xylene => methylbenzoate
md:M00538	Toluene degradation, toluene => benzoate	K15760+K15761-K15762+K15763+K15764-K15765 K00055 K00141	M00538	M00538 : Toluene degradation, toluene => benzoate
md:M00539	Cumate degradation, p-cumate => 2-oxopent-4-enoate + 2-methylpropanoate	K10619+K16303+K16304+K18227 K10620 K10621 K10622 K10623	M00539	M00539 : Cumate degradation, p-cumate => 2-oxopent-4-enoate + 2-methylpropanoate
md:M00540	Benzoate degradation, cyclohexanecarboxylic acid =>pimeloyl-CoA	K04116 K04117 K07534 K07535 K07536	M00540	M00540 : Benzoate degradation, cyclohexanecarboxylic acid =>pimeloyl-CoA
md:M00541	Benzoyl-CoA degradation, benzoyl-CoA => 3-hydroxypimeloyl-CoA	(K04112+K04113+K04114+K04115,K19515+K19516) K07537 K07538 K07539	M00541	M00541 : Benzoyl-CoA degradation, benzoyl-CoA => 3-hydroxypimeloyl-CoA
md:M00542	EHEC/EPEC pathogenicity signature, T3SS and effectors	K03221+K03219+K03222+K03226+K03227+K03228+K03229+K03230+K03224+K03225 K12784 K12787 K12785 K12786 K12788 K16041 K16042	M00542	M00542 : EHEC/EPEC pathogenicity signature, T3SS and effectors
md:M00543	Biphenyl degradation, biphenyl => 2-oxopent-4-enoate + benzoate	K08689+K15750+K18087+K18088 K08690 K00462 K10222	M00543	M00543 : Biphenyl degradation, biphenyl => 2-oxopent-4-enoate + benzoate
md:M00544	Carbazole degradation, carbazole => 2-oxopent-4-enoate + anthranilate	K15751-K15752-K15753 K15754+K15755 K15756	M00544	M00544 : Carbazole degradation, carbazole => 2-oxopent-4-enoate + anthranilate
md:M00545	Trans-cinnamate degradation, trans-cinnamate => acetyl-CoA	(((K05708+K05709+K05710+K00529) K05711),K05712) K05713 K05714 K02554 K01666 K04073	M00545	M00545 : Trans-cinnamate degradation, trans-cinnamate => acetyl-CoA
md:M00546	Purine degradation, xanthine => urea	(K00106,K00087+K13479+K13480,K13481+K13482,K11177+K11178+K13483) (K00365,K16838,K16839,K22879) (K13484,K07127 (K13485,K16838,K16840)) (K01466,K16842) K01477	M00546	M00546 : Purine degradation, xanthine => urea
md:M00547	Benzene/toluene degradation, benzene => catechol / toluene => 3-methylcatechol	K03268+K16268+K18089+K18090 K16269	M00547	M00547 : Benzene/toluene degradation, benzene => catechol / toluene => 3-methylcatechol
md:M00548	Benzene degradation, benzene => catechol	K16249+K16243+K16244+K16242+K16245+K16246	M00548	M00548 : Benzene degradation, benzene => catechol
md:M00549	Nucleotide sugar biosynthesis, glucose => UDP-glucose	(K00844,K00845,K12407,K00886) K01835 K00963	M00549	M00549 : Nucleotide sugar biosynthesis, glucose => UDP-glucose
md:M00550	Ascorbate degradation, ascorbate => D-xylulose-5P	K02821+K02822+K03475 K03476 K03078 K03079 K03077	M00550	M00550 : Ascorbate degradation, ascorbate => D-xylulose-5P
md:M00551	Benzoate degradation, benzoate => catechol / methylbenzoate => methylcatechol	K05549+K05550+K05784 K05783	M00551	M00551 : Benzoate degradation, benzoate => catechol / methylbenzoate => methylcatechol
md:M00552	D-galactonate degradation, De Ley-Doudoroff pathway, D-galactonate => glycerate-3P	K01684 K00883 K01631 K00134 K00927	M00552	M00552 : D-galactonate degradation, De Ley-Doudoroff pathway, D-galactonate => glycerate-3P
md:M00554	Nucleotide sugar biosynthesis, galactose => UDP-galactose	K00849 K00965	M00554	M00554 : Nucleotide sugar biosynthesis, galactose => UDP-galactose
md:M00555	Betaine biosynthesis, choline => betaine	(K17755,((K00108,K11440,K00499) (K00130,K14085)))	M00555	M00555 : Betaine biosynthesis, choline => betaine
md:M00563	Methanogenesis, methylamine/dimethylamine/trimethylamine => methane	K14082 ((K16177-K16176),(K16179-K16178),(K14084-K14083)) K00399+K00401+K00402 (K22480+K22481+K22482,K03388+K03389+K03390,K08264+K08265,K03388+K03389+K03390+K14127+(K14126+K14128,K22516+K00125))	M00563	M00563 : Methanogenesis, methylamine/dimethylamine/trimethylamine => methane
md:M00564	Helicobacter pylori pathogenicity signature, cagA pathogenicity island	K15842 K12086 -K12087 K12088 K12089 K12090 K03196 K12091 -K12092 K12093 K12094 K12095 K12096 K12097 K12098 -K12099 -K12100 K12101 K12102 K12103 K12104 K12105 K12106 K12107 K12108 K12109 K12110	M00564	M00564 : Helicobacter pylori pathogenicity signature, cagA pathogenicity island
md:M00565	Trehalose biosynthesis, D-glucose 1P => trehalose	K00975 K00703 (K00700,K16149) K01214 K06044 K01236	M00565	M00565 : Trehalose biosynthesis, D-glucose 1P => trehalose
md:M00567	Methanogenesis, CO2 => methane	(K00200+K00201+K00202+K00203-K11261+(K00205,K11260,K00204)) K00672 K01499 (K00319,K13942) K00320 (K00577+K00578+K00579+K00580+K00581-K00582-K00583+K00584) (K00399+K00401+K00402) (K22480+K22481+K22482,K03388+K03389+K03390,K08264+K08265,K03388+K03389+K03390+K14127+(K14126+K14128,K22516+K00125))	M00567	M00567 : Methanogenesis, CO2 => methane
md:M00568	Catechol ortho-cleavage, catechol => 3-oxoadipate	K03381 K01856 K03464 (K01055,K14727)	M00568	M00568 : Catechol ortho-cleavage, catechol => 3-oxoadipate
md:M00569	Catechol meta-cleavage, catechol => acetyl-CoA / 4-methylcatechol => propanoyl-CoA	(K00446,K07104) ((K10217 K01821 K01617),K10216) (K18364,K02554) (K18365,K01666) (K18366,K04073)	M00569	M00569 : Catechol meta-cleavage, catechol => acetyl-CoA / 4-methylcatechol => propanoyl-CoA
md:M00570	Isoleucine biosynthesis, threonine => 2-oxobutanoate => isoleucine	(K17989,K01754) K01652+(K01653,K11258) K00053 K01687 K00826	M00570	M00570 : Isoleucine biosynthesis, threonine => 2-oxobutanoate => isoleucine
md:M00572	Pimeloyl-ACP biosynthesis, BioC-BioH pathway, malonyl-ACP => pimeloyl-ACP	K02169 (K00647,K09458) K00059 K02372 K00208 (K02170,K09789,K19560,K19561)	M00572	M00572 : Pimeloyl-ACP biosynthesis, BioC-BioH pathway, malonyl-ACP => pimeloyl-ACP
md:M00573	Biotin biosynthesis, BioI pathway, long-chain-acyl-ACP => pimeloyl-ACP => biotin	K16593 K00652 K19563 K01935 K01012	M00573	M00573 : Biotin biosynthesis, BioI pathway, long-chain-acyl-ACP => pimeloyl-ACP => biotin
md:M00574	Pertussis pathogenicity signature, pertussis toxin	K11023 -K11024 K11025 K11026 K11027	M00574	M00574 : Pertussis pathogenicity signature, pertussis toxin
md:M00575	Pertussis pathogenicity signature, T1SS	K22944 K11004 K07389 K11003 K12340	M00575	M00575 : Pertussis pathogenicity signature, T1SS
md:M00576	ETEC pathogenicity signature, heat-labile and heat-stable enterotoxins	(K10928+K10929) (K16883,K16884)	M00576	M00576 : ETEC pathogenicity signature, heat-labile and heat-stable enterotoxins
md:M00577	Biotin biosynthesis, BioW pathway, pimelate => pimeloyl-CoA => biotin	K01906 K00652 (K00833,K19563) K01935 K01012	M00577	M00577 : Biotin biosynthesis, BioW pathway, pimelate => pimeloyl-CoA => biotin
md:M00579	Phosphate acetyltransferase-acetate kinase pathway, acetyl-CoA => acetate	(K00625,K13788,K15024) K00925	M00579	M00579 : Phosphate acetyltransferase-acetate kinase pathway, acetyl-CoA => acetate
md:M00580	Pentose phosphate pathway, archaea, fructose 6P => ribose 5P	(K08094 (K08093,K13812),K13831) K01807	M00580	M00580 : Pentose phosphate pathway, archaea, fructose 6P => ribose 5P
md:M00595	Thiosulfate oxidation by SOX complex, thiosulfate => sulfate	K17222+K17223+K17224-K17225-K22622+K17226+K17227	M00595	M00595 : Thiosulfate oxidation by SOX complex, thiosulfate => sulfate
md:M00596	Dissimilatory sulfate reduction, sulfate => H2S	K00958 (K00394+K00395) (K11180+K11181)	M00596	M00596 : Dissimilatory sulfate reduction, sulfate => H2S
md:M00597	Anoxygenic photosystem II	K08928+K08929	M00597	M00597 : Anoxygenic photosystem II
md:M00598	Anoxygenic photosystem I	K08940+K08941+K08942+K08943	M00598	M00598 : Anoxygenic photosystem I
md:M00608	2-Oxocarboxylic acid chain extension, 2-oxoglutarate => 2-oxoadipate => 2-oxopimelate => 2-oxosuberate	K10977 K16792+K16793 K10978	M00608	M00608 : 2-Oxocarboxylic acid chain extension, 2-oxoglutarate => 2-oxoadipate => 2-oxopimelate => 2-oxosuberate
md:M00609	Cysteine biosynthesis, methionine => cysteine	K00789 K17462 K01243 K07173 K17216 K17217	M00609	M00609 : Cysteine biosynthesis, methionine => cysteine
md:M00611	Oxygenic photosynthesis in plants and cyanobacteria	(M00161,M00163) M00165	M00611	M00611 : Oxygenic photosynthesis in plants and cyanobacteria
md:M00612	Anoxygenic photosynthesis in purple bacteria	M00597 M00165	M00612	M00612 : Anoxygenic photosynthesis in purple bacteria
md:M00613	Anoxygenic photosynthesis in green nonsulfur bacteria	M00597 M00376	M00613	M00613 : Anoxygenic photosynthesis in green nonsulfur bacteria
md:M00614	Anoxygenic photosynthesis in green sulfur bacteria	M00598 M00173	M00614	M00614 : Anoxygenic photosynthesis in green sulfur bacteria
md:M00615	Nitrate assimilation	(K02575,K15576+K15577+K15578-K15579) M00531	M00615	M00615 : Nitrate assimilation
md:M00616	Sulfate-sulfur assimilation	(K02048,K23163)+K02046+K02047+K02045 M00176	M00616	M00616 : Sulfate-sulfur assimilation
md:M00617	Methanogen	M00567,M00357,M00356,M00563	M00617	M00617 : Methanogen
md:M00618	Acetogen	M00377 M00579	M00618	M00618 : Acetogen
md:M00620	Incomplete reductive citrate cycle, acetyl-CoA => oxoglutarate	K00169+K00170+K00171+K00172 K01959+K01960 K00024 K01677+K01678 K18209+K18210 K01902+K01903 K00174+K00175+K00176+K00177	M00620	M00620 : Incomplete reductive citrate cycle, acetyl-CoA => oxoglutarate
md:M00622	Nicotinate degradation, nicotinate => fumarate	K18029+K18030 K14974 K18028 K15357 K13995 K01799	M00622	M00622 : Nicotinate degradation, nicotinate => fumarate
md:M00623	Phthalate degradation, phthalate => protocatechuate	K18068+K18069 K18067 K04102	M00623	M00623 : Phthalate degradation, phthalate => protocatechuate
md:M00624	Terephthalate degradation, terephthalate => 3,4-dihydroxybenzoate	K18074+K18075+K18077 K18076	M00624	M00624 : Terephthalate degradation, terephthalate => 3,4-dihydroxybenzoate
md:M00625	Methicillin resistance	K02547 K02546 K02545	M00625	M00625 : Methicillin resistance
md:M00627	beta-Lactam resistance, Bla system	K02172 K02171 (K18766,K17836)	M00627	M00627 : beta-Lactam resistance, Bla system
md:M00630	D-Galacturonate degradation (fungi), D-galacturonate => glycerol	(K18106,K19634) K18102 K18103 K18107	M00630	M00630 : D-Galacturonate degradation (fungi), D-galacturonate => glycerol
md:M00631	D-Galacturonate degradation (bacteria), D-galacturonate => pyruvate + D-glyceraldehyde 3P	K01812 K00041 (K01685,K16849+K16850) K00874 (K01625,K17463)	M00631	M00631 : D-Galacturonate degradation (bacteria), D-galacturonate => pyruvate + D-glyceraldehyde 3P
md:M00632	Galactose degradation, Leloir pathway, galactose => alpha-D-glucose-1P	K01785 K00849 K00965 K01784	M00632	M00632 : Galactose degradation, Leloir pathway, galactose => alpha-D-glucose-1P
md:M00633	Semi-phosphorylative Entner-Doudoroff pathway, gluconate/galactonate => glycerate-3P	K05308 K18126 K11395 (K00131,K18978)	M00633	M00633 : Semi-phosphorylative Entner-Doudoroff pathway, gluconate/galactonate => glycerate-3P
md:M00636	Phthalate degradation, phthalate => protocatechuate	K18251+K18252-K18253-K18254 K18255 K18256	M00636	M00636 : Phthalate degradation, phthalate => protocatechuate
md:M00637	Anthranilate degradation, anthranilate => catechol	(K05599+K05600+K11311,K16319+K16320+K18248+K18249)	M00637	M00637 : Anthranilate degradation, anthranilate => catechol
md:M00638	Salicylate degradation, salicylate => gentisate	K18242+K18243+K14578+K14581	M00638	M00638 : Salicylate degradation, salicylate => gentisate
md:M00639	Multidrug resistance, efflux pump MexCD-OprJ	K18294 K18295+K18296-K08721	M00639	M00639 : Multidrug resistance, efflux pump MexCD-OprJ
md:M00641	Multidrug resistance, efflux pump MexEF-OprN	K18297 K18298+K18299-K18300	M00641	M00641 : Multidrug resistance, efflux pump MexEF-OprN
md:M00642	Multidrug resistance, efflux pump MexJK-OprM	K18301 K18302+K18303-K18139	M00642	M00642 : Multidrug resistance, efflux pump MexJK-OprM
md:M00643	Multidrug resistance, efflux pump MexXY-OprM	K18129 K18094+K18095+K18139	M00643	M00643 : Multidrug resistance, efflux pump MexXY-OprM
md:M00649	Multidrug resistance, efflux pump AdeABC	K18143 K18144 K18145+K18146-K18147	M00649	M00649 : Multidrug resistance, efflux pump AdeABC
md:M00651	Vancomycin resistance, D-Ala-D-Lac type	(K18345 K18344 K07260 K18346),(K18351 K18352 K18354 K18353) (K18347 K15739 K08641)	M00651	M00651 : Vancomycin resistance, D-Ala-D-Lac type
md:M00652	Vancomycin resistance, D-Ala-D-Ser type	K18350 K18349 K18348 K18856 K18866	M00652	M00652 : Vancomycin resistance, D-Ala-D-Ser type
md:M00660	Xanthomonas spp. pathogenicity signature, T3SS and effectors	K03222+K03226+K03227+K03228+K03229+K03230+K03224+K03225+K03223+K18374+K18376 K18373 K18375 K18377 K18378 K18379 K18380 K18381	M00660	M00660 : Xanthomonas spp. pathogenicity signature, T3SS and effectors
md:M00661	Paspaline biosynthesis, geranylgeranyl-PP + indoleglycerol phosphate => paspaline	K18385 K18386 K18387	M00661	M00661 : Paspaline biosynthesis, geranylgeranyl-PP + indoleglycerol phosphate => paspaline
md:M00664	Nodulation	K14658 K14659 K14666 K14657	M00664	M00664 : Nodulation
md:M00672	Penicillin biosynthesis, aminoadipate + cycteine + valine => penicillin	K12743 K04126 K10852	M00672	M00672 : Penicillin biosynthesis, aminoadipate + cycteine + valine => penicillin
md:M00673	Cephamycin C biosynthesis, aminoadipate + cycteine + valine => cephamycin C	K12743 K04126 K04127 K12744 K12745 K04128 K18062 K18063	M00673	M00673 : Cephamycin C biosynthesis, aminoadipate + cycteine + valine => cephamycin C
md:M00674	Clavaminate biosynthesis, arginine + glyceraldehyde-3P => clavaminate	K12673 K12674 K12675 K12676	M00674	M00674 : Clavaminate biosynthesis, arginine + glyceraldehyde-3P => clavaminate
md:M00675	Carbapenem-3-carboxylate biosynthesis, pyrroline-5-carboxylate + malonyl-CoA => carbapenem-3-carboxylate	K18317 K18316 K18315	M00675	M00675 : Carbapenem-3-carboxylate biosynthesis, pyrroline-5-carboxylate + malonyl-CoA => carbapenem-3-carboxylate
md:M00696	Multidrug resistance, efflux pump AcrEF-TolC	K18140 K18141+K18142+K12340	M00696	M00696 : Multidrug resistance, efflux pump AcrEF-TolC
md:M00697	Multidrug resistance, efflux pump MdtEF-TolC	K07690 K18898+K18899+K12340	M00697	M00697 : Multidrug resistance, efflux pump MdtEF-TolC
md:M00698	Multidrug resistance, efflux pump BpeEF-OprC	K18900 K18901+K18902+K18903	M00698	M00698 : Multidrug resistance, efflux pump BpeEF-OprC
md:M00700	Multidrug resistance, efflux pump AbcA	(K18906,K18907) K18104	M00700	M00700 : Multidrug resistance, efflux pump AbcA
md:M00702	Multidrug resistance, efflux pump NorB	(K18906,K18907) K08170	M00702	M00702 : Multidrug resistance, efflux pump NorB
md:M00704	Tetracycline resistance, efflux pump Tet38	K18906 K08168	M00704	M00704 : Tetracycline resistance, efflux pump Tet38
md:M00705	Multidrug resistance, efflux pump MepA	K18909 K18908	M00705	M00705 : Multidrug resistance, efflux pump MepA
md:M00714	Multidrug resistance, efflux pump QacA	K18938 K08167	M00714	M00714 : Multidrug resistance, efflux pump QacA
md:M00718	Multidrug resistance, efflux pump MexAB-OprM	K18131 K03585+K18138+K18139	M00718	M00718 : Multidrug resistance, efflux pump MexAB-OprM
md:M00725	Cationic antimicrobial peptide (CAMP) resistance, dltABCD operon	K19077 K19078 K03367+K03739+K14188+K03740	M00725	M00725 : Cationic antimicrobial peptide (CAMP) resistance, dltABCD operon
md:M00726	Cationic antimicrobial peptide (CAMP) resistance, lysyl-phosphatidylglycerol (L-PG) synthase MprF	K19077 K19078 K14205	M00726	M00726 : Cationic antimicrobial peptide (CAMP) resistance, lysyl-phosphatidylglycerol (L-PG) synthase MprF
md:M00730	Cationic antimicrobial peptide (CAMP) resistance, VraFG transporter	K19077 K19078 K19079+K19080	M00730	M00730 : Cationic antimicrobial peptide (CAMP) resistance, VraFG transporter
md:M00736	Nocardicin A biosynthesis, L-pHPG + arginine + serine => nocardicin A	K19102+K19103+K05375 K19104 K19105 K19106	M00736	M00736 : Nocardicin A biosynthesis, L-pHPG + arginine + serine => nocardicin A
md:M00740	Methylaspartate cycle	K01647 K01681 K00031 K00261 K19268+K01846 K04835 K19280 K14449 K19281 K19282 K00024	M00740	M00740 : Methylaspartate cycle
md:M00741	Propanoyl-CoA metabolism, propanoyl-CoA => succinyl-CoA	(K01965+K01966,K11263+(K18472,K19312+K22568),K01964+K15036+K15037) K05606 (K01847,K01848+K01849)	M00741	M00741 : Propanoyl-CoA metabolism, propanoyl-CoA => succinyl-CoA
md:M00744	Cationic antimicrobial peptide (CAMP) resistance, protease PgtE	K07637 K07660 K08477	M00744	M00744 : Cationic antimicrobial peptide (CAMP) resistance, protease PgtE
md:M00745	Imipenem resistance, repression of porin OprD	(K18072 K18073),(K07644 K07665),K18297 K18093	M00745	M00745 : Imipenem resistance, repression of porin OprD
md:M00746	Multidrug resistance, repression of porin OmpF	K13632 K18513 K09476	M00746	M00746 : Multidrug resistance, repression of porin OmpF
md:M00761	Undecaprenylphosphate alpha-L-Ara4N biosynthesis, UDP-GlcA => undecaprenyl phosphate alpha-L-Ara4N	K10011 K07806 K10012 K13014	M00761	M00761 : Undecaprenylphosphate alpha-L-Ara4N biosynthesis, UDP-GlcA => undecaprenyl phosphate alpha-L-Ara4N
md:M00763	Ornithine biosynthesis, mediated by LysW, glutamate => ornithine	K05826	M00763	M00763 : Ornithine biosynthesis, mediated by LysW, glutamate => ornithine
md:M00769	Multidrug resistance, efflux pump MexPQ-OpmE	K18304 K19591 K19595+K19594+K19593	M00769	M00769 : Multidrug resistance, efflux pump MexPQ-OpmE
md:M00773	Tylosin biosynthesis, methylmalonyl-CoA + malonyl-CoA => tylactone => tylosin	K15988 K15989+K15990 K15992 K15991 K15993 K15994 K15995 K15996	M00773	M00773 : Tylosin biosynthesis, methylmalonyl-CoA + malonyl-CoA => tylactone => tylosin
md:M00774	Erythromycin biosynthesis, propanoyl-CoA + methylmalonyl-CoA => deoxyerythronolide B => erythromycin A/B	K10817 K14366 K14367 K14368+K15997 K14370 K14369	M00774	M00774 : Erythromycin biosynthesis, propanoyl-CoA + methylmalonyl-CoA => deoxyerythronolide B => erythromycin A/B
md:M00775	Oleandomycin biosynthesis, malonyl-CoA + methylmalonyl-CoA => 8,8a-deoxyoleandolide => oleandomycin	K16007 K16008 K16009 K13320 K16010	M00775	M00775 : Oleandomycin biosynthesis, malonyl-CoA + methylmalonyl-CoA => 8,8a-deoxyoleandolide => oleandomycin
md:M00776	Pikromycin/methymycin biosynthesis, methylmalonyl-CoA + malonyl-CoA => narbonolide/10-deoxymethynolide => pikromycin/methymycin	K16000+K16001+K16002-K16003 K16004 K16005 K16006	M00776	M00776 : Pikromycin/methymycin biosynthesis, methylmalonyl-CoA + malonyl-CoA => narbonolide/10-deoxymethynolide => pikromycin/methymycin
md:M00777	Avermectin biosynthesis, 2-methylbutanoyl-CoA/isobutyryl-CoA => 6,8a-Seco-6,8a-deoxy-5-oxoavermectin 1a/1b aglycone => avermectin A1a/B1a/A1b/B1b	K14371 K14372 K14373 K14374 K14375	M00777	M00777 : Avermectin biosynthesis, 2-methylbutanoyl-CoA/isobutyryl-CoA => 6,8a-Seco-6,8a-deoxy-5-oxoavermectin 1a/1b aglycone => avermectin A1a/B1a/A1b/B1b
md:M00778	Type II polyketide backbone biosynthesis, acyl-CoA + malonyl-CoA => polyketide	K05551+K05552+K05553 -K12420 ((K05554,K14249,K15884,K15885) (K05555,K14250),K15886)	M00778	M00778 : Type II polyketide backbone biosynthesis, acyl-CoA + malonyl-CoA => polyketide
md:M00779	Dihydrokalafungin biosynthesis, octaketide => dihydrokalafungin	K05556 (K14626,K14627) (K14628,K14629) (K14630+K14631,K14632)	M00779	M00779 : Dihydrokalafungin biosynthesis, octaketide => dihydrokalafungin
md:M00780	Tetracycline/oxytetracycline biosynthesis, pretetramide => tetracycline/oxytetracycline	K14251 K14252 K14253 K14254 K14255 K14256 K21301	M00780	M00780 : Tetracycline/oxytetracycline biosynthesis, pretetramide => tetracycline/oxytetracycline
md:M00781	Nogalavinone/aklavinone biosynthesis, deoxynogalonate/deoxyaklanonate => nogalavinone/aklavinone	K15941 K15942 K15943 K15944	M00781	M00781 : Nogalavinone/aklavinone biosynthesis, deoxynogalonate/deoxyaklanonate => nogalavinone/aklavinone
md:M00782	Mithramycin biosynthesis, 4-demethylpremithramycinone => mithramycin	K15959 K15960 K15961 K15963 K15964 K15965 K15966 K15967	M00782	M00782 : Mithramycin biosynthesis, 4-demethylpremithramycinone => mithramycin
md:M00783	Tetracenomycin C/8-demethyltetracenomycin C biosynthesis, tetracenomycin F2 => tetracenomycin C/8-demethyltetracenomycin C	K15968 K15969 K15886 -K15970 K15971 K15972	M00783	M00783 : Tetracenomycin C/8-demethyltetracenomycin C biosynthesis, tetracenomycin F2 => tetracenomycin C/8-demethyltetracenomycin C
md:M00784	Elloramycin biosynthesis, 8-demethyltetracenomycin C => elloramycin A	K19566 K19567 K19568 K19569 K19570	M00784	M00784 : Elloramycin biosynthesis, 8-demethyltetracenomycin C => elloramycin A
md:M00785	Cycloserine biosynthesis, arginine/serine => cycloserine	K19741 K19723	M00785	M00785 : Cycloserine biosynthesis, arginine/serine => cycloserine
md:M00786	Fumitremorgin alkaloid biosynthesis, tryptophan + proline => fumitremorgin C/A	K18281 K14132 K17475 K18280 K17827 K17826 K14134 K17825 K18279	M00786	M00786 : Fumitremorgin alkaloid biosynthesis, tryptophan + proline => fumitremorgin C/A
md:M00787	Bacilysin biosynthesis, prephenate => bacilysin	K19546 K19547 K19550 K19549 K19548 K13037	M00787	M00787 : Bacilysin biosynthesis, prephenate => bacilysin
md:M00788	Terpentecin biosynthesis, GGAP => terpentecin	K19835 K19834	M00788	M00788 : Terpentecin biosynthesis, GGAP => terpentecin
md:M00789	Rebeccamycin biosynthesis, tryptophan => rebeccamycin	K14266 K19884 K19885 K19886+K19887 K19888 K19889	M00789	M00789 : Rebeccamycin biosynthesis, tryptophan => rebeccamycin
md:M00790	Pyrrolnitrin biosynthesis, tryptophan => pyrrolnitrin	K14266 K19981 K14257 K19982	M00790	M00790 : Pyrrolnitrin biosynthesis, tryptophan => pyrrolnitrin
md:M00793	dTDP-L-rhamnose biosynthesis	K00973 K01710 (K01790 K00067,K23987)	M00793	M00793 : dTDP-L-rhamnose biosynthesis
md:M00794	dTDP-6-deoxy-D-allose biosynthesis	K13312 K13313	M00794	M00794 : dTDP-6-deoxy-D-allose biosynthesis
md:M00795	dTDP-beta-L-noviose biosynthesis	K19855 K12710 K17625	M00795	M00795 : dTDP-beta-L-noviose biosynthesis
md:M00796	dTDP-D-mycaminose biosynthesis	K19853 K19854 K13307	M00796	M00796 : dTDP-D-mycaminose biosynthesis
md:M00797	dTDP-D-desosamine biosynthesis	K13308 K13309 (K13310,K16436) (K13311,K13326)	M00797	M00797 : dTDP-D-desosamine biosynthesis
md:M00798	dTDP-L-mycarose biosynthesis	K16435 K13315 K13317 (K13316,K16438) K13318	M00798	M00798 : dTDP-L-mycarose biosynthesis
md:M00799	dTDP-L-oleandrose biosynthesis	K16435 K13315 K16438 K19856 K19857	M00799	M00799 : dTDP-L-oleandrose biosynthesis
md:M00800	dTDP-L-megosamine biosynthesis	K16435 K16436 K13326 K16438 K13322	M00800	M00800 : dTDP-L-megosamine biosynthesis
md:M00801	dTDP-L-olivose biosynthesis	K16435 K13327 K19858 K13319	M00801	M00801 : dTDP-L-olivose biosynthesis
md:M00802	dTDP-D-forosamine biosynthesis	K16435 K13327 K13328 K13329 K13330	M00802	M00802 : dTDP-D-forosamine biosynthesis
md:M00803	dTDP-D-angolosamine biosynthesis	K16435 K19859 K16436 K13332	M00803	M00803 : dTDP-D-angolosamine biosynthesis
md:M00804	Complete nitrification, comammox, ammonia => nitrite => nitrate	K10944+K10945+K10946 K10535 K00370+K00371	M00804	M00804 : Complete nitrification, comammox, ammonia => nitrite => nitrate
md:M00805	Staurosporine biosynthesis, tryptophan => staurosporine	K20075 K20076 K20077+K20078 K20079 K20080 K20081 K20082	M00805	M00805 : Staurosporine biosynthesis, tryptophan => staurosporine
md:M00808	Violacein biosynthesis, tryptophan => violacein	K20086 K20087+K20088 K20089 K20090	M00808	M00808 : Violacein biosynthesis, tryptophan => violacein
md:M00810	Nicotine degradation, pyridine pathway, nicotine => 2,6-dihydroxypyridine/succinate semialdehyde	K19818+K19819+K19820 (K19826,K19890) K19185+K19186+K19187 K19188 -K20155	M00810	M00810 : Nicotine degradation, pyridine pathway, nicotine => 2,6-dihydroxypyridine/succinate semialdehyde
md:M00811	Nicotine degradation, pyrrolidine pathway, nicotine => succinate semialdehyde	K20170,K20169 (K20170,(K20158 K19700)) K20171-K20172 K15359,K18276	M00811	M00811 : Nicotine degradation, pyrrolidine pathway, nicotine => succinate semialdehyde
md:M00814	Acarbose biosynthesis, sedoheptulopyranose-7P => acarbose	K19969 K19979 K19974 K20424 K20425 K20426 K20427 K20430 -- --	M00814	M00814 : Acarbose biosynthesis, sedoheptulopyranose-7P => acarbose
md:M00815	Validamycin A biosynthesis, sedoheptulopyranose-7P => validamycin A	K19969 K20431 K20432 K20433 K20434 K20435 K20436 K20437 K20438	M00815	M00815 : Validamycin A biosynthesis, sedoheptulopyranose-7P => validamycin A
md:M00819	Pentalenolactone biosynthesis, farnesyl-PP => pentalenolactone	K12250 K15907 -- K18056 K17747 K18091 K18057 K17476	M00819	M00819 : Pentalenolactone biosynthesis, farnesyl-PP => pentalenolactone
md:M00823	Chlortetracycline biosynthesis, pretetramide => chlortetracycline	K14251 K14252 K14253 K14254 K14255 K14256 K21301 K14257+K21297	M00823	M00823 : Chlortetracycline biosynthesis, pretetramide => chlortetracycline
md:M00824	9-membered enediyne core biosynthesis, malonyl-CoA => 3-hydroxyhexadeca-4,6,8,10,12,14-hexaenoyl-ACP => 9-membered enediyne core	K15314 K21160+K21161+K21162+K21163+K21164+K21165+K21166+K21167	M00824	M00824 : 9-membered enediyne core biosynthesis, malonyl-CoA => 3-hydroxyhexadeca-4,6,8,10,12,14-hexaenoyl-ACP => 9-membered enediyne core
md:M00825	10-membered enediyne core biosynthesis, malonyl-CoA => 3-hydroxyhexadeca-4,6,8,10,12,14-hexaenoyl-ACP => 10-membered enediyne core	K15314 K21168+K21169+K21170+K21171+K21172+K21173+K21174	M00825	M00825 : 10-membered enediyne core biosynthesis, malonyl-CoA => 3-hydroxyhexadeca-4,6,8,10,12,14-hexaenoyl-ACP => 10-membered enediyne core
md:M00826	C-1027 benzoxazolinate moiety biosynthesis, chorismate => benzoxazolinyl-CoA	K20159+K21175 K20156 K21176 K21177 K21178 K21179	M00826	M00826 : C-1027 benzoxazolinate moiety biosynthesis, chorismate => benzoxazolinyl-CoA
md:M00827	C-1027 beta-amino acid moiety biosynthesis, tyrosine => 3-chloro-4,5-dihydroxy-beta-phenylalanyl-PCP	K21183	M00827	M00827 : C-1027 beta-amino acid moiety biosynthesis, tyrosine => 3-chloro-4,5-dihydroxy-beta-phenylalanyl-PCP
md:M00828	Maduropeptin beta-hydroxy acid moiety biosynthesis, tyrosine => 3-(4-hydroxyphenyl)-3-oxopropanoyl-PCP	K21183	M00828	M00828 : Maduropeptin beta-hydroxy acid moiety biosynthesis, tyrosine => 3-(4-hydroxyphenyl)-3-oxopropanoyl-PCP
md:M00829	3,6-Dimethylsalicylyl-CoA biosynthesis, malonyl-CoA => 6-methylsalicylate => 3,6-dimethylsalicylyl-CoA	K15320 K21191 K21192	M00829	M00829 : 3,6-Dimethylsalicylyl-CoA biosynthesis, malonyl-CoA => 6-methylsalicylate => 3,6-dimethylsalicylyl-CoA
md:M00830	Neocarzinostatin naphthoate moiety biosynthesis, malonyl-CoA => 2-hydroxy-5-methyl-1-naphthoate => 2-hydroxy-7-methoxy-5-methyl-1-naphthoyl-CoA	K20422 K20420 K20421 K20423	M00830	M00830 : Neocarzinostatin naphthoate moiety biosynthesis, malonyl-CoA => 2-hydroxy-5-methyl-1-naphthoate => 2-hydroxy-7-methoxy-5-methyl-1-naphthoyl-CoA
md:M00831	Kedarcidin 2-hydroxynaphthoate moiety biosynthesis, malonyl-CoA => 3,6,8-trihydroxy-2-naphthoate => 3-hydroxy-7,8-dimethoxy-6-isopropoxy-2-naphthoyl-CoA	K21221 K21222 K21223 K21224 K21225	M00831	M00831 : Kedarcidin 2-hydroxynaphthoate moiety biosynthesis, malonyl-CoA => 3,6,8-trihydroxy-2-naphthoate => 3-hydroxy-7,8-dimethoxy-6-isopropoxy-2-naphthoyl-CoA
md:M00832	Kedarcidin 2-aza-3-chloro-beta-tyrosine moiety biosynthesis, azatyrosine => 2-aza-3-chloro-beta-tyrosyl-PCP	K21183	M00832	M00832 : Kedarcidin 2-aza-3-chloro-beta-tyrosine moiety biosynthesis, azatyrosine => 2-aza-3-chloro-beta-tyrosyl-PCP
md:M00833	Calicheamicin biosynthesis, calicheamicinone => calicheamicin	K21254 K21255 K21256 K21257 K21258	M00833	M00833 : Calicheamicin biosynthesis, calicheamicinone => calicheamicin
md:M00834	Calicheamicin orsellinate moiety biosynthesis, malonyl-CoA => orsellinate-ACP => 5-iodo-2,3-dimethoxyorsellinate-ACP	K21254 K21255 K21256 K21257 K21258	M00834	M00834 : Calicheamicin orsellinate moiety biosynthesis, malonyl-CoA => orsellinate-ACP => 5-iodo-2,3-dimethoxyorsellinate-ACP
md:M00835	Pyocyanine biosynthesis, chorismate => pyocyanine	K13063 K20261 K06998 K20260 K20262 K21103 K20940	M00835	M00835 : Pyocyanine biosynthesis, chorismate => pyocyanine
md:M00836	Coenzyme F430 biosynthesis, sirohydrochlorin => coenzyme F430	K22011 K22012 (K21610+K21611) K21612	M00836	M00836 : Coenzyme F430 biosynthesis, sirohydrochlorin => coenzyme F430
md:M00837	Prodigiosin biosynthesis, L-proline => prodigiosin	K21780+K21781 K21782 K21783 K21784 K21785 K21786	M00837	M00837 : Prodigiosin biosynthesis, L-proline => prodigiosin
md:M00838	Undecylprodigiosin biosynthesis, L-proline => undecylprodigiosin	K21780+K21781 K21782 K21783 K21784 K21785 K21786	M00838	M00838 : Undecylprodigiosin biosynthesis, L-proline => undecylprodigiosin
md:M00840	Tetrahydrofolate biosynthesis, mediated by ribA and trpF, GTP => THF	K14652 K22100 -- K01633 K13941 K22099 K00287	M00840	M00840 : Tetrahydrofolate biosynthesis, mediated by ribA and trpF, GTP => THF
md:M00841	Tetrahydrofolate biosynthesis, mediated by PTPS, GTP => THF	K01495 K22101 K00950 K00796 K11754 K13998	M00841	M00841 : Tetrahydrofolate biosynthesis, mediated by PTPS, GTP => THF
md:M00842	Tetrahydrobiopterin biosynthesis, GTP => BH4	K01495 K01737 K00072	M00842	M00842 : Tetrahydrobiopterin biosynthesis, GTP => BH4
md:M00843	L-threo-Tetrahydrobiopterin biosynthesis, GTP => L-threo-BH4	K01495 K01737 K17745	M00843	M00843 : L-threo-Tetrahydrobiopterin biosynthesis, GTP => L-threo-BH4
md:M00844	Arginine biosynthesis, ornithine => arginine	K00611 K01940 (K01755,K14681)	M00844	M00844 : Arginine biosynthesis, ornithine => arginine
md:M00845	Arginine biosynthesis, glutamate => acetylcitrulline => arginine	K22478 K00145 K00821 K09065 K01438 K01940 K01755	M00845	M00845 : Arginine biosynthesis, glutamate => acetylcitrulline => arginine
md:M00846	Siroheme biosynthesis, glutamate => siroheme	(K01885,K14163) K02492 K01845 K01698 K01749 (K01719,K13542,K13543) (K02302,(K00589,K02303,K02496,K13542,K13543)+K02304-K03794)	M00846	M00846 : Siroheme biosynthesis, glutamate => siroheme
md:M00847	Heme biosynthesis, archaea, siroheme => heme	K22225 K22226 K22227	M00847	M00847 : Heme biosynthesis, archaea, siroheme => heme
md:M00848	Aurachin biosynthesis, anthranilate => aurachin A	K09460 K02078+K14245+K14246+K22798 K22799 K22800 K21272 K21271 K22801 K22802	M00848	M00848 : Aurachin biosynthesis, anthranilate => aurachin A
md:M00849	C5 isoprenoid biosynthesis, mevalonate pathway, archaea	K00626 K01641 (K00021,K00054) ((K00869 K17942),(K18689 K18690 K22813)) K06981 K01823	M00849	M00849 : C5 isoprenoid biosynthesis, mevalonate pathway, archaea
md:M00850	Vibrio cholerae pathogenicity signature, cholera toxins	(K10928+K10929) K10954 K10952 K10953 K10948 K11018	M00850	M00850 : Vibrio cholerae pathogenicity signature, cholera toxins
md:M00851	Carbapenem resistance	(K18768,K18970,K19316,K22346,K18794,K19318,K18971,K18793,K19319,K19320,K19321,K19322,K18972,K19211,K18976,K21277,K18782,K18781,K18780,K19099,K19216)	M00851	M00851 : Carbapenem resistance
md:M00852	Vibrio cholerae pathogenicity signature, toxin coregulated pilus	K10961 K10920 K10919 K10930 K10931 K10962 K10932 K10963 K10933 K10964 K10965 K10934 K10935 K10966	M00852	M00852 : Vibrio cholerae pathogenicity signature, toxin coregulated pilus
md:M00853	ETEC pathogenicity signature, colonization factors	K22850 -K22851 K22852 K22853 K22854	M00853	M00853 : ETEC pathogenicity signature, colonization factors
md:M00854	Glycogen biosynthesis, glucose-1P => glycogen/starch	(K00963 (K00693+K00750,K16150,K16153,K13679,K20812)),(K00975 (K00703,K13679,K20812)) (K00700,K16149)	M00854	M00854 : Glycogen biosynthesis, glucose-1P => glycogen/starch
md:M00855	Glycogen degradation, glycogen => glucose-6P	(K00688,K16153) (K01196,((K00705,K22451) (K02438,K01200))) (K15779,K01835,K15778)	M00855	M00855 : Glycogen degradation, glycogen => glucose-6P
md:M00856	Salmonella enterica pathogenicity signature, typhoid toxin	K11014 K11023 K19298 K22918	M00856	M00856 : Salmonella enterica pathogenicity signature, typhoid toxin
md:M00857	Salmonella enterica pathogenicity signature, Vi antigen	K22914 K22926 K22925 K22915 K22916 K22917 (K22924+K22921+K22923+K22922)	M00857	M00857 : Salmonella enterica pathogenicity signature, Vi antigen
md:M00859	Bacillus anthracis pathogenicity signature, anthrax toxin	K11030 K08645 K11029	M00859	M00859 : Bacillus anthracis pathogenicity signature, anthrax toxin
md:M00860	Bacillus anthracis pathogenicity signature, polyglutamic acid capsule biosynthesis	K22976 K22977 K22980 K07282 K22116 K01932 K22981	M00860	M00860 : Bacillus anthracis pathogenicity signature, polyglutamic acid capsule biosynthesis
md:M00861	beta-Oxidation, peroxisome, VLCFA	K00232 K12405 (K07513,K08764)	M00861	M00861 : beta-Oxidation, peroxisome, VLCFA
md:M00862	beta-Oxidation, peroxisome, tri/dihydroxycholestanoyl-CoA => choloyl/chenodeoxycholoyl-CoA	K10214 K12405 K08764	M00862	M00862 : beta-Oxidation, peroxisome, tri/dihydroxycholestanoyl-CoA => choloyl/chenodeoxycholoyl-CoA
md:M00866	KDO2-lipid A biosynthesis, Raetz pathway, non-LpxL-LpxM type	K00677 (K02535,K16363) K02536 K03269 K00748 K00912 K02527 K02517 K09778	M00866	M00866 : KDO2-lipid A biosynthesis, Raetz pathway, non-LpxL-LpxM type
md:M00867	KDO2-lipid A modification pathway	K12977 K03760 K23082+K23083 K23159 K09953	M00867	M00867 : KDO2-lipid A modification pathway
md:M00868	Heme biosynthesis, animals and fungi, glycine => heme	K00643 K01698 K01749 K01719 K01599 K00228 K00231 K01772	M00868	M00868 : Heme biosynthesis, animals and fungi, glycine => heme
md:M00872	O-glycan biosynthesis, mannose type (core M3)	K00728 K18207 K09654 K17547	M00872	M00872 : O-glycan biosynthesis, mannose type (core M3)
md:M00873	Fatty acid biosynthesis in mitochondria, animals	K18660 K03955+K00645 K09458 K11539+K13370 K22540 K07512	M00873	M00873 : Fatty acid biosynthesis in mitochondria, animals
md:M00874	Fatty acid biosynthesis in mitochondria, fungi	K11262 K03955+K00645 K09458 K00059 K22541 K07512	M00874	M00874 : Fatty acid biosynthesis in mitochondria, fungi
md:M00875	Staphyloferrin B biosynthesis, L-serine => staphyloferrin B	K23371 K21949 K21721 K23372 K23373 K23374 K23375	M00875	M00875 : Staphyloferrin B biosynthesis, L-serine => staphyloferrin B
md:M00876	Staphyloferrin A biosynthesis, L-ornithine => staphyloferrin A	K21898 K23446 K23447	M00876	M00876 : Staphyloferrin A biosynthesis, L-ornithine => staphyloferrin A
md:M00877	Kanosamine biosynthesis, glucose 6-phosphate => kanosamine	K18652 K18653 K18654	M00877	M00877 : Kanosamine biosynthesis, glucose 6-phosphate => kanosamine
md:M00878	Phenylacetate degradation, phenylaxetate => acetyl-CoA/succinyl-CoA	K01912 K02609+K02610+K02611+K02612+K02613 K15866 K02618 K02615 K01692 K00074	M00878	M00878 : Phenylacetate degradation, phenylaxetate => acetyl-CoA/succinyl-CoA
md:M00879	Arginine succinyltransferase pathway, arginine => glutamate	K00673 K01484 K00840 K06447 K05526	M00879	M00879 : Arginine succinyltransferase pathway, arginine => glutamate
md:M00880	Molybdenum cofactor biosynthesis, GTP => molybdenum cofactor	((K03639 K03637),K20967) (K03635,K21142) (((K03831,K03638) K03750),K15376)	M00880	M00880 : Molybdenum cofactor biosynthesis, GTP => molybdenum cofactor
md:adh	Aldehyde dehydrogenase	K00128,K00149,K14085 K00129,K00138	adh	adh : Aldehyde dehydrogenase
md:ala1	Alanine and glutamate conversions	K00814,K14260,K14272	ala1	ala1 : Alanine and glutamate conversions
md:ala10	Alanine via selenite-lyase	K01763,K11717	ala10	ala10 : Alanine via selenite-lyase
md:ala11	Alanine aminotransferase	K03430,K09469	ala11	ala11 : Alanine aminotransferase
md:ala12	Alanine/Taurine aminotransferase	K03851	ala12	ala12 : Alanine/Taurine aminotransferase
md:ala13	Cystiene desulfurase	K04487	ala13	ala13 : Cystiene desulfurase
md:ala14	Alanine/arginine aminotransferase	K12252,K12253	ala14	ala14 : Alanine/arginine aminotransferase
md:ala15	Alanine/putrescine aminotransferase	K12256	ala15	ala15 : Alanine/putrescine aminotransferase
md:ala16	Alanine/GABA aminotransferase	K16871	ala16	ala16 : Alanine/GABA aminotransferase
md:ala17	Alanine/Pimeloyl-Ac	K00652	ala17	ala17 : Alanine/Pimeloyl-Ac
md:ala18	Alanine/tryptophan	K16903	ala18	ala18 : Alanine/tryptophan
md:ala19	Alanine from molybdenum sulfurtransferase	K15631	ala19	ala19 : Alanine from molybdenum sulfurtransferase
md:ala2	Alanine from aspartate	K09758	ala2	ala2 : Alanine from aspartate
md:ala3	Alanine transaminase	K00835,K14260	ala3	ala3 : Alanine transaminase
md:ala4	Alanine dehydrogenase	K19244,K00259	ala4	ala4 : Alanine dehydrogenase
md:ala5	Alanine racemase	K01775,K01798	ala5	ala5 : Alanine racemase
md:ala6	Serine:pyruvate aminotransferase	K13290,K00830	ala6	ala6 : Serine:pyruvate aminotransferase
[truncated: 25 more rows]
[truncated: 2,318 more columns]

## Sheet: Table S6 - Predatory Gene Freq
Count (C) and Frequency (P) of genes associated with predation or parasitism in BALOs vs non-BALOs vs Omnitrophota
[truncated: 231 more rows]

[truncated: 3 more sheets: Table S7 - Giant ORFs, Table S8 - 16S rRNA, Table S9 - SCMG]
